# Supplementary material for: Cascade transformation of 2-(diazoacetyl)-2H-azirines to 2-aroyl-3-hydroxy-1H-pyrroles via condensation with aromatic aldehydes
Source: publisher site journal article supplement (doi:10.3762/bjoc.22.70), 2026-06-09
Supplement: Additional file 1 [file 1860-5397-22-70-S1.pdf]

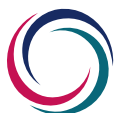

## Supporting Information

for

### **Cascade transformation of 2-(diazoacetyl)-2*H*-azirines to 2-aryl-3-hydroxy-1*H*-pyrroles via condensation with aromatic aldehydes**

Timur O. Zanakhov, Ekaterina E. Galenko, Mikhail S. Novikov  
and Alexander F. Khlebnikov

*Beilstein J. Org. Chem.* **2026**, 22, 897–904. [doi:10.3762/bjoc.22.70](https://doi.org/10.3762/bjoc.22.70)

**Full experimental details, characterization data and copies of  
NMR spectra for all new compounds**

## Table of contents

|                                                                                                                                                       |      |
|-------------------------------------------------------------------------------------------------------------------------------------------------------|------|
| 1. General information and methods                                                                                                                    | S2   |
| 2. Synthesis of (1 <i>RR</i> ,3 <i>SR</i> ,6 <i>RR</i> )-4-diazo-3-(4-iodophenyl)-1-(3-methoxyphenyl)-2-oxa-7-azabicyclo[4.1.0]heptan-5-one <b>4b</b> | S2   |
| 3. Synthesis of pyrroles <b>5a–p</b>                                                                                                                  | S3   |
| 4. Reactions of pyrrole <b>5a</b>                                                                                                                     | S12  |
| 6. X-ray diffraction experiments                                                                                                                      | S14  |
| 7. <sup>1</sup> H, <sup>13</sup> C and DEPT spectra of new compounds                                                                                  | S21  |
| 8. IR spectra of compound <b>4b</b>                                                                                                                   | S82  |
| 9. Computational details                                                                                                                              | S83  |
| 10. References                                                                                                                                        | S102 |

## 1. General information and methods.

Melting points were determined on a melting point apparatus.  $^1\text{H}$  (400 MHz) and  $^{13}\text{C}$  (100 MHz) NMR spectra were recorded on a NMR spectrometer in  $\text{CDCl}_3$  or  $\text{DMSO}-d_6$ . Chemical shifts ( $\delta$ ) are reported in parts per million downfield from tetramethylsilane (TMS,  $\delta = 0.00$ ).  $^1\text{H}$  NMR spectra were calibrated according to the residual peak of  $\text{CDCl}_3$  (7.26 ppm),  $\text{DMSO}-d_6$  (2.50 ppm) and  $\text{C}_6\text{D}_6$  (7.16 ppm);  $^{13}\text{C}\{^1\text{H}\}$  and  $^{13}\text{C}$  DEPT-135 spectra were calibrated according to the peak of  $\text{CDCl}_3$  (77.00 ppm),  $\text{DMSO}-d_6$  (39.51 ppm) and  $\text{C}_6\text{D}_6$  (128.06 ppm). Electrospray ionization (ESI) mass spectra were recorded on a mass spectrometer, HRMS-ESI-QTOF. Single crystals of **5a** were obtained by slow crystallization from toluene at room temperature. Single-crystal X-ray data were collected using a Rigaku (Oxford Diffraction) «XtaLAB SuperNova» (Cu  $\text{K}\alpha$ ,  $\lambda = 1.54184 \text{ \AA}$ , HyPix3000 type detector). Crystallographic data for the structures **5a** (CCDC 2536266) have been deposited with the Cambridge Crystallographic Data Centre. Thin-layer chromatography (TLC) was conducted on aluminum sheets with 0.2 mm silica gel with a fluorescent indicator. All solvents were dried and distilled prior to use. Physical and spectral data of 2-diazoacetyl-2*H*-azirines **1** prepared according to the published procedures were in agreement with previously reported values [1-4].

## 2. Synthesis of (1*RR*,3*SR*,6*RR*)-4-diazo-3-(4-iodophenyl)-1-(3-methoxyphenyl)-2-oxa-7-azabicyclo[4.1.0]heptan-5-one **4b**

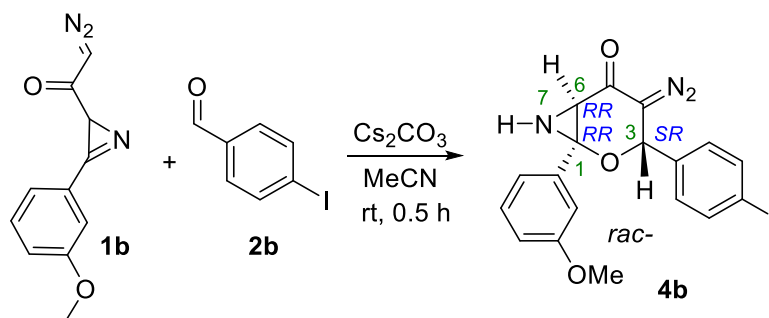

A mixture of 2-diazo-1-(3-(3-methoxyphenyl)-2*H*-azirin-2-yl)ethan-1-one (**1b**, 126 mg, 585  $\mu\text{mol}$ ), 4-iodobenzaldehyde (**2b**, 136 mg, 585  $\mu\text{mol}$ ) and  $\text{Cs}_2\text{CO}_3$  (95 mg, 293  $\mu\text{mol}$ ) in acetonitrile (8 mL) stirred at rt for 0.5 h (monitored by TLC). The reaction mixture was diluted with DCM, filtered through a pad of Celite and washed with DCM. The solvent was evaporated, the residue was diluted with acetonitrile (4 mL), cooled for 30 min at  $-18 \text{ }^\circ\text{C}$ , and precipitate was filtered and washed with cold acetonitrile (4 mL) to give compound **4b** in 128 mg (49% yield) as a beige solid: mp  $127\text{--}128 \text{ }^\circ\text{C}$  (dec., DCM);  $^1\text{H}$  NMR (400 MHz,  $\text{C}_6\text{D}_6$ ):  $\delta$  7.30 (d,  $J = 8.4 \text{ Hz}$ , 2H), 7.00-6.98 (m, 2H), 6.69-6.67 (m, 1H), 6.61-6.59 (m, 1H), 6.51 (d,  $J = 8.4 \text{ Hz}$ , 2H), 5.86 (s, 1H), 3.24 (s, 3H), 2.85 (d,  $J = 10.5 \text{ Hz}$ , 1H), 1.26 (d,  $J = 10.5 \text{ Hz}$ , 1H);  $^{13}\text{C}\{^1\text{H}\}$  NMR (100 MHz,  $\text{C}_6\text{D}_6$ ):  $\delta$  187.0 (C), 160.4 (C), 138.2 (CH), 138.1 (C), 135.3 (C), 130.0 (CH), 129.8 (CH), 117.4 (CH), 114.4 (CH), 112.2 (CH), 95.7 (C), 74.0 (C), 69.1 (CH), 65.6 (C), 54.9 ( $\text{CH}_3$ ), 41.7 (CH); IR (KBr,  $\text{cm}^{-1}$ ): 2087 ( $\text{CN}_2$ ); HRMS (ESI)  $m/z$  [ $\text{M} - \text{N}_2 + \text{H}$ ] $^+$  calcd for  $\text{C}_{18}\text{H}_{14}\text{INO}_3^+$  420.0091, found 420.0096.

### 3. Synthesis of pyrroles 5a-p

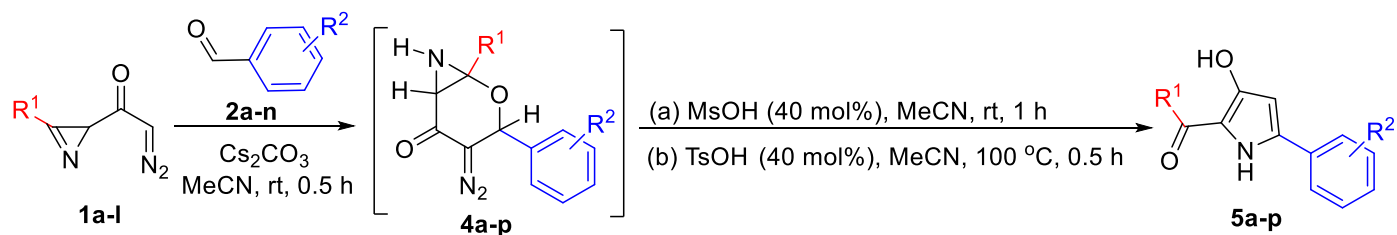

*General procedure A for the preparation of pyrroles 5.* A mixture of azirine **1** (1.0 mmol), aldehyde **2** (1 mmol) and Cs<sub>2</sub>CO<sub>3</sub> (0.5 mmol) in acetonitrile (4 mL) stirred at rt for 0.5 h (monitored by TLC). The mixture was filtered through a pad of Celite, washed with acetonitrile and TsOH monohydrate (0.4 mmol) was added to the solution. The mixture was stirred at 100 °C (oil bath temperature) for 1 h (monitored by TLC). The solvent was evaporated and the residue was purified by column chromatography on silica gel (light petroleum/ethyl acetate) to give pure compound **5**.

*General procedure B for the preparation of pyrroles 5.* A mixture of azirine **1** (1.0 mmol), aldehyde **2** (1 mmol) and Cs<sub>2</sub>CO<sub>3</sub> (0.5 mmol) in acetonitrile (4 mL) stirred at rt for 0.5 h (monitored by TLC). The mixture was filtered through a pad of Celite, washed with acetonitrile and MsOH (0.4 mmol) was added to the solution. The mixture was stirred at rt for 2 h (monitored by TLC). The solvent was evaporated and the residue was purified by column chromatography on silica gel (light petroleum/ethyl acetate) to give pure compound **5**.

#### (5-(4-Fluorophenyl)-3-hydroxy-1H-pyrrol-2-yl)(phenyl)methanone (**5a**)

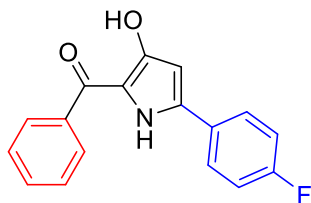

Compound **5a** was prepared following the general procedure A from 2-diazo-1-(3-phenyl-2H-azirin-2-yl)ethan-1-one (**1a**, 52 mg, 281 μmol), 4-fluorobenzaldehyde (**2a**, 35 mg, 281 μmol), Cs<sub>2</sub>CO<sub>3</sub> (46 mg, 140 μmol) and TsOH monohydrate (21 mg, 112 μmol) in acetonitrile (4 mL) to give pure product in 44 mg (56% yield), after column chromatography on silica (light petroleum/ethyl acetate, 3:1, (v/v)).

Compound **5a** was also prepared following the general procedure B from 2-diazo-1-(3-phenyl-2H-azirin-2-yl)ethan-1-one (**1a**, 52 mg, 281 μmol), 4-fluorobenzaldehyde (**2a**, 35 mg, 281 μmol), Cs<sub>2</sub>CO<sub>3</sub> (46 mg, 140 μmol) and MsOH (12 mg, 112 μmol) in acetonitrile (4 mL) to give pure product in 48 mg (62% yield), after column chromatography on silica (light petroleum/ethyl acetate, 3:1, (v/v)).

A light brown solid: mp 176–177 °C (light petroleum/ethyl acetate); <sup>1</sup>H NMR (400 MHz, CDCl<sub>3</sub>): δ 10.36 (br. s, 1H), 8.02 (br. s, 1H), 7.82–7.79 (m, 2H), 7.60–7.55 (m, 3H), 7.53–7.48 (m, 2H), 7.16–7.10 (m, 2H), 6.22 (d, *J* = 2.6 Hz, 1H); <sup>13</sup>C{<sup>1</sup>H} NMR (100 MHz, CDCl<sub>3</sub>): δ 184.3 (C), 163.2 (C), 163.1 (d, *J* = 250.1 Hz, C), 138.02 (C), 137.96 (C), 131.7 (CH), 129.2 (CH), 127.5 (CH), 127.17 (d, *J* = 8.4 Hz, CH), 127.05 (d, *J* =

3.4 Hz, C), 116.9 (C), 116.3 (d,  $J = 22.1$  Hz, CH), 96.6 (CH); HRMS (ESI)  $m/z$   $[M + H]^+$  calcd for  $C_{17}H_{13}FNO_2^+$  282.0925, found 282.0925.

### (3-Hydroxy-5-(4-iodophenyl)-1H-pyrrol-2-yl)(3-methoxyphenyl)methanone (**5b**)

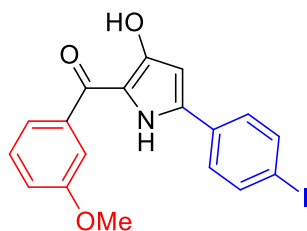

Compound **5b** was prepared following the general procedure A from 2-diazo-1-(3-(3-methoxyphenyl)-2H-azirin-2-yl)ethan-1-one (**1b**, 76 mg, 353  $\mu$ mol), 4-iodobenzaldehyde (**2b**, 82 mg, 353  $\mu$ mol),  $CS_2CO_3$  (58 mg, 177  $\mu$ mol) and TsOH monohydrate (25 mg, 141  $\mu$ mol) in acetonitrile (4 mL) to give pure product in 53 mg (36% yield), after column chromatography on silica (light petroleum/ethyl acetate, 4:1, (v/v)).

Compound **5b** was also prepared following the general procedure B from 2-diazo-1-(3-(3-methoxyphenyl)-2H-azirin-2-yl)ethan-1-one (**1b**, 73 mg, 339  $\mu$ mol), 4-iodobenzaldehyde (**2b**, 79 mg, 339  $\mu$ mol),  $CS_2CO_3$  (55 mg, 170  $\mu$ mol) and MsOH (13 mg, 136  $\mu$ mol) in acetonitrile (4 mL) to give pure product in 31 mg (22% yield), after column chromatography on silica (light petroleum/ethyl acetate, 4:1, (v/v)).

A light brown solid: mp 141–142 °C (light petroleum/ethyl acetate);  $^1H$  NMR (400 MHz,  $CDCl_3$ ):  $\delta$  10.25 (br. s, 1H), 8.13 (br. s, 1H), 7.76 (d,  $J = 8.4$  Hz, 2H), 7.49–7.45 (m, 1H), 7.37–7.35 (m, 1H), 7.32–7.31 (m, 1H), 7.25 (d,  $J = 8.4$  Hz, 2H), 7.14–7.11 (m, 1H), 6.25 (d,  $J = 2.8$  Hz, 1H), 3.89 (s, 3H);  $^{13}C\{^1H\}$  NMR (100 MHz,  $CDCl_3$ ):  $\delta$  184.2 (C), 160.3 (C), 159.3 (C), 139.2 (C), 138.3 (CH), 137.6 (C), 130.2 (CH), 130.1 (C), 126.8 (CH), 119.5 (CH), 118.0 (CH), 117.0 (C), 112.6 (CH), 96.8 (CH), 94.6 (C), 55.5 (CH<sub>3</sub>); HRMS (ESI)  $m/z$   $[M + H]^+$  calcd for  $C_{18}H_{15}INO_3^+$  420.0091, found 420.0095.

### (3-Hydroxy-5-(naphthalen-1-yl)-1H-pyrrol-2-yl)(4-methoxyphenyl)methanone (**5c**)

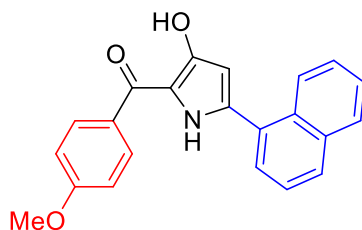

Compound **5c** was prepared following the general procedure A from 2-diazo-1-(3-(4-methoxyphenyl)-2H-azirin-2-yl)ethan-1-one (**1c**, 63 mg, 293  $\mu$ mol), 1-naphthaldehyde (**2d**, 46 mg, 293  $\mu$ mol),  $CS_2CO_3$  (48 mg, 146  $\mu$ mol) and TsOH monohydrate (21 mg, 117  $\mu$ mol) in acetonitrile (3 mL) to give pure product in 41 mg (41% yield), after column chromatography on silica (light petroleum/ethyl acetate, 3:1, (v/v)).

Compound **5c** was also prepared following the general procedure B from 2-diazo-1-(3-(4-methoxyphenyl)-2H-azirin-2-yl)ethan-1-one (**1c**, 62 mg, 288  $\mu$ mol), 1-naphthaldehyde (**2d**, 45 mg, 288  $\mu$ mol),  $CS_2CO_3$  (47 mg, 144  $\mu$ mol) and MsOH (11 mg, 115  $\mu$ mol) in acetonitrile (3 mL) to give pure product in 46 mg (47% yield), after column chromatography on silica (light petroleum/ethyl acetate, 3:1, (v/v)).

A light yellow solid: mp 147–148 °C (light petroleum/ethyl acetate);  $^1\text{H}$  NMR (400 MHz,  $\text{CDCl}_3$ ):  $\delta$  10.49 (br. s, 1H), 8.23–8.21 (m, 1H), 8.16 (br. s, 1H), 7.93–7.90 (m, 2H), 7.82 (d,  $J = 8.8$  Hz, 2H), 7.58–7.50 (m, 4H), 7.01 (d,  $J = 8.3$  Hz, 2H), 6.28 (d,  $J = 2.4$  Hz, 1H), 3.87 (s, 3H);  $^{13}\text{C}\{^1\text{H}\}$  NMR (100 MHz,  $\text{CDCl}_3$ ):  $\delta$  183.6 (C), 162.4 (C), 158.8 (C), 137.7 (C), 133.8 (C), 131.1 (C), 130.5 (C), 129.7 (C), 129.60 (CH), 129.55 (CH), 128.6 (CH), 127.1 (CH), 126.9 (CH), 126.4 (CH), 125.2 (CH), 125.0 (CH), 116.5 (C), 114.3 (CH), 100.2 (CH), 55.4 ( $\text{CH}_3$ ); HRMS (ESI)  $m/z$   $[\text{M} + \text{H}]^+$  calcd for  $\text{C}_{22}\text{H}_{18}\text{NO}_3^+$  344.1281, found 344.1279.

**(3-Hydroxy-5-(thiophen-2-yl)-1H-pyrrol-2-yl)(4-methoxyphenyl)methanone (5d)**

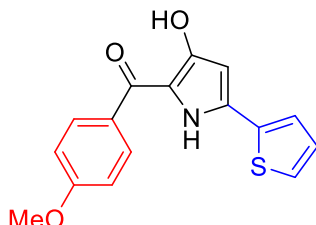

Compound **5d** was prepared following the general procedure A from 2-diazo-1-(3-(4-methoxyphenyl)-2H-azirin-2-yl)ethan-1-one (**1c**, 118 mg, 548  $\mu\text{mol}$ ), thiophene-2-carbaldehyde (**2e**, 61 mg, 548  $\mu\text{mol}$ ),  $\text{Cs}_2\text{CO}_3$  (89 mg, 274  $\mu\text{mol}$ ) and TsOH monohydrate (40 mg, 219  $\mu\text{mol}$ ) in acetonitrile (5 mL) to give pure product in 49 mg (30% yield), after column chromatography on silica (light petroleum/ethyl acetate, 5:1, (v/v)).

Compound **5d** was also prepared following the general procedure B from 2-diazo-1-(3-(4-methoxyphenyl)-2H-azirin-2-yl)ethan-1-one (**1c**, 74 mg, 344  $\mu\text{mol}$ ), thiophene-2-carbaldehyde (**2e**, 39 mg, 344  $\mu\text{mol}$ ),  $\text{Cs}_2\text{CO}_3$  (56 mg, 172  $\mu\text{mol}$ ) and MsOH (13 mg, 137  $\mu\text{mol}$ ) in acetonitrile (3 mL) to give pure product in 42 mg (41% yield), after column chromatography on silica (light petroleum/ethyl acetate, 5:1, (v/v)).

A light brown solid: mp 169–170 °C (light petroleum/ethyl acetate);  $^1\text{H}$  NMR (400 MHz,  $\text{CDCl}_3$ ):  $\delta$  10.45 (br. s, 1H), 8.02 (br. s, 1H), 7.79 (d,  $J = 8.8$  Hz, 2H), 7.33 (dd,  $J = 5.0, 1.2$  Hz, 1H), 7.25 (dd,  $J = 3.6, 1.2$  Hz, 1H), 7.08 (dd,  $J = 5.0, 3.6$  Hz, 1H), 7.04 (d,  $J = 8.8$  Hz, 2H), 6.17 (d,  $J = 2.6$  Hz, 1H), 3.90 (s, 3H);  $^{13}\text{C}\{^1\text{H}\}$  NMR (100 MHz,  $\text{CDCl}_3$ ):  $\delta$  183.2 (C), 162.5 (C), 159.3 (C), 134.0 (C), 133.1 (C), 130.4 (C), 129.6 (CH), 128.1 (CH), 126.0 (CH), 124.5 (CH), 116.3 (C), 114.3 (CH), 96.9 (CH), 55.5 ( $\text{CH}_3$ ); HRMS (ESI)  $m/z$   $[\text{M} + \text{H}]^+$  calcd for  $\text{C}_{16}\text{H}_{14}\text{NO}_3\text{S}^+$  300.0689, found 300.0691.

**(5-(4-Chlorophenyl)-3-hydroxy-1H-pyrrol-2-yl)(3,4-dimethoxyphenyl)methanone (5e)**

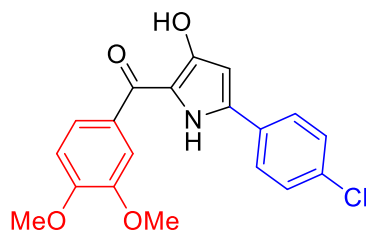

Compound **5e** was prepared following the general procedure A from 2-diazo-1-(3-(3,4-dimethoxyphenyl)-2H-azirin-2-yl)ethan-1-one (**1d**, 81 mg, 330  $\mu\text{mol}$ ), 4-chlorobenzaldehyde (**2f**, 46 mg, 330  $\mu\text{mol}$ ),  $\text{Cs}_2\text{CO}_3$  (54 mg, 165  $\mu\text{mol}$ ) and TsOH monohydrate (24 mg, 132  $\mu\text{mol}$ ) in acetonitrile (4 mL) to give pure product in 42 mg (36% yield), after column chromatography on silica (light petroleum/ethyl acetate, 3:1, (v/v)).

Compound **5e** was also prepared following the general procedure B from 2-diazo-1-(3-(3,4-dimethoxyphenyl)-2*H*-azirin-2-yl)ethan-1-one (**1d**, 83 mg, 338  $\mu\text{mol}$ ), 4-chlorobenzaldehyde (**2f**, 48 mg, 338  $\mu\text{mol}$ ),  $\text{Cs}_2\text{CO}_3$  (55 mg, 169  $\mu\text{mol}$ ) and  $\text{MsOH}$  (13 mg, 135  $\mu\text{mol}$ ) in acetonitrile (4 mL) to give pure product in 22 mg (18% yield), after column chromatography on silica (light petroleum/ethyl acetate, 3:1, (v/v)).

An orange solid: mp 204–205  $^\circ\text{C}$  (light petroleum/ethyl acetate);  $^1\text{H}$  NMR (400 MHz,  $\text{DMSO-}d_6$ ):  $\delta$  11.19 (d,  $J = 2.9$  Hz, 1H), 9.96 (br. s, 1H), 7.87 (d,  $J = 8.8$  Hz, 2H), 7.49–7.44 (m, 3H), 7.42–7.41 (m, 1H), 7.05 (d,  $J = 8.4$  Hz, 1H), 6.24 (d,  $J = 2.9$  Hz, 1H), 3.84 (s, 3H), 3.82 (s, 3H);  $^{13}\text{C}\{^1\text{H}\}$  NMR (100 MHz,  $\text{DMSO-}d_6$ ):  $\delta$  182.0 (C), 152.6 (C), 151.6 (C), 147.9 (C), 135.7 (C), 132.4 (C), 131.1 (C), 129.9 (C), 128.7 (CH), 127.3 (CH), 122.9 (CH), 117.9 (C), 112.4 (CH), 110.6 (CH), 97.0 (CH), 55.6 ( $\text{CH}_3$ ), 55.5 ( $\text{CH}_3$ ); HRMS (ESI)  $m/z$   $[\text{M} + \text{H}]^+$  calcd for  $\text{C}_{19}\text{H}_{17}\text{ClNO}_4^+$  358.0841, found 358.0842.

### (3-Hydroxy-5-(*p*-tolyl)-1*H*-pyrrol-2-yl)(phenyl)methanone (**5f**)

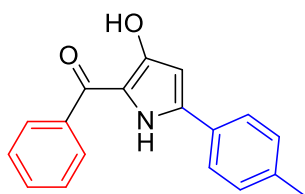

Compound **5f** was prepared following the general procedure A from 2-diazo-1-(3-phenyl-2*H*-azirin-2-yl)ethan-1-one (**1a**, 84 mg, 454  $\mu\text{mol}$ ), 4-methylbenzaldehyde (**2g**, 55 mg, 454  $\mu\text{mol}$ ),  $\text{Cs}_2\text{CO}_3$  (74 mg, 227  $\mu\text{mol}$ ) and  $\text{TsOH}$  monohydrate (33 mg, 181  $\mu\text{mol}$ ) in acetonitrile (4 mL) to give pure product in 46 mg (37% yield), after column chromatography on silica (light petroleum/ethyl acetate, 5:1, (v/v)).

Compound **5f** was also prepared following the general procedure B from 2-diazo-1-(3-phenyl-2*H*-azirin-2-yl)ethan-1-one (**1a**, 80 mg, 432  $\mu\text{mol}$ ), 4-methylbenzaldehyde (**2g**, 52 mg, 432  $\mu\text{mol}$ ),  $\text{Cs}_2\text{CO}_3$  (70 mg, 216  $\mu\text{mol}$ ) and  $\text{MsOH}$  (17 mg, 173  $\mu\text{mol}$ ) in acetonitrile (4 mL) to give pure product in 51 mg (43% yield), after column chromatography on silica (light petroleum/ethyl acetate, 5:1, (v/v)).

A light yellow solid: mp 164–165  $^\circ\text{C}$  (light petroleum/ethyl acetate);  $^1\text{H}$  NMR (400 MHz,  $\text{CDCl}_3$ ):  $\delta$  10.43 (br. s, 1H), 8.07 (br. s, 1H), 7.82–7.79 (m, 2H), 7.59–7.53 (m, 3H), 7.42 (d,  $J = 8.3$  Hz, 2H), 7.23 (d,  $J = 8.3$  Hz, 2H), 6.23 (d,  $J = 2.6$  Hz, 1H), 2.39 (s, 3H);  $^{13}\text{C}\{^1\text{H}\}$  NMR (100 MHz,  $\text{CDCl}_3$ ):  $\delta$  184.0 (C), 159.8 (C), 139.3 (C), 139.3 (C), 138.0 (C), 131.6 (CH), 129.8 (CH), 129.1 (CH), 127.8 (C), 127.5 (CH), 125.1 (CH), 116.6 (C), 96.1 (CH), 21.3 ( $\text{CH}_3$ ); HRMS (ESI)  $m/z$   $[\text{M} + \text{H}]^+$  calcd for  $\text{C}_{18}\text{H}_{16}\text{NO}_2^+$  278.1176, found 278.1181.

### (3-Hydroxy-5-(4-methoxyphenyl)-1*H*-pyrrol-2-yl)(*p*-tolyl)methanone (**5g**)

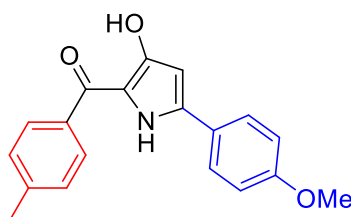

Compound **5g** was prepared following the general procedure A from 2-diazo-1-(3-(*p*-tolyl)-2*H*-azirin-2-yl)ethan-1-one (**1e**, 70 mg, 351  $\mu\text{mol}$ ), 4-methoxybenzaldehyde (**2h**, 48 mg, 351  $\mu\text{mol}$ ),  $\text{Cs}_2\text{CO}_3$  (57 mg, 176  $\mu\text{mol}$ ) and TsOH monohydrate (25 mg, 141  $\mu\text{mol}$ ) in acetonitrile (4 mL) to give pure product in 57 mg (53% yield), after column chromatography on silica (light petroleum/ethyl acetate, 3:1, (v/v)).

Compound **5g** was also prepared following the general procedure B from 2-diazo-1-(3-(*p*-tolyl)-2*H*-azirin-2-yl)ethan-1-one (**1e**, 65 mg, 326  $\mu\text{mol}$ ), 4-methoxybenzaldehyde (**2h**, 44 mg, 326  $\mu\text{mol}$ ),  $\text{Cs}_2\text{CO}_3$  (53 mg, 163  $\mu\text{mol}$ ) and MsOH (13 mg, 131  $\mu\text{mol}$ ) in acetonitrile (4 mL) to give pure product in 32 mg (30% yield), after column chromatography on silica (light petroleum/ethyl acetate, 3:1, (v/v)).

An orange oil;  $^1\text{H}$  NMR (400 MHz,  $\text{CDCl}_3$ ):  $\delta$  10.50 (br. s, 1H), 8.05 (br. s, 1H), 7.70 (d,  $J = 8.3$  Hz, 2H), 7.46 (d,  $J = 8.8$  Hz, 2H), 7.34 (d,  $J = 8.3$  Hz, 2H), 6.94 (d,  $J = 8.8$  Hz, 2H), 6.16 (d,  $J = 2.6$  Hz, 1H), 3.84 (s, 3H), 2.45 (s, 3H);  $^{13}\text{C}\{^1\text{H}\}$  NMR (100 MHz,  $\text{CDCl}_3$ ):  $\delta$  183.7 (C), 160.3 (C), 142.1 (C), 139.0 (C), 135.4 (C), 129.7 (CH), 127.6 (CH), 126.6 (CH), 123.4 (C), 116.5 (C), 114.6 (CH), 95.7 (CH), 55.4 ( $\text{CH}_3$ ), 21.6 ( $\text{CH}_3$ ); HRMS (ESI)  $m/z$   $[\text{M} + \text{H}]^+$  calcd for  $\text{C}_{19}\text{H}_{18}\text{NO}_3^+$  308.1281, found 308.1282.

#### N-(4-(4-Hydroxy-5-(4-methylbenzoyl)-1*H*-pyrrol-2-yl)phenyl)acetamide (**5h**)

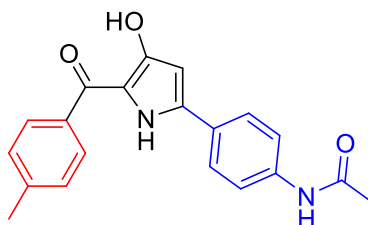

Compound **5h** was prepared following the general procedure A from 2-diazo-1-(3-(*p*-tolyl)-2*H*-azirin-2-yl)ethan-1-one (**1e**, 107 mg, 537  $\mu\text{mol}$ ), *N*-(4-formylphenyl)acetamide (**2i**, 88 mg, 537  $\mu\text{mol}$ ),  $\text{Cs}_2\text{CO}_3$  (88 mg, 269  $\mu\text{mol}$ ) and TsOH monohydrate (39 mg, 215  $\mu\text{mol}$ ) in acetonitrile (5 mL) to give pure product in 57 mg (32% yield), after column chromatography on silica (light petroleum/ethyl acetate, 1:2, (v/v)).

Compound **5h** was also prepared following the general procedure B from 2-diazo-1-(3-(*p*-tolyl)-2*H*-azirin-2-yl)ethan-1-one (**1e**, 103 mg, 517  $\mu\text{mol}$ ), *N*-(4-formylphenyl)acetamide (**2i**, 84 mg, 517  $\mu\text{mol}$ ),  $\text{Cs}_2\text{CO}_3$  (84 mg, 259  $\mu\text{mol}$ ) and MsOH (20 mg, 207  $\mu\text{mol}$ ) in acetonitrile (5 mL) to give pure product in 35 mg (20% yield), after column chromatography on silica (light petroleum/ethyl acetate, 3:1, (v/v)).

A beige solid: mp 265–266  $^\circ\text{C}$  (light petroleum/ethyl acetate);  $^1\text{H}$  NMR (400 MHz,  $\text{DMSO}-d_6$ ):  $\delta$  11.02 (d,  $J = 2.9$  Hz, 1H), 10.04 (s, 1H), 7.77 (d,  $J = 8.8$  Hz, 2H), 7.68 (d,  $J = 8.1$  Hz, 2H), 7.60 (d,  $J = 8.8$  Hz, 2H), 7.27 (d,  $J = 8.1$  Hz, 2H), 6.14 (d,  $J = 2.9$  Hz, 1H), 2.38 (s, 3H), 2.06 (s, 3H);  $^{13}\text{C}\{^1\text{H}\}$  NMR (100 MHz,  $\text{DMSO}-d_6$ ):  $\delta$  182.3 (C), 168.5 (C), 153.6 (C), 140.9 (C), 139.2 (C), 137.7 (C), 136.3 (C), 128.9 (CH), 128.4 (CH), 126.2 (CH), 125.7 (C), 118.9 (CH), 117.5 (C), 95.9 (CH), 24.1 ( $\text{CH}_3$ ), 21.1 ( $\text{CH}_3$ ); HRMS (ESI)  $m/z$   $[\text{M} + \text{H}]^+$  calcd for  $\text{C}_{20}\text{H}_{19}\text{N}_2\text{O}_3^+$  335.1390, found 335.1392.

**(5-(2,3-Dihydrobenzo[*b*][1,4]dioxin-6-yl)-3-hydroxy-1*H*-pyrrol-2-yl)(*p*-tolyl)methanone (5i)**

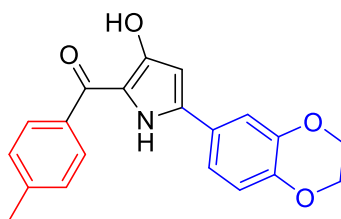

Compound **5i** was prepared following the general procedure A from 2-diazo-1-(3-(*p*-tolyl)-2*H*-azirin-2-yl)ethan-1-one (**1e**, 53 mg, 266  $\mu$ mol), 2,3-dihydrobenzo[*b*][1,4]dioxine-6-carbaldehyde (**2j**, 44 mg, 266  $\mu$ mol), Cs<sub>2</sub>CO<sub>3</sub> (43 mg, 133  $\mu$ mol) and TsOH monohydrate (19 mg, 106  $\mu$ mol) in acetonitrile (3 mL) to give pure product in 28 mg (31% yield), after column chromatography on silica (light petroleum/ethyl acetate, 3:1, (v/v)).

Compound **5i** was also prepared following the general procedure B from 2-diazo-1-(3-(*p*-tolyl)-2*H*-azirin-2-yl)ethan-1-one (**1e**, 50 mg, 251  $\mu$ mol), 2,3-dihydrobenzo[*b*][1,4]dioxine-6-carbaldehyde (**2j**, 41 mg, 251  $\mu$ mol), Cs<sub>2</sub>CO<sub>3</sub> (41 mg, 126  $\mu$ mol) and MsOH (10 mg, 100  $\mu$ mol) in acetonitrile (3 mL) to give pure product in 21 mg (25% yield), after column chromatography on silica (light petroleum/ethyl acetate, 3:1, (v/v)).

An orange oil; <sup>1</sup>H NMR (400 MHz, CDCl<sub>3</sub>):  $\delta$  10.43 (br. s, 1H), 7.97 (br. s, 1H), 7.70 (d, *J* = 8.3 Hz, 2H), 7.35 (d, *J* = 8.3 Hz, 2H), 7.03–7.00 (m, 2H), 6.92–6.89 (m, 1H), 6.15 (d, *J* = 2.6 Hz, 1H), 4.29 (s, 4H), 2.46 (s, 3H); <sup>13</sup>C{<sup>1</sup>H} NMR (100 MHz, CDCl<sub>3</sub>):  $\delta$  183.8 (C), 144.5 (C), 143.9 (C), 142.2 (C), 138.7 (C), 135.3 (C), 129.7 (CH), 127.6 (CH), 124.3 (C), 118.7 (CH), 118.0 (CH), 116.6 (C), 114.1 (CH), 95.9 (CH), 64.5 (CH<sub>2</sub>), 64.4 (CH<sub>2</sub>), 21.5 (CH<sub>3</sub>); HRMS (ESI) *m/z* [M + H]<sup>+</sup> calcd for C<sub>20</sub>H<sub>18</sub>NO<sub>4</sub><sup>+</sup> 336.1230, found 336.1233.

**(5-(4-Bromophenyl)-3-hydroxy-1*H*-pyrrol-2-yl)(4-(*tert*-butyl)phenyl)methanone (5j)**

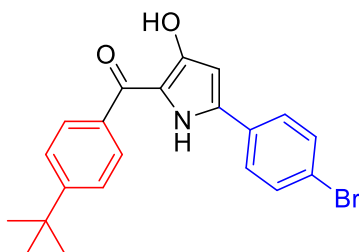

Compound **5j** was prepared following the general procedure A from 1-(3-(4-(*tert*-butyl)phenyl)-2*H*-azirin-2-yl)-2-diazoethan-1-one (**1f**, 72 mg, 298  $\mu$ mol), 4-bromobenzaldehyde (**2k**, 55 mg, 298  $\mu$ mol), Cs<sub>2</sub>CO<sub>3</sub> (49 mg, 149  $\mu$ mol) and TsOH monohydrate (22 mg, 119  $\mu$ mol) in acetonitrile (3 mL) to give pure product in 38 mg (32% yield), after column chromatography on silica (light petroleum/ethyl acetate, 10:1, (v/v)).

Compound **5j** was also prepared following the general procedure B from from 1-(3-(4-(*tert*-butyl)phenyl)-2*H*-azirin-2-yl)-2-diazoethan-1-one (**1f**, 67 mg, 278  $\mu$ mol), 4-bromobenzaldehyde (**2k**, 51 mg, 278  $\mu$ mol), Cs<sub>2</sub>CO<sub>3</sub> (45 mg, 139  $\mu$ mol) and MsOH (11 mg, 111  $\mu$ mol) in acetonitrile (3 mL) to give pure product in 24 mg (22% yield), after column chromatography on silica (light petroleum/ethyl acetate, 10:1, (v/v)).

A yellow solid; mp 217–218 °C (light petroleum/ethyl acetate); <sup>1</sup>H NMR (400 MHz, CDCl<sub>3</sub>):  $\delta$  10.33 (br. s, 1H), 8.13 (br. s, 1H), 7.75 (d, *J* = 8.4 Hz, 2H), 7.59–7.54 (m, 4H), 7.39 (d, *J* = 8.4 Hz, 2H), 6.25 (d, *J* = 2.6

Hz, 1H), 1.38 (s, 9H);  $^{13}\text{C}\{^1\text{H}\}$  NMR (100 MHz,  $\text{CDCl}_3$ ):  $\delta$  184.4 (C), 159.3 (C), 155.5 (C), 137.2 (C), 135.1 (C), 132.3 (CH), 129.7 (C), 127.4 (CH), 126.6 (CH), 126.1 (CH), 123.0 (C), 117.1 (C), 96.8 (CH), 35.1 (C), 31.1 ( $\text{CH}_3$ ); HRMS (ESI)  $m/z$   $[\text{M} + \text{H}]^+$  calcd for  $\text{C}_{21}\text{H}_{21}\text{BrNO}_2^+$  398.0750, found 398.0752.

**(5-(3-Bromophenyl)-3-hydroxy-1H-pyrrol-2-yl)(4-fluorophenyl)methanone (5k)**

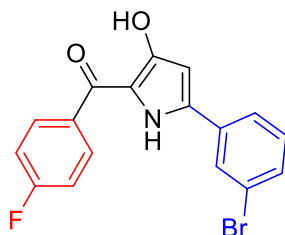

Compound **5k** was prepared following the general procedure A from 2-diazo-1-(3-(4-fluorophenyl)-2H-azirin-2-yl)ethan-1-one (**1g**, 84 mg, 413  $\mu\text{mol}$ ), 3-bromobenzaldehyde (**2l**, 77 mg, 413  $\mu\text{mol}$ ),  $\text{Cs}_2\text{CO}_3$  (67 mg, 207  $\mu\text{mol}$ ) and TsOH monohydrate (15 mg, 83  $\mu\text{mol}$ ) in acetonitrile (4 mL) to give pure product in 37 mg (25% yield), after column chromatography on silica (light petroleum/ethyl acetate, 3:1, (v/v)).

Compound **5k** was also prepared following the general procedure B from 2-diazo-1-(3-(4-fluorophenyl)-2H-azirin-2-yl)ethan-1-one (**1g**, 102 mg, 502  $\mu\text{mol}$ ), 3-bromobenzaldehyde (**2l**, 93 mg, 502  $\mu\text{mol}$ ),  $\text{Cs}_2\text{CO}_3$  (82 mg, 251  $\mu\text{mol}$ ) and MsOH (19 mg, 201  $\mu\text{mol}$ ) in acetonitrile (4 mL) to give pure product in 28 mg (15% yield), after column chromatography on silica (light petroleum/ethyl acetate, 3:1, (v/v)).

A light yellow solid: mp 165–166  $^\circ\text{C}$  (light petroleum/ethyl acetate);  $^1\text{H}$  NMR (400 MHz,  $\text{CDCl}_3$ ):  $\delta$  10.18 (br. s, 1H), 8.09 (d,  $J = 9.0$  Hz, 1H), 7.86–7.82 (m, 2H), 7.66 (s, 1H), 7.52–7.49 (m, 1H), 7.47–7.45 (m, 1H), 7.33–7.31 (m, 1H), 7.29–7.24 (m, 2H), 6.27 (d,  $J = 2.6$  Hz, 1H);  $^{13}\text{C}\{^1\text{H}\}$  NMR (100 MHz,  $\text{CDCl}_3$ ):  $\delta$  183.2 (C), 164.8 (d,  $J = 253.2$  Hz, C), 137.3 (C), 134.1 (d,  $J = 3.3$  Hz, C), 132.7 (C), 131.9 (CH), 130.7 (CH), 130.0 (d,  $J = 9.0$  Hz, CH), 128.2 (CH), 124.0 (CH), 123.3 (C), 117.0 (C), 116.3 (d,  $J = 21.9$  Hz, CH), 97.4 (CH); HRMS (ESI)  $m/z$   $[\text{M} + \text{H}]^+$  calcd for  $\text{C}_{17}\text{H}_{12}\text{BrFNO}_2^+$  360.0030, found 360.0031.

**(4-Chlorophenyl)(3-hydroxy-5-(*p*-tolyl)-1H-pyrrol-2-yl)methanone (5l).**

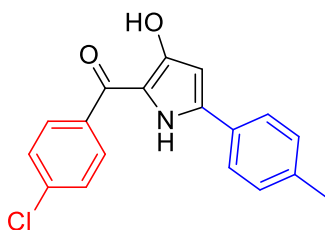

Compound **5l** was prepared following the general procedure A from 1-(3-(4-chlorophenyl)-2H-azirin-2-yl)-2-diazoethan-1-one **1h** (62 mg, 282  $\mu\text{mol}$ ), 4-methylbenzaldehyde **2g** (34 mg, 282  $\mu\text{mol}$ ),  $\text{Cs}_2\text{CO}_3$  (46 mg, 141  $\mu\text{mol}$ ) and TsOH monohydrate (21 mg, 113  $\mu\text{mol}$ ) in acetonitrile (4 mL) to give pure product in 26 mg (30% yield), after column chromatography on silica (light petroleum/ethyl acetate, 3:1, (v/v)).

Compound **5l** was also prepared following the general procedure B from 1-(3-(4-chlorophenyl)-2H-azirin-2-yl)-2-diazoethan-1-one **1h** (68 mg, 310  $\mu\text{mol}$ ), 4-methylbenzaldehyde **2g** (37 mg, 310  $\mu\text{mol}$ ),  $\text{Cs}_2\text{CO}_3$  (50

mg, 155  $\mu\text{mol}$ ) and MsOH (12 mg, 124  $\mu\text{mol}$ ) in acetonitrile (4 mL) to give pure product in 48 mg (62% yield), after column chromatography on silica (light petroleum/ethyl acetate, 3:1, (v/v)).

A light brown solid: mp 157–157 °C (light petroleum/ethyl acetate);  $^1\text{H}$  NMR (400 MHz,  $\text{CDCl}_3$ ):  $\delta$  10.36 (br. s, 1H), 7.99 (br. s, 1H), 7.76 (d,  $J = 8.4$  Hz, 2H), 7.54 (d,  $J = 8.4$  Hz, 2H), 7.42 (d,  $J = 8.1$  Hz, 2H), 7.24 (d,  $J = 8.1$  Hz, 2H), 6.24 (d,  $J = 2.6$  Hz, 1H), 2.39 (s, 3H);  $^{13}\text{C}\{^1\text{H}\}$  NMR (100 MHz,  $\text{CDCl}_3$ ):  $\delta$  182.5 (C), 139.9 (C), 139.5 (C), 137.9 (C), 136.3 (C), 129.9 (CH), 129.4 (CH), 129.0 (CH), 127.7 (C), 125.2 (CH), 116.6 (C), 96.3 (CH), 21.3 ( $\text{CH}_3$ ); HRMS (ESI)  $m/z$   $[\text{M} + \text{H}]^+$  calcd for  $\text{C}_{18}\text{H}_{15}\text{ClNO}_2^+$  312.0786, found 312.0783.

#### (4-Bromophenyl)(5-(2-chlorophenyl)-3-hydroxy-1H-pyrrol-2-yl)methanone (5m)

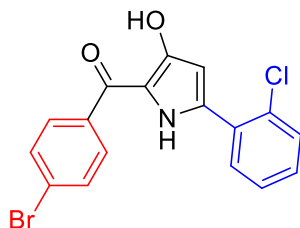

Compound **5m** was prepared following the general procedure A from 1-(3-(4-bromophenyl)-2H-azirin-2-yl)-2-diazoethan-1-one (**1i**, 60 mg, 227  $\mu\text{mol}$ ), 2-chlorobenzaldehyde (**2m**, 32 mg, 227  $\mu\text{mol}$ ),  $\text{Cs}_2\text{CO}_3$  (37 mg, 114  $\mu\text{mol}$ ) and TsOH monohydrate (17 mg, 91  $\mu\text{mol}$ ) in acetonitrile (3 mL) to give pure product in 34 mg (40% yield), after column chromatography on silica (light petroleum/ethyl acetate, 3:1, (v/v)).

Compound **5m** was also prepared following the general procedure B from 1-(3-(4-bromophenyl)-2H-azirin-2-yl)-2-diazoethan-1-one (**1i**, 63 mg, 239  $\mu\text{mol}$ ), 2-chlorobenzaldehyde (**2m**, 32 mg, 239  $\mu\text{mol}$ ),  $\text{Cs}_2\text{CO}_3$  (39 mg, 119  $\mu\text{mol}$ ) and MsOH (9 mg, 95  $\mu\text{mol}$ ) in acetonitrile (3 mL) to give pure product in 21 mg (23% yield), after column chromatography on silica (light petroleum/ethyl acetate, 3:1, (v/v)).

A light yellow solid: mp 170–171 °C (light petroleum/ethyl acetate);  $^1\text{H}$  NMR (400 MHz,  $\text{CDCl}_3$ ):  $\delta$  10.06 (br. s, 1H), 8.84 (br. s, 1H), 7.73–7.68 (m, 4H), 7.59 (dd,  $J = 7.5, 2.0$  Hz, 1H), 7.46 (dd,  $J = 7.7, 1.7$  Hz, 1H), 7.38 – 7.28 (m, 2H), 6.30 (d,  $J = 2.8$  Hz, 1H);  $^{13}\text{C}\{^1\text{H}\}$  NMR (100 MHz,  $\text{CDCl}_3$ ):  $\delta$  183.2 (C), 158.5 (C), 136.5 (C), 135.9 (C), 132.4 (CH), 131.2 (CH), 130.7 (C), 130.5 (CH), 129.9 (CH), 129.1 (CH), 128.8 (C), 127.6 (CH), 126.7 (C), 116.5 (C), 99.0 (CH); HRMS (ESI)  $m/z$   $[\text{M} + \text{H}]^+$  calcd for  $\text{C}_{17}\text{H}_{12}\text{BrClNO}_2^+$  375.9735, found 375.9736.

#### (2-Bromophenyl)(3-hydroxy-5-(p-tolyl)-1H-pyrrol-2-yl)methanone (5n)

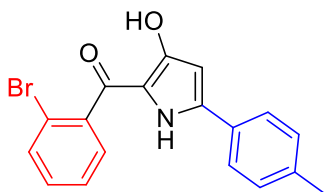

Compound **5n** was prepared following the general procedure A from 1-(3-(2-bromophenyl)-2H-azirin-2-yl)-2-diazoethan-1-one (**1j**, 105 mg, 398  $\mu\text{mol}$ ), 4-methylbenzaldehyde (**2g**, 48 mg, 398  $\mu\text{mol}$ ),  $\text{Cs}_2\text{CO}_3$  (65 mg, 199  $\mu\text{mol}$ ) and TsOH monohydrate (29 mg, 159  $\mu\text{mol}$ ) in acetonitrile (5 mL) to give pure product in 25 mg

(18% yield), after column chromatography on silica (light petroleum/ethyl acetate, 5:1, (v/v)) as a light brown solid: mp 192–193 °C (light petroleum/ethyl acetate); <sup>1</sup>H NMR (400 MHz, CDCl<sub>3</sub>): δ 10.01 (br. s, 1H), 7.75 (br. s, 1H), 7.72–7.70 (m, 1H), 7.51–7.44 (m, 2H), 7.40–7.36 (m, 3H), 7.21–7.19 (m, 2H), 6.21 (d, *J* = 2.6 Hz, 1H), 2.37 (s, 3H); <sup>13</sup>C{<sup>1</sup>H} NMR (100 MHz, CDCl<sub>3</sub>): δ 183.2 (C), 159.7 (C), 140.0 (C), 139.5 (C), 138.9 (C), 133.8 (CH), 131.6 (CH), 129.8 (CH), 129.0 (CH), 127.7 (C), 127.7 (CH), 125.2 (CH), 119.5 (C), 116.9 (C), 96.1 (CH), 21.3 (CH<sub>3</sub>); HRMS (ESI) *m/z* [M + H]<sup>+</sup> calcd for C<sub>18</sub>H<sub>14</sub>BrNO<sub>2</sub><sup>+</sup> 356.0281, found 356.0273.

**(Adamantan-1-yl)(5-(3,4-dimethoxyphenyl)-3-hydroxy-1H-pyrrol-2-yl)methanone (5o)**

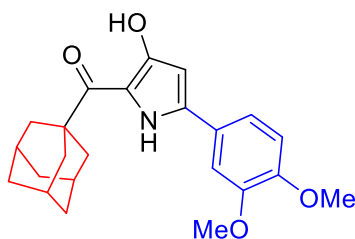

Compound **5o** was prepared following the general procedure A from 1-(3-(adamantan-1-yl)-2*H*-azirin-2-yl)-2-diazoethan-1-one (**1k**, 86 mg, 353 μmol), 3,4-dimethoxybenzaldehyde (**2n**, 59 mg, 353 μmol), Cs<sub>2</sub>CO<sub>3</sub> (58 mg, 177 μmol) and TsOH monohydrate (26 mg, 141 μmol) in acetonitrile (4 mL) to give pure product in 31 mg (23% yield), after column chromatography on silica (light petroleum/ethyl acetate, 5:1, (v/v)) as a beige solid: mp 195–196 °C (light petroleum/ethyl acetate); <sup>1</sup>H NMR (400 MHz, CDCl<sub>3</sub>): δ 11.32 (br. s, 1H), 8.09 (br. s, 1H), 7.08 (dd, *J* = 8.3, 2.2 Hz, 1H), 7.01 (d, *J* = 2.2 Hz, 1H), 6.93 (d, *J* = 8.3 Hz, 1H), 6.07 (d, *J* = 2.6 Hz, 1H), 3.95 (s, 3H), 3.93 (s, 3H), 2.15–2.13 (m, 3H), 2.09–2.08 (m, 6H), 1.86–1.78 (m, 6H); <sup>13</sup>C{<sup>1</sup>H} NMR (100 MHz, CDCl<sub>3</sub>): δ 195.6 (C), 161.0 (C), 150.0 (C), 149.5 (C), 137.5 (C), 124.2 (C), 117.6 (CH), 115.4 (C), 111.6 (CH), 109.2 (CH), 95.2 (CH), 56.2 (CH<sub>3</sub>), 56.0 (CH<sub>3</sub>), 44.9 (C), 39.5 (CH<sub>2</sub>), 36.7 (CH<sub>2</sub>), 28.1 (CH); HRMS (ESI) *m/z* [M + H]<sup>+</sup> calcd for C<sub>23</sub>H<sub>28</sub>NO<sub>4</sub><sup>+</sup> 382.2013, found 382.2018.

**(3-Hydroxy-5-phenyl-1H-pyrrol-2-yl)(thiophen-2-yl)methanone (5p)**

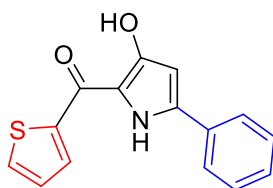

Compound **5p** was prepared following the general procedure A from 2-diazo-1-(3-(thiophen-2-yl)-2*H*-azirin-2-yl)ethan-1-one (**1l**, 81 mg, 423 μmol), benzaldehyde (**2c**, 45 mg, 423 μmol), Cs<sub>2</sub>CO<sub>3</sub> (69 mg, 212 μmol) and TsOH monohydrate (30 mg, 169 μmol) in acetonitrile (4 mL) to give pure product in 44 mg (39% yield), after column chromatography on silica (light petroleum/ethyl acetate, 4:1, (v/v)).

Compound **5p** was also prepared following the general procedure B from 2-diazo-1-(3-(thiophen-2-yl)-2*H*-azirin-2-yl)ethan-1-one (**1l**, 77 mg, 403 μmol), benzaldehyde (**2c**, 43 mg, 403 μmol), Cs<sub>2</sub>CO<sub>3</sub> (66 mg, 201 μmol) and MsOH (15 mg, 161 μmol) in acetonitrile (4 mL) to give pure product in 29 mg (27% yield), after column chromatography on silica (light petroleum/ethyl acetate, 4:1, (v/v)).

A light brown solid: mp 130–131 °C (light petroleum/ethyl acetate);  $^1\text{H}$  NMR (400 MHz,  $\text{CDCl}_3$ ):  $\delta$  10.39 (br. s, 1H), 8.35 (br. s, 1H), 7.80 (dd,  $J = 3.7, 1.3$  Hz, 1H), 7.68 (dd,  $J = 5.0, 1.3$  Hz, 1H), 7.49–7.56 (m, 2H), 7.48–7.44 (m, 2H), 7.42–7.38 (m, 1H), 7.25 (dd,  $J = 5.0, 3.7$  Hz, 1H), 6.28 (d,  $J = 2.6$  Hz, 1H);  $^{13}\text{C}\{^1\text{H}\}$  NMR (100 MHz,  $\text{CDCl}_3$ ):  $\delta$  174.9 (C), 160.2 (C), 141.6 (C), 139.5 (C), 131.5 (CH), 130.6 (C), 130.2 (CH), 129.20 (CH), 129.17 (CH), 128.2 (CH), 125.3 (CH), 116.2 (C), 96.8 (CH); HRMS (ESI)  $m/z$   $[\text{M} + \text{H}]^+$  calcd for  $\text{C}_{15}\text{H}_{12}\text{NO}_2\text{S}^+$  270.0583, found 270.0587.

#### 4. Reactions of pyrrole 5a

##### Ethyl 2-((2-benzoyl-5-(4-fluorophenyl)-1H-pyrrol-3-yl)oxy)acetate (6a)

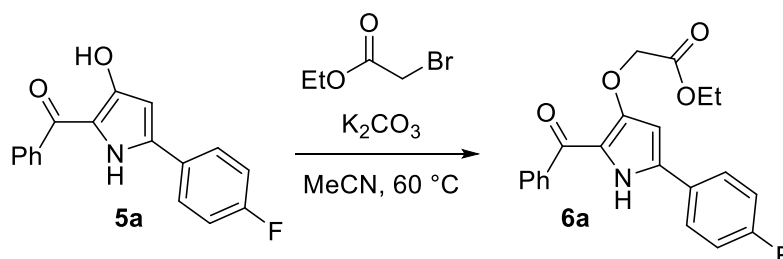

Compound **6a** was prepared following the published procedure [5] from (5-(4-fluorophenyl)-3-hydroxy-1H-pyrrol-2-yl)(phenyl)methanone (**5a**, 57 mg, 202  $\mu\text{mol}$ ), ethyl 2-bromoacetate (68 mg, 405  $\mu\text{mol}$ ), and  $\text{K}_2\text{CO}_3$  (84 mg, 608  $\mu\text{mol}$ ) in acetonitrile (3 mL) to give pure product in 70 mg (94% yield), after column chromatography on silica (light petroleum/ethyl acetate, 3:1, (v/v)) as a beige solid: mp 166–167 °C (light petroleum/ethyl acetate);  $^1\text{H}$  NMR (400 MHz,  $\text{DMSO}-d_6$ ):  $\delta$  11.67 (m, 1H), 7.96–7.93 (m, 2H), 7.82–7.80 (m, 2H), 7.55–7.50 (m, 1H), 7.45–7.41 (m, 2H), 7.29–7.24 (m, 2H), 6.51 (d,  $J = 2.9$  Hz, 1H), 4.66 (s, 2H), 4.14 (q,  $J = 7.1$  Hz, 2H), 1.19 (t,  $J = 7.1$  Hz, 3H);  $^{13}\text{C}\{^1\text{H}\}$  NMR (100 MHz,  $\text{DMSO}-d_6$ ):  $\delta$  182.4 (C), 168.4 (C), 161.9 (d,  $J = 245.6$  Hz, C), 151.7 (C), 139.0 (C), 135.8 (C), 131.1 (CH), 128.9 (CH), 127.7 (d,  $J = 8.2$  Hz, CH), 127.6 (CH), 127.4 (d,  $J = 3.0$  Hz, C), 118.1 (C), 115.6 (d,  $J = 21.7$  Hz, CH), 94.6 (CH), 66.9 (CH<sub>2</sub>), 60.6 (CH<sub>2</sub>), 14.0 (CH<sub>3</sub>); HRMS (ESI)  $m/z$   $[\text{M} + \text{H}]^+$  calcd for  $\text{C}_{21}\text{H}_{19}\text{FNO}_4^+$  368.1293, found 368.1294.

##### 2-((2-Benzoyl-5-(4-fluorophenyl)-1H-pyrrol-3-yl)oxy)-1-phenylethan-1-one (6b)

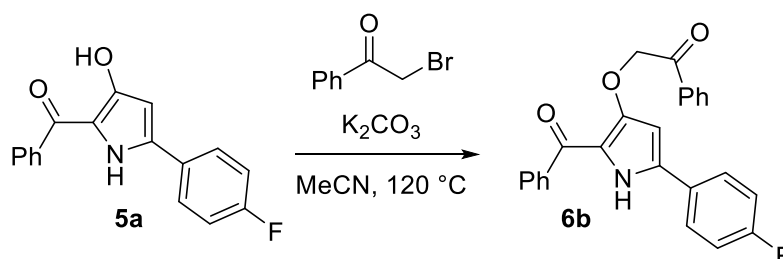

Compound **6b** was prepared following the published procedure [6] from (5-(4-fluorophenyl)-3-hydroxy-1H-pyrrol-2-yl)(phenyl)methanone (**5a**, 23 mg, 82  $\mu\text{mol}$ ), 2-bromo-1-phenylethan-1-one (33 mg, 164  $\mu\text{mol}$ ), and  $\text{K}_2\text{CO}_3$  (34 mg, 245  $\mu\text{mol}$ ) in acetonitrile (2 mL) to give pure product in 28 mg (85% yield), after column chromatography on silica (light petroleum/ethyl acetate, 3:1, (v/v)) as a beige solid: mp 176–175 °C (light petroleum/ethyl acetate);  $^1\text{H}$  NMR (400 MHz,  $\text{DMSO}-d_6$ ):  $\delta$  11.62 (br. s, 1H), 7.95–7.91 (m, 4H),

7.87–7.85 (m, 2H), 7.71–7.66 (m, 1H), 7.57–7.53 (m, 2H), 7.51–7.48 (m, 1H), 7.42–7.38 (m, 2H), 7.26–7.22 (m, 2H), 6.54 (d,  $J = 2.9$  Hz, 1H), 5.47 (s, 2H);  $^{13}\text{C}\{^1\text{H}\}$  NMR (100 MHz, DMSO- $d_6$ ):  $\delta$  194.4 (C), 182.4 (C), 161.9 (d,  $J = 245.6$  Hz, C), 152.3 (C), 139.1 (C), 135.9 (C), 134.3 (C), 133.8 (CH), 131.1 (CH), 128.9 (CH), 128.8 (C), 127.9 (CH), 127.64 (d,  $J = 8.4$  Hz, CH), 127.57 (CH), 127.5 (d,  $J = 3.3$  Hz, C), 118.1 (C), 115.6 (d,  $J = 21.7$  Hz, CH), 94.8 (CH), 72.6 (CH $_2$ ); HRMS (ESI)  $m/z$   $[\text{M} + \text{H}]^+$  calcd for  $\text{C}_{25}\text{H}_{19}\text{FNO}_3^+$  422.1163, found 422.1159.

### 2-Benzoyl-5-(4-fluorophenyl)-1H-pyrrol-3-yl trifluoromethanesulfonate (7a)

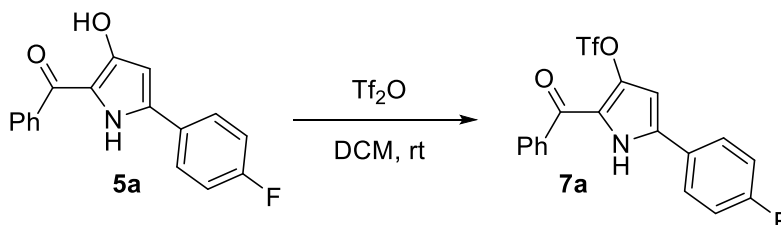

Compound **7a** was prepared following the published procedure [7] from (5-(4-fluorophenyl)-3-hydroxy-1H-pyrrol-2-yl)(phenyl)methanone (**5a**, 93 mg, 331  $\mu\text{mol}$ ),  $\text{Et}_3\text{N}$  (100 mg, 992  $\mu\text{mol}$ ), and  $\text{Tf}_2\text{O}$  (187 mg, 661  $\mu\text{mol}$ ) in DCM (3 mL) to give pure product in 116 mg (85% yield), after column chromatography on silica (light petroleum/ethyl acetate, 5:1, (v/v)) as a light yellow solid: mp 182–183  $^\circ\text{C}$  (light petroleum/ethyl acetate);  $^1\text{H}$  NMR (400 MHz,  $\text{CDCl}_3$ ):  $\delta$  10.04 (br. s, 1H), 7.80–7.77 (m, 2H), 7.65–7.61 (m, 3H), 7.53–7.51 (m, 2H), 7.16–7.12 (m, 2H), 6.53 (d,  $J = 3.1$  Hz, 1H);  $^{13}\text{C}\{^1\text{H}\}$  NMR (100 MHz,  $\text{CDCl}_3$ ):  $\delta$  184.1 (C), 163.3 (d,  $J = 250.3$  Hz, C), 138.4 (C), 137.0 (C), 135.7 (C), 132.9 (CH), 128.9 (CH), 128.5 (CH), 127.3 (d,  $J = 8.4$  Hz, CH), 126.0 (d,  $J = 3.7$  Hz, C), 121.5 (C), 118.3 (q,  $J = 321.4$  Hz, C), 116.5 (d,  $J = 21.9$  Hz, CH), 101.3 (CH); HRMS (ESI)  $m/z$   $[\text{M} + \text{H}]^+$  calcd for  $\text{C}_{18}\text{H}_{12}\text{F}_4\text{NO}_4\text{S}^+$  436.0237, found 436.0243.

## 6. X-ray diffraction experiments

Crystal structures of **5a** was determined by single crystal X-ray diffraction analysis. Suitable crystals were selected and fixed on micro-amounts and the diffraction data were collected on diffractometer. The crystals **5a** was measured at temperature 100 K, using monochromated CuK $\alpha$  radiation. The unit cell parameters and refinement characteristics of the crystal structures of **5a** is given below. Using Olex2 [8], the structure was solved with the ShelXT [9] structure solution program using Intrinsic Phasing and refined with the ShelXL [10] refinement package using Least Squares minimization.

### (5-(4-Fluorophenyl)-3-hydroxy-1*H*-pyrrol-2-yl)(phenyl)methanone (**5a**)

Single crystals of **5a** were obtained by slow recrystallization from dichloromethane at room temperature (CCDC 2536266)

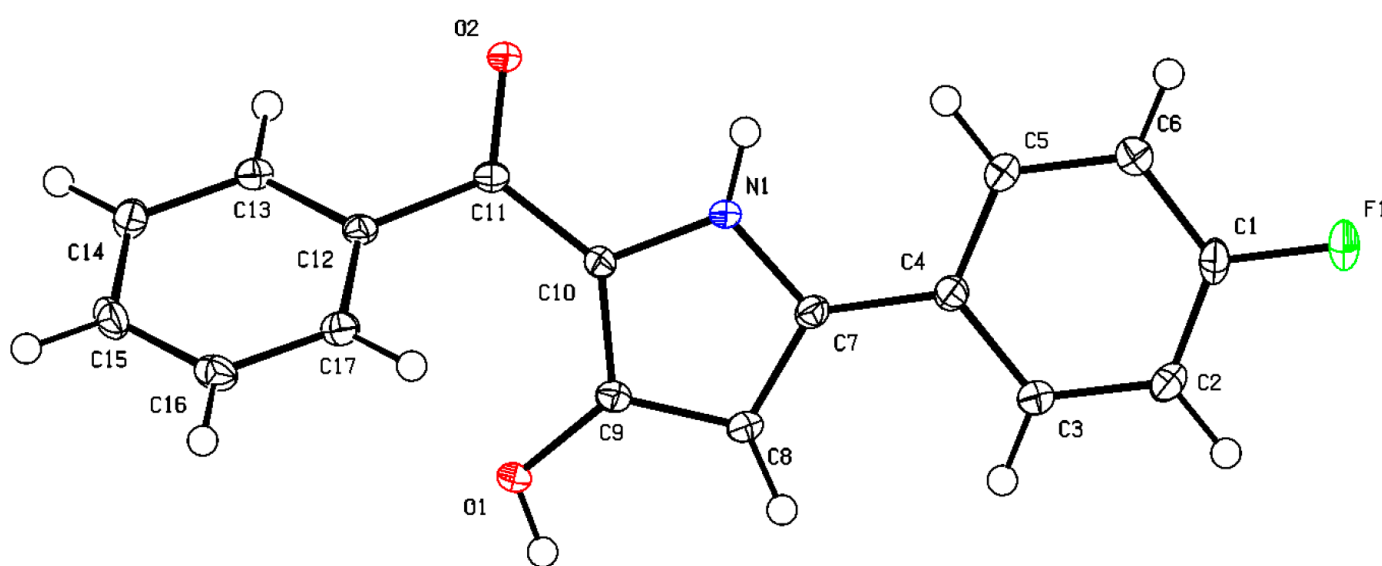

**Figure S1.** Molecular structure of compound **5a**, displacement parameters are drawn at 50% probability level.

**Table S1. Crystal data and structure refinement for 5a.**

---

|                                             |                                                               |
|---------------------------------------------|---------------------------------------------------------------|
| Identification code                         | 5a (TZ_AC)                                                    |
| Empirical formula                           | C <sub>17</sub> H <sub>12</sub> NO <sub>2</sub> F             |
| Formula weight                              | 281.28                                                        |
| Temperature/K                               | 100.01(10)                                                    |
| Crystal system                              | monoclinic                                                    |
| Space group                                 | P2 <sub>1</sub> /c                                            |
| a/Å                                         | 13.0439(3)                                                    |
| b/Å                                         | 11.4099(3)                                                    |
| c/Å                                         | 8.9076(2)                                                     |
| α/°                                         | 90                                                            |
| β/°                                         | 93.294(2)                                                     |
| γ/°                                         | 90                                                            |
| Volume/Å <sup>3</sup>                       | 1323.52(6)                                                    |
| Z                                           | 4                                                             |
| ρ <sub>calc</sub> /cm <sup>3</sup>          | 1.412                                                         |
| μ/mm <sup>-1</sup>                          | 0.851                                                         |
| F(000)                                      | 584.0                                                         |
| Crystal size/mm <sup>3</sup>                | 0.34 × 0.28 × 0.22                                            |
| Radiation                                   | Cu Kα (λ = 1.54184)                                           |
| 2θ range for data collection/°              | 6.788 to 144.968                                              |
| Index ranges                                | -16 ≤ h ≤ 11, -12 ≤ k ≤ 14, -11 ≤ l ≤ 10                      |
| Reflections collected                       | 4999                                                          |
| Independent reflections                     | 2597 [R <sub>int</sub> = 0.0206, R <sub>sigma</sub> = 0.0221] |
| Data/restraints/parameters                  | 2597/0/191                                                    |
| Goodness-of-fit on F <sup>2</sup>           | 1.027                                                         |
| Final R indexes [I ≥ 2σ (I)]                | R <sub>1</sub> = 0.0398, wR <sub>2</sub> = 0.1050             |
| Final R indexes [all data]                  | R <sub>1</sub> = 0.0418, wR <sub>2</sub> = 0.1071             |
| Largest diff. peak/hole / e Å <sup>-3</sup> | 0.24/-0.32                                                    |

---

**Table S2. Fractional atomic coordinates ( $\times 10^4$ ) and equivalent isotropic displacement parameters ( $\text{\AA}^2 \times 10^3$ ) for 5a.  $U_{\text{eq}}$  is defined as 1/3 of the trace of the orthogonalised  $U_{\text{IJ}}$  tensor.**

| Atom | <i>x</i>   | <i>y</i>   | <i>z</i>   | $U(\text{eq})$ |
|------|------------|------------|------------|----------------|
| F1   | 10767.1(6) | 5323.5(8)  | 2877.1(10) | 24.3(2)        |
| O2   | 4053.7(6)  | 4438.3(8)  | 4105.4(10) | 13.3(2)        |
| O1   | 4965.8(7)  | 1055.5(8)  | 2403.1(11) | 17.1(2)        |
| N1   | 6076.6(8)  | 3762.6(9)  | 3535.6(12) | 12.5(2)        |
| C10  | 5240.8(9)  | 3002.6(11) | 3475.2(14) | 12.3(3)        |
| C11  | 4265.9(9)  | 3370.1(11) | 3950.2(13) | 11.5(3)        |
| C9   | 5568.4(9)  | 1984.2(11) | 2739.0(14) | 12.9(3)        |
| C17  | 3768.3(10) | 1418.4(11) | 4985.6(14) | 14.9(3)        |
| C7   | 6890.1(9)  | 3249.2(11) | 2928.1(14) | 13.3(3)        |
| C4   | 7904.6(9)  | 3803.1(11) | 2931.3(14) | 14.0(3)        |
| C12  | 3484.7(9)  | 2476.8(11) | 4295.9(13) | 12.7(3)        |
| C13  | 2445.3(9)  | 2730.7(11) | 3987.7(14) | 14.8(3)        |
| C8   | 6588.5(9)  | 2145.9(11) | 2392.7(14) | 14.4(3)        |
| C5   | 8098.2(10) | 4885.3(12) | 3616.4(15) | 16.5(3)        |
| C1   | 9824.5(10) | 4816.9(13) | 2903.8(15) | 17.9(3)        |
| C14  | 1704.9(10) | 1924.6(12) | 4354.0(15) | 17.7(3)        |
| C16  | 3023.3(10) | 616.0(12)  | 5350.9(15) | 17.5(3)        |
| C6   | 9062.5(10) | 5398.5(12) | 3609.0(15) | 17.8(3)        |
| C3   | 8701.0(10) | 3238.1(12) | 2229.1(16) | 19.3(3)        |
| C15  | 1992.0(10) | 867.7(12)  | 5034.7(15) | 18.9(3)        |
| C2   | 9669.5(10) | 3745.5(12) | 2215.4(17) | 20.9(3)        |
| F1   | 10767.1(6) | 5323.5(8)  | 2877.1(10) | 24.3(2)        |
| O2   | 4053.7(6)  | 4438.3(8)  | 4105.4(10) | 13.3(2)        |
| O1   | 4965.8(7)  | 1055.5(8)  | 2403.1(11) | 17.1(2)        |
| N1   | 6076.6(8)  | 3762.6(9)  | 3535.6(12) | 12.5(2)        |
| C10  | 5240.8(9)  | 3002.6(11) | 3475.2(14) | 12.3(3)        |
| C11  | 4265.9(9)  | 3370.1(11) | 3950.2(13) | 11.5(3)        |

**Table S3. Anisotropic displacement parameters ( $\text{\AA}^2 \times 10^3$ ) for 5a. The anisotropic displacement factor exponent takes the form:  $-2\pi^2[h^2a^2U_{11}+2hka*b*U_{12}+\dots]$ .**

| Atom | U <sub>11</sub> | U <sub>22</sub> | U <sub>33</sub> | U <sub>23</sub> | U <sub>13</sub> | U <sub>12</sub> |
|------|-----------------|-----------------|-----------------|-----------------|-----------------|-----------------|
| F1   | 13.7(4)         | 26.8(5)         | 33.0(5)         | -2.1(4)         | 6.4(3)          | -6.9(3)         |
| O2   | 13.1(4)         | 9.5(4)          | 17.7(4)         | -0.8(3)         | 3.3(3)          | 0.6(3)          |
| O1   | 14.9(4)         | 11.8(5)         | 25.0(5)         | -7.6(4)         | 5.1(3)          | -2.1(3)         |
| N1   | 11.6(5)         | 8.6(5)          | 17.5(5)         | -1.3(4)         | 2.9(4)          | 0.5(4)          |
| C10  | 11.6(6)         | 10.1(6)         | 15.1(6)         | 0.7(4)          | 1.4(4)          | -0.3(4)         |
| C11  | 13.4(6)         | 10.6(6)         | 10.3(5)         | 0.0(4)          | -0.1(4)         | 1.3(4)          |
| C9   | 14.1(6)         | 10.4(6)         | 14.4(6)         | 0.4(4)          | 0.9(4)          | 0.8(4)          |
| C17  | 16.5(6)         | 13.5(6)         | 14.9(6)         | -0.6(5)         | 2.1(4)          | 1.3(5)          |
| C7   | 12.5(6)         | 12.3(6)         | 15.3(6)         | 1.5(5)          | 2.5(4)          | 2.2(4)          |
| C4   | 13.4(6)         | 12.8(6)         | 16.1(6)         | 2.6(5)          | 2.8(4)          | 1.0(4)          |
| C12  | 14.8(6)         | 11.3(6)         | 12.3(5)         | -2.8(4)         | 3.0(4)          | -0.4(4)         |
| C13  | 16.1(6)         | 12.2(6)         | 16.3(6)         | -2.1(5)         | 2.6(5)          | 1.1(4)          |
| C8   | 14.2(6)         | 12.0(6)         | 17.3(6)         | -1.3(5)         | 3.5(4)          | 2.2(4)          |
| C5   | 13.5(6)         | 17.1(6)         | 19.2(6)         | -0.8(5)         | 3.7(5)          | 1.1(5)          |
| C1   | 11.0(6)         | 21.0(7)         | 21.9(6)         | 3.8(5)          | 2.8(5)          | -2.7(5)         |
| C14  | 12.9(6)         | 19.8(7)         | 20.7(6)         | -3.9(5)         | 2.9(5)          | -1.4(5)         |
| C16  | 24.3(7)         | 12.1(6)         | 16.4(6)         | 1.5(5)          | 4.2(5)          | -0.6(5)         |
| C6   | 16.5(6)         | 16.7(6)         | 20.2(6)         | -2.1(5)         | 1.9(5)          | -1.8(5)         |
| C3   | 16.4(6)         | 13.4(6)         | 28.8(7)         | -1.4(5)         | 6.5(5)          | 0.8(5)          |
| C15  | 21.3(6)         | 17.5(6)         | 18.5(6)         | -2.6(5)         | 7.4(5)          | -7.9(5)         |
| C2   | 15.1(6)         | 18.5(7)         | 29.9(7)         | 0.5(6)          | 8.6(5)          | 2.9(5)          |
| F1   | 13.7(4)         | 26.8(5)         | 33.0(5)         | -2.1(4)         | 6.4(3)          | -6.9(3)         |
| O2   | 13.1(4)         | 9.5(4)          | 17.7(4)         | -0.8(3)         | 3.3(3)          | 0.6(3)          |
| O1   | 14.9(4)         | 11.8(5)         | 25.0(5)         | -7.6(4)         | 5.1(3)          | -2.1(3)         |
| N1   | 11.6(5)         | 8.6(5)          | 17.5(5)         | -1.3(4)         | 2.9(4)          | 0.5(4)          |
| C10  | 11.6(6)         | 10.1(6)         | 15.1(6)         | 0.7(4)          | 1.4(4)          | -0.3(4)         |
| C11  | 13.4(6)         | 10.6(6)         | 10.3(5)         | 0.0(4)          | -0.1(4)         | 1.3(4)          |

**Table S4. Bond lengths for 5a.**

| Atom | Atom | Length/ $\text{\AA}$ | Atom | Atom | Length/ $\text{\AA}$ |
|------|------|----------------------|------|------|----------------------|
| F1   | C1   | 1.3601(15)           | C7   | C8   | 1.3947(18)           |
| O2   | C11  | 1.2592(15)           | C4   | C5   | 1.3940(18)           |
| O1   | C9   | 1.3428(15)           | C4   | C3   | 1.4003(18)           |
| N1   | C10  | 1.3917(15)           | C12  | C13  | 1.3981(17)           |
| N1   | C7   | 1.3520(16)           | C13  | C14  | 1.3861(18)           |
| C10  | C11  | 1.4262(16)           | C5   | C6   | 1.3878(18)           |
| C10  | C9   | 1.4124(17)           | C1   | C6   | 1.3765(19)           |
| C11  | C12  | 1.4860(17)           | C1   | C2   | 1.377(2)             |
| C9   | C8   | 1.3954(17)           | C14  | C15  | 1.391(2)             |
| C17  | C12  | 1.3953(18)           | C16  | C15  | 1.388(2)             |
| C17  | C16  | 1.3873(18)           | C3   | C2   | 1.3903(19)           |
| C7   | C4   | 1.4664(17)           |      |      |                      |

**Table S5. Bond angles for 5a.**

| <b>Atom</b> | <b>Atom</b> | <b>Atom</b> | <b>Angle/°</b> | <b>Atom</b> | <b>Atom</b> | <b>Atom</b> | <b>Angle/°</b> |
|-------------|-------------|-------------|----------------|-------------|-------------|-------------|----------------|
| C7          | N1          | C10         | 110.22(10)     | C3          | C4          | C7          | 119.56(12)     |
| N1          | C10         | C11         | 121.01(11)     | C17         | C12         | C11         | 121.15(11)     |
| N1          | C10         | C9          | 105.87(10)     | C17         | C12         | C13         | 119.70(11)     |
| C9          | C10         | C11         | 132.71(11)     | C13         | C12         | C11         | 119.08(11)     |
| O2          | C11         | C10         | 121.51(11)     | C14         | C13         | C12         | 119.82(12)     |
| O2          | C11         | C12         | 118.91(10)     | C7          | C8          | C9          | 107.31(11)     |
| C10         | C11         | C12         | 119.58(11)     | C6          | C5          | C4          | 120.87(12)     |
| O1          | C9          | C10         | 124.32(11)     | F1          | C1          | C6          | 118.71(12)     |
| O1          | C9          | C8          | 127.48(11)     | F1          | C1          | C2          | 118.63(12)     |
| C8          | C9          | C10         | 108.16(11)     | C6          | C1          | C2          | 122.66(12)     |
| C16         | C17         | C12         | 120.19(12)     | C13         | C14         | C15         | 120.26(12)     |
| N1          | C7          | C4          | 122.78(11)     | C17         | C16         | C15         | 119.96(12)     |
| N1          | C7          | C8          | 108.40(11)     | C1          | C6          | C5          | 118.50(12)     |
| C8          | C7          | C4          | 128.78(11)     | C2          | C3          | C4          | 120.66(13)     |
| C5          | C4          | C7          | 121.56(11)     | C16         | C15         | C14         | 120.07(12)     |
| C5          | C4          | C3          | 118.88(12)     | C1          | C2          | C3          | 118.42(12)     |

**Table S6. Torsion angles for 5a.**

| <b>A</b> | <b>B</b> | <b>C</b> | <b>D</b> | <b>Angle/°</b> | <b>A</b> | <b>B</b> | <b>C</b> | <b>D</b> | <b>Angle/°</b> |
|----------|----------|----------|----------|----------------|----------|----------|----------|----------|----------------|
| F1       | C1       | C6       | C5       | 179.18(11)     | C9       | C10      | C11      | C12      | 26.2(2)        |
| F1       | C1       | C2       | C3       | -179.20(12)    | C17      | C12      | C13      | C14      | -0.70(18)      |
| O2       | C11      | C12      | C17      | -142.43(12)    | C17      | C16      | C15      | C14      | -0.1(2)        |
| O2       | C11      | C12      | C13      | 34.46(16)      | C7       | N1       | C10      | C11      | -175.53(11)    |
| O1       | C9       | C8       | C7       | 178.47(12)     | C7       | N1       | C10      | C9       | -1.99(14)      |
| N1       | C10      | C11      | O2       | 16.69(18)      | C7       | C4       | C5       | C6       | -179.95(12)    |
| N1       | C10      | C11      | C12      | -162.31(11)    | C7       | C4       | C3       | C2       | 179.94(12)     |
| N1       | C10      | C9       | O1       | -177.11(11)    | C4       | C7       | C8       | C9       | 175.76(12)     |
| N1       | C10      | C9       | C8       | 0.74(14)       | C4       | C5       | C6       | C1       | 0.2(2)         |
| N1       | C7       | C4       | C5       | 2.3(2)         | C4       | C3       | C2       | C1       | -0.2(2)        |
| N1       | C7       | C4       | C3       | -177.54(12)    | C12      | C17      | C16      | C15      | -0.23(19)      |
| N1       | C7       | C8       | C9       | -1.95(14)      | C12      | C13      | C14      | C15      | 0.37(19)       |
| C10      | N1       | C7       | C4       | -175.40(11)    | C13      | C14      | C15      | C16      | 0.0(2)         |
| C10      | N1       | C7       | C8       | 2.48(14)       | C8       | C7       | C4       | C5       | -175.09(12)    |
| C10      | C11      | C12      | C17      | 36.59(16)      | C8       | C7       | C4       | C3       | 5.0(2)         |
| C10      | C11      | C12      | C13      | -146.52(12)    | C5       | C4       | C3       | C2       | 0.1(2)         |
| C10      | C9       | C8       | C7       | 0.71(14)       | C16      | C17      | C12      | C11      | 177.50(11)     |
| C11      | C10      | C9       | O1       | -4.6(2)        | C16      | C17      | C12      | C13      | 0.64(18)       |
| C11      | C10      | C9       | C8       | 173.20(13)     | C6       | C1       | C2       | C3       | 0.4(2)         |
| C11      | C12      | C13      | C14      | -177.64(11)    | C3       | C4       | C5       | C6       | -0.1(2)        |
| C9       | C10      | C11      | O2       | -154.84(13)    | C2       | C1       | C6       | C5       | -0.4(2)        |

**Table S7. Hydrogen atom coordinates ( $\text{\AA} \times 10^4$ ) and isotropic displacement parameters ( $\text{\AA}^2 \times 10^3$ ) for 5a.**

| Atom | <i>x</i> | <i>y</i> | <i>z</i> | U(eq) |
|------|----------|----------|----------|-------|
| H1   | 5295.8   | 559.97   | 1927.25  | 26    |
| H1A  | 6075.76  | 4474.87  | 3914.61  | 15    |
| H17  | 4473.64  | 1246.64  | 5205.79  | 18    |
| H13  | 2247.01  | 3453.62  | 3528.47  | 18    |
| H8   | 7001.21  | 1604.82  | 1886.03  | 17    |
| H5   | 7562.96  | 5276.62  | 4094.79  | 20    |
| H14  | 998.64   | 2094.47  | 4139.58  | 21    |
| H16  | 3218.67  | -105.29  | 5817.1   | 21    |
| H6   | 9193.65  | 6134.66  | 4079.9   | 21    |
| H3   | 8578.4   | 2500.58  | 1757.32  | 23    |
| H15  | 1481.93  | 317.73   | 5283.31  | 23    |
| H2   | 10211.47 | 3362.36  | 1742.5   | 25    |

7.  $^1\text{H}$ ,  $^{13}\text{C}$  and DEPT spectra of new compounds

(1*RR*,3*SR*,6*RR*)-4-Diazo-3-(4-iodophenyl)-1-(3-methoxyphenyl)-2-oxa-7-azabicyclo[4.1.0]heptan-5-one (4b),  $^1\text{H}$  NMR,  $\text{C}_6\text{D}_6$ , 400 MHz

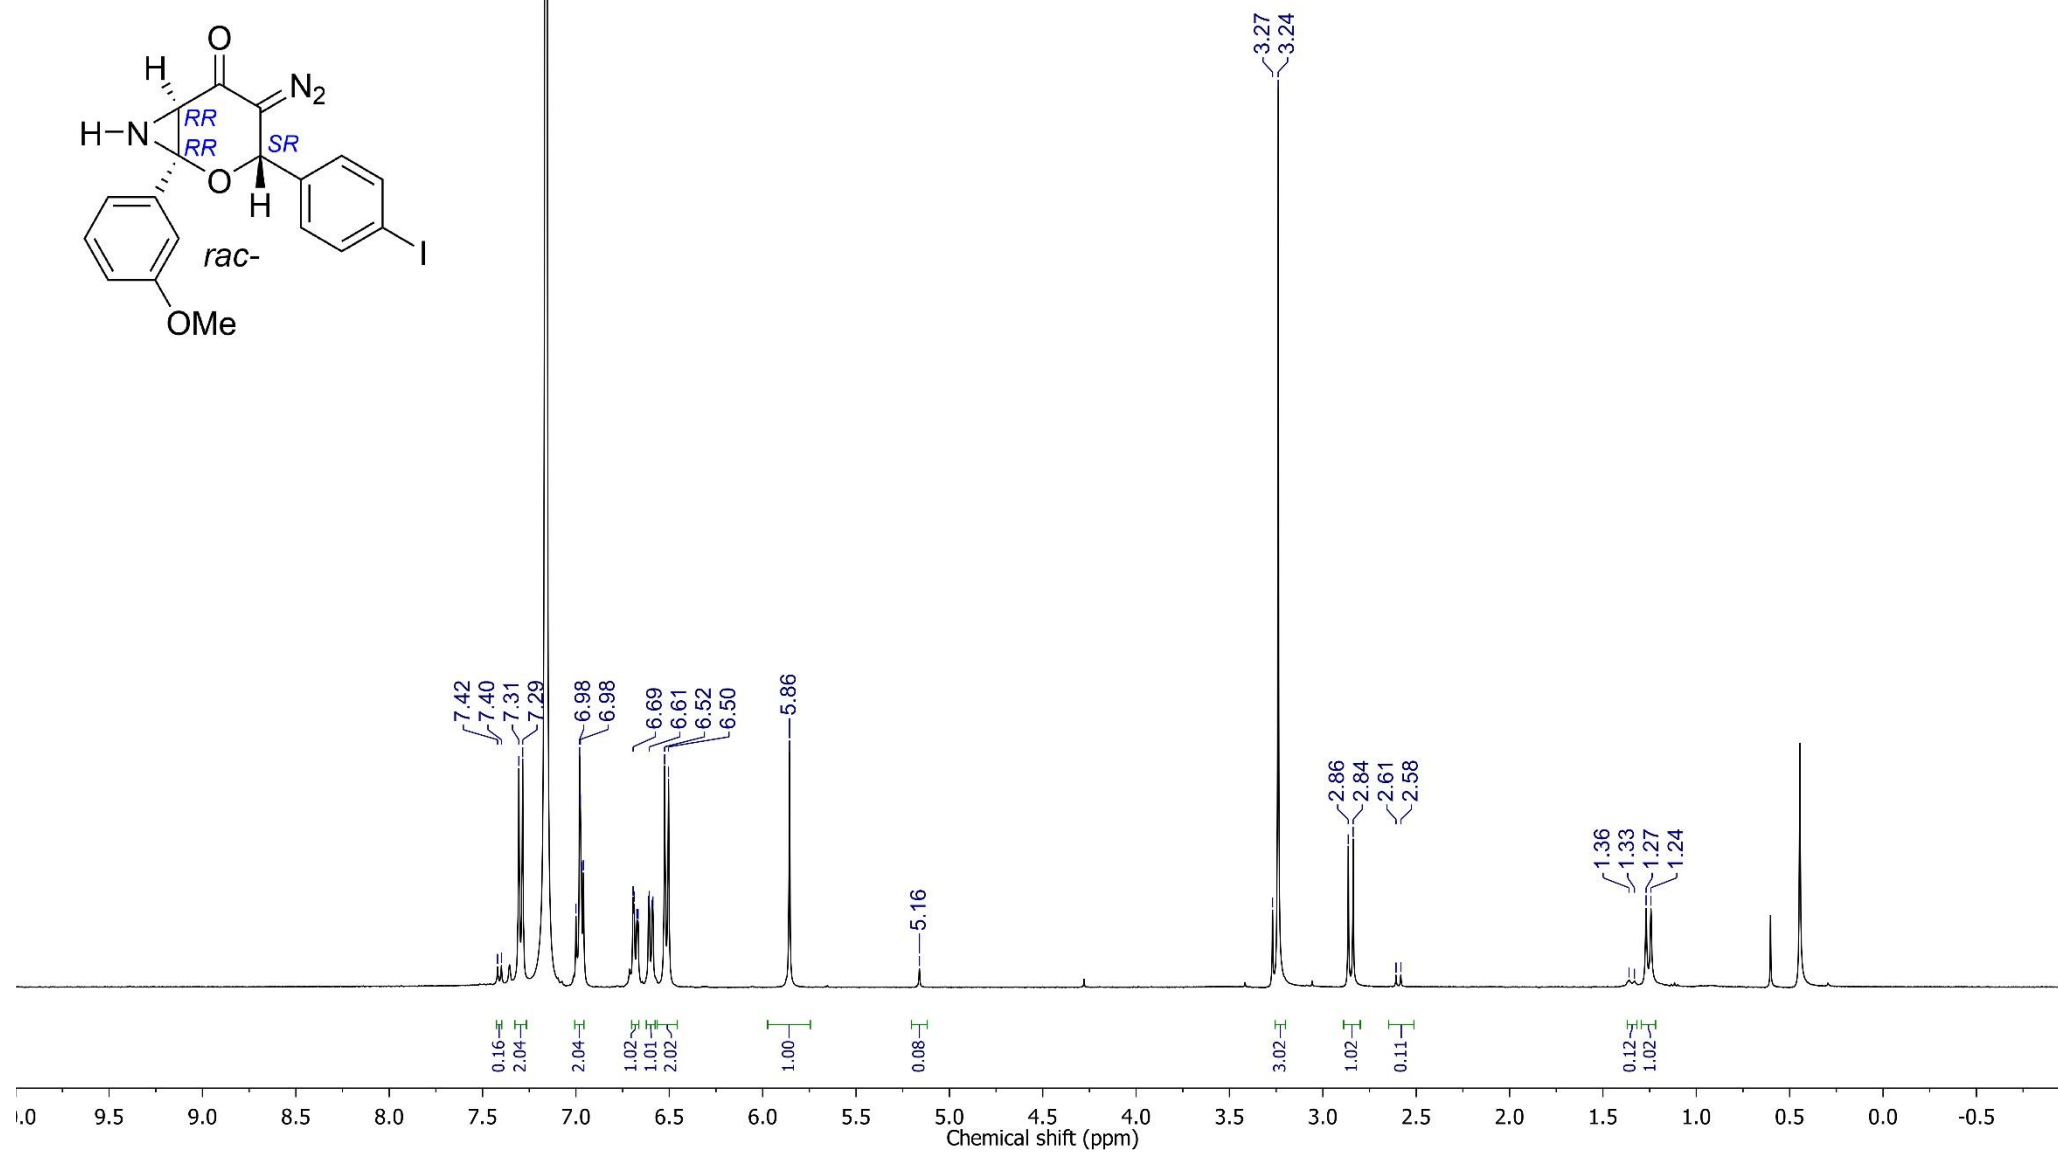

(1*RR*,3*SR*,6*RR*)-4-Diazo-3-(4-iodophenyl)-1-(3-methoxyphenyl)-2-oxa-7-azabicyclo[4.1.0]heptan-5-one (4b),  $^{13}\text{C}\{^1\text{H}\}$  NMR,  $\text{C}_6\text{D}_6$ , 100 MHz

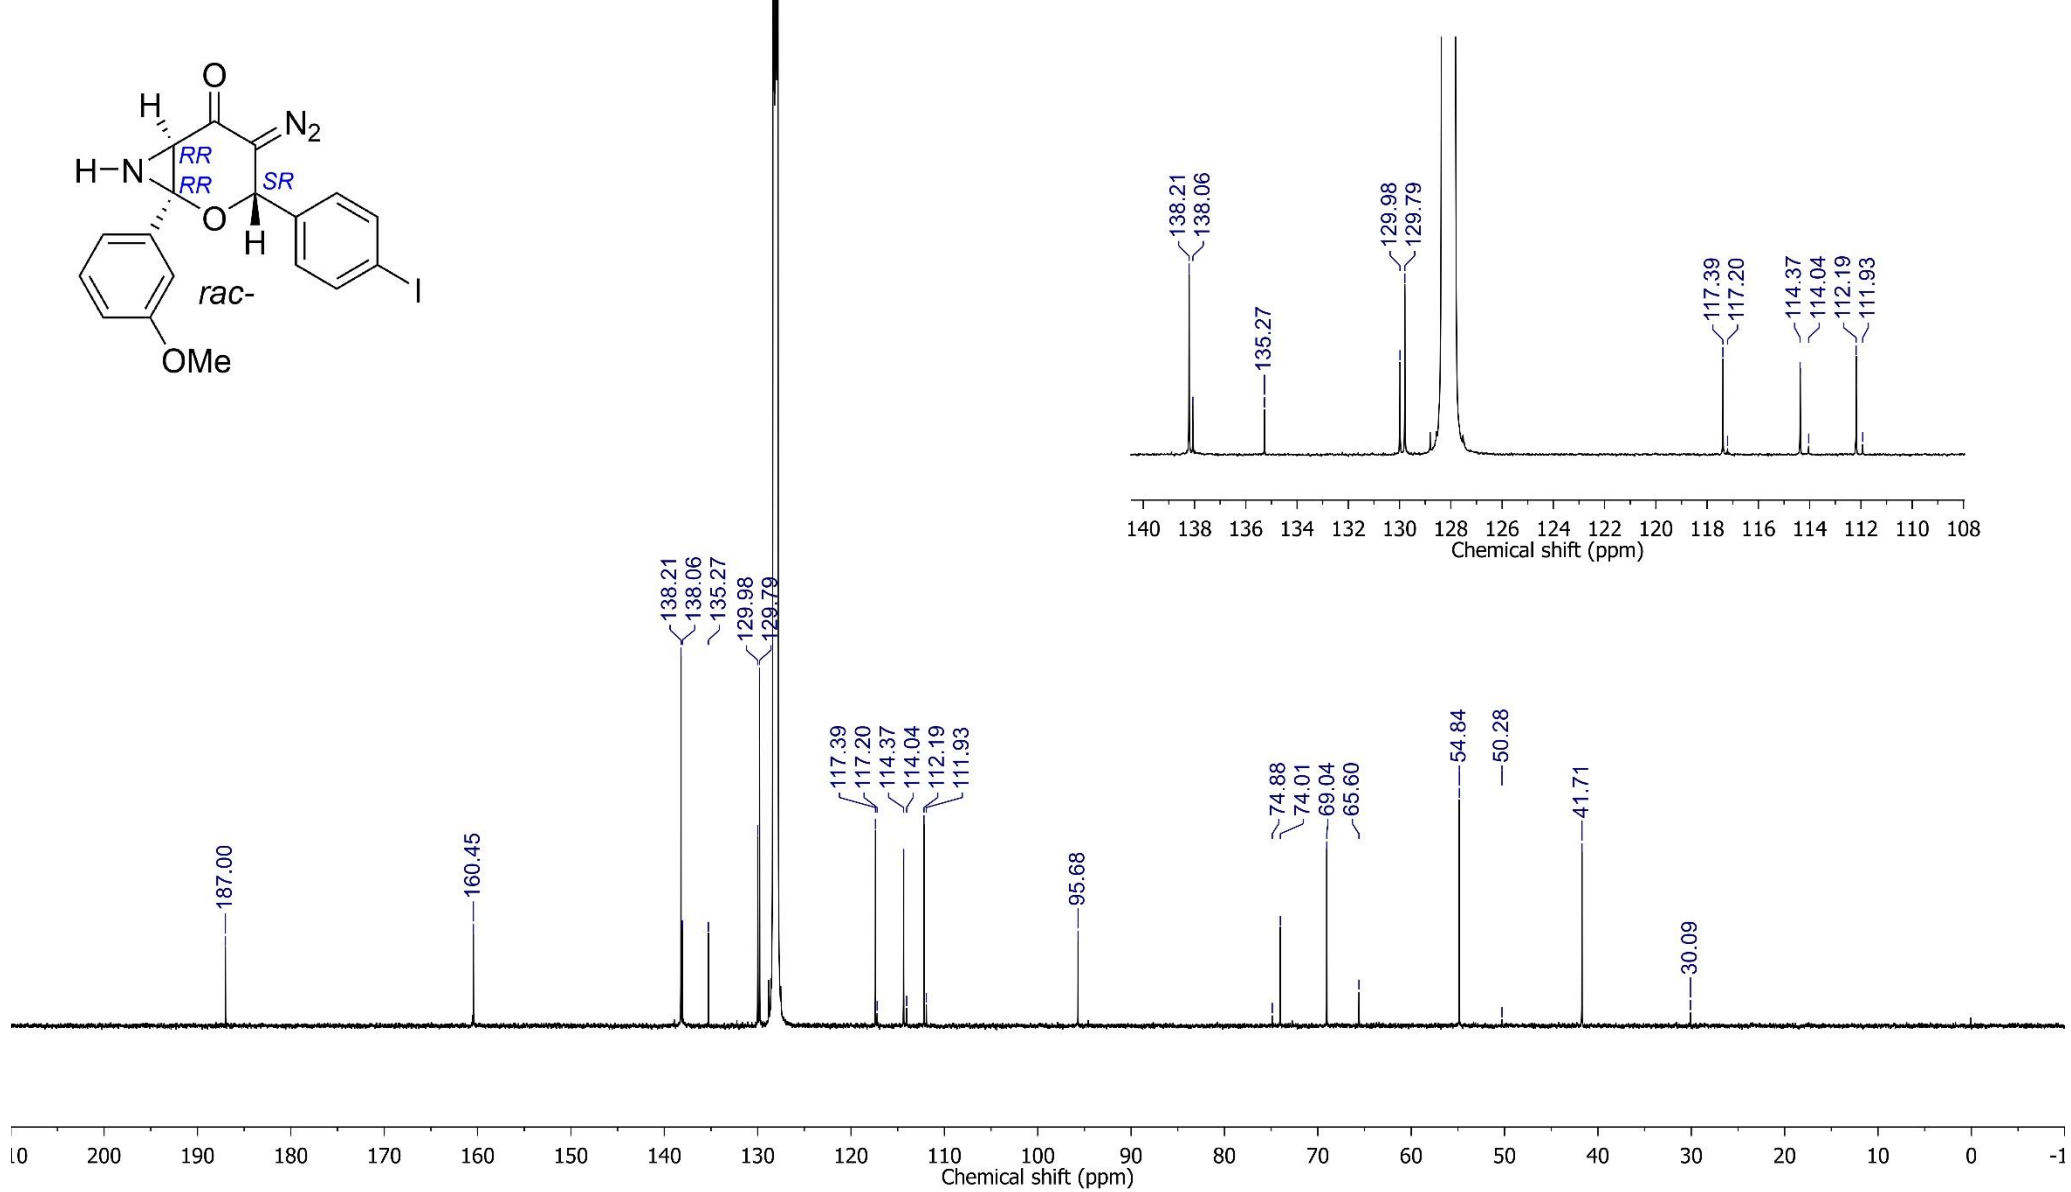

**(1*RR*,3*SR*,6*RR*)-4-Diazo-3-(4-iodophenyl)-1-(3-methoxyphenyl)-2-oxa-7-azabicyclo[4.1.0]heptan-5-one (4b), DEPT, C<sub>6</sub>D<sub>6</sub>, 100 MHz**

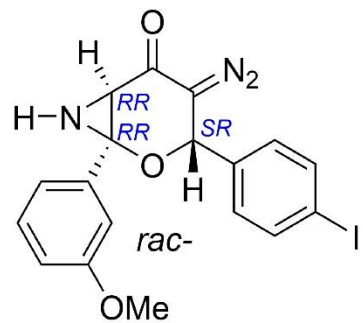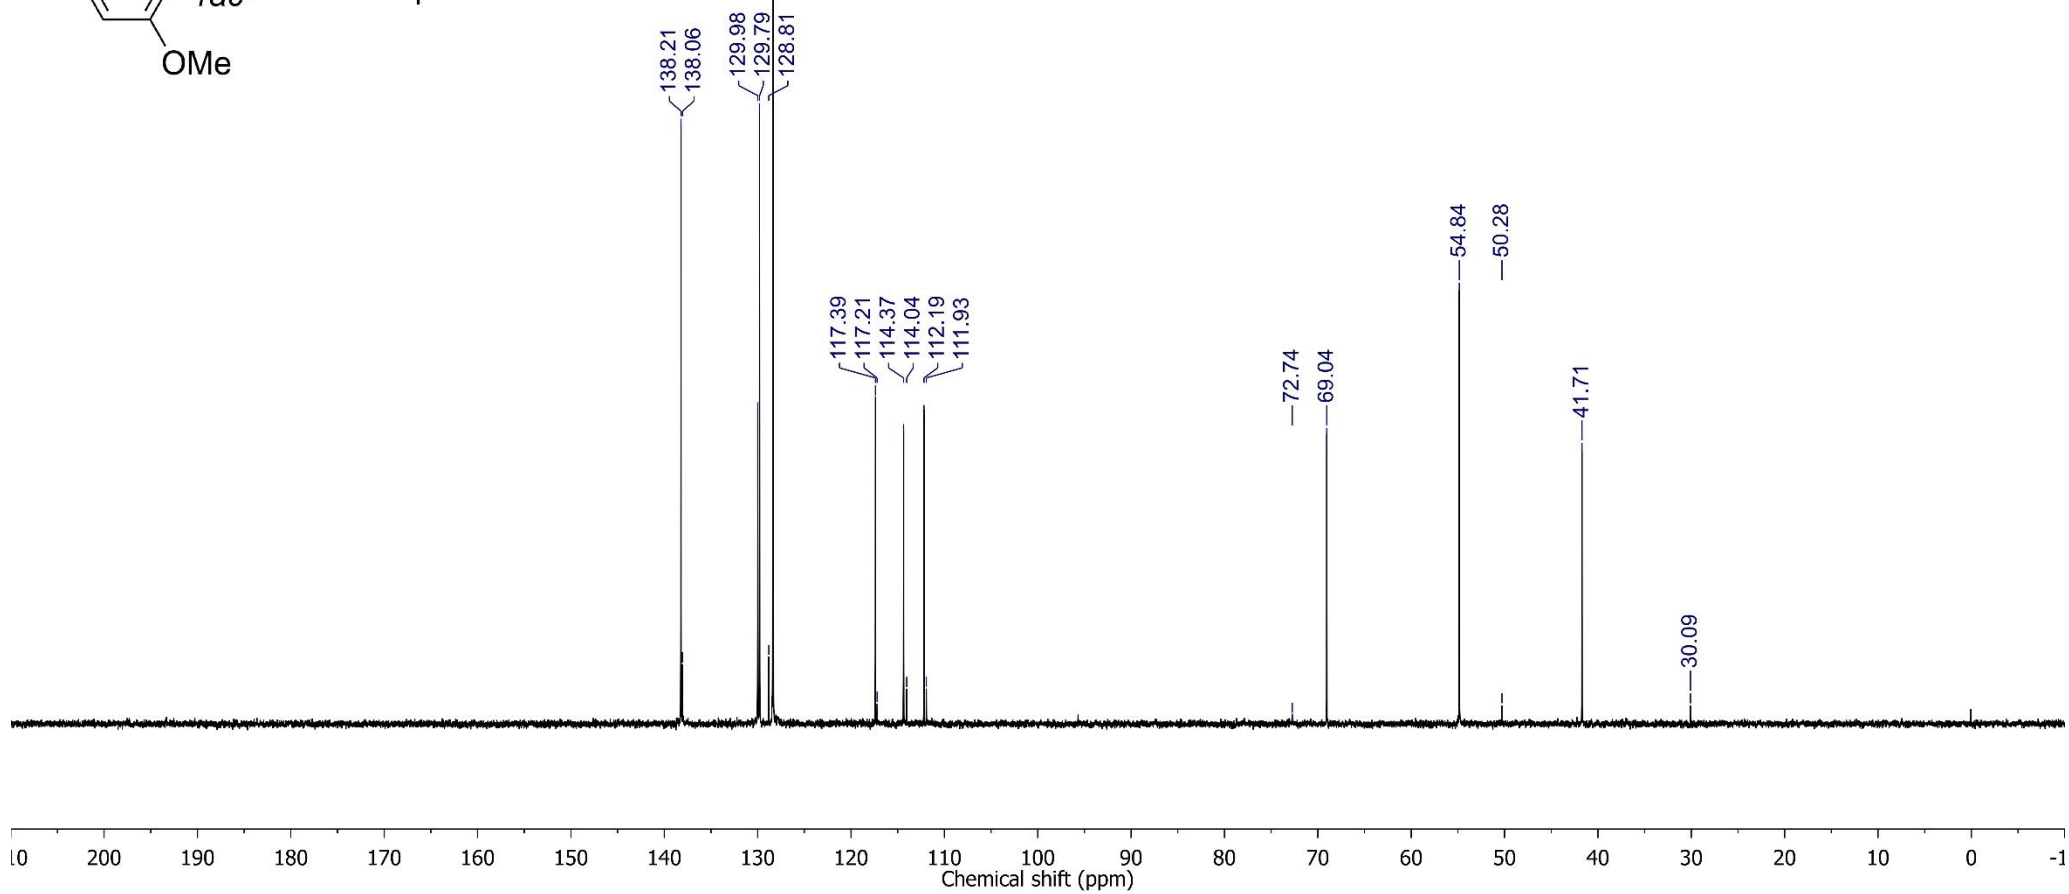

(1*RR*,3*SR*,6*RR*)-4-Diazo-3-(4-iodophenyl)-1-(3-methoxyphenyl)-2-oxa-7-azabicyclo[4.1.0]heptan-5-one (4b), <sup>1</sup>H 2D-NOESY, C<sub>6</sub>D<sub>6</sub>, 400 MHz

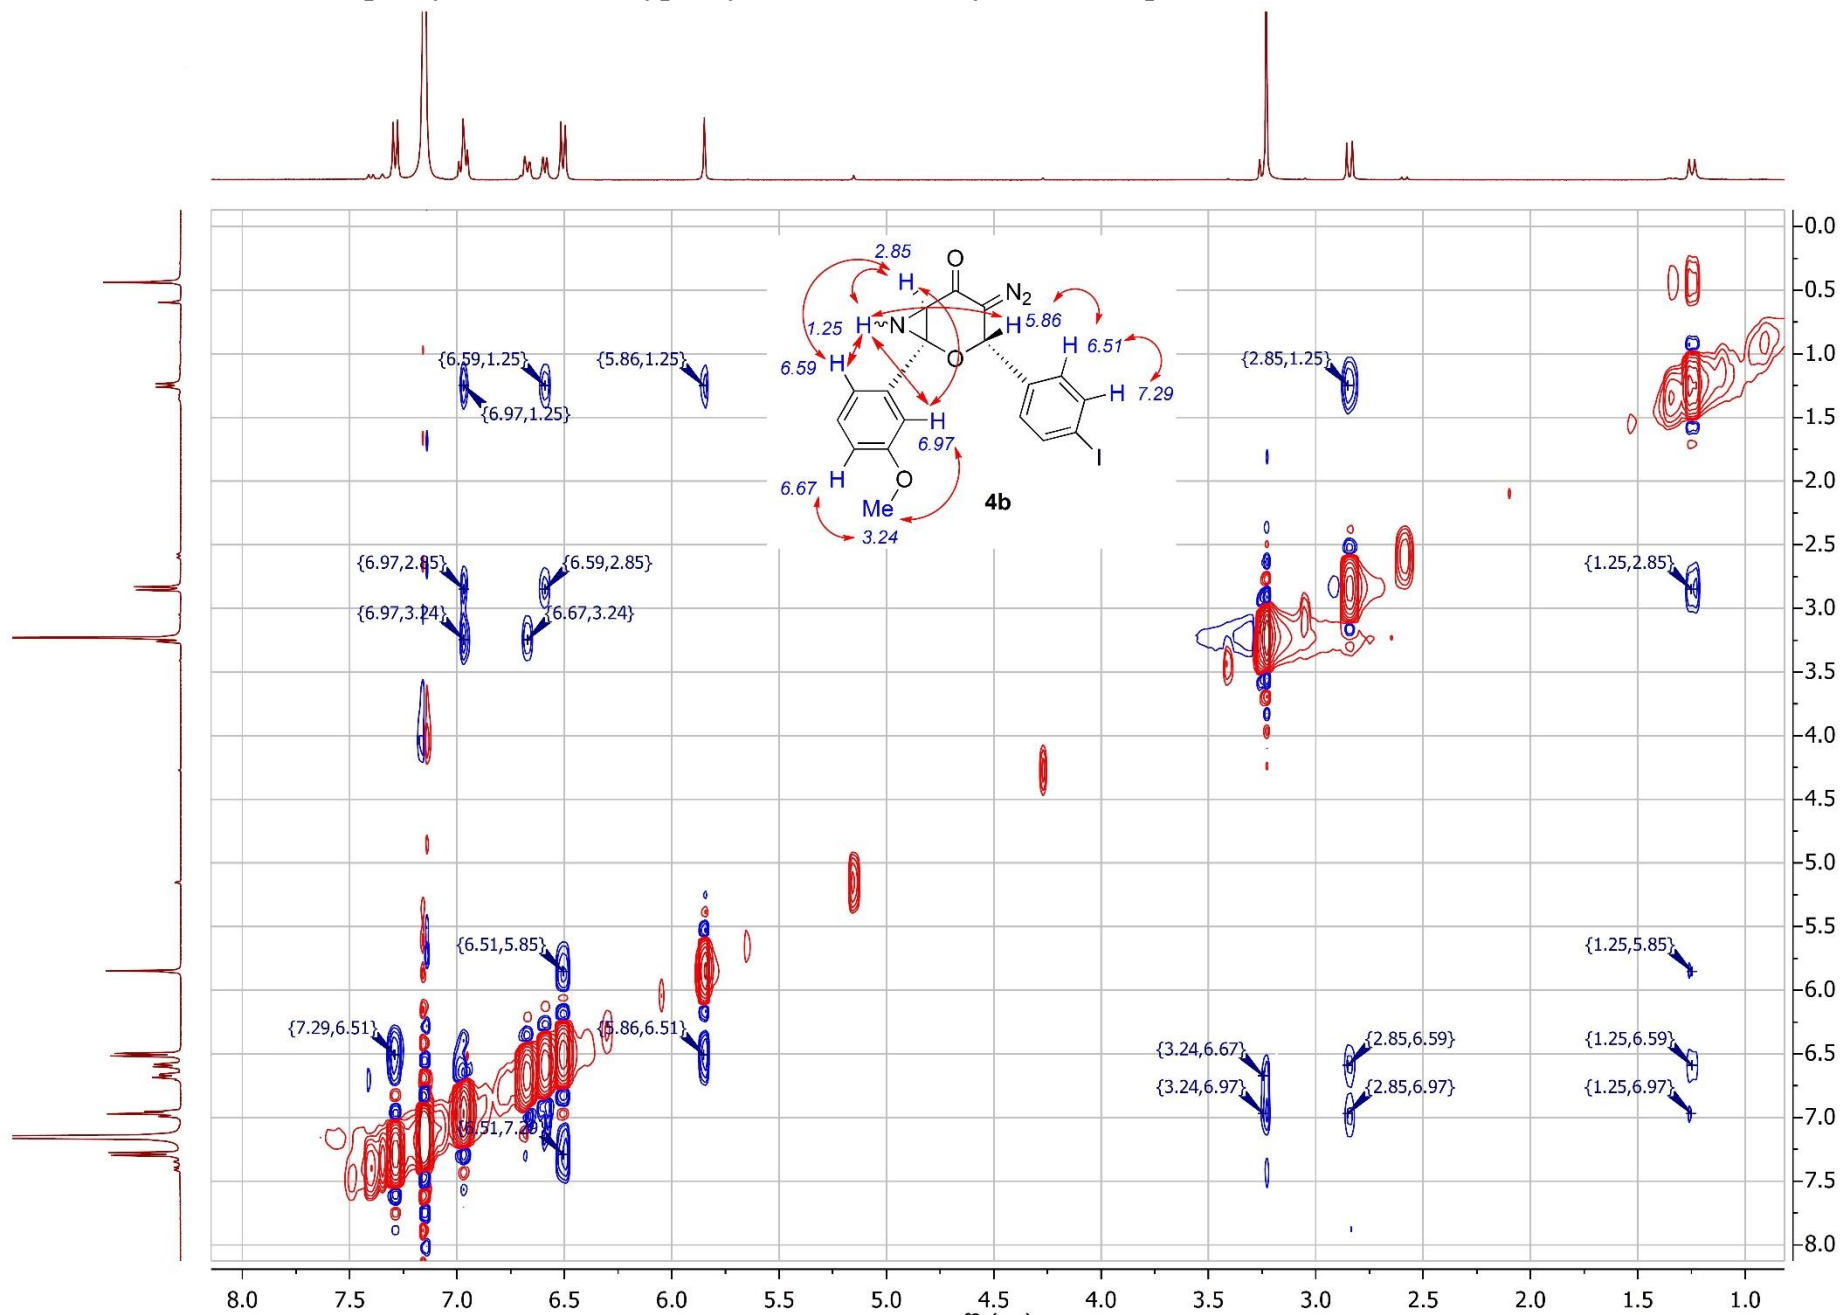

(5-(4-Fluorophenyl)-3-hydroxy-1H-pyrrol-2-yl)(phenyl)methanone (5a), <sup>1</sup>H NMR, CDCl<sub>3</sub>, 400 MHz

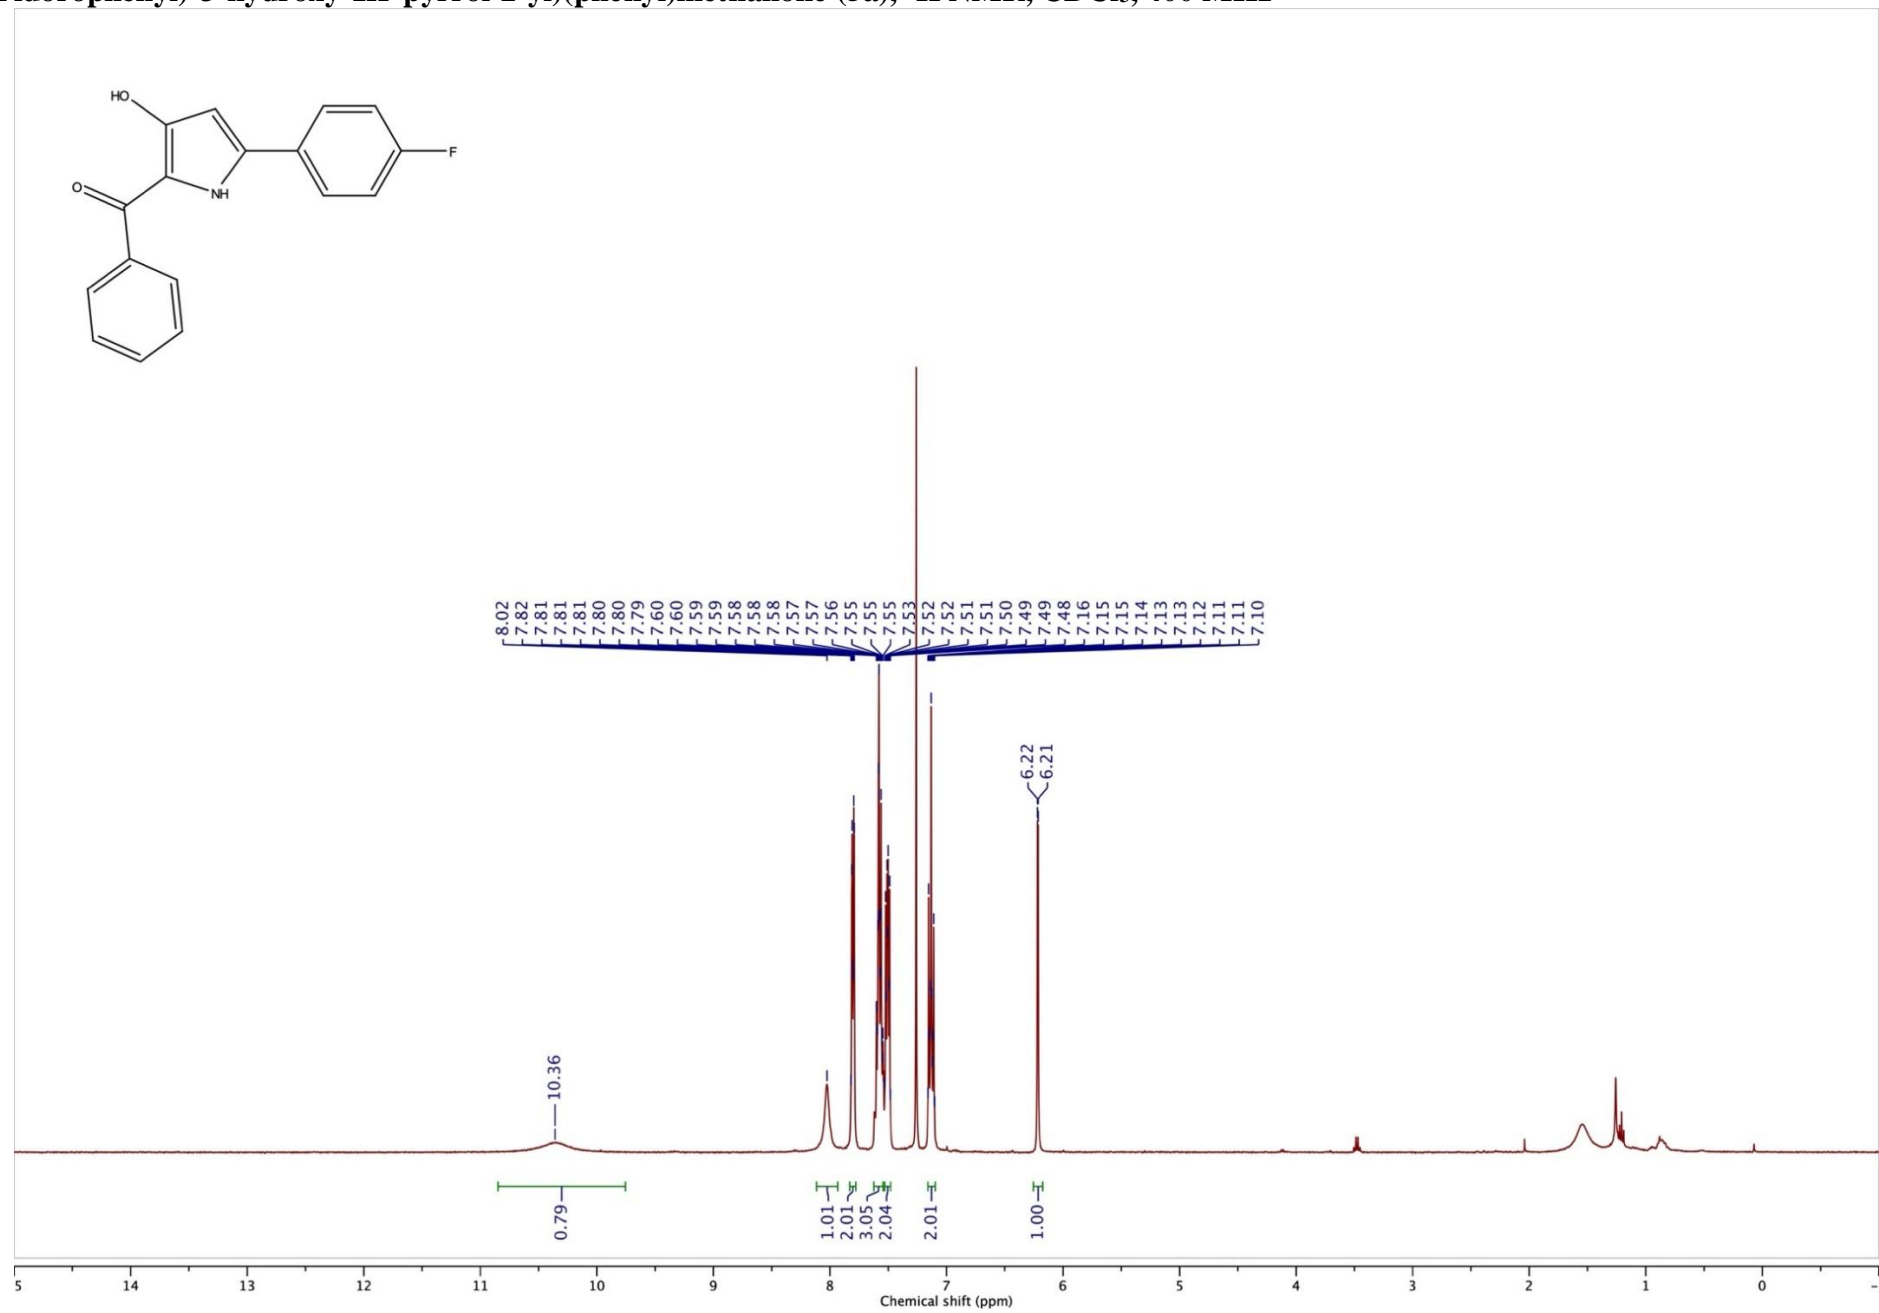

(5-(4-Fluorophenyl)-3-hydroxy-1H-pyrrol-2-yl)(phenyl)methanone (5a),  $^{13}\text{C}\{^1\text{H}\}$  NMR,  $\text{CDCl}_3$ , 100 MHz

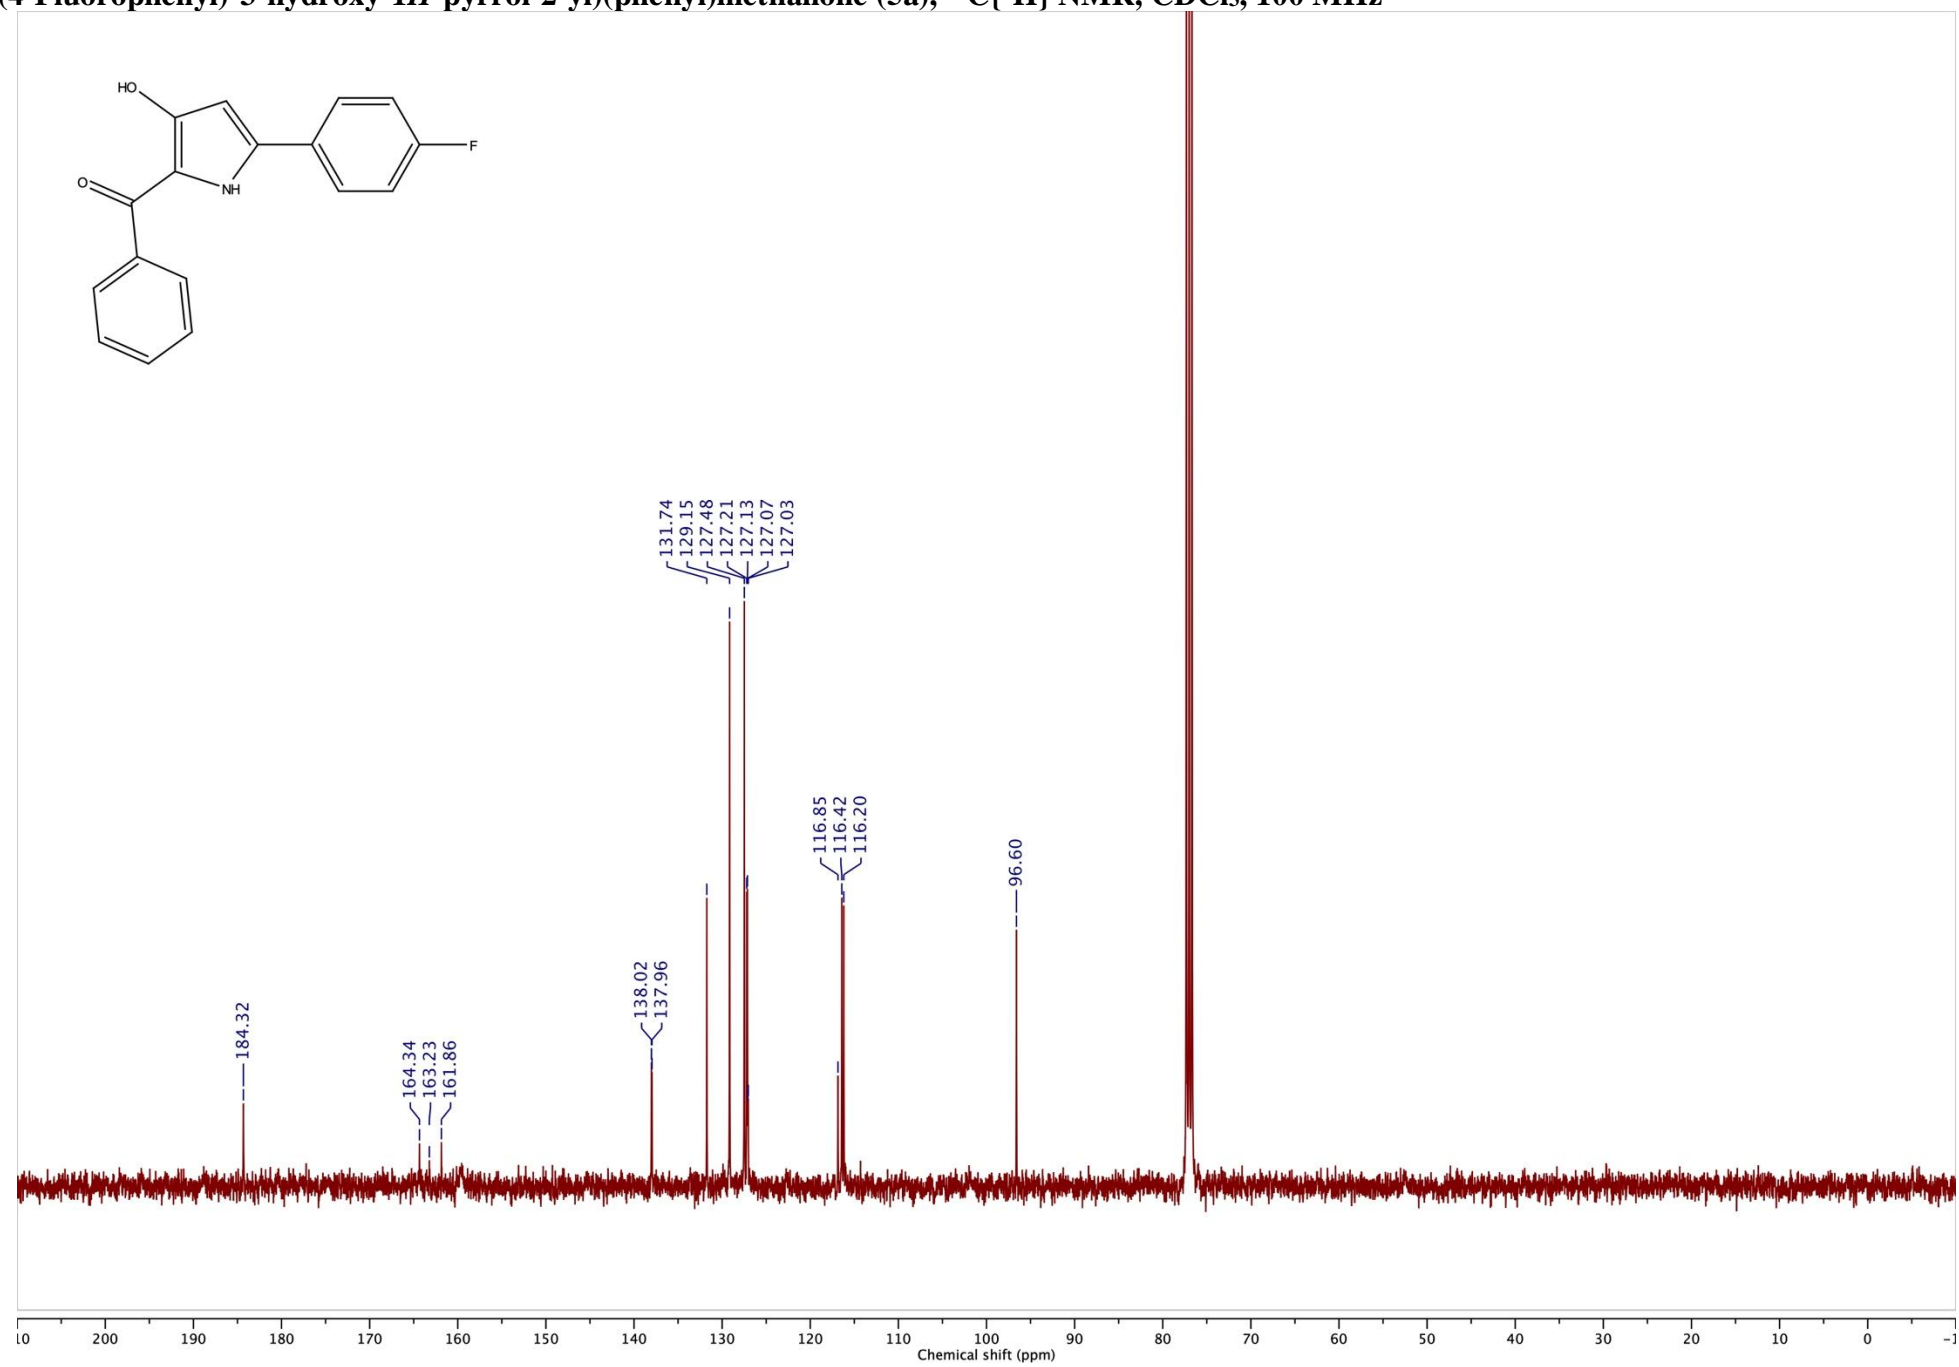

**(5-(4-Fluorophenyl)-3-hydroxy-1H-pyrrol-2-yl)(phenyl)methanone (5a), DEPT, CDCl<sub>3</sub>, 100 MHz**

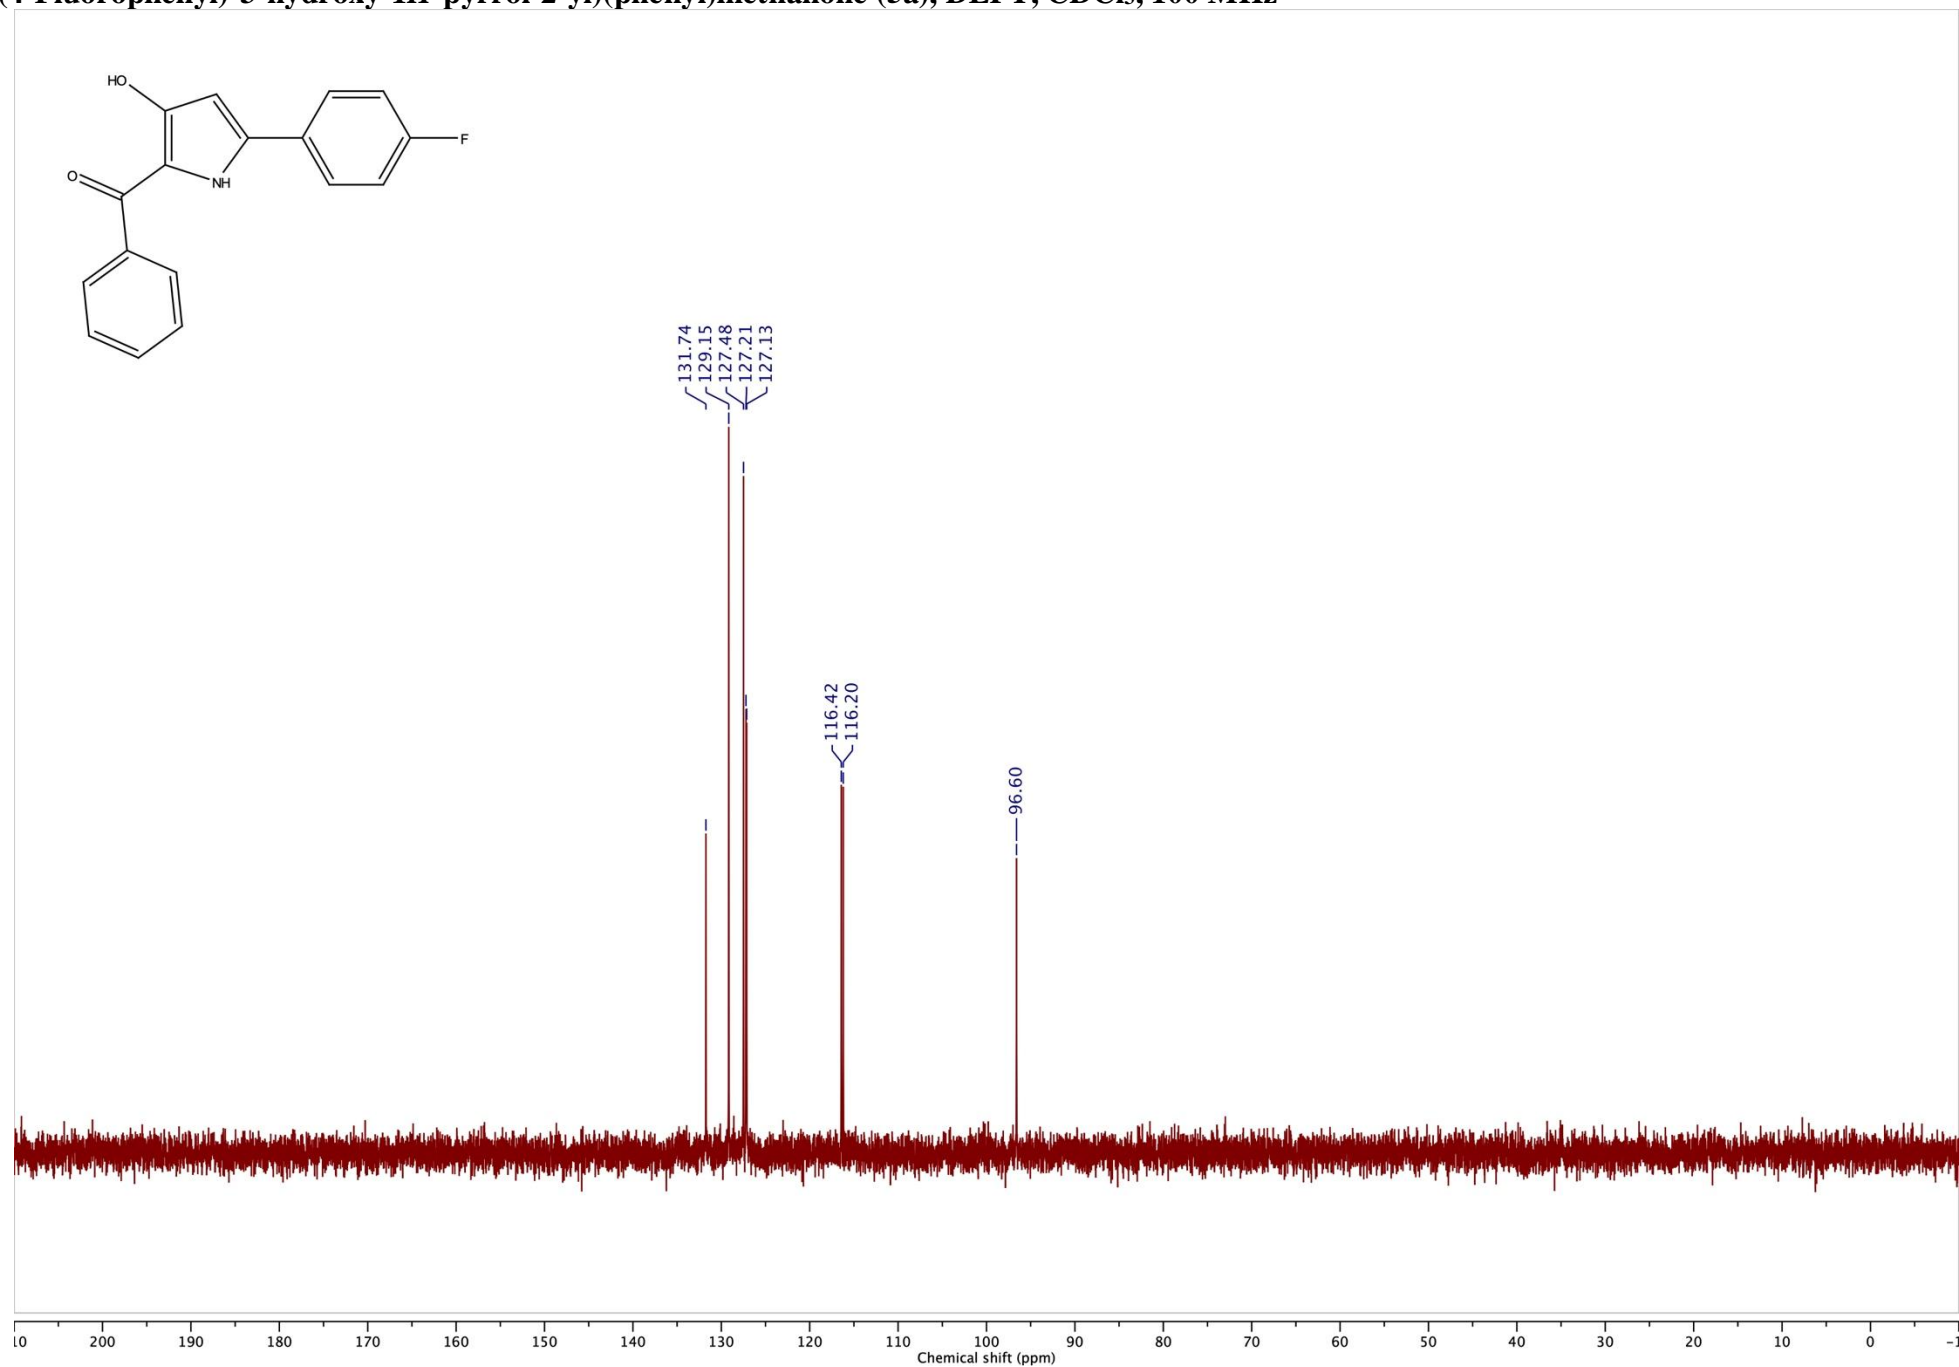

**(3-Hydroxy-5-(4-iodophenyl)-1H-pyrrol-2-yl)(3-methoxyphenyl)methanone (5b), <sup>1</sup>H NMR, CDCl<sub>3</sub>, 400 MHz**

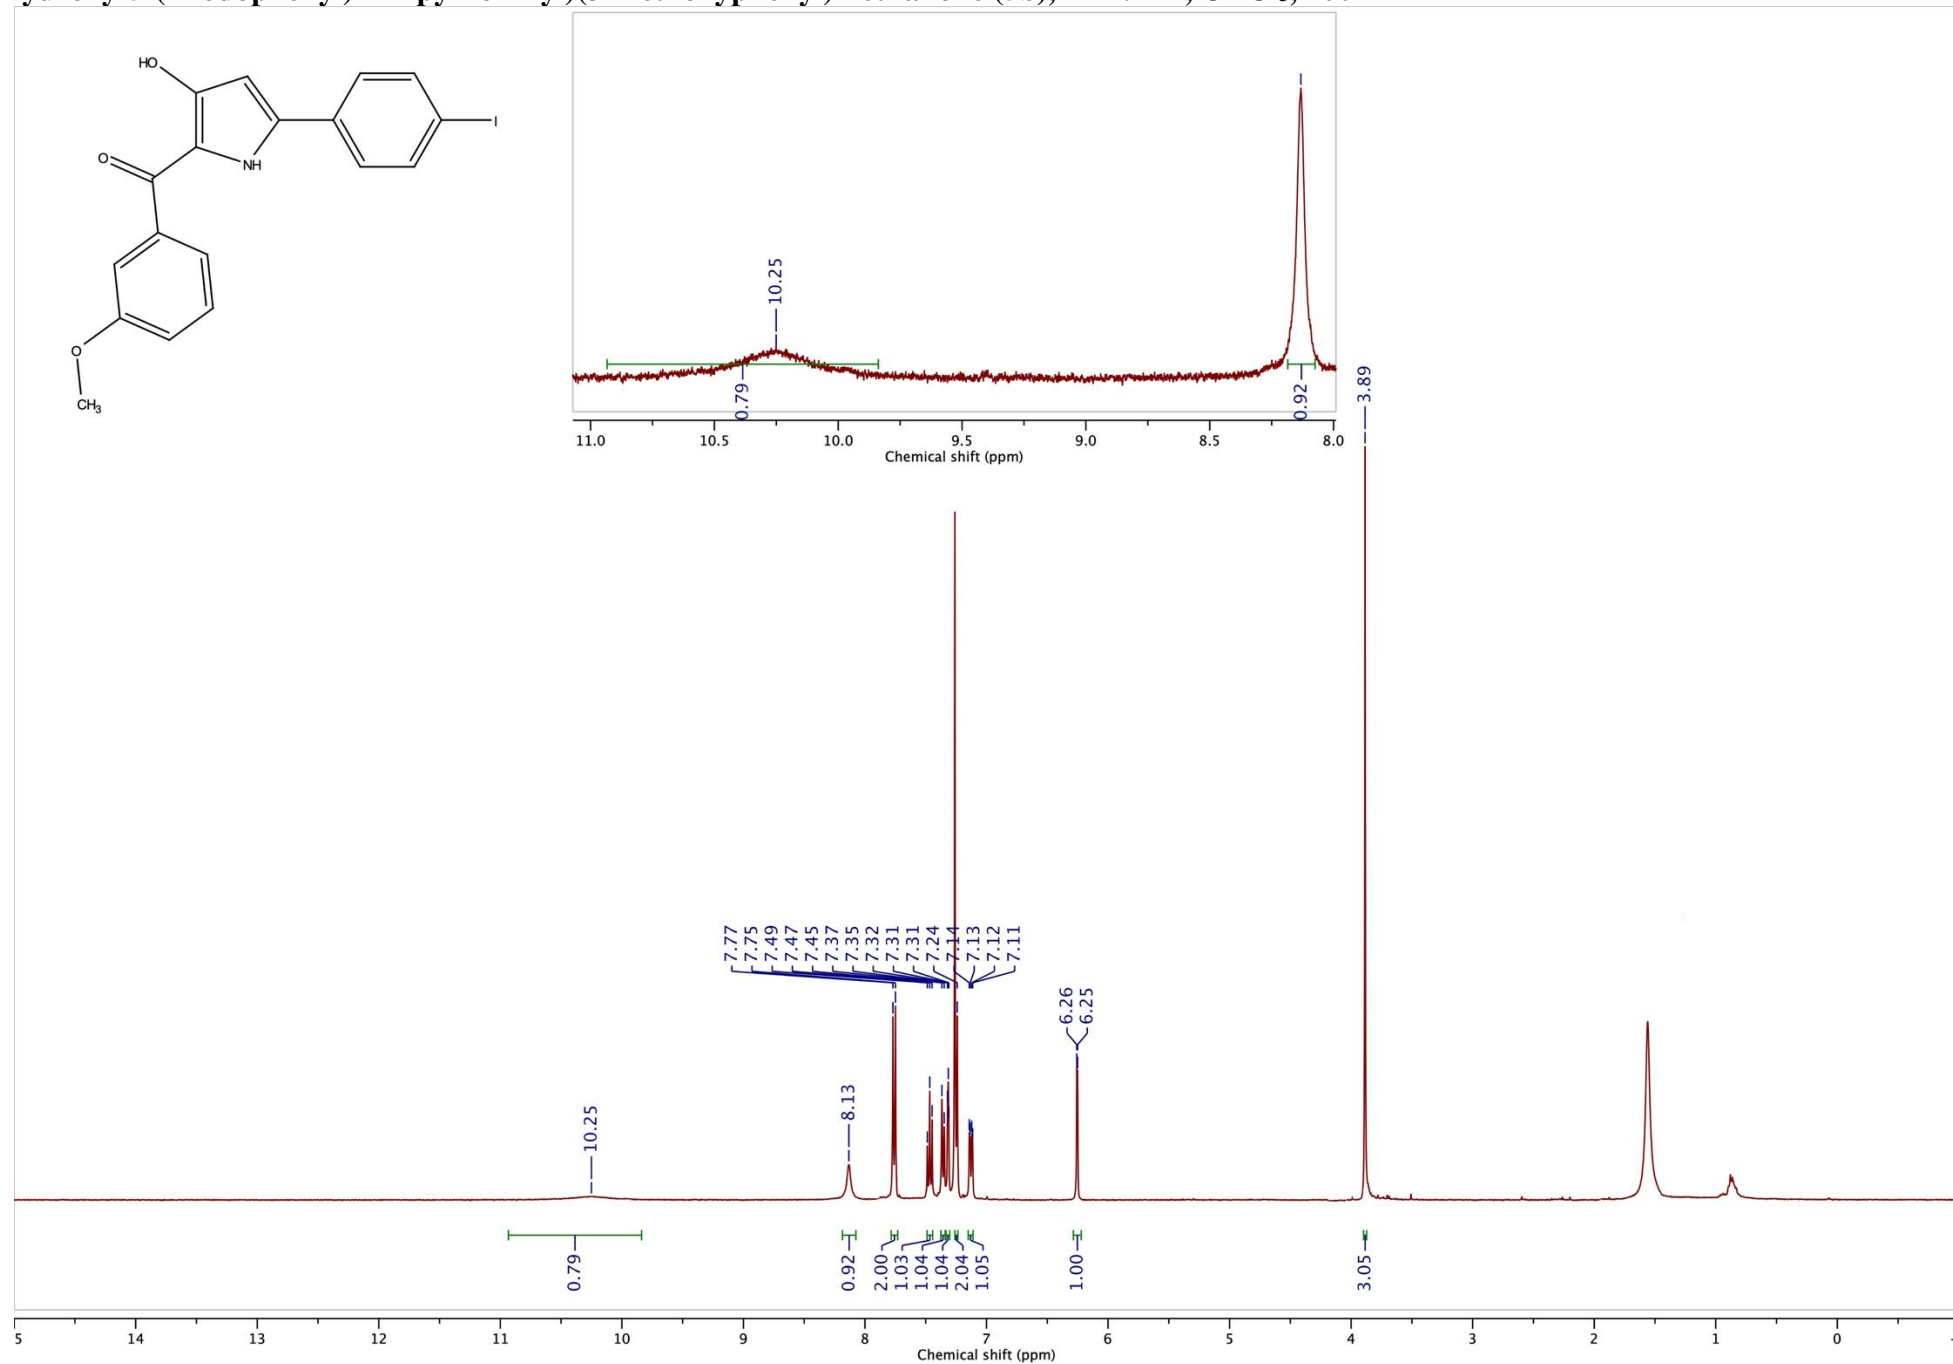

**(3-Hydroxy-5-(4-iodophenyl)-1H-pyrrol-2-yl)(3-methoxyphenyl)methanone (5b),  $^{13}\text{C}\{^1\text{H}\}$  NMR,  $\text{CDCl}_3$ , 100 MHz**

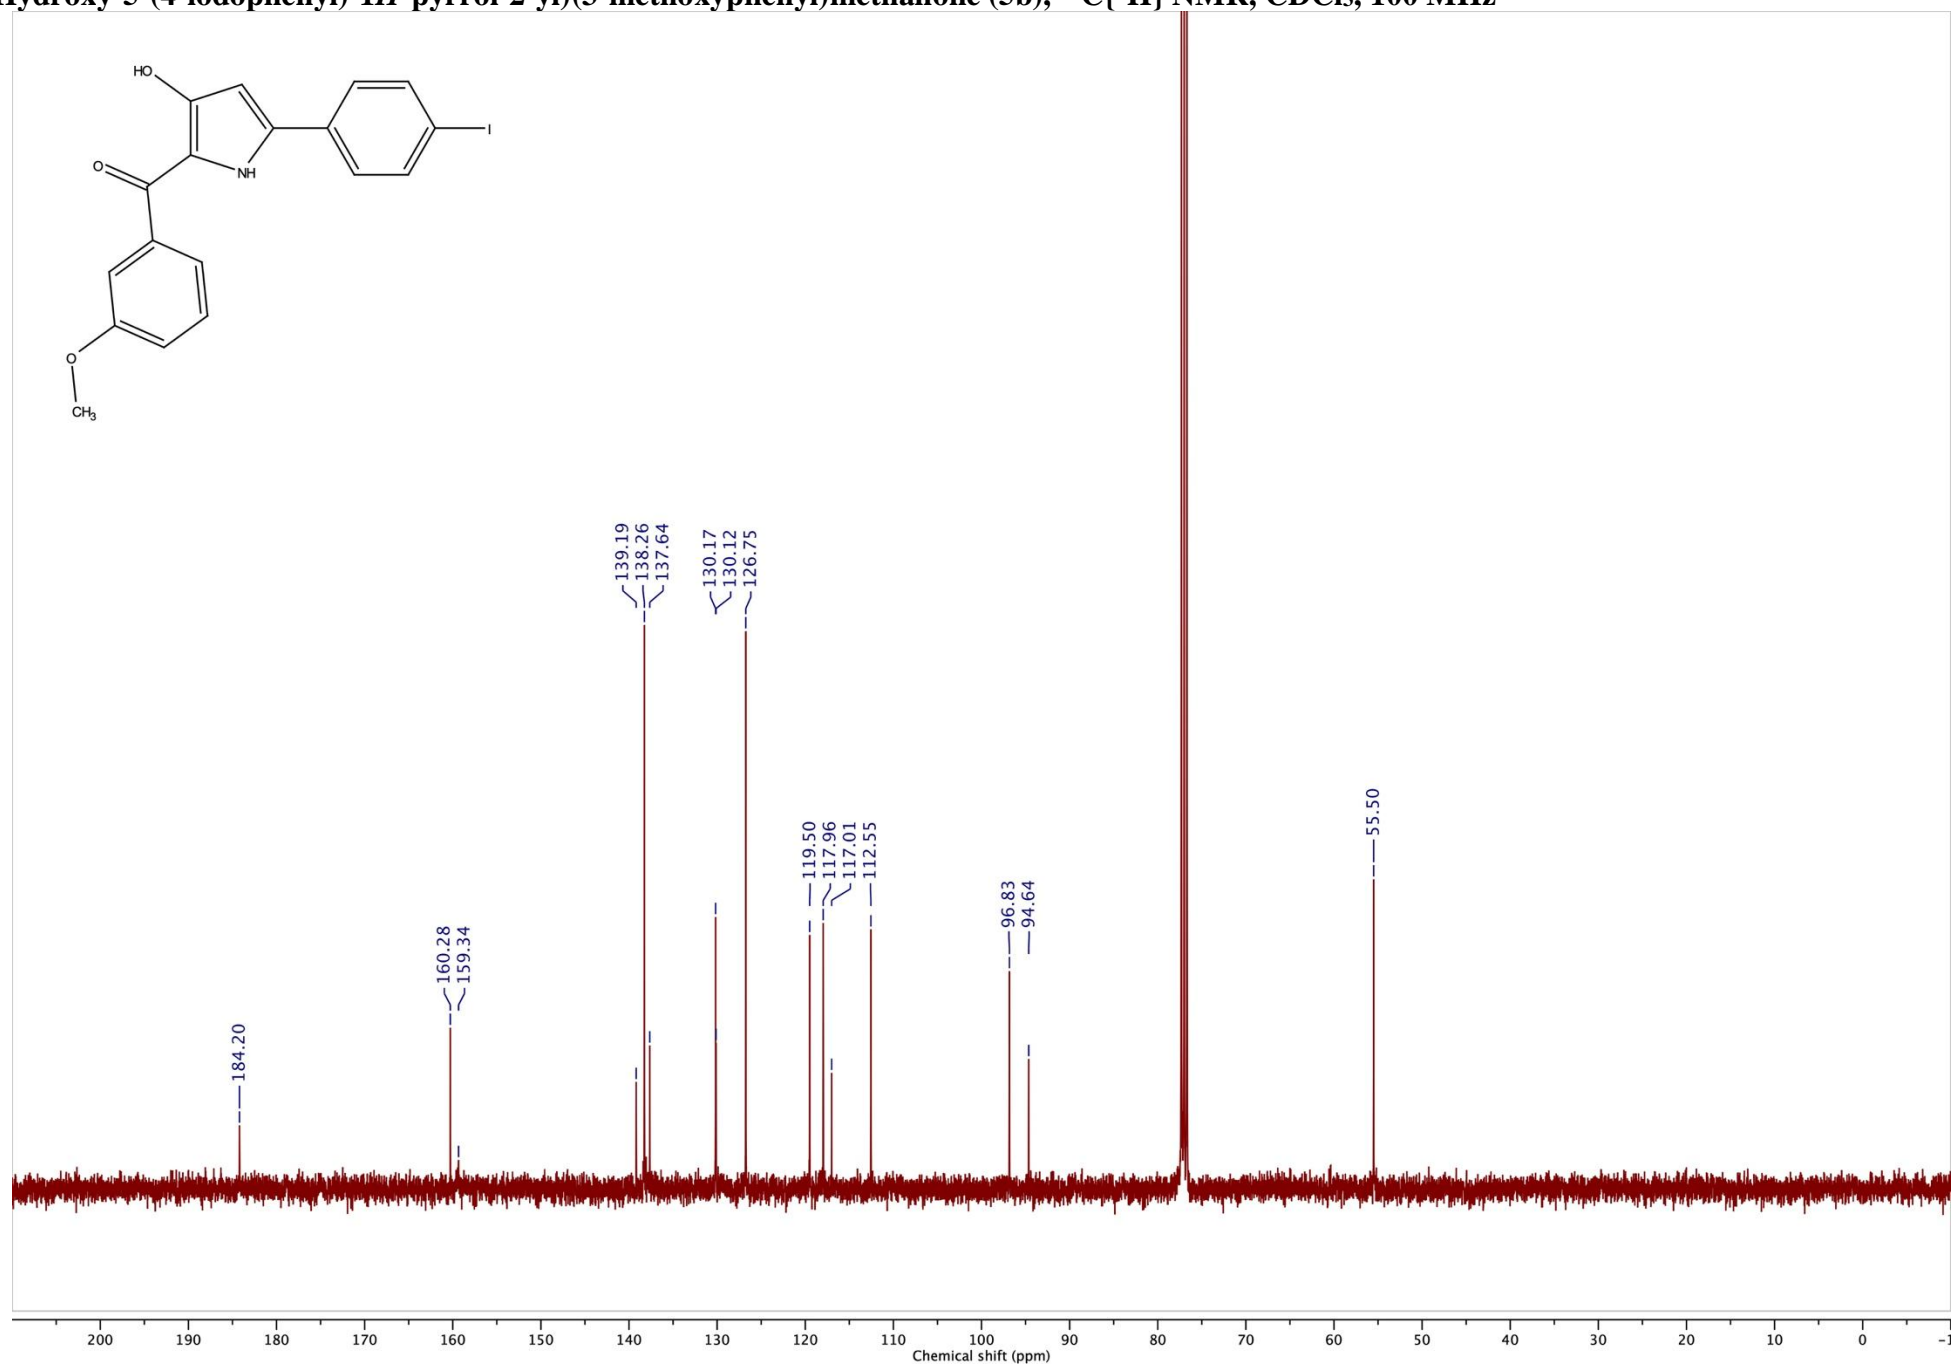

**(3-Hydroxy-5-(4-iodophenyl)-1H-pyrrol-2-yl)(3-methoxyphenyl)methanone (5b), DEPT, CDCl<sub>3</sub>, 100 MHz**

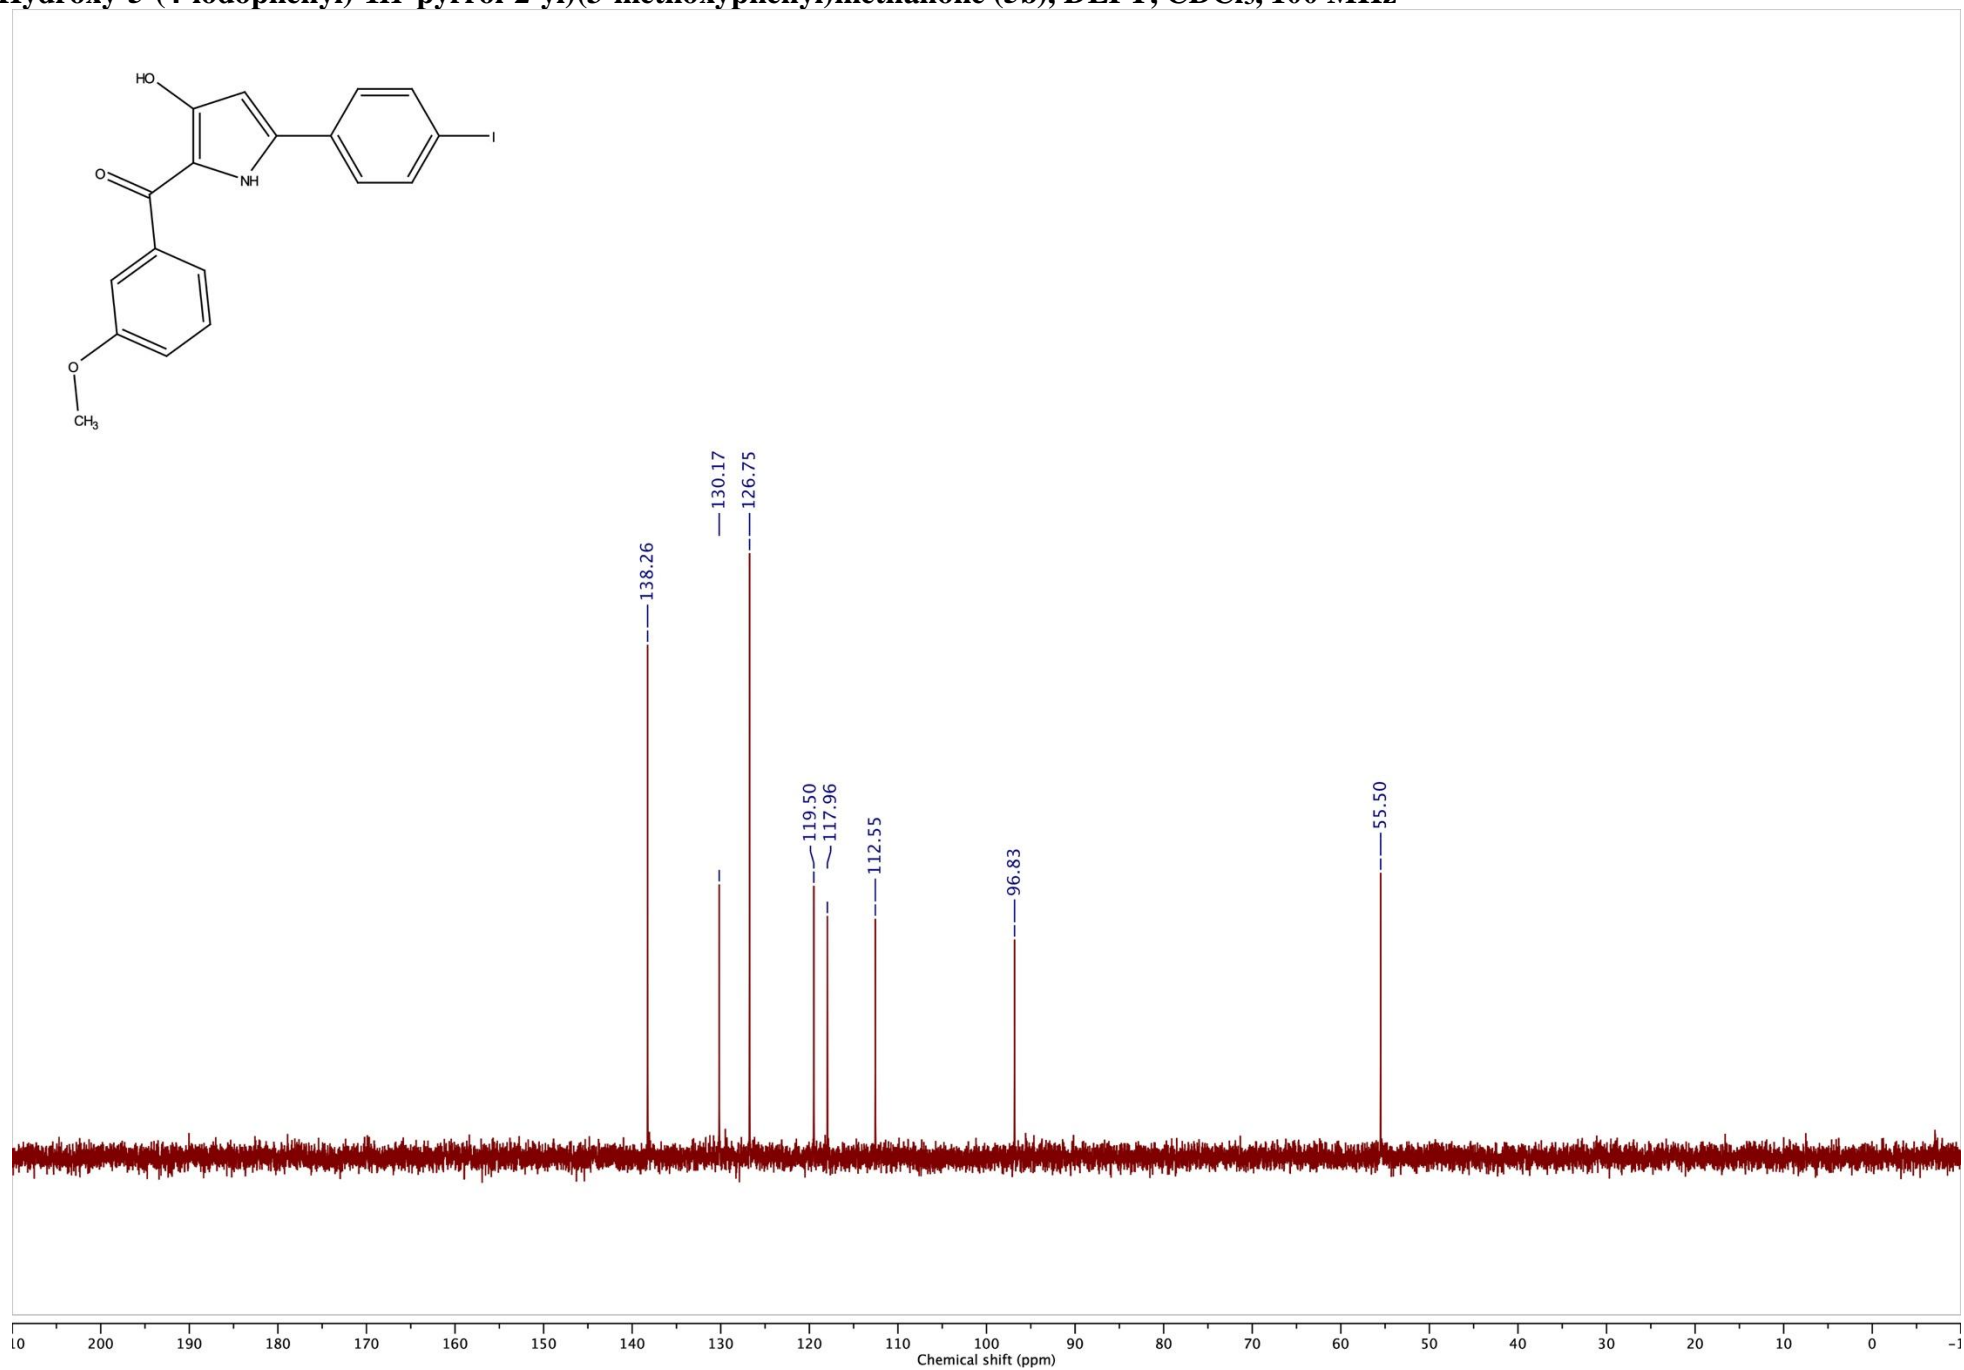

(3-Hydroxy-5-(naphthalen-1-yl)-1H-pyrrol-2-yl)(4-methoxyphenyl)methanone (5c), <sup>1</sup>H NMR, CDCl<sub>3</sub>, 400 MHz

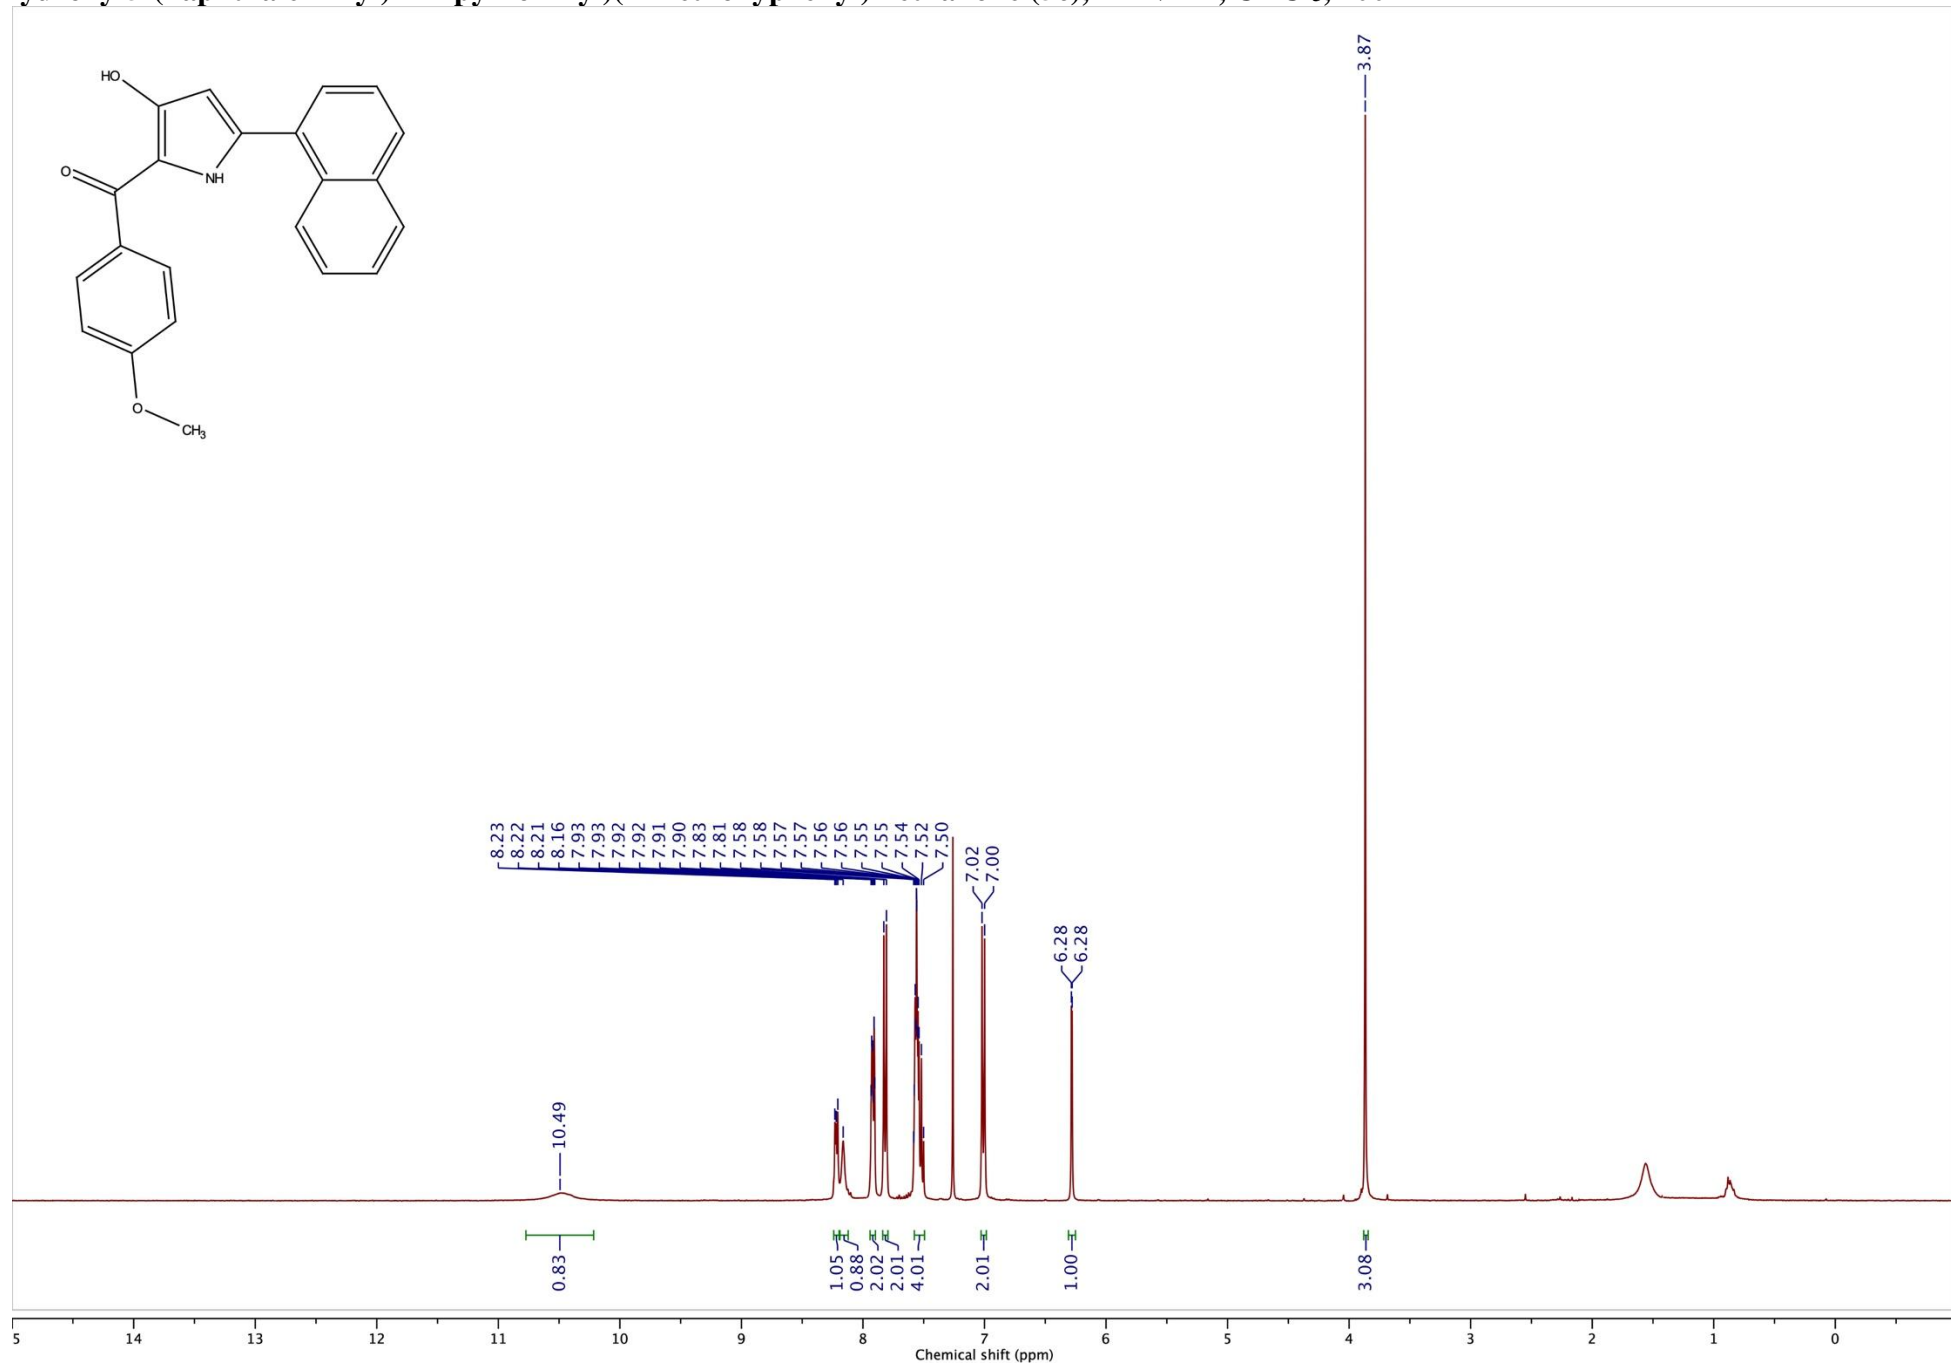

(3-Hydroxy-5-(naphthalen-1-yl)-1H-pyrrol-2-yl)(4-methoxyphenyl)methanone (5c),  $^{13}\text{C}\{^1\text{H}\}$  NMR,  $\text{CDCl}_3$ , 100 MHz

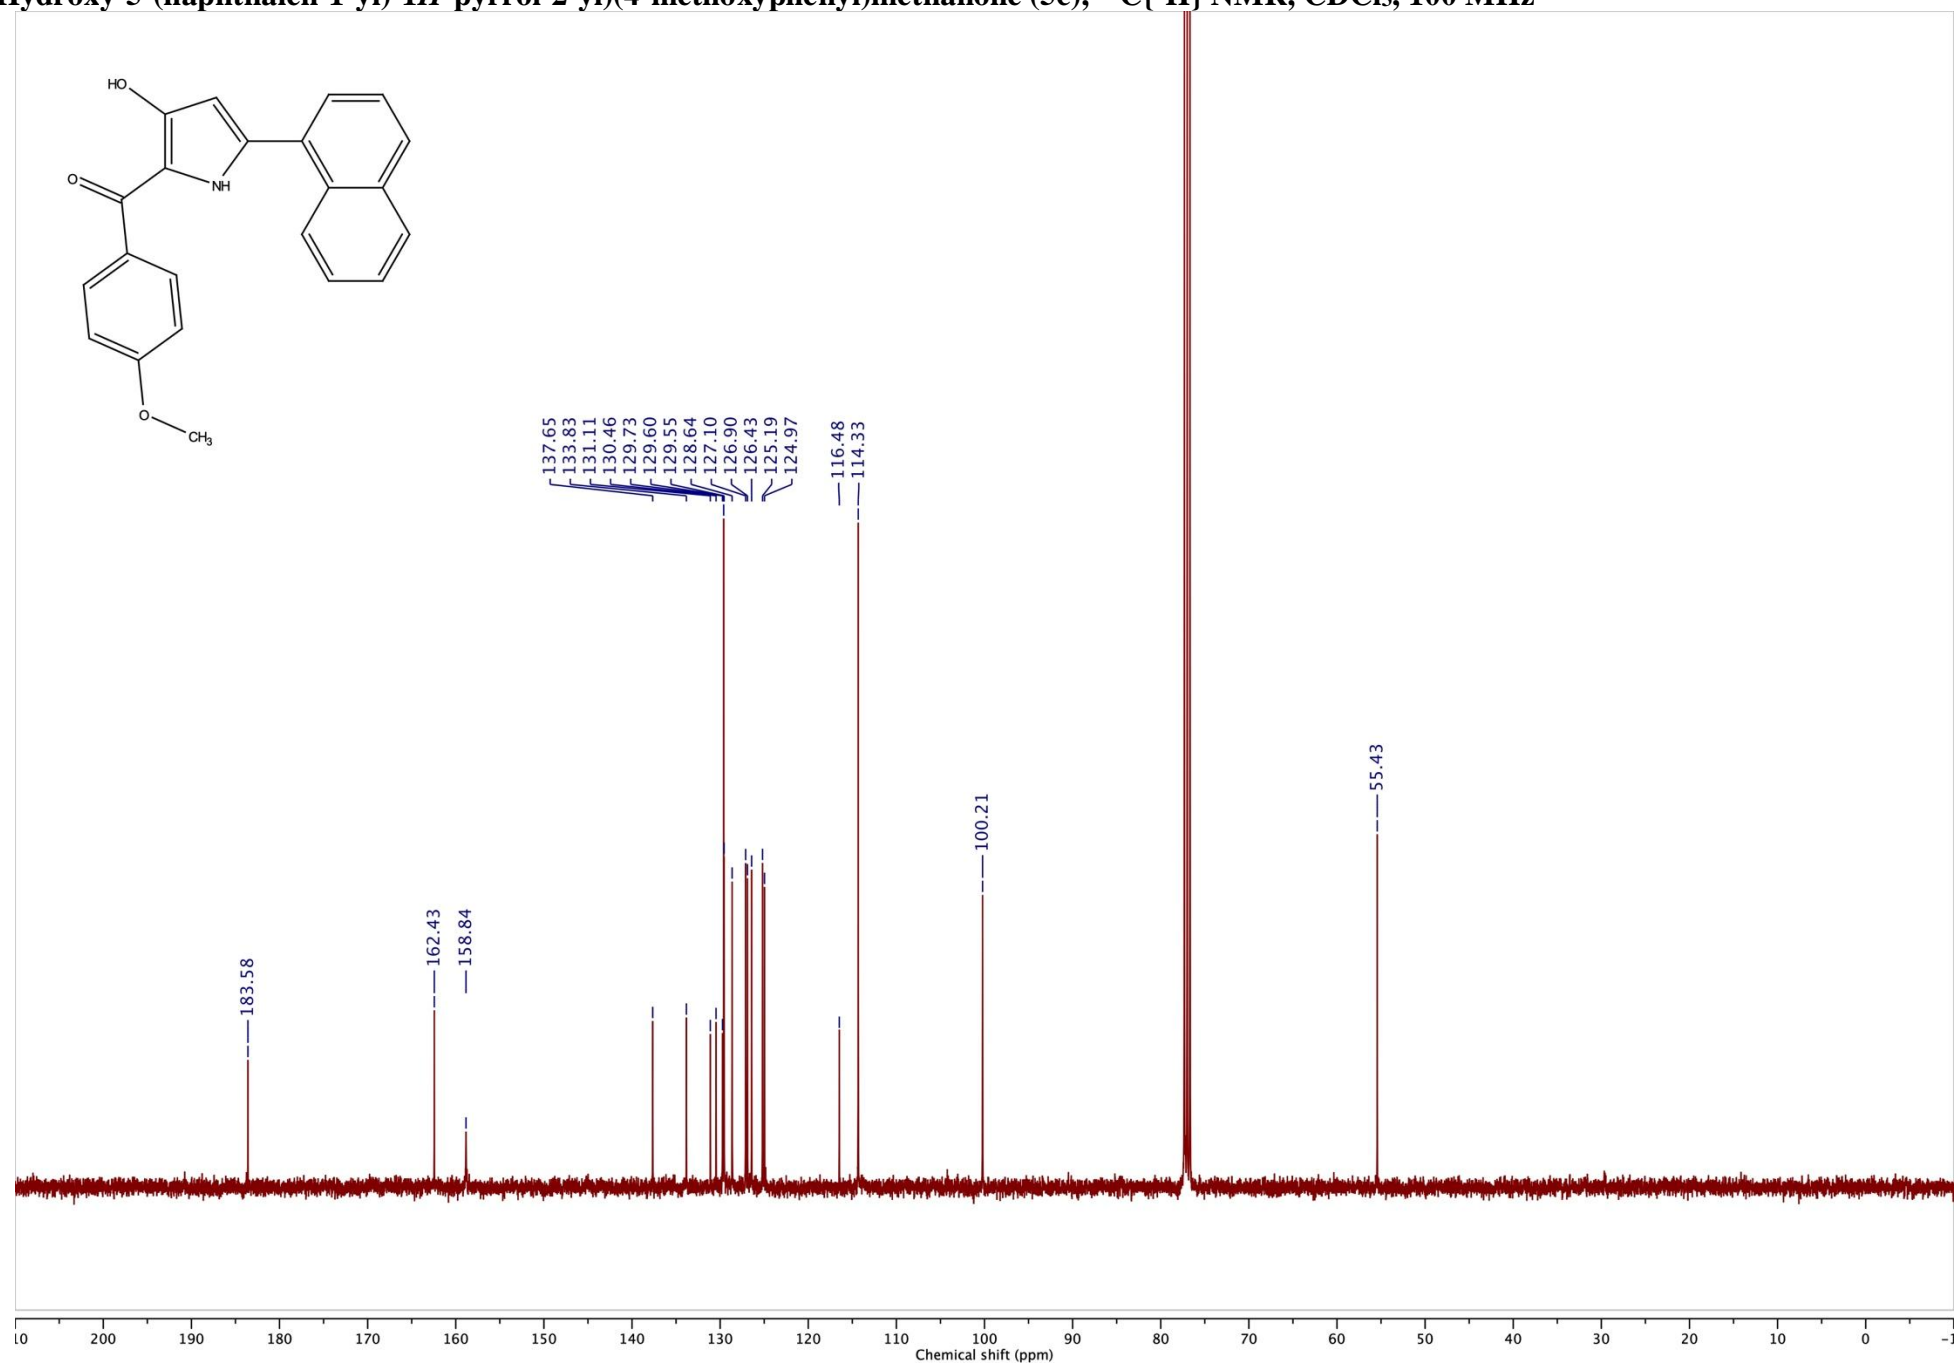

**(3-Hydroxy-5-(naphthalen-1-yl)-1H-pyrrol-2-yl)(4-methoxyphenyl)methanone (5c), DEPT, CDCl<sub>3</sub>, 100 MHz**

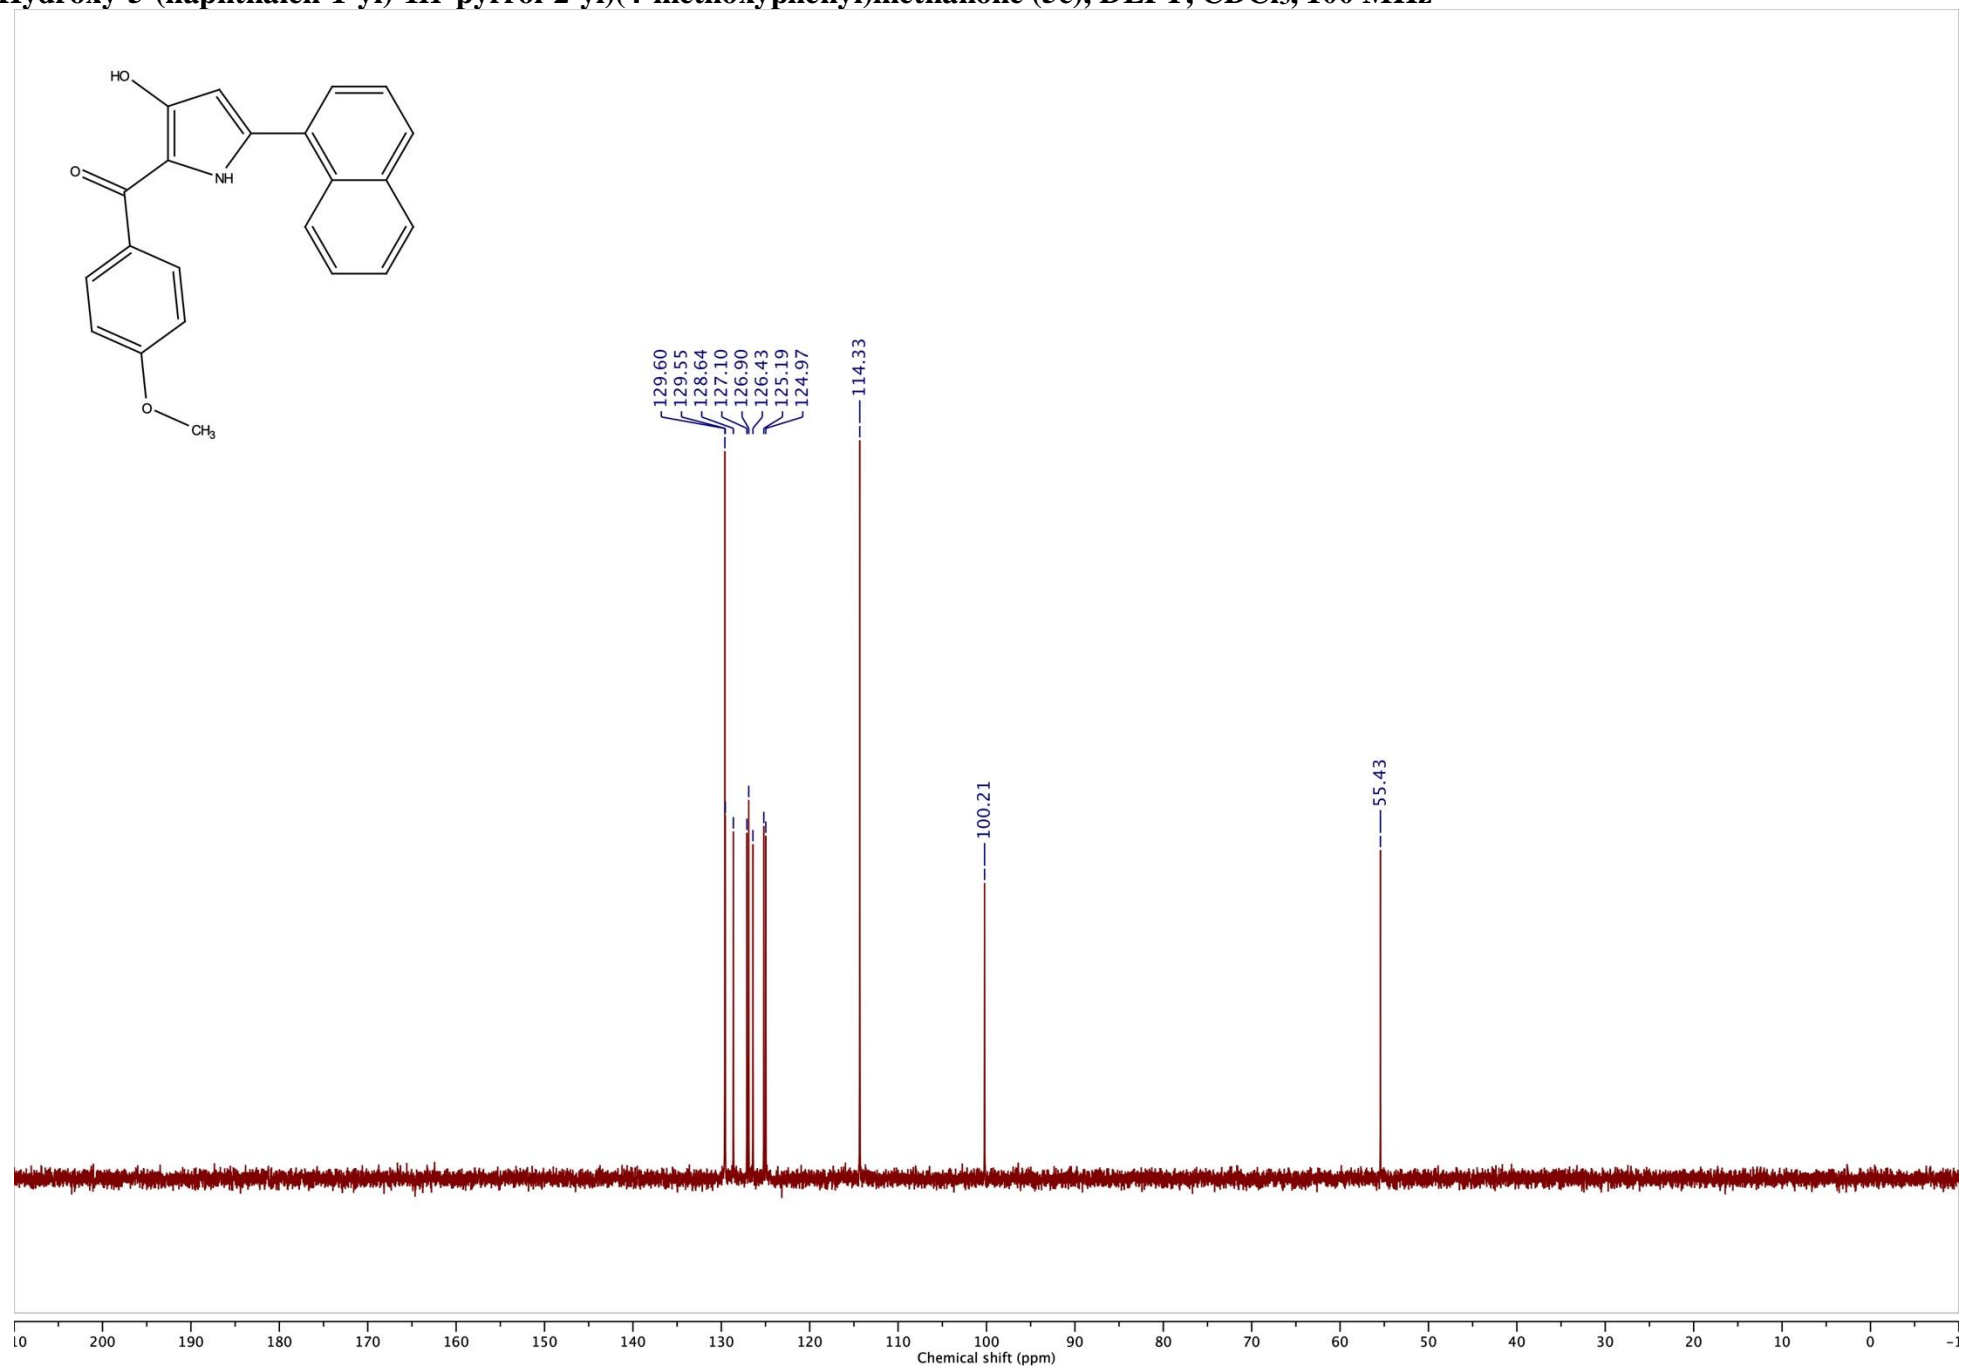

(3-Hydroxy-5-(thiophen-2-yl)-1H-pyrrol-2-yl)(4-methoxyphenyl)methanone (5d), <sup>1</sup>H NMR, CDCl<sub>3</sub>, 400 MHz

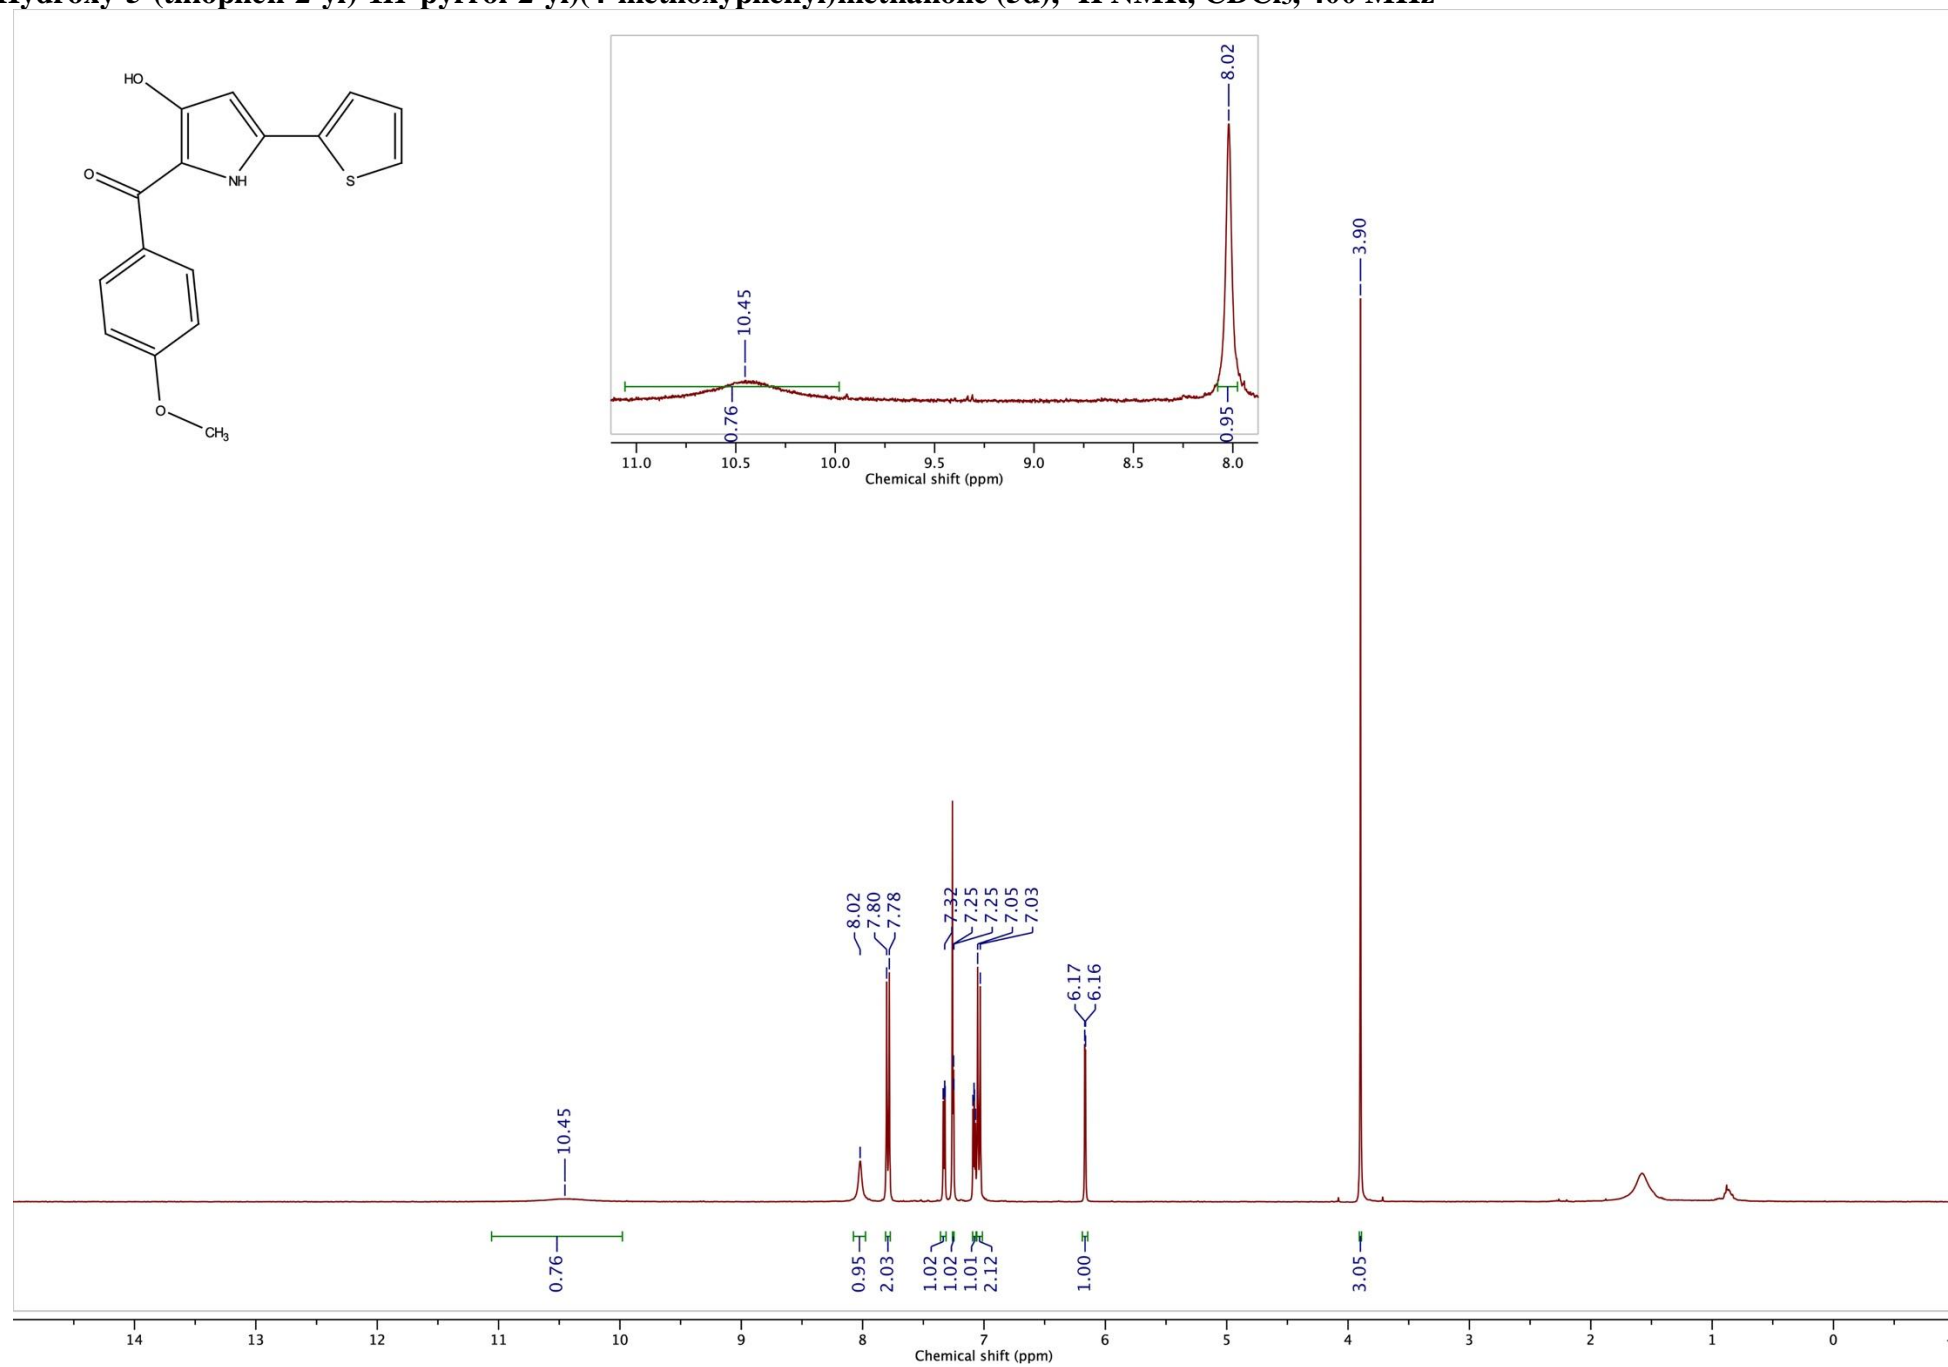

(3-Hydroxy-5-(thiophen-2-yl)-1H-pyrrol-2-yl)(4-methoxyphenyl)methanone (5d),  $^{13}\text{C}\{^1\text{H}\}$  NMR,  $\text{CDCl}_3$ , 100 MHz

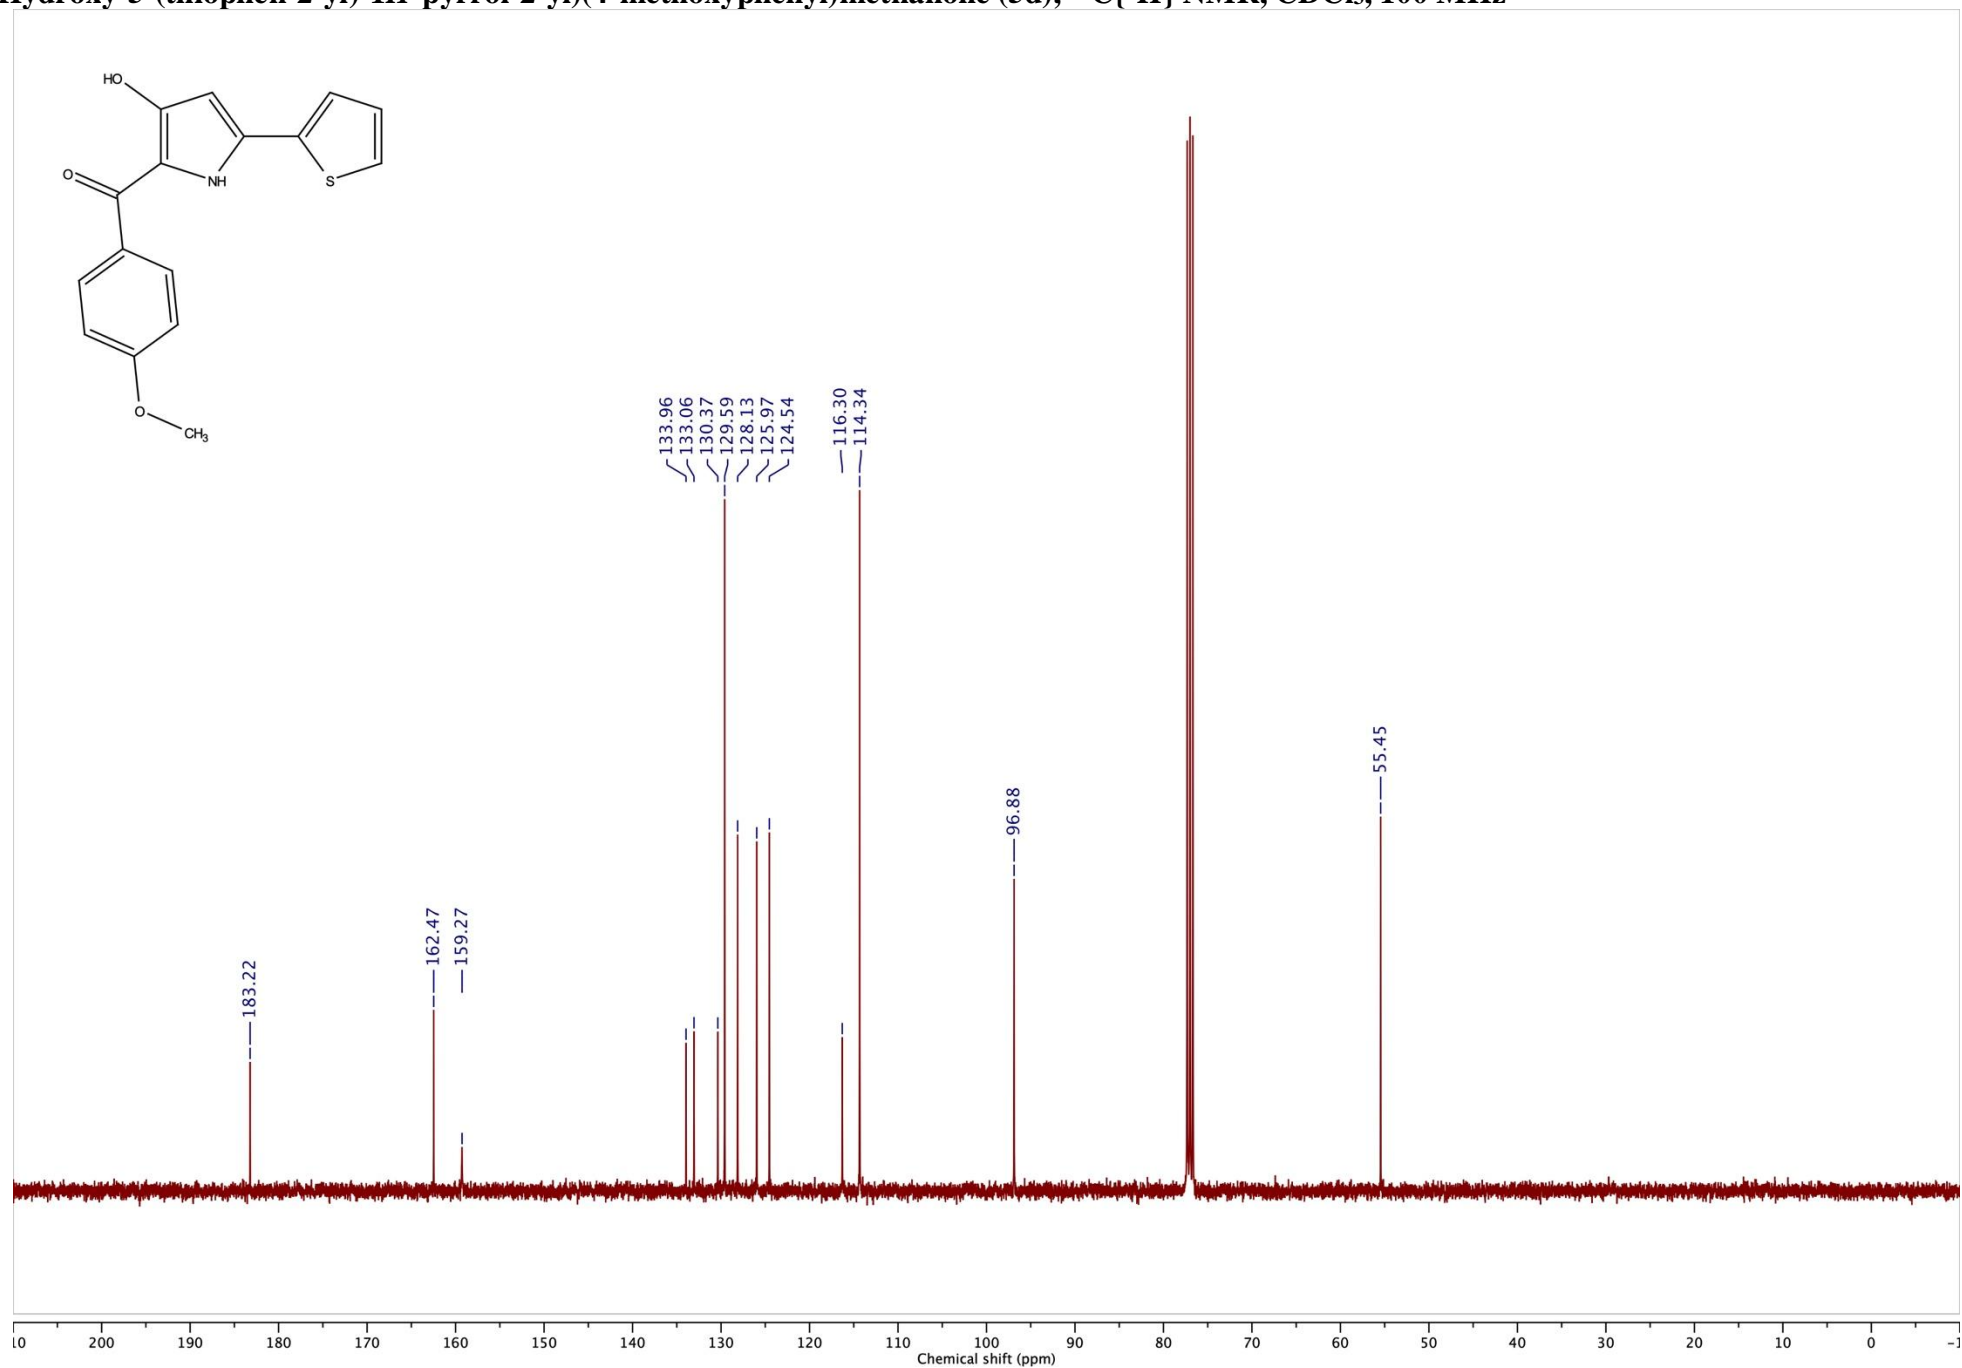

**(3-Hydroxy-5-(thiophen-2-yl)-1H-pyrrol-2-yl)(4-methoxyphenyl)methanone (5d), DEPT, CDCl<sub>3</sub>, 100 MHz**

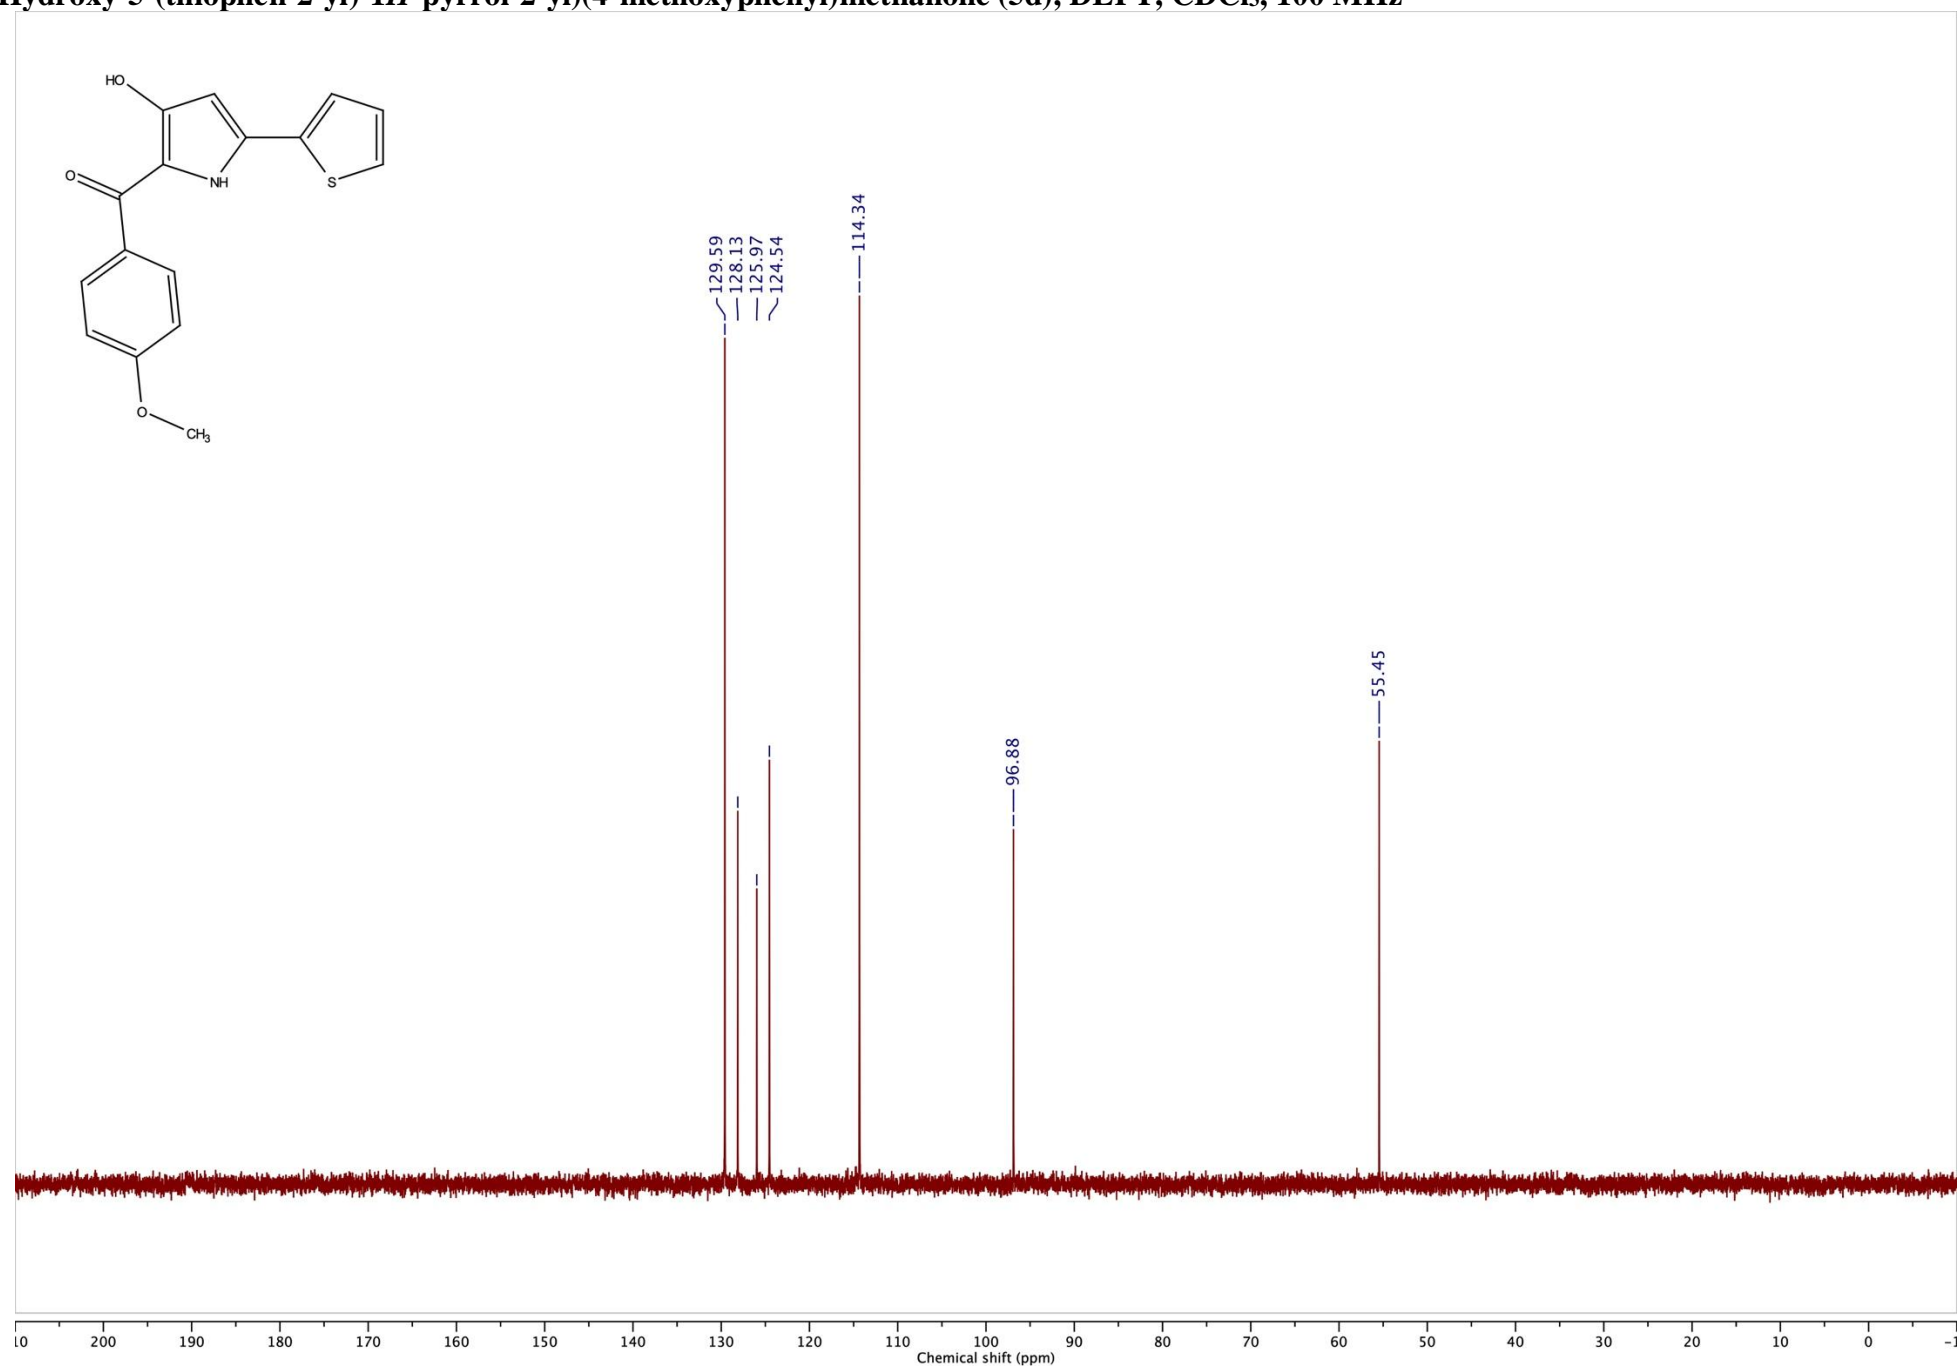

**(5-(4-Chlorophenyl)-3-hydroxy-1H-pyrrol-2-yl)(3,4-dimethoxyphenyl)methanone (5e), <sup>1</sup>H NMR, DMSO-*d*<sub>6</sub>, 400 MHz**

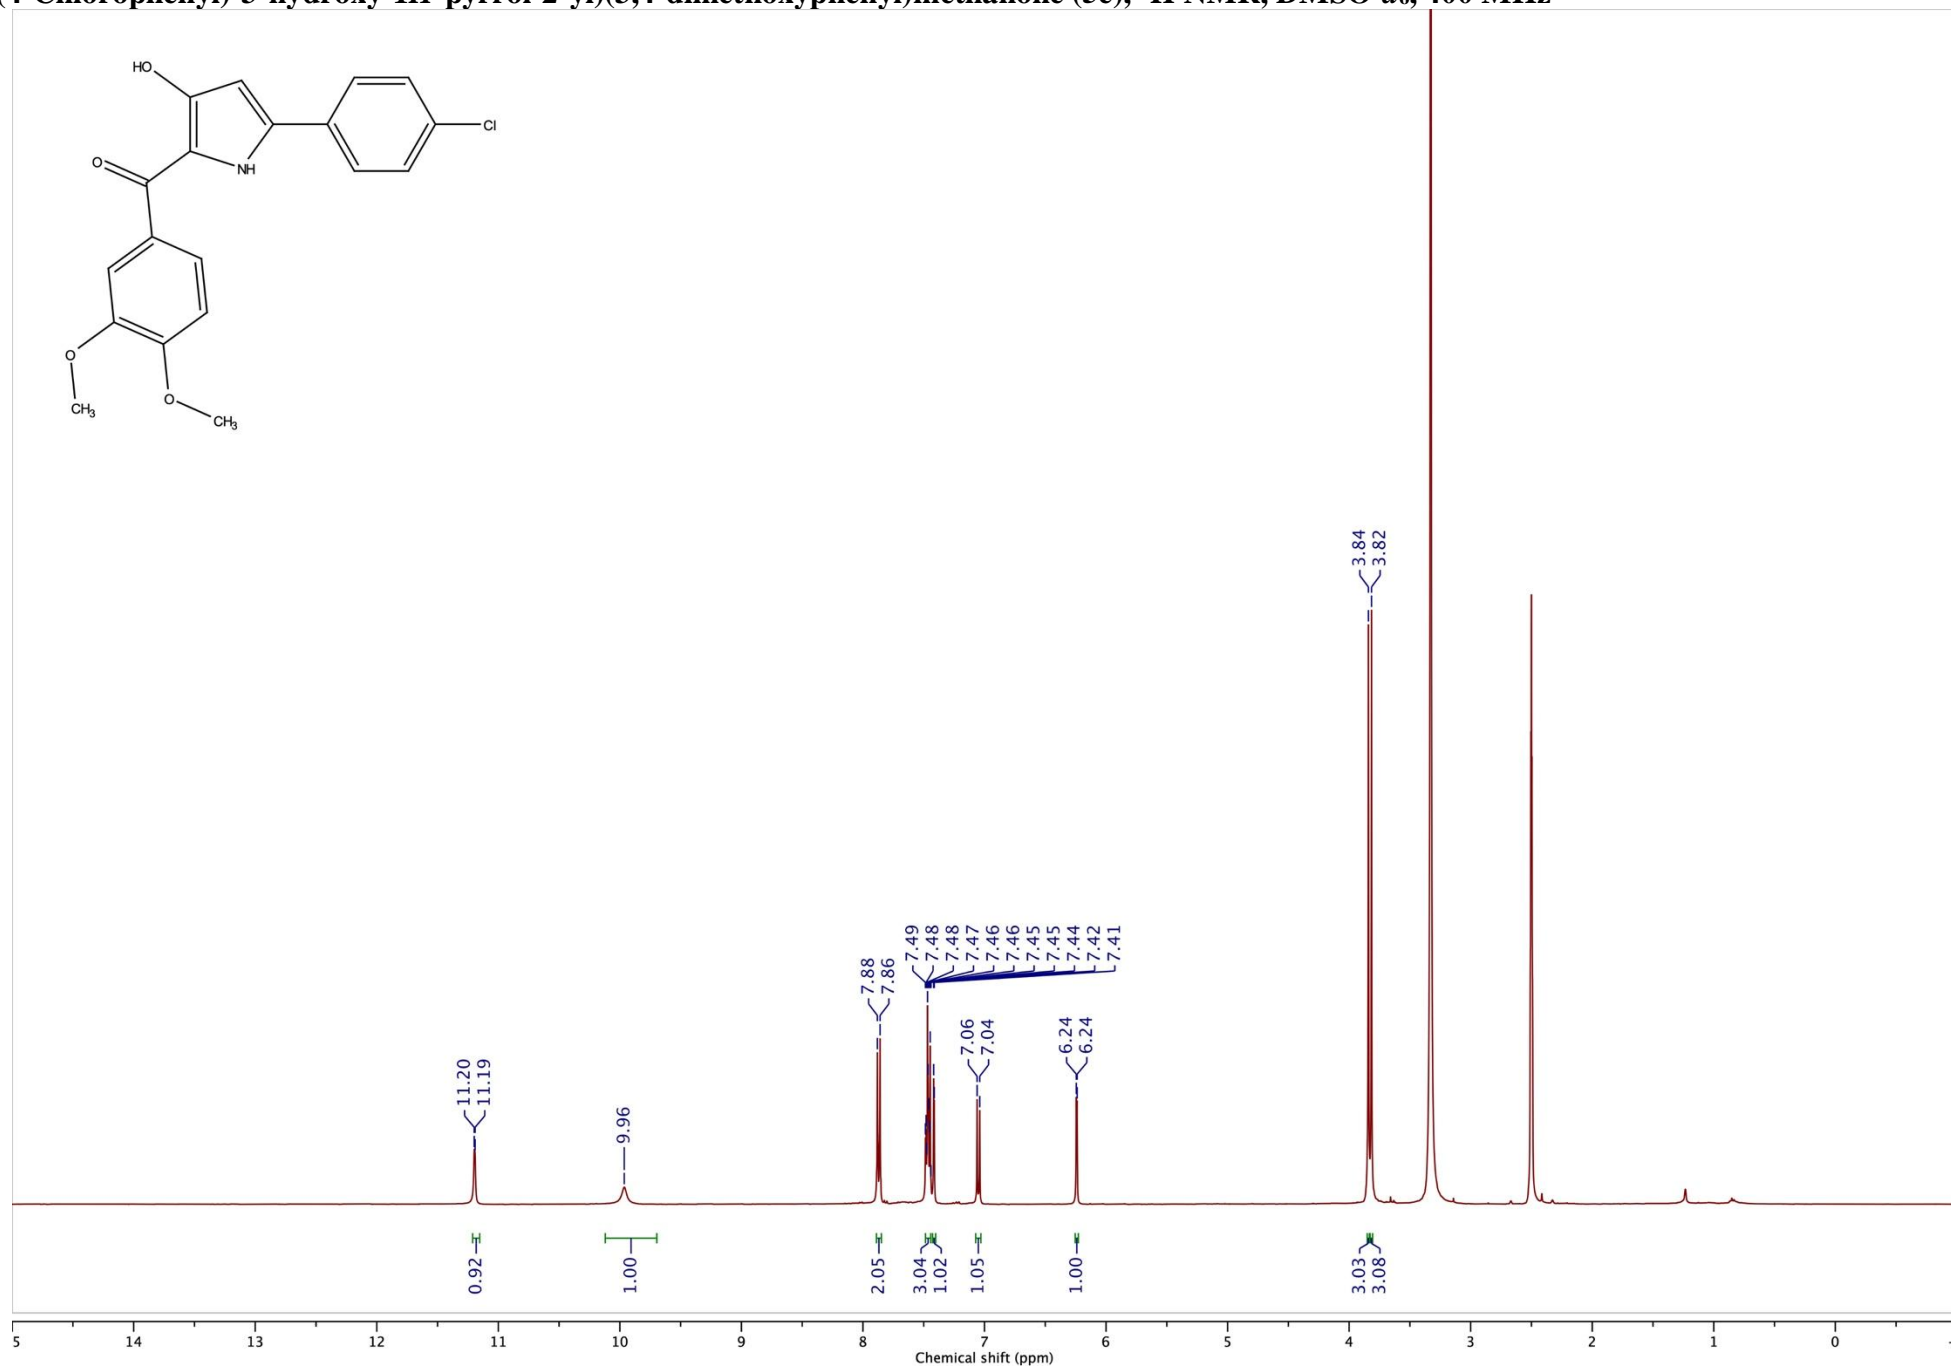

(5-(4-Chlorophenyl)-3-hydroxy-1H-pyrrol-2-yl)(3,4-dimethoxyphenyl)methanone (5e),  $^{13}\text{C}\{^1\text{H}\}$  NMR,  $\text{DMSO-}d_6$ , 100 MHz

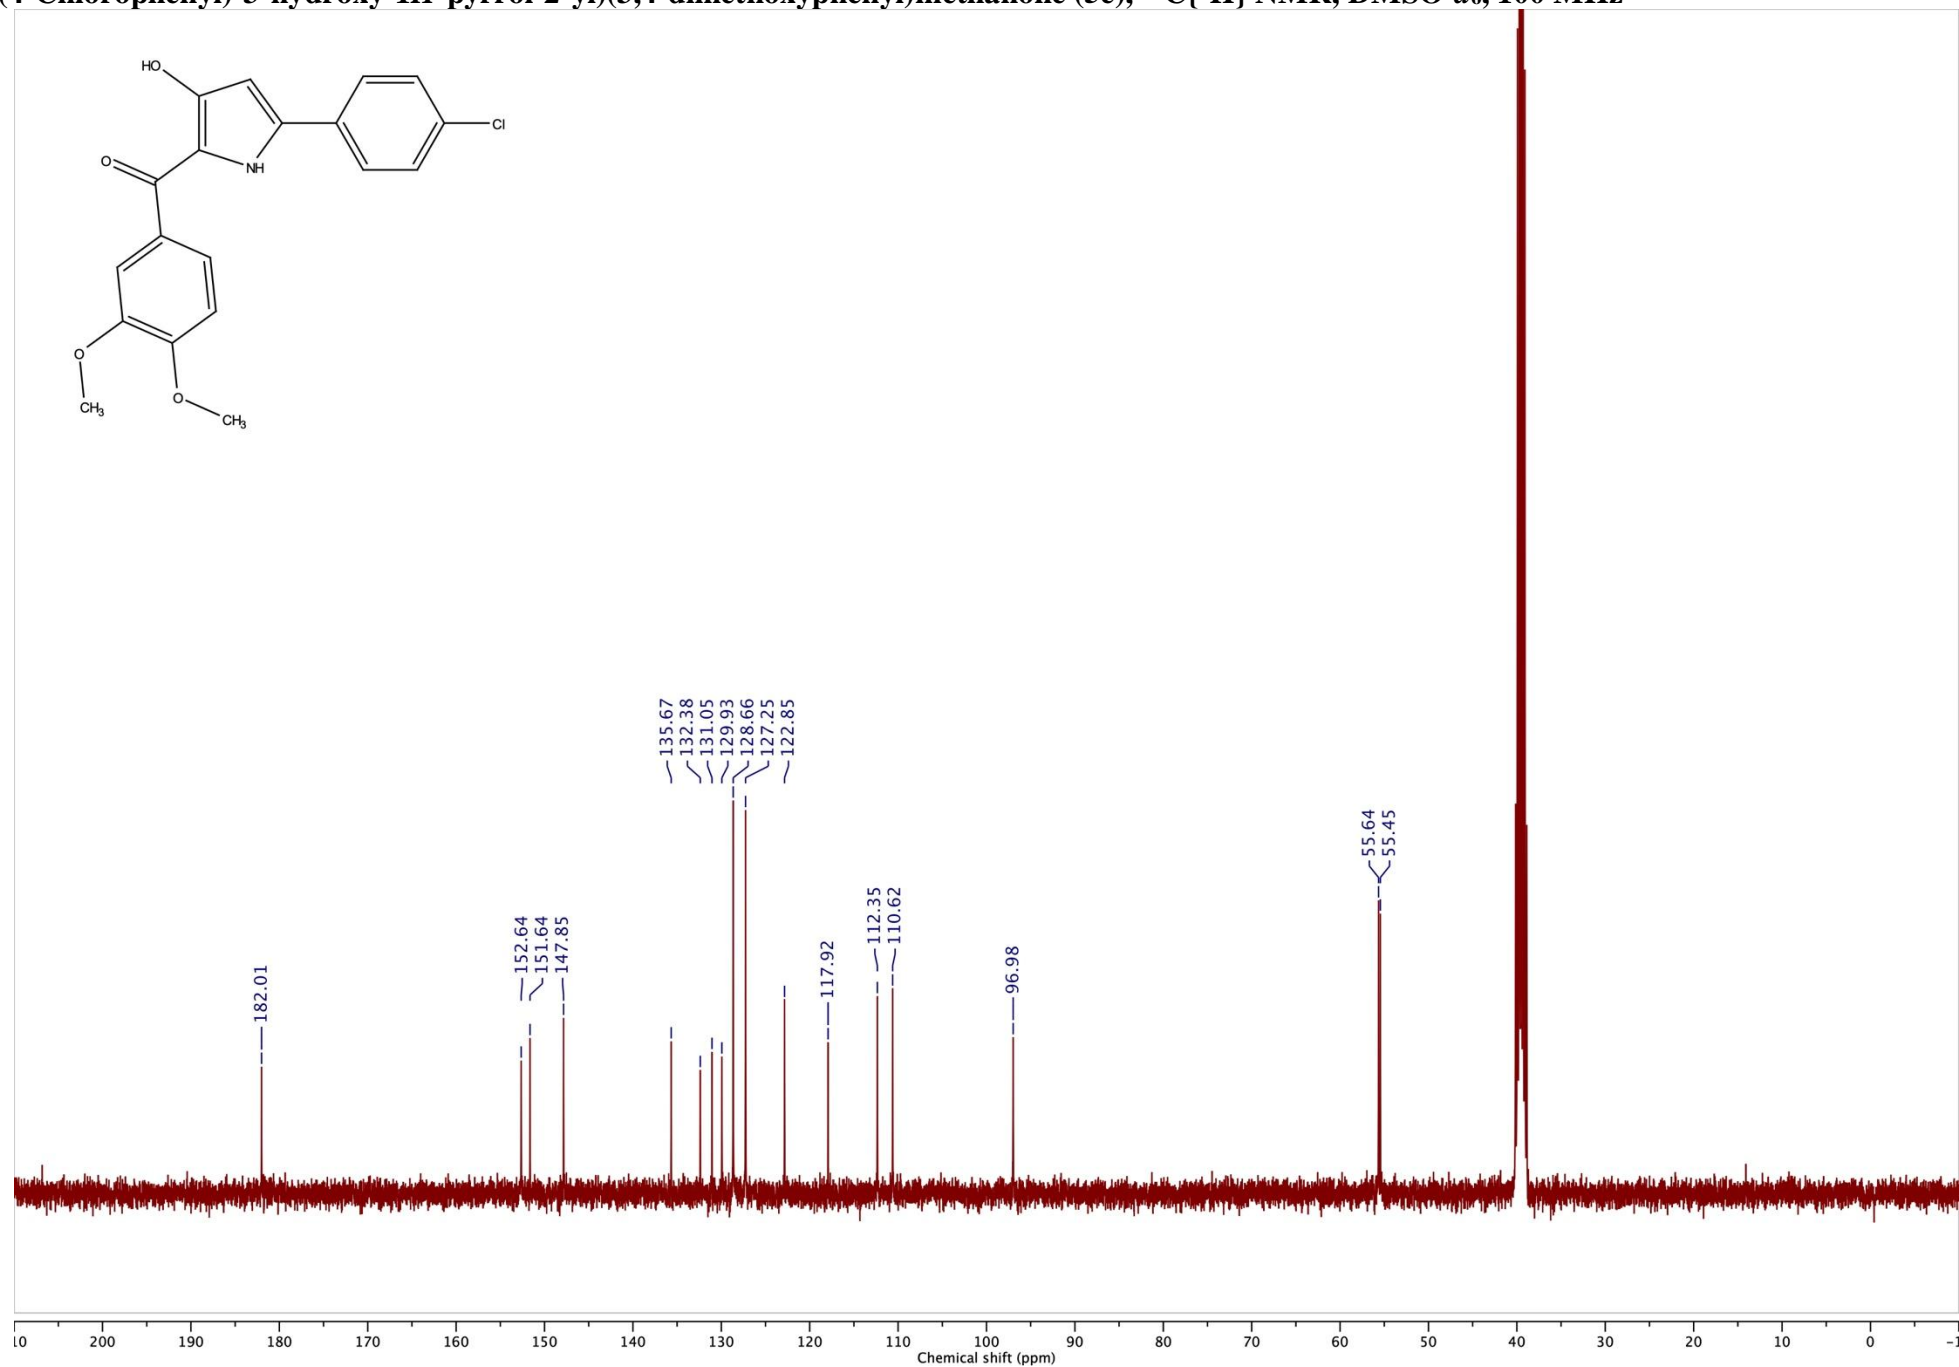

**(5-(4-Chlorophenyl)-3-hydroxy-1H-pyrrol-2-yl)(3,4-dimethoxyphenyl)methanone (5e), DEPT, DMSO-*d*<sub>6</sub>, 100 MHz**

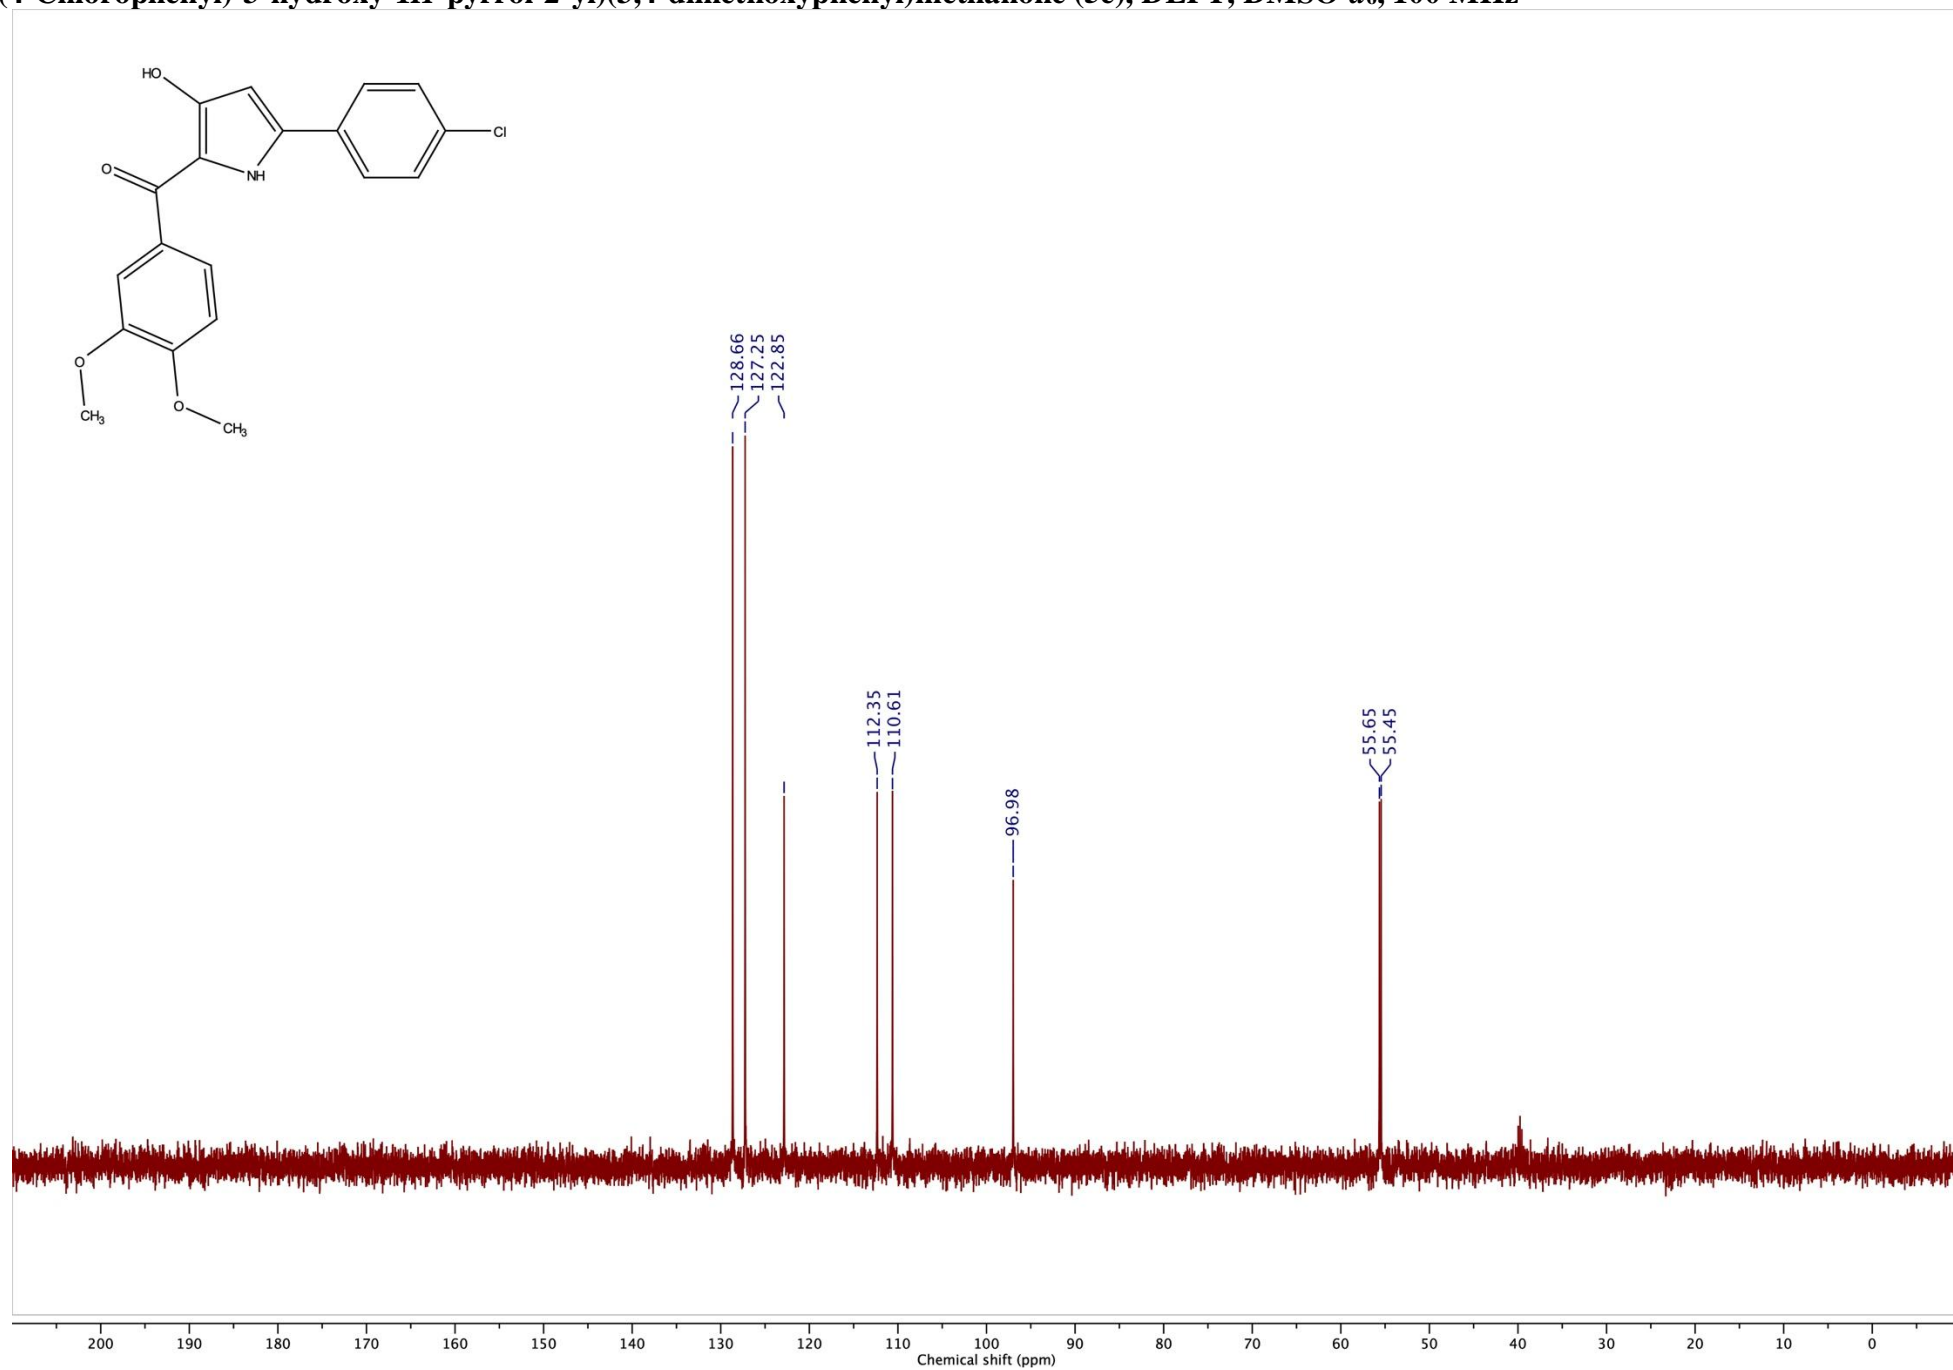

(3-Hydroxy-5-(*p*-tolyl)-1*H*-pyrrol-2-yl)(phenyl)methanone (5f),  $^1\text{H}$  NMR,  $\text{CDCl}_3$ , 400 MHz

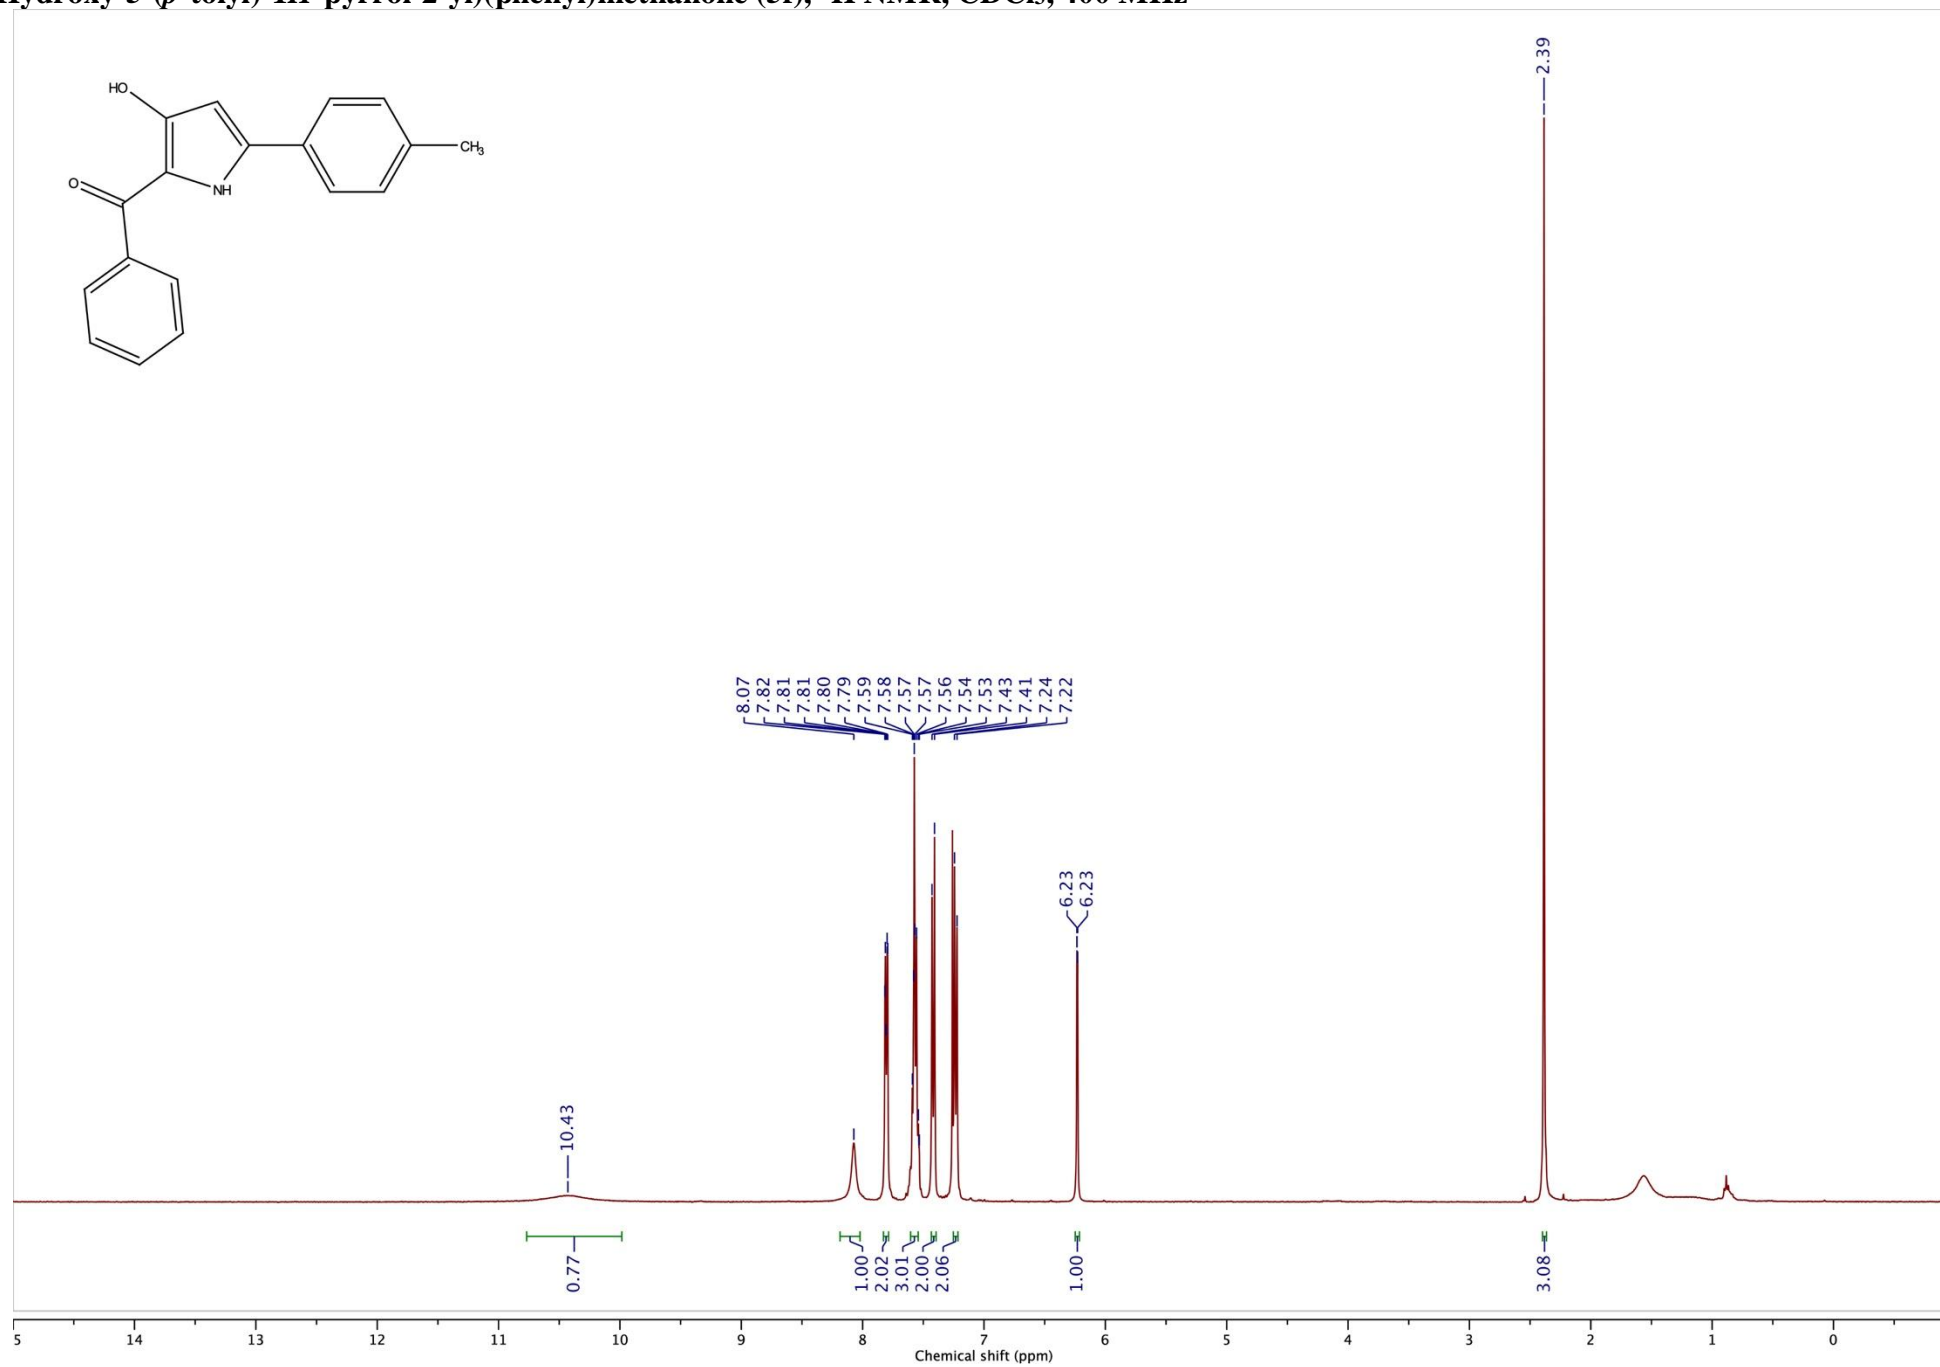

(3-Hydroxy-5-(*p*-tolyl)-1*H*-pyrrol-2-yl)(phenyl)methanone (5f),  $^{13}\text{C}\{^1\text{H}\}$  NMR,  $\text{CDCl}_3$ , 100 MHz

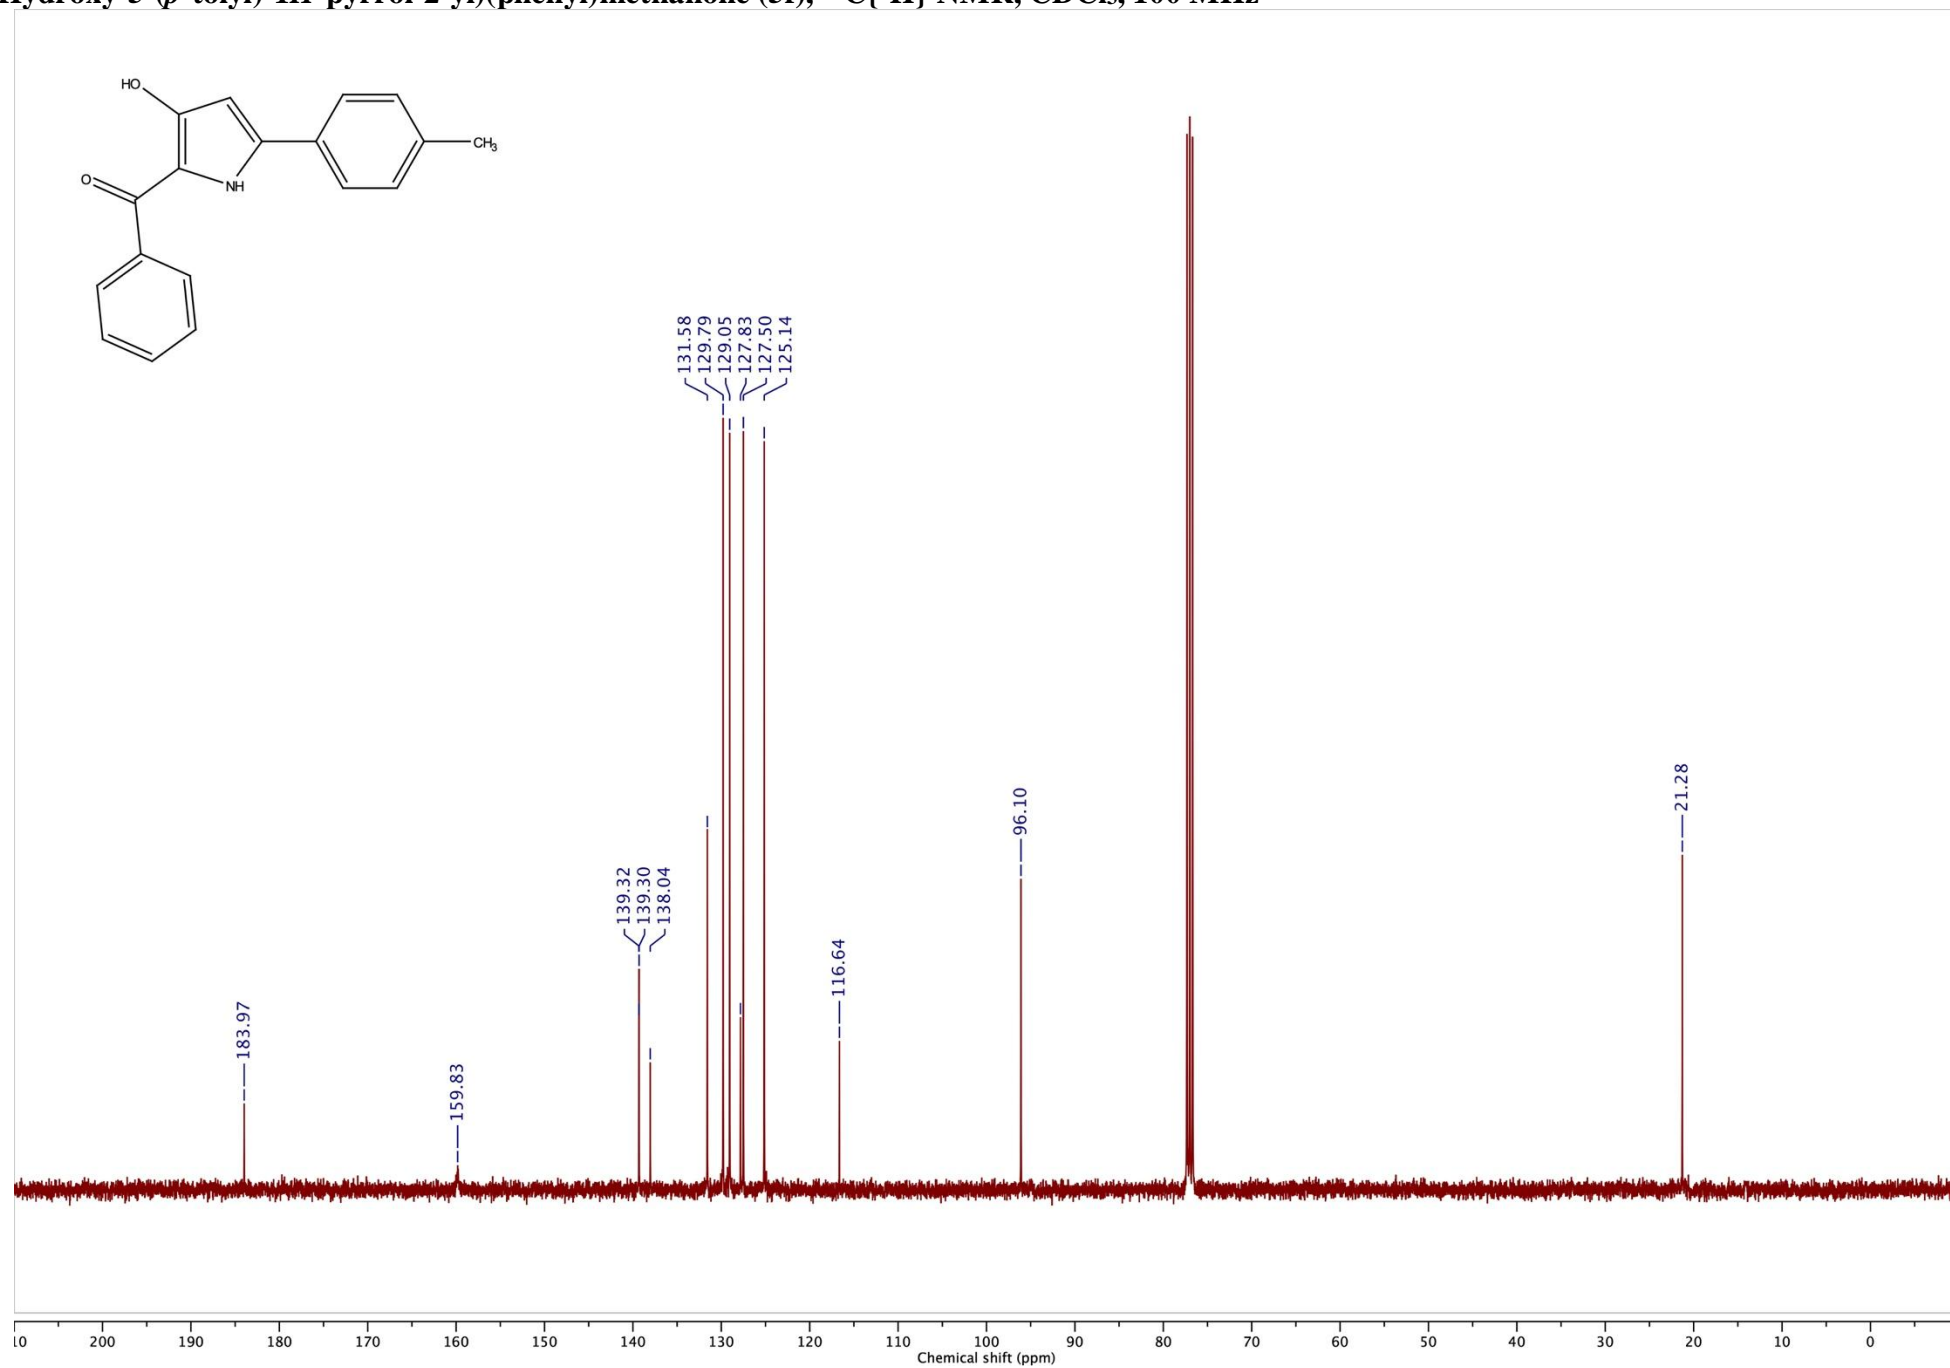

**(3-Hydroxy-5-(*p*-tolyl)-1*H*-pyrrol-2-yl)(phenyl)methanone (5f), DEPT, CDCl<sub>3</sub>, 100 MHz**

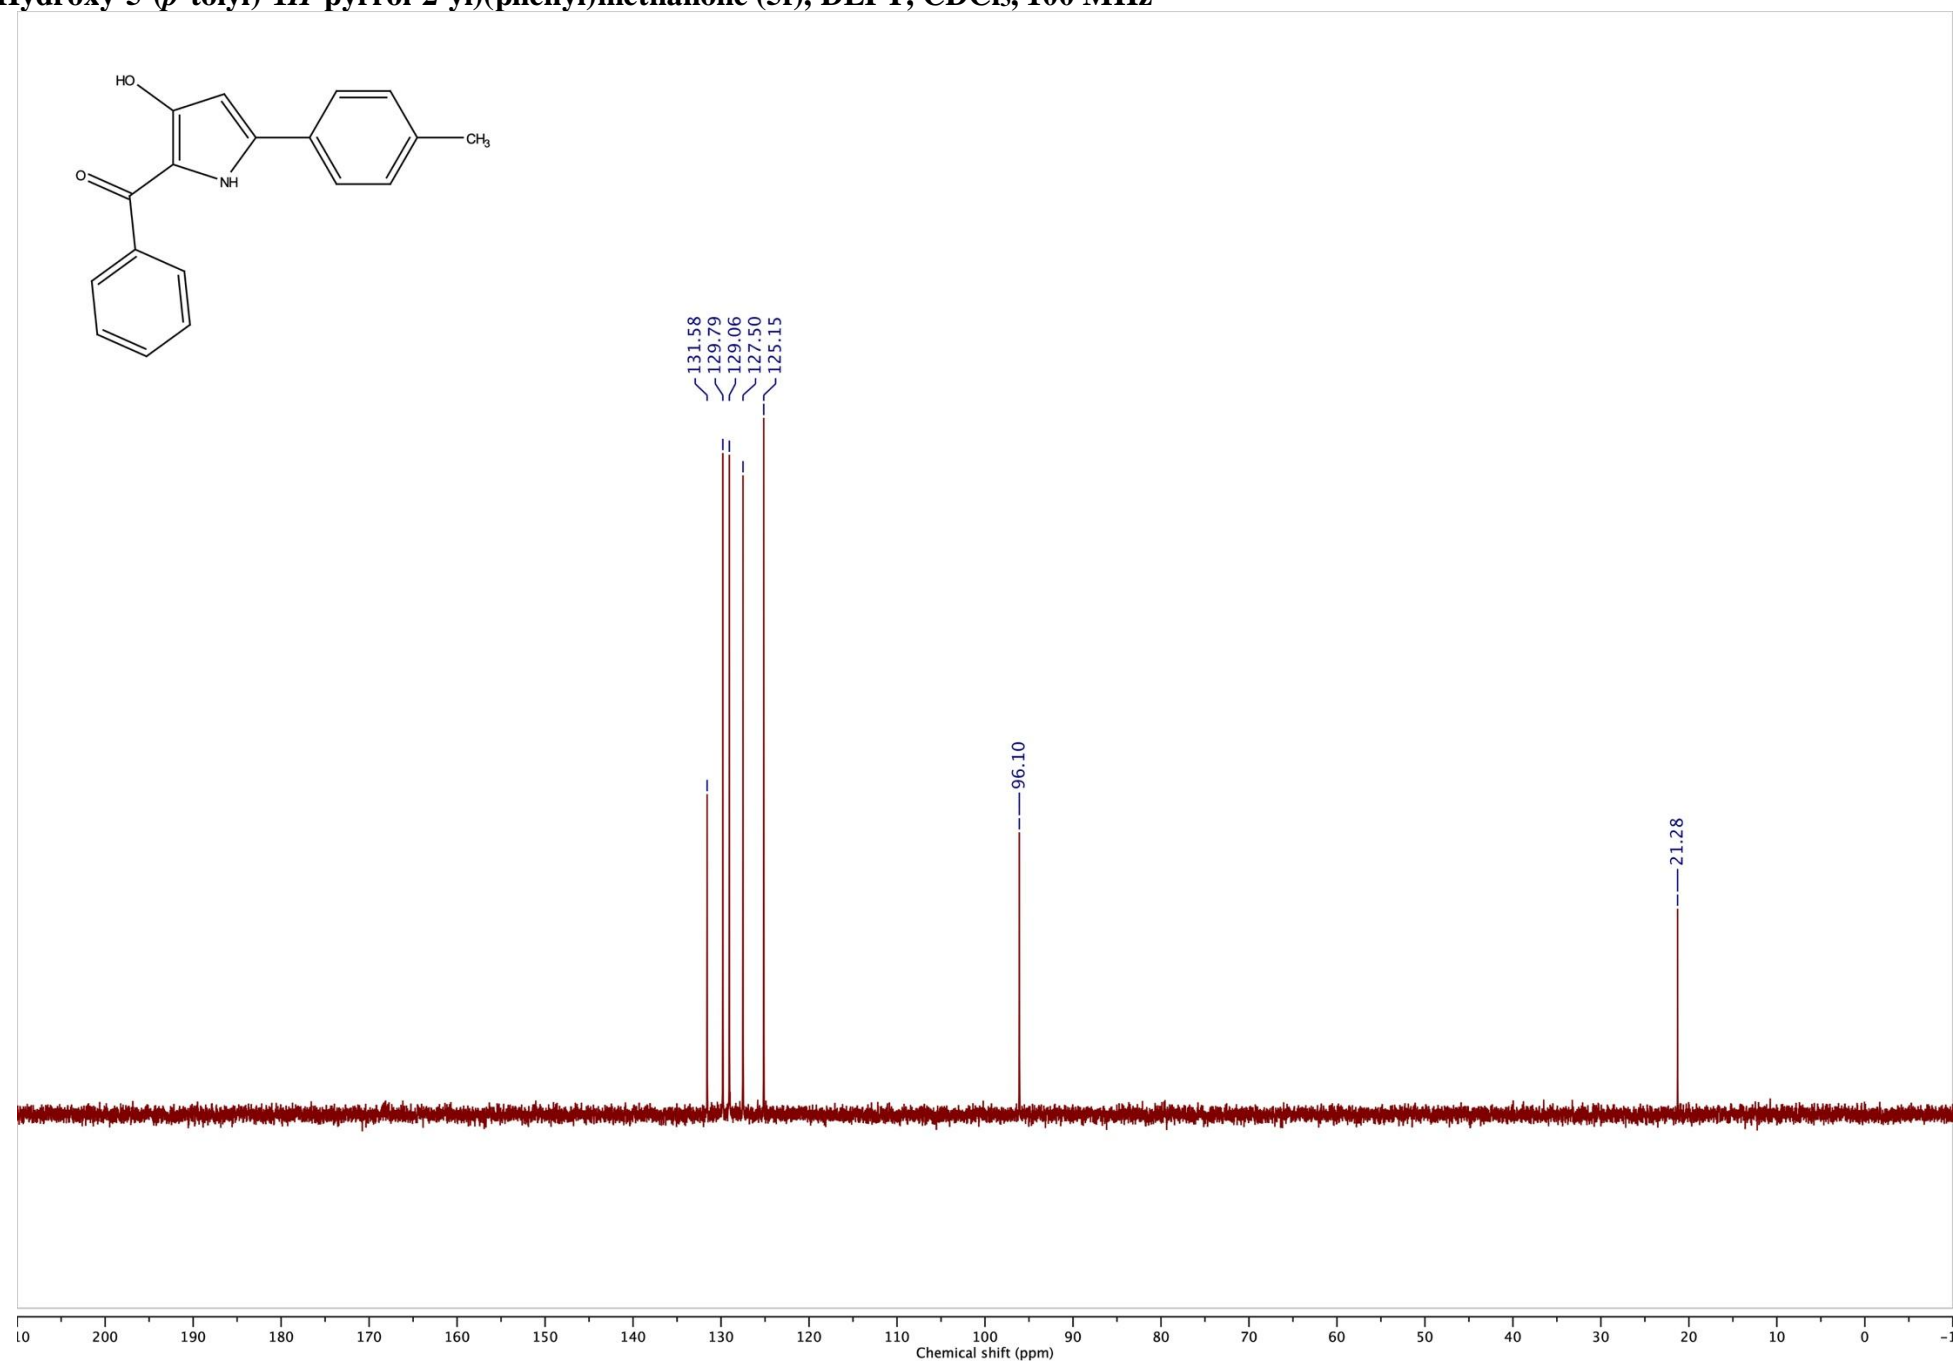

**(3-Hydroxy-5-(4-methoxyphenyl)-1H-pyrrol-2-yl)(*p*-tolyl)methanone (5g), <sup>1</sup>H NMR, CDCl<sub>3</sub>, 400 MHz**

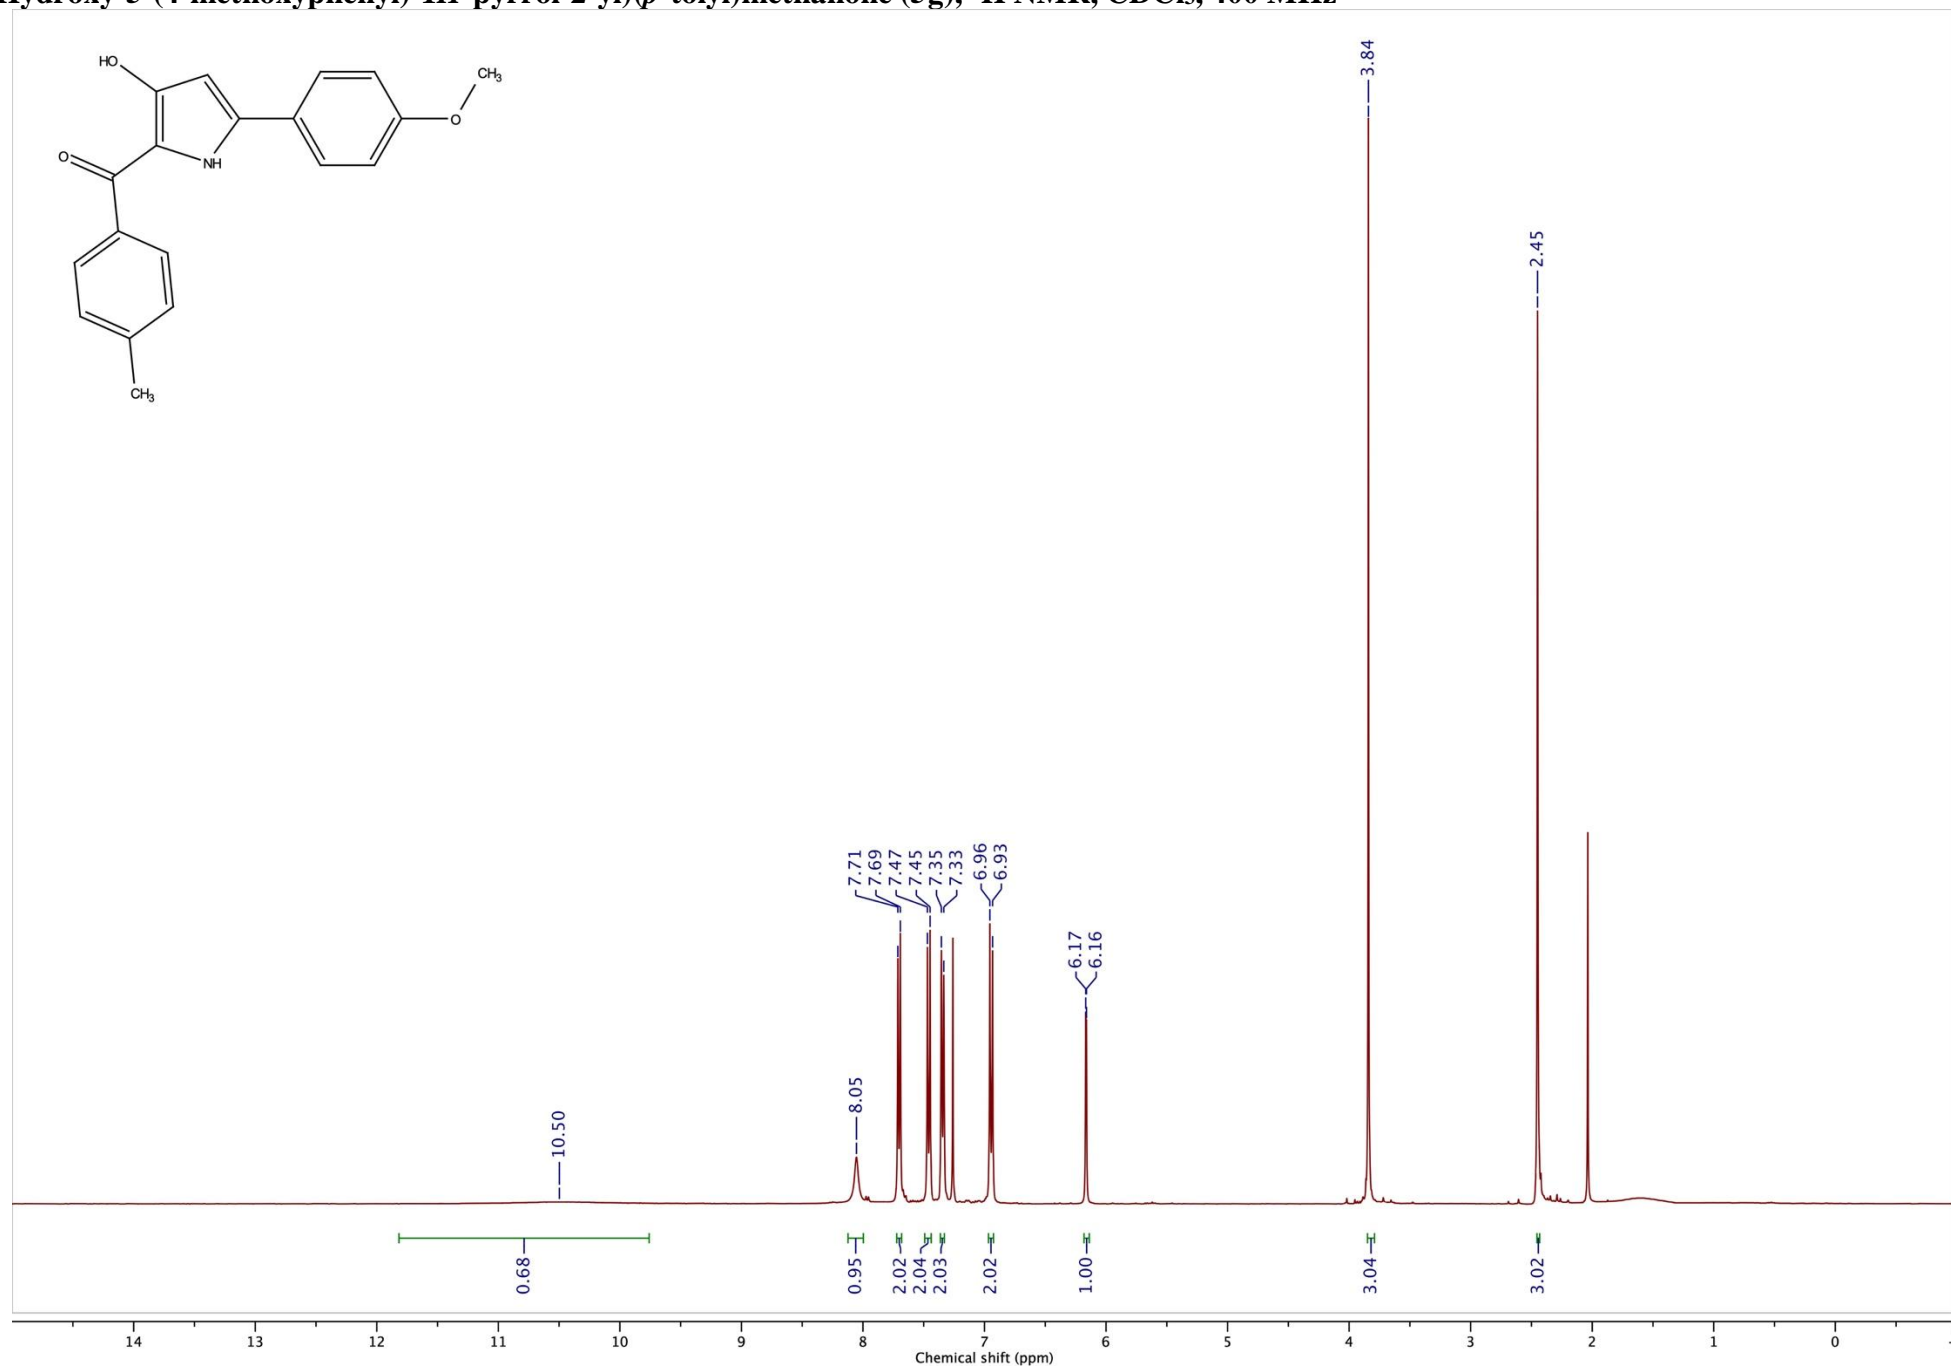

(3-Hydroxy-5-(4-methoxyphenyl)-1H-pyrrol-2-yl)(*p*-tolyl)methanone (5g),  $^{13}\text{C}\{^1\text{H}\}$  NMR,  $\text{CDCl}_3$ , 100 MHz

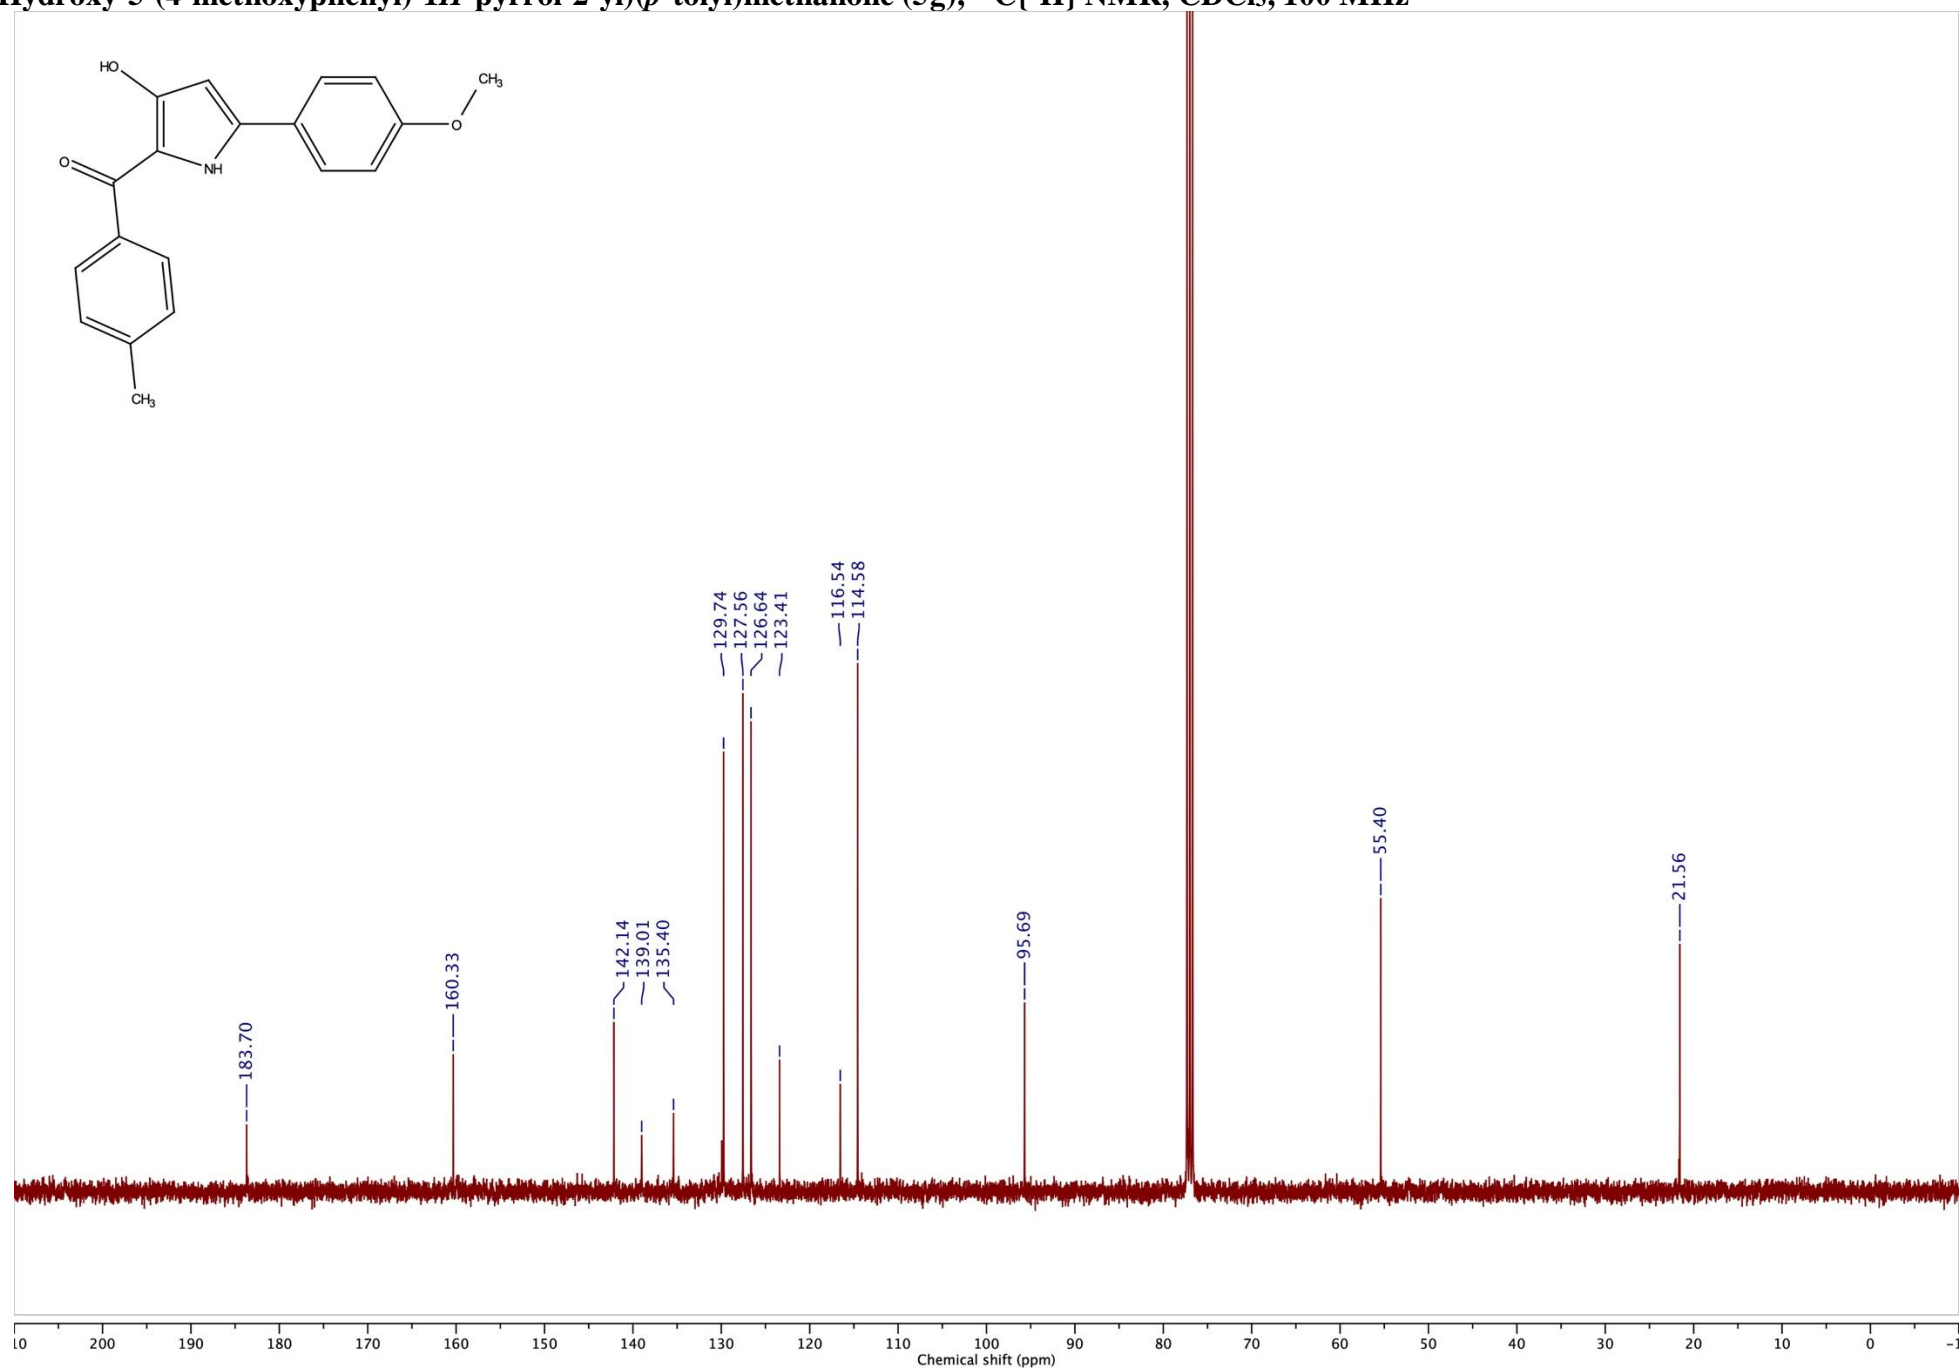

**(3-Hydroxy-5-(4-methoxyphenyl)-1H-pyrrol-2-yl)(*p*-tolyl)methanone (5g), DEPT, CDCl<sub>3</sub>, 100 MHz**

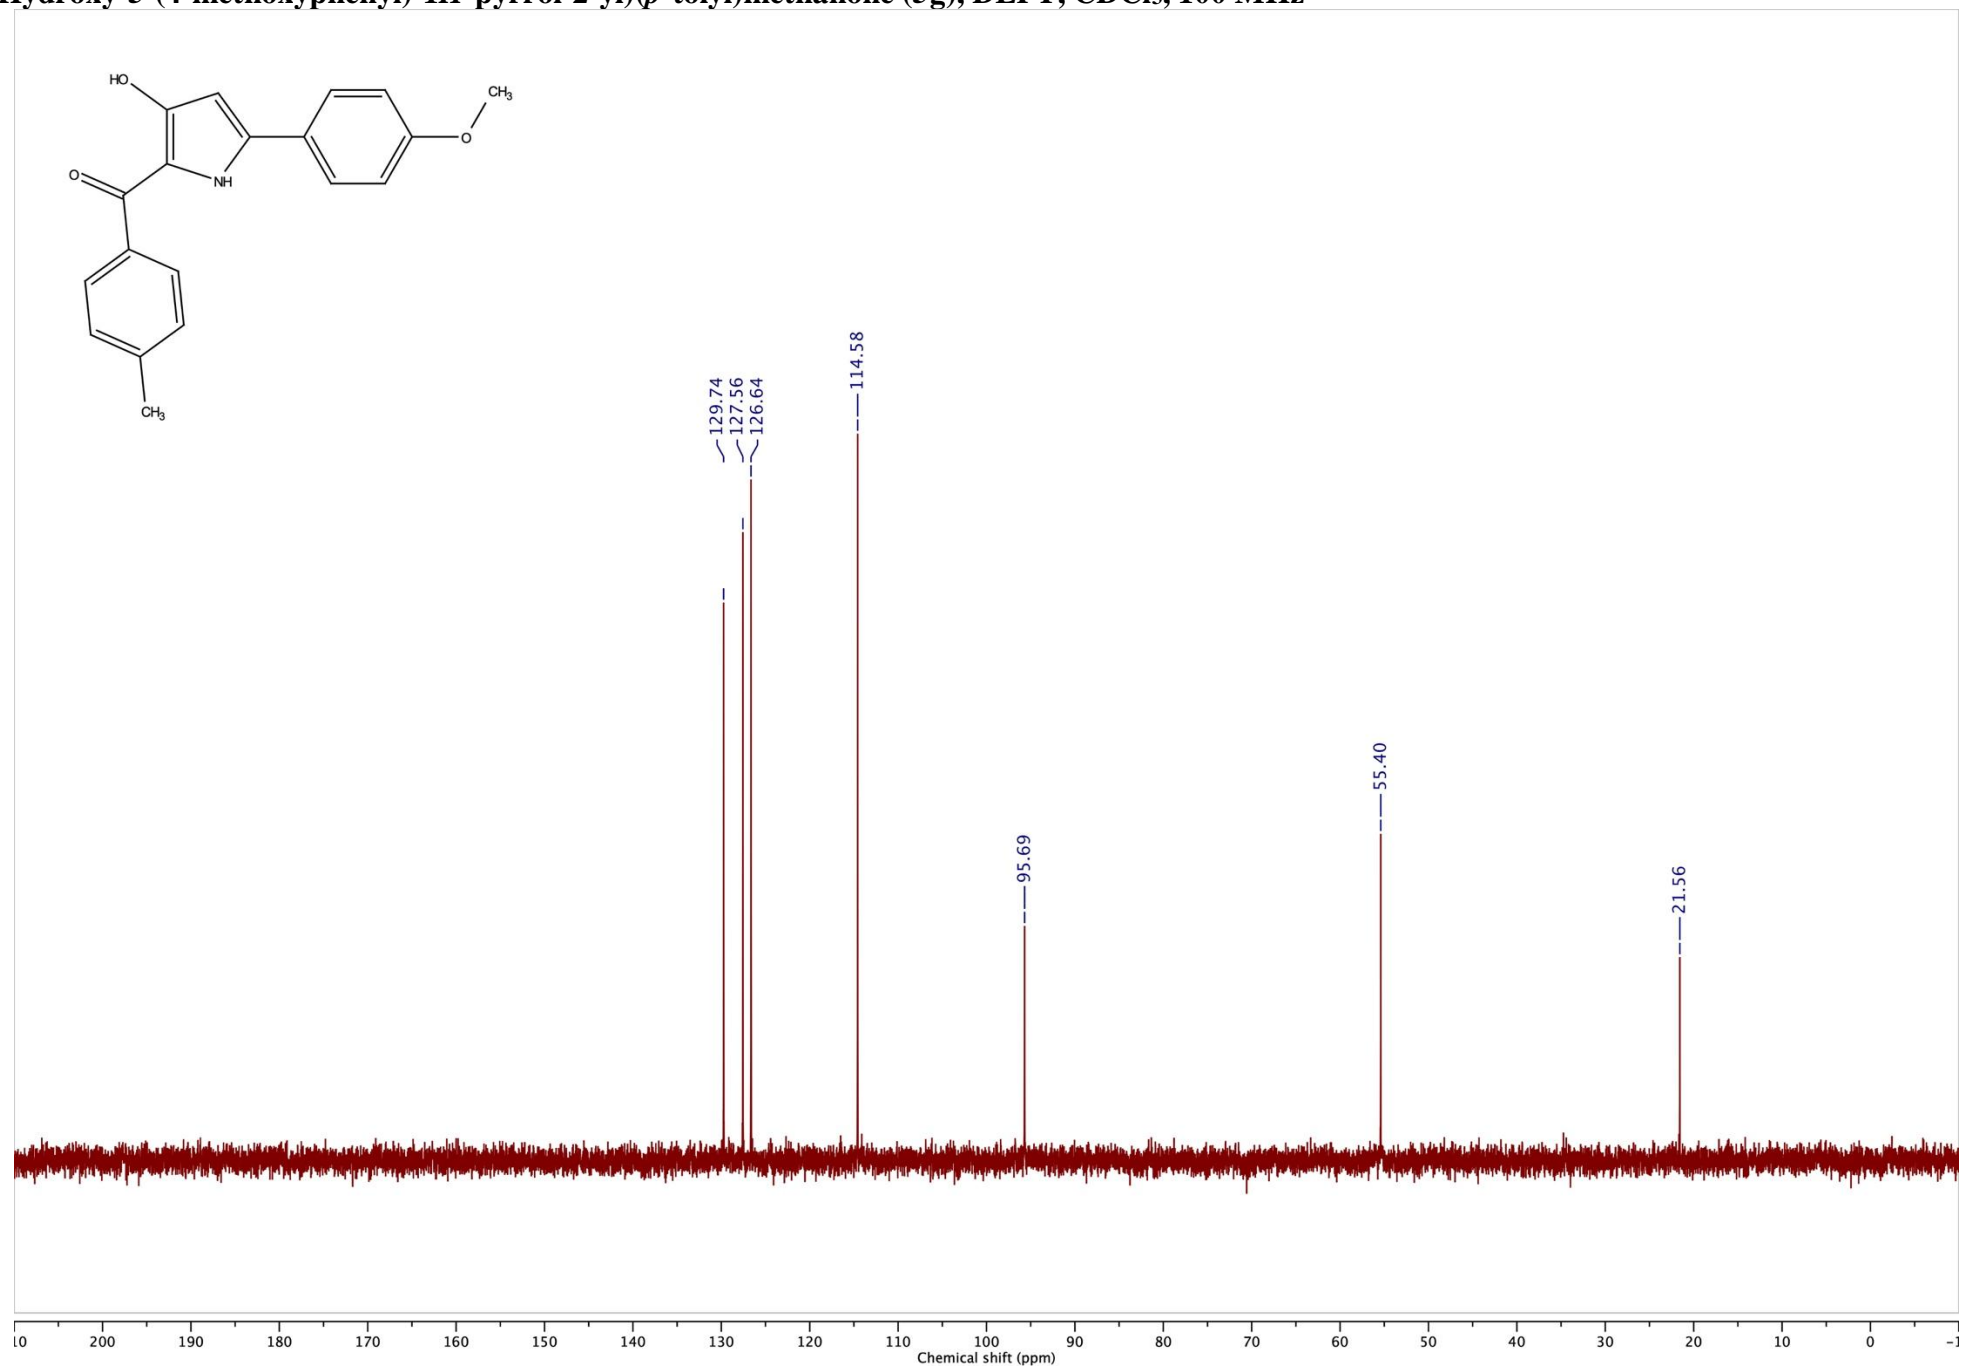

***N*-[4-(4-Hydroxy-5-(4-methylbenzoyl)-1*H*-pyrrol-2-yl)phenyl]acetamide (5h), <sup>1</sup>H NMR, DMSO-*d*<sub>6</sub>, 400 MHz**

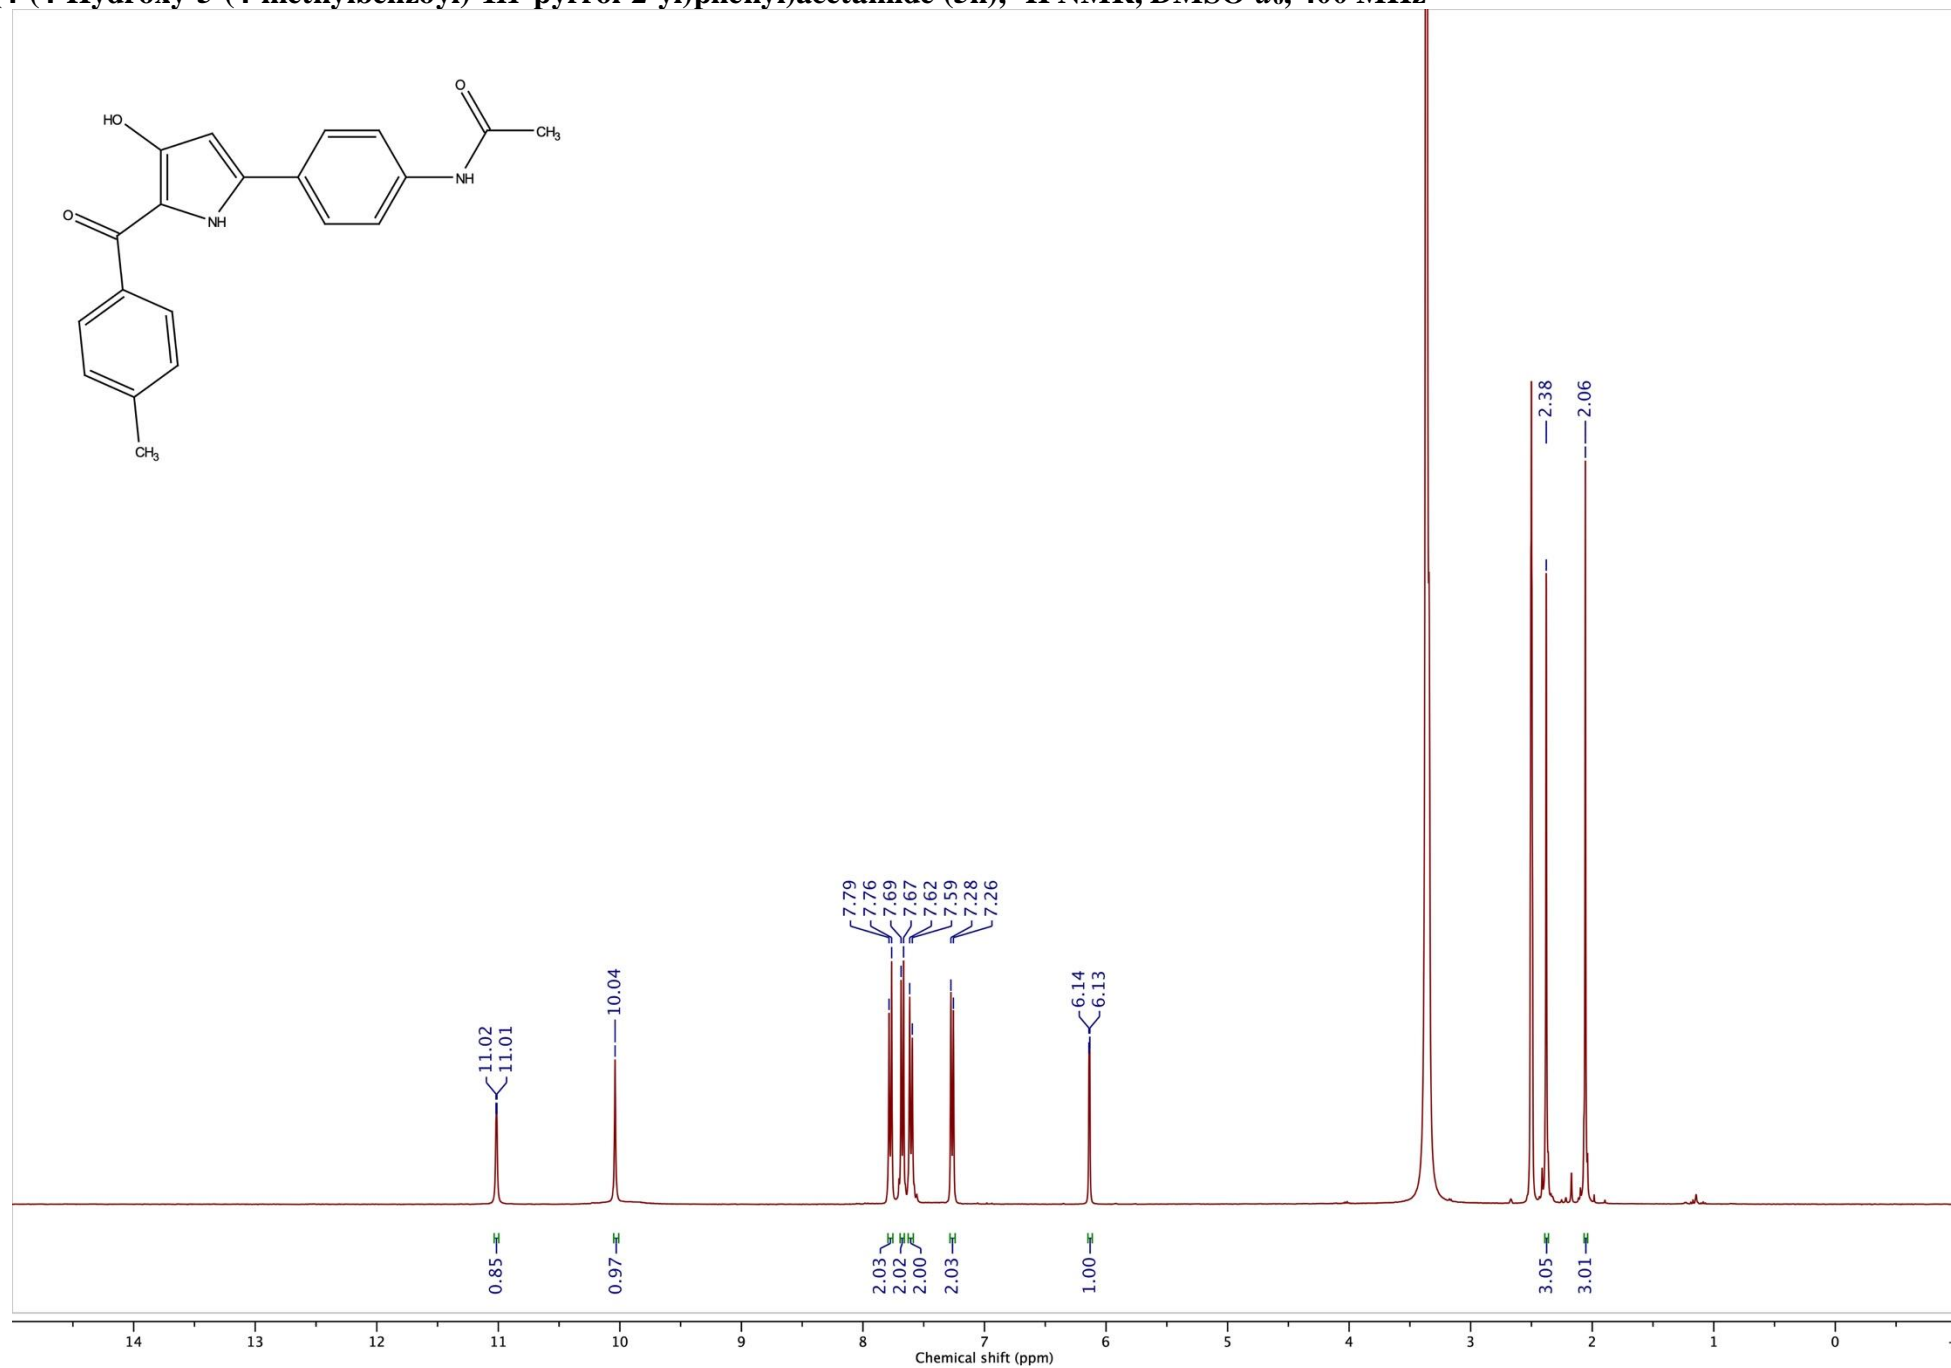

***N*-[4-(4-Hydroxy-5-(4-methylbenzoyl)-1*H*-pyrrol-2-yl)phenyl]acetamide (5h),  $^{13}\text{C}\{^1\text{H}\}$  NMR,  $\text{DMSO-}d_6$ , 100 MHz**

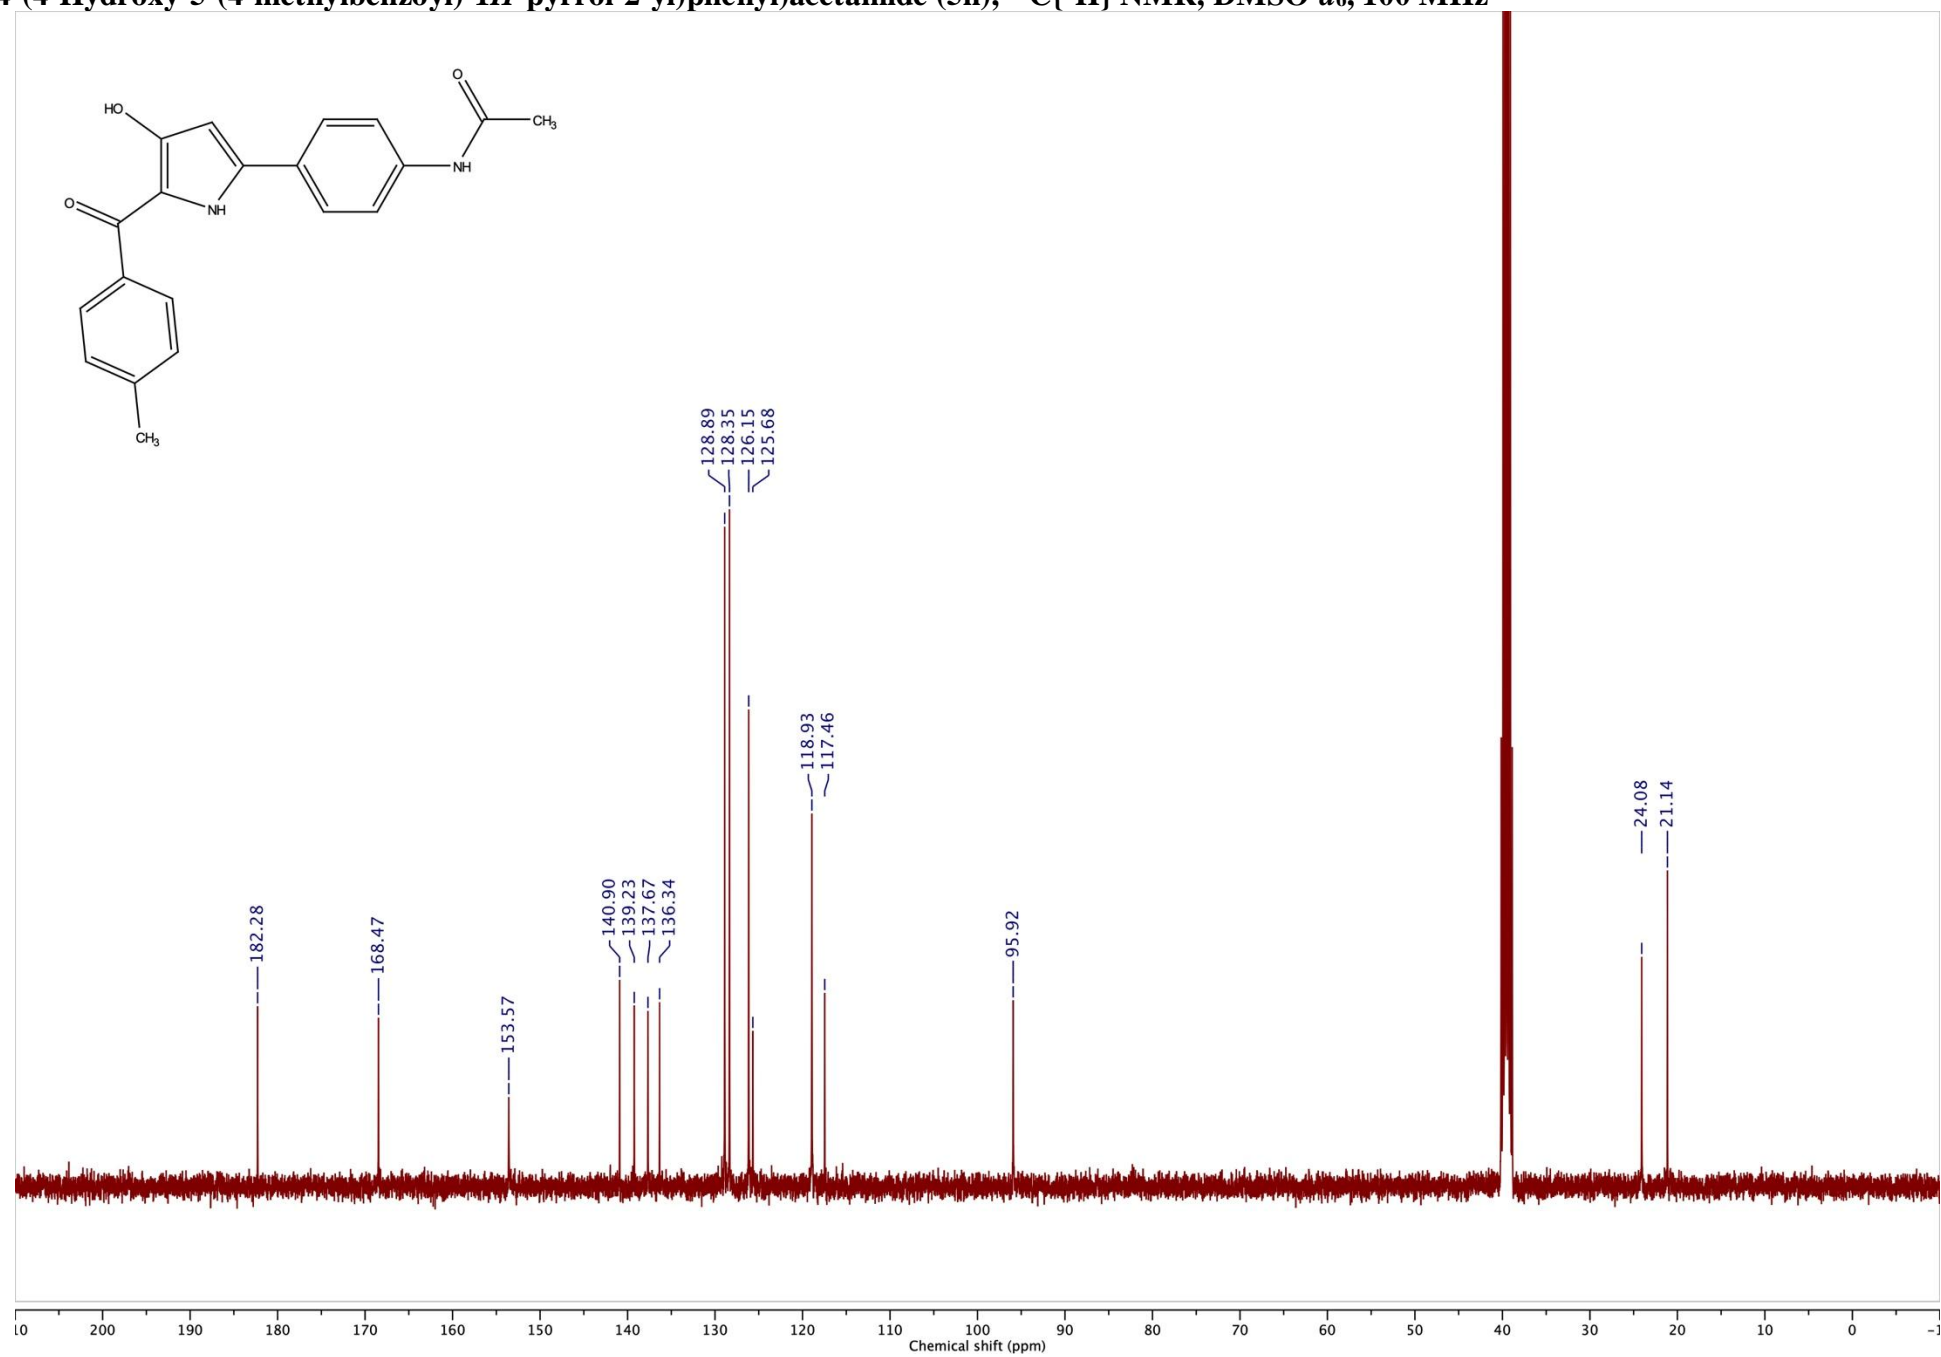

***N*-[4-(4-Hydroxy-5-(4-methylbenzoyl)-1*H*-pyrrol-2-yl)phenyl]acetamide (5h), DEPT, DMSO-*d*<sub>6</sub>, 100 MHz**

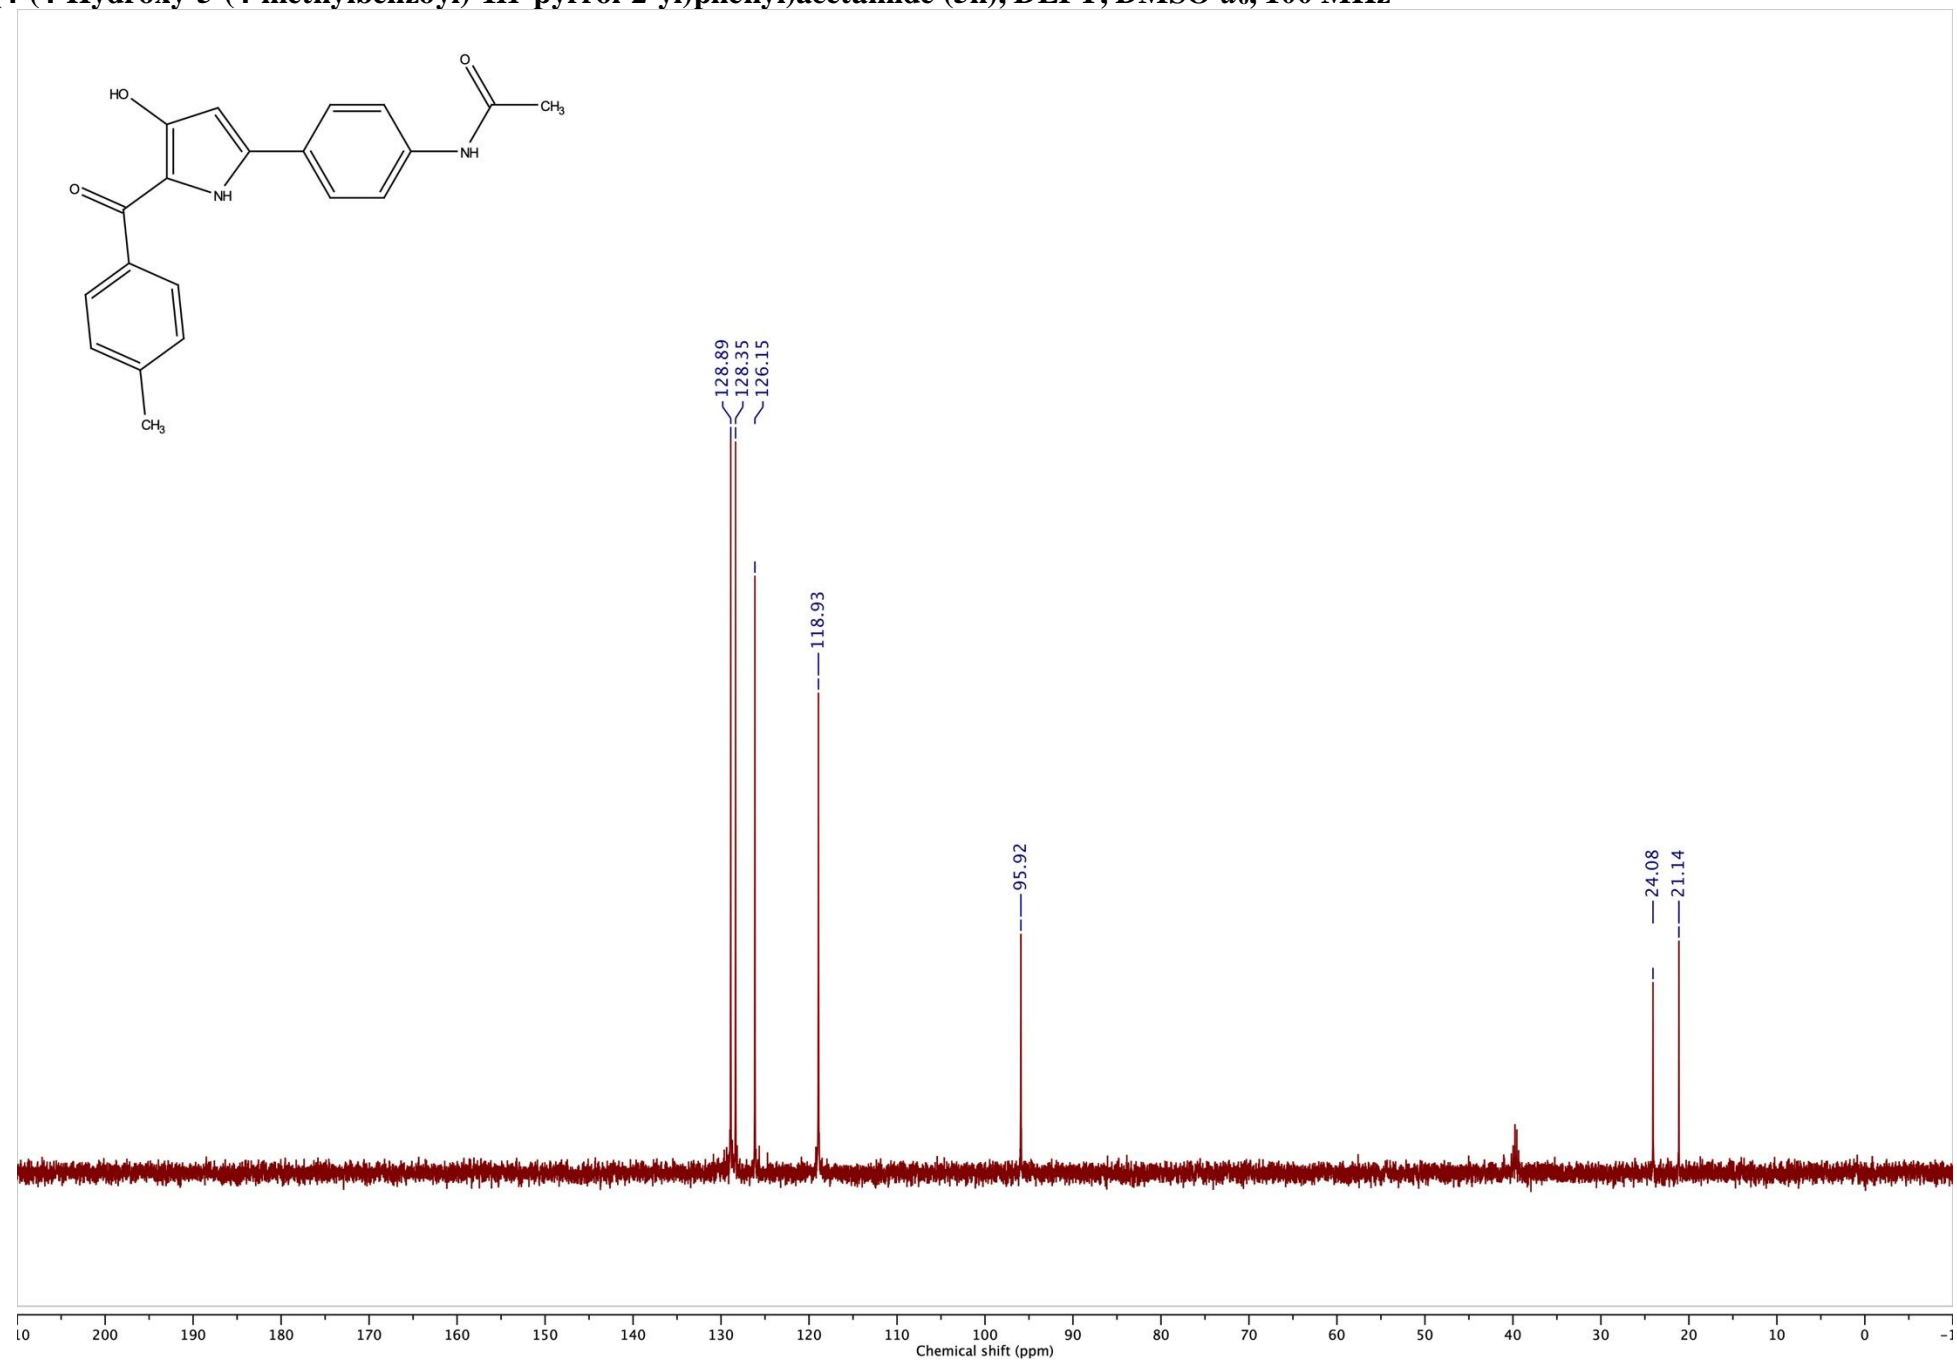

(5-(2,3-Dihydrobenzo[*b*][1,4]dioxin-6-yl)-3-hydroxy-1*H*-pyrrol-2-yl)(*p*-tolyl)methanone (5i), <sup>1</sup>H NMR, CDCl<sub>3</sub>, 400 MHz

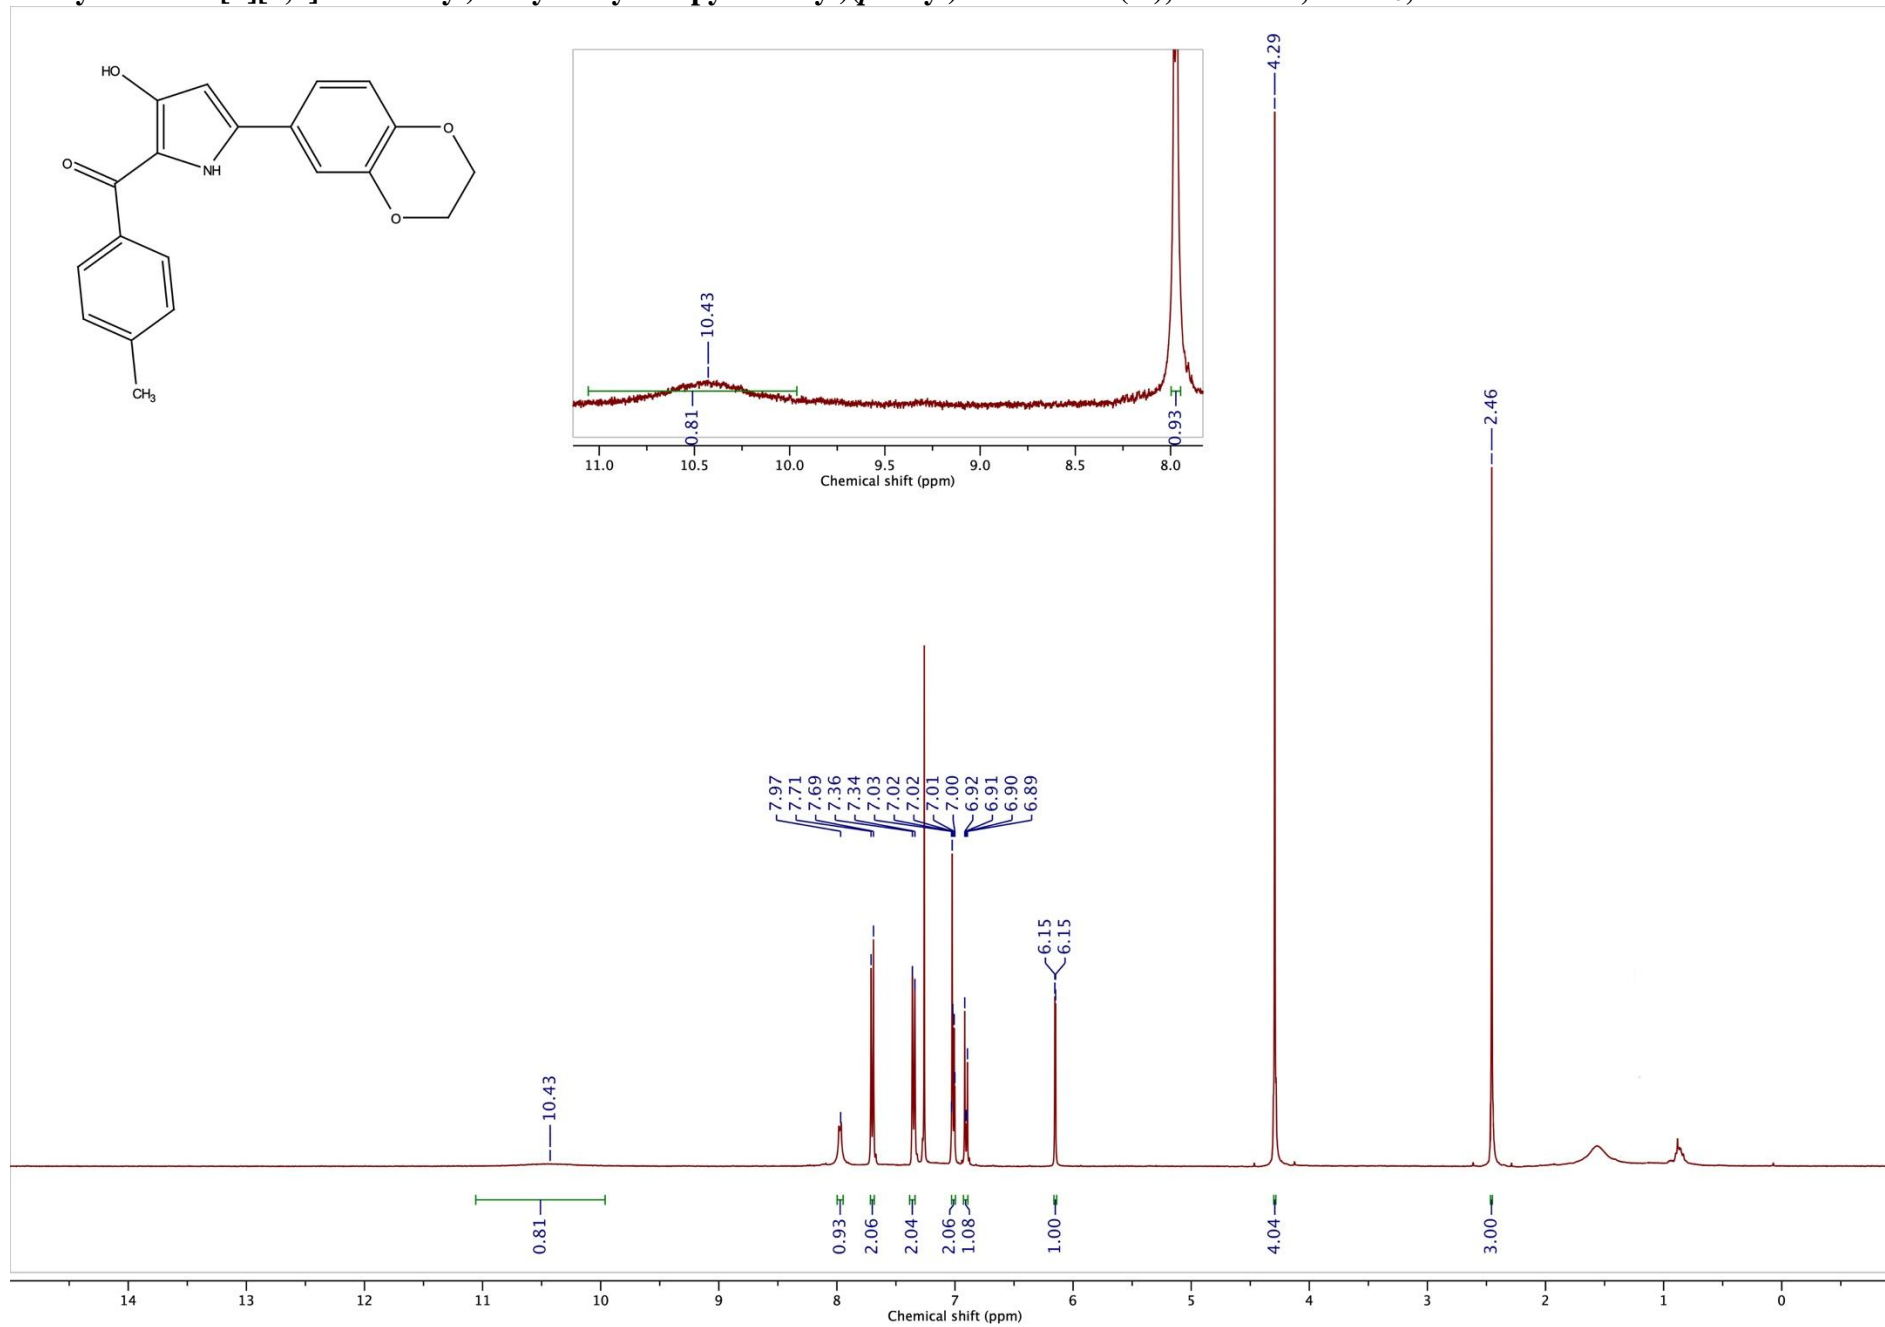

(5-(2,3-Dihydrobenzo[*b*][1,4]dioxin-6-yl)-3-hydroxy-1*H*-pyrrol-2-yl)(*p*-tolyl)methanone (5i),  $^{13}\text{C}\{^1\text{H}\}$  NMR,  $\text{CDCl}_3$ , 100 MHz

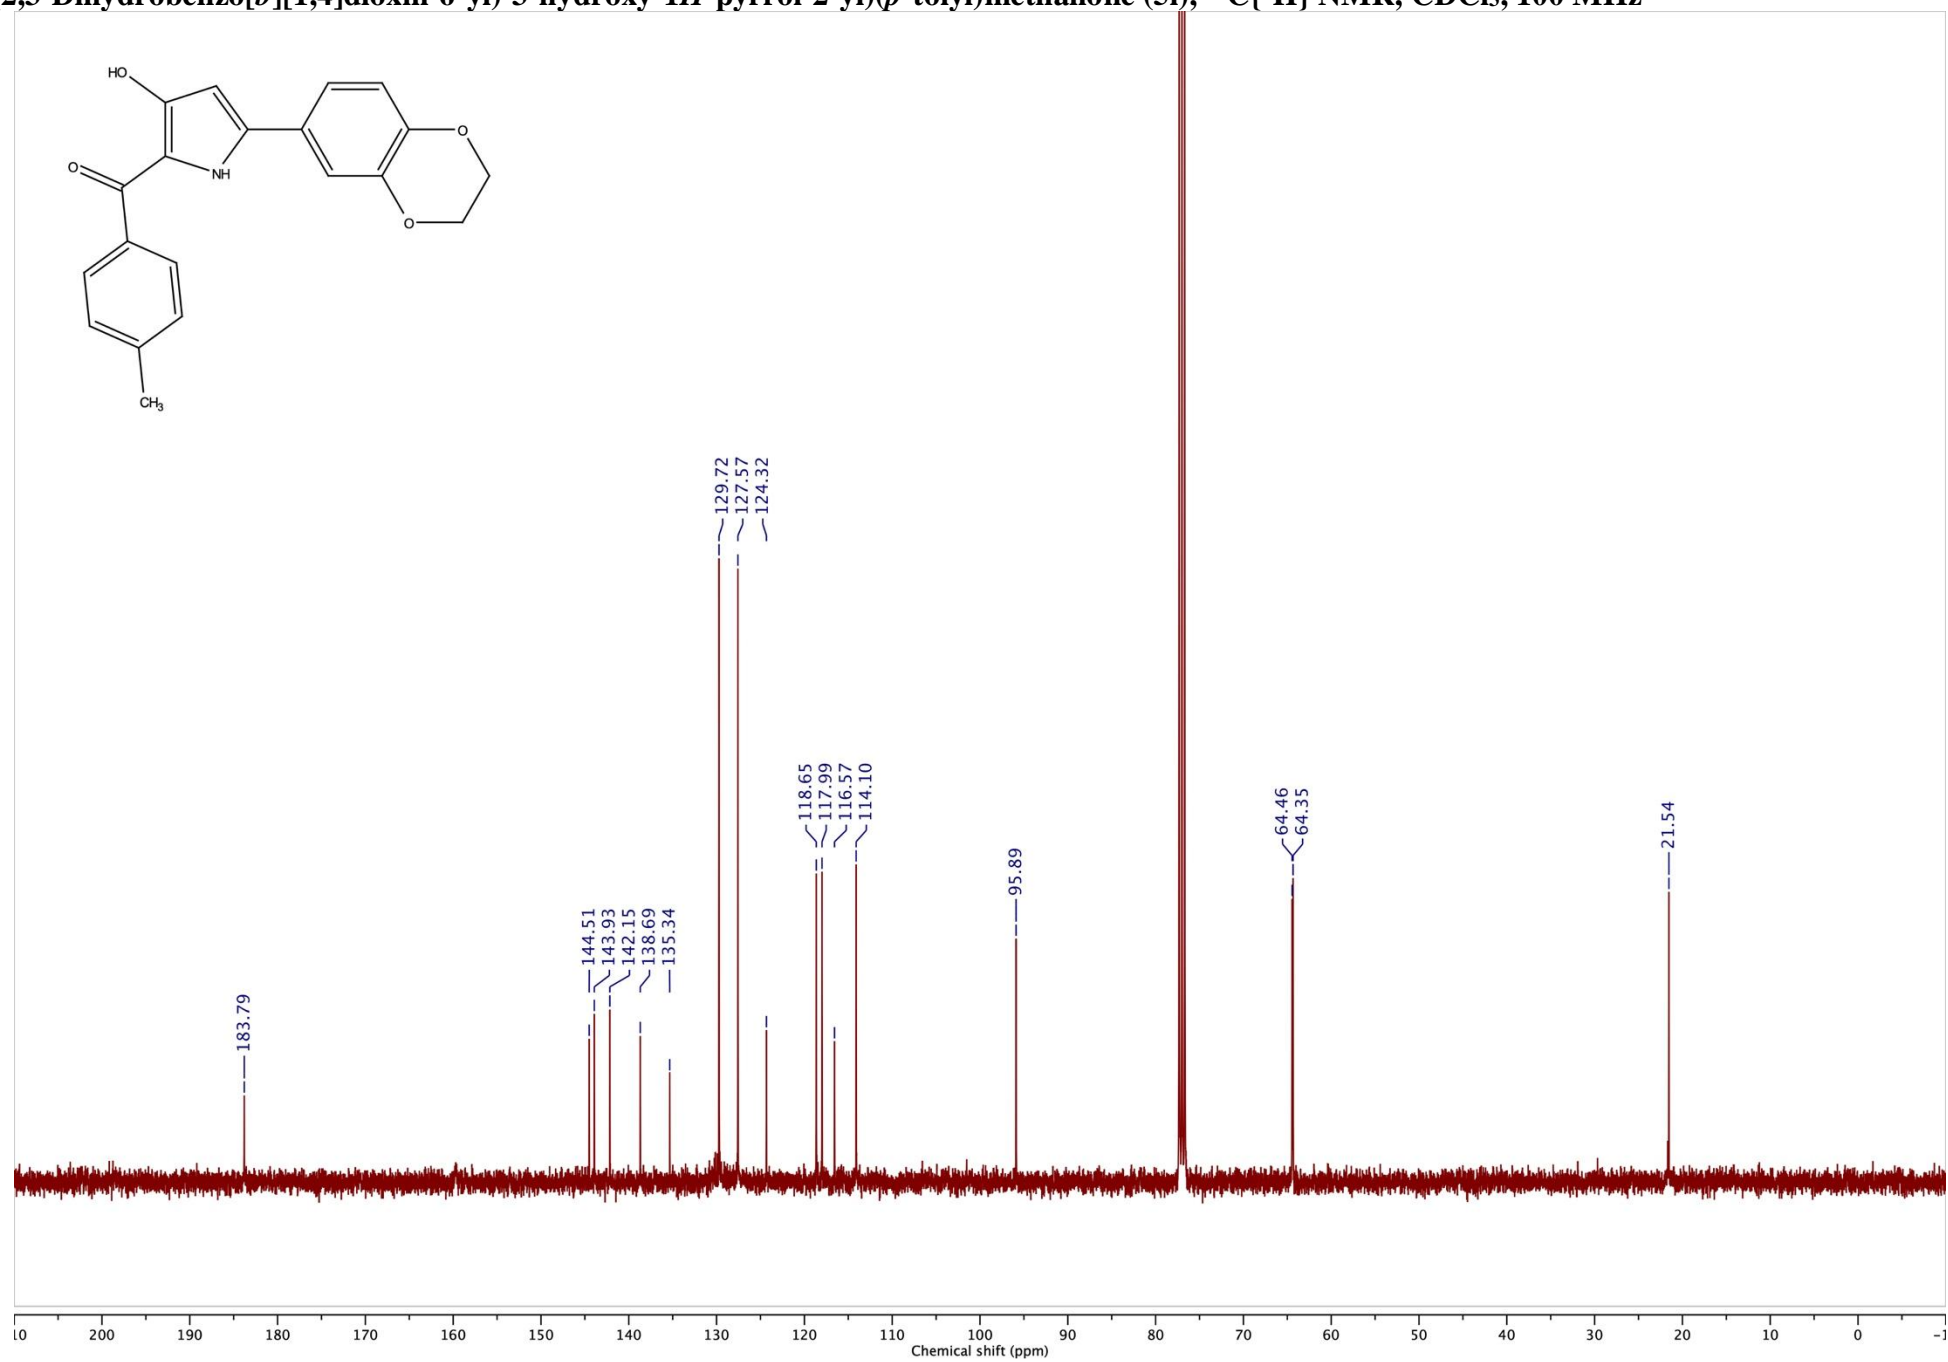

(5-(2,3-Dihydrobenzo[*b*][1,4]dioxin-6-yl)-3-hydroxy-1*H*-pyrrol-2-yl)(*p*-tolyl)methanone (5i), DEPT, CDCl<sub>3</sub>, 100 MHz

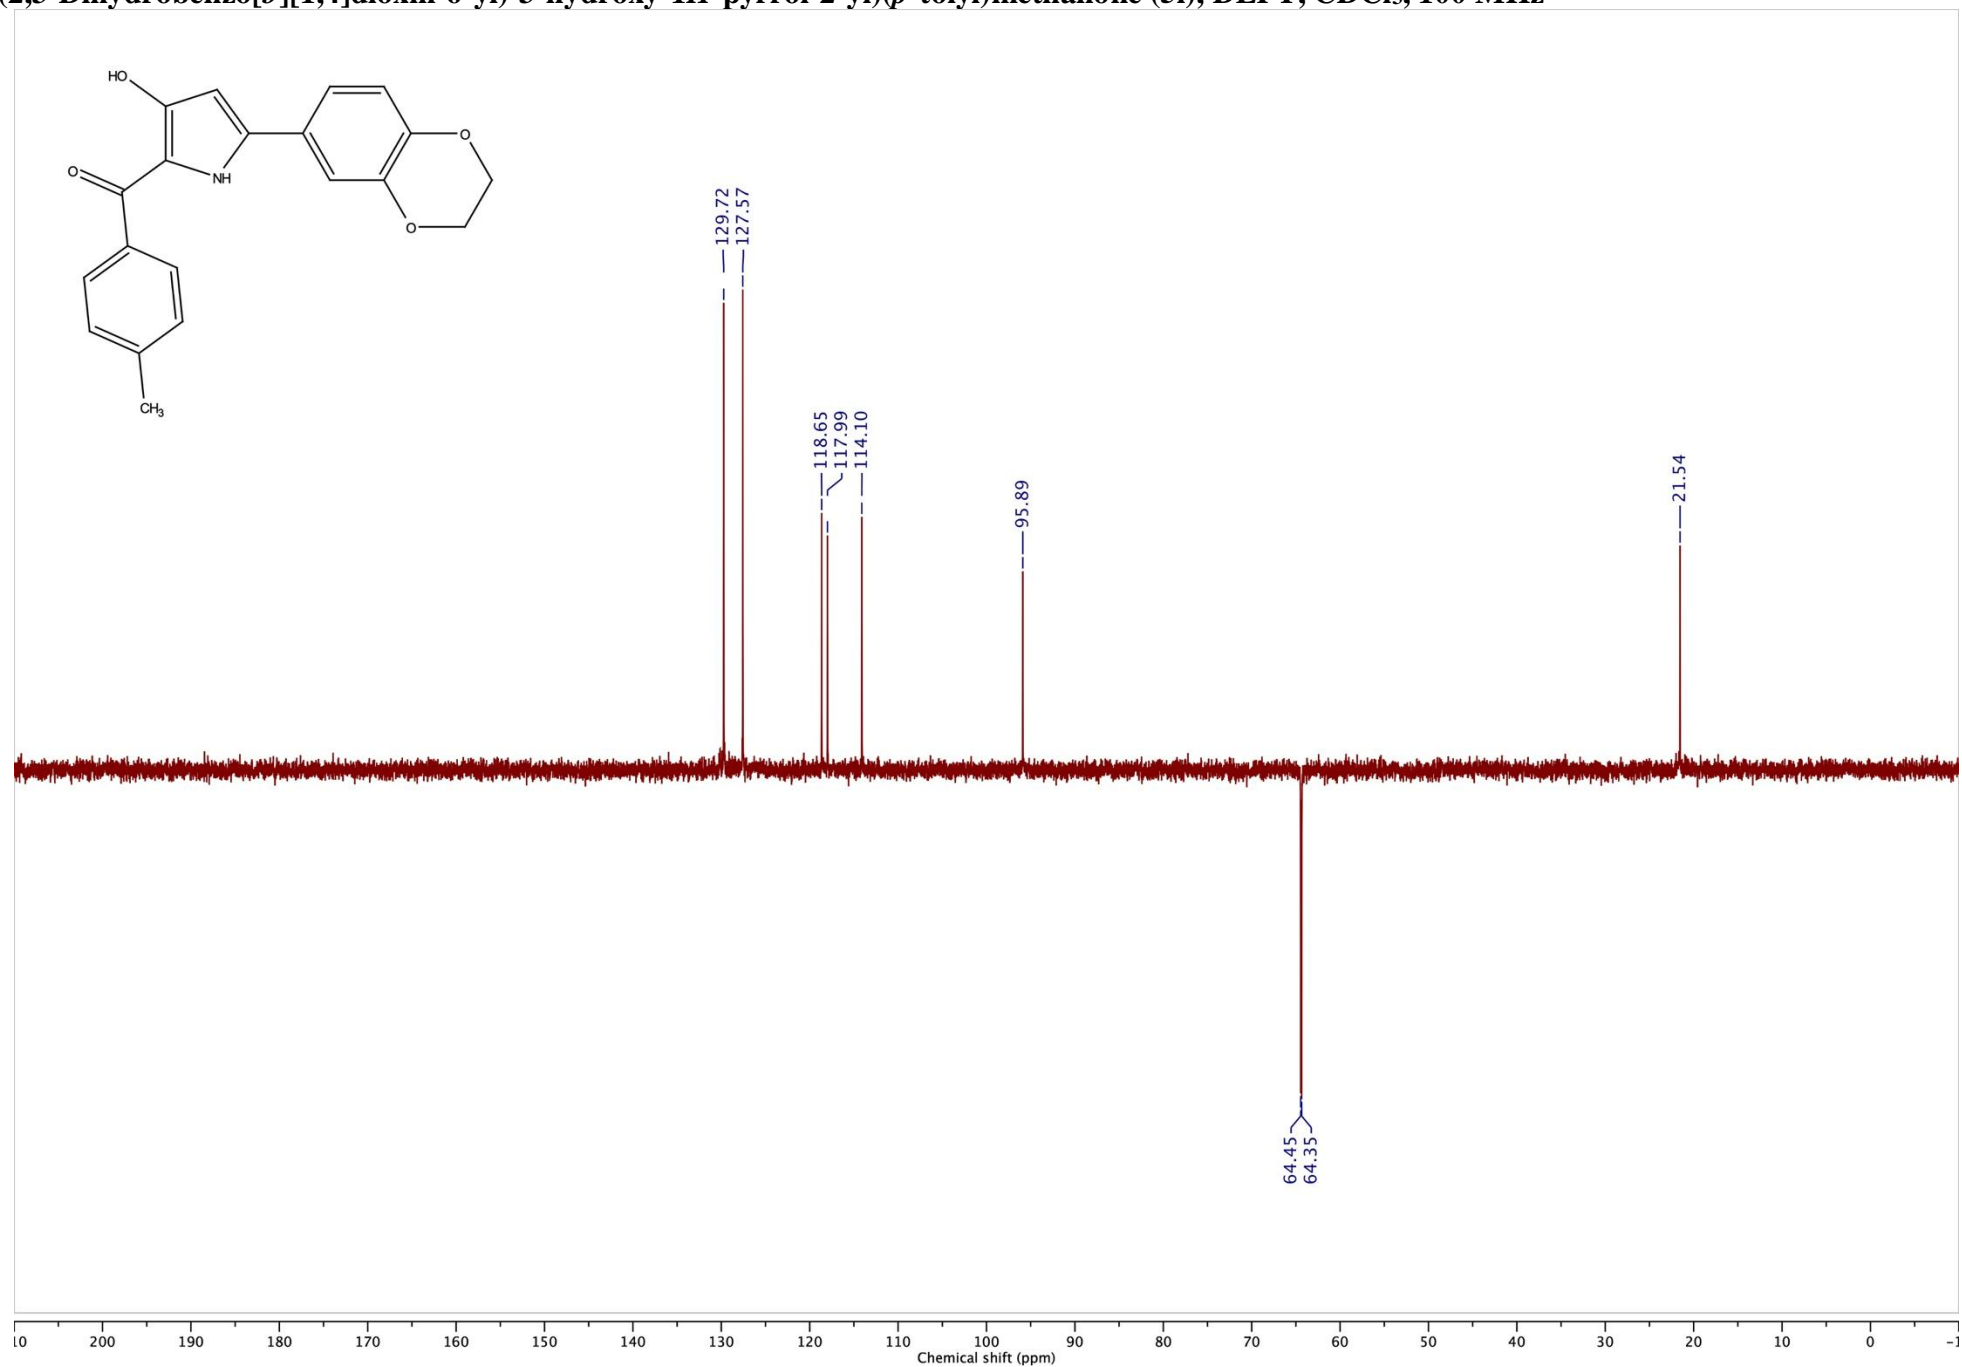

(5-(4-Bromophenyl)-3-hydroxy-1H-pyrrol-2-yl)(4-(tert-butyl)phenyl)methanone (5j), <sup>1</sup>H NMR, CDCl<sub>3</sub>, 400 MHz

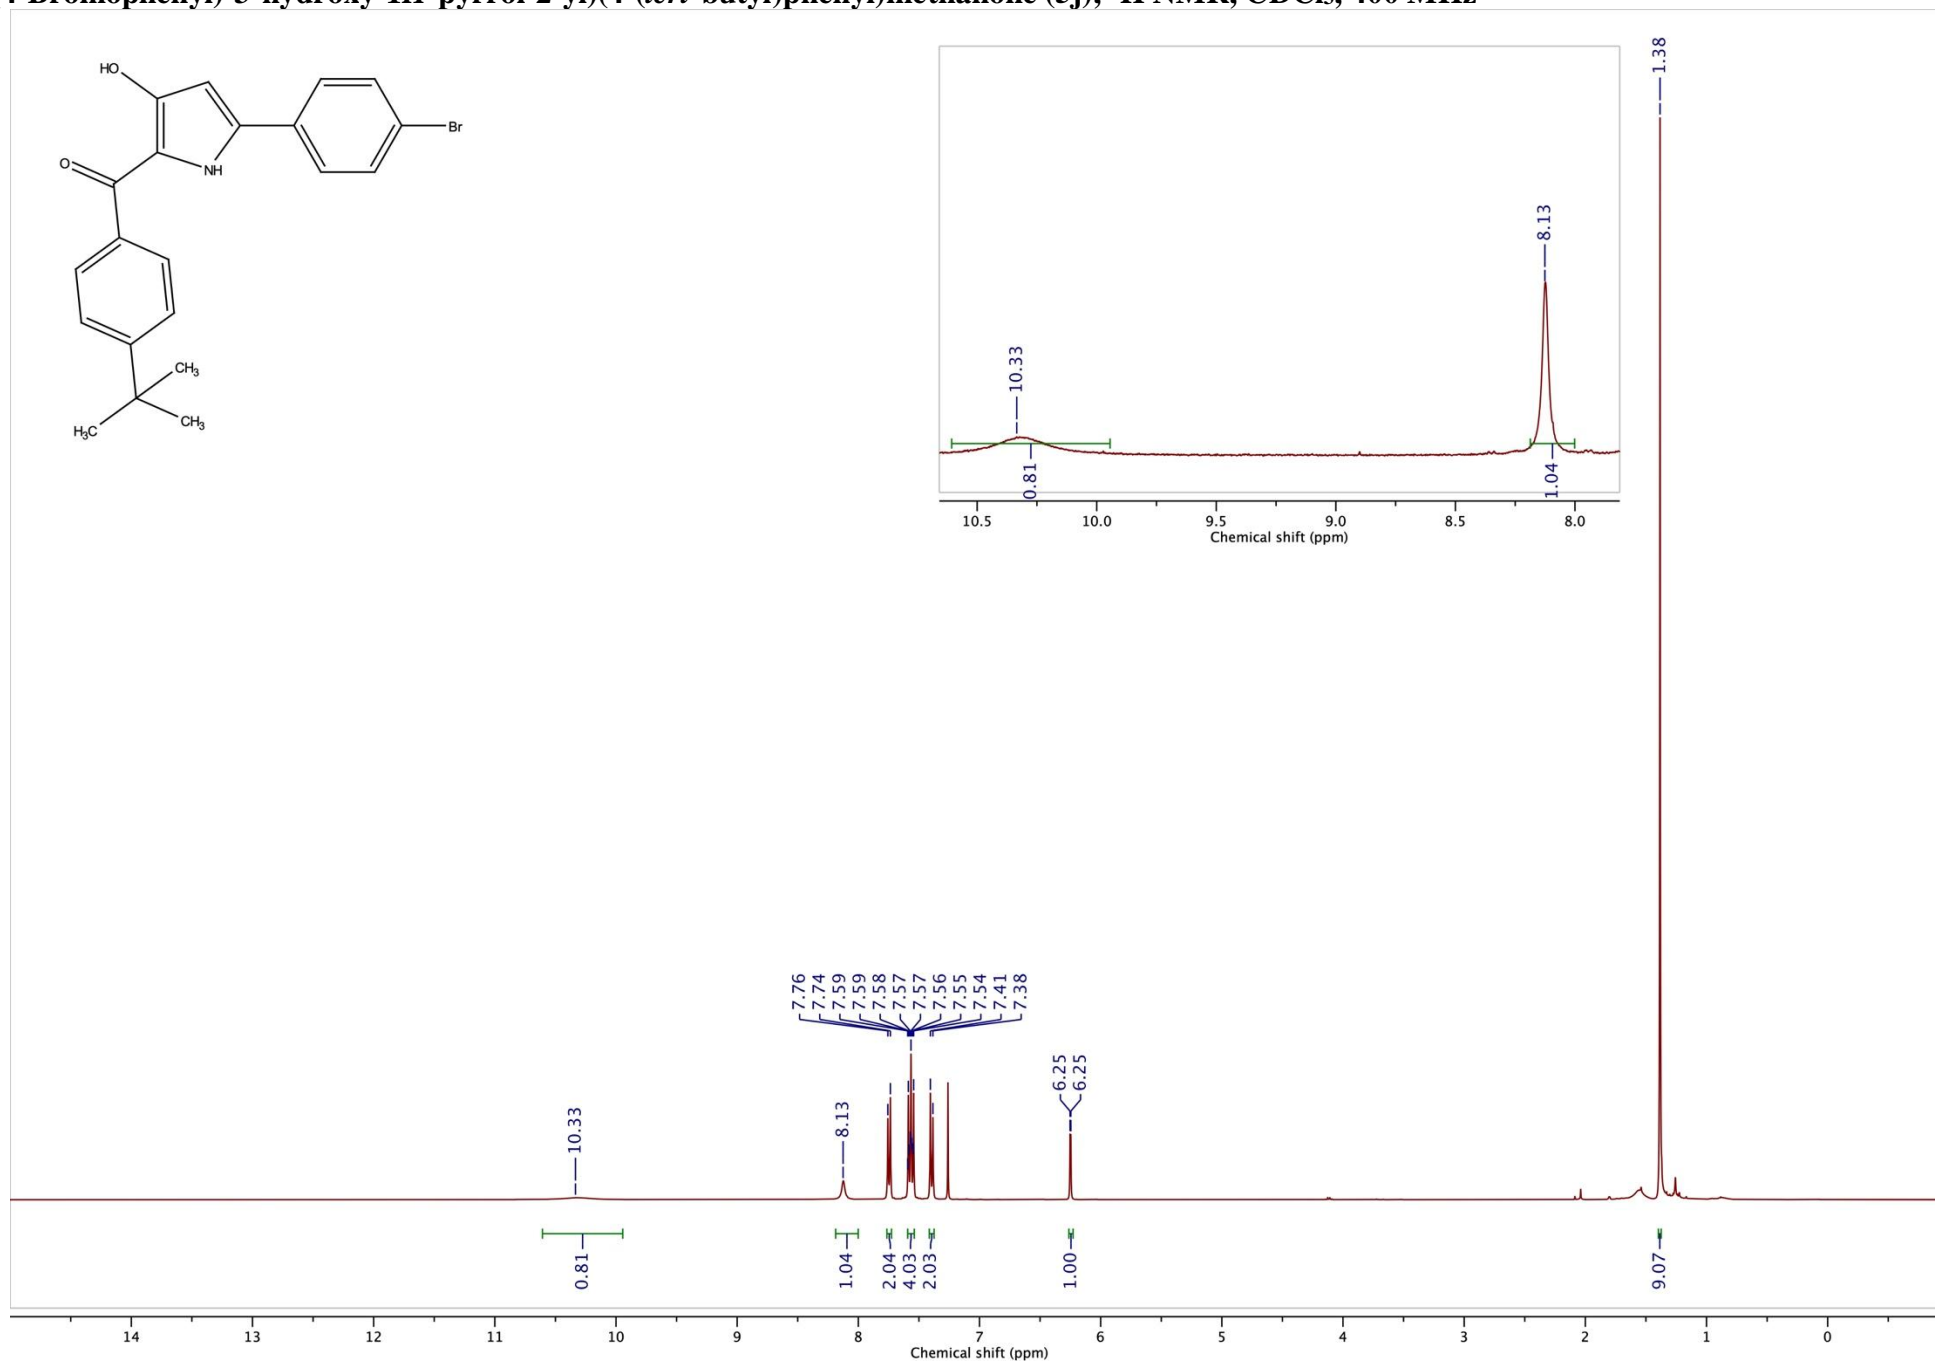

(5-(4-Bromophenyl)-3-hydroxy-1H-pyrrol-2-yl)(4-(*tert*-butyl)phenyl)methanone (5j),  $^{13}\text{C}\{^1\text{H}\}$  NMR,  $\text{CDCl}_3$ , 100 MHz

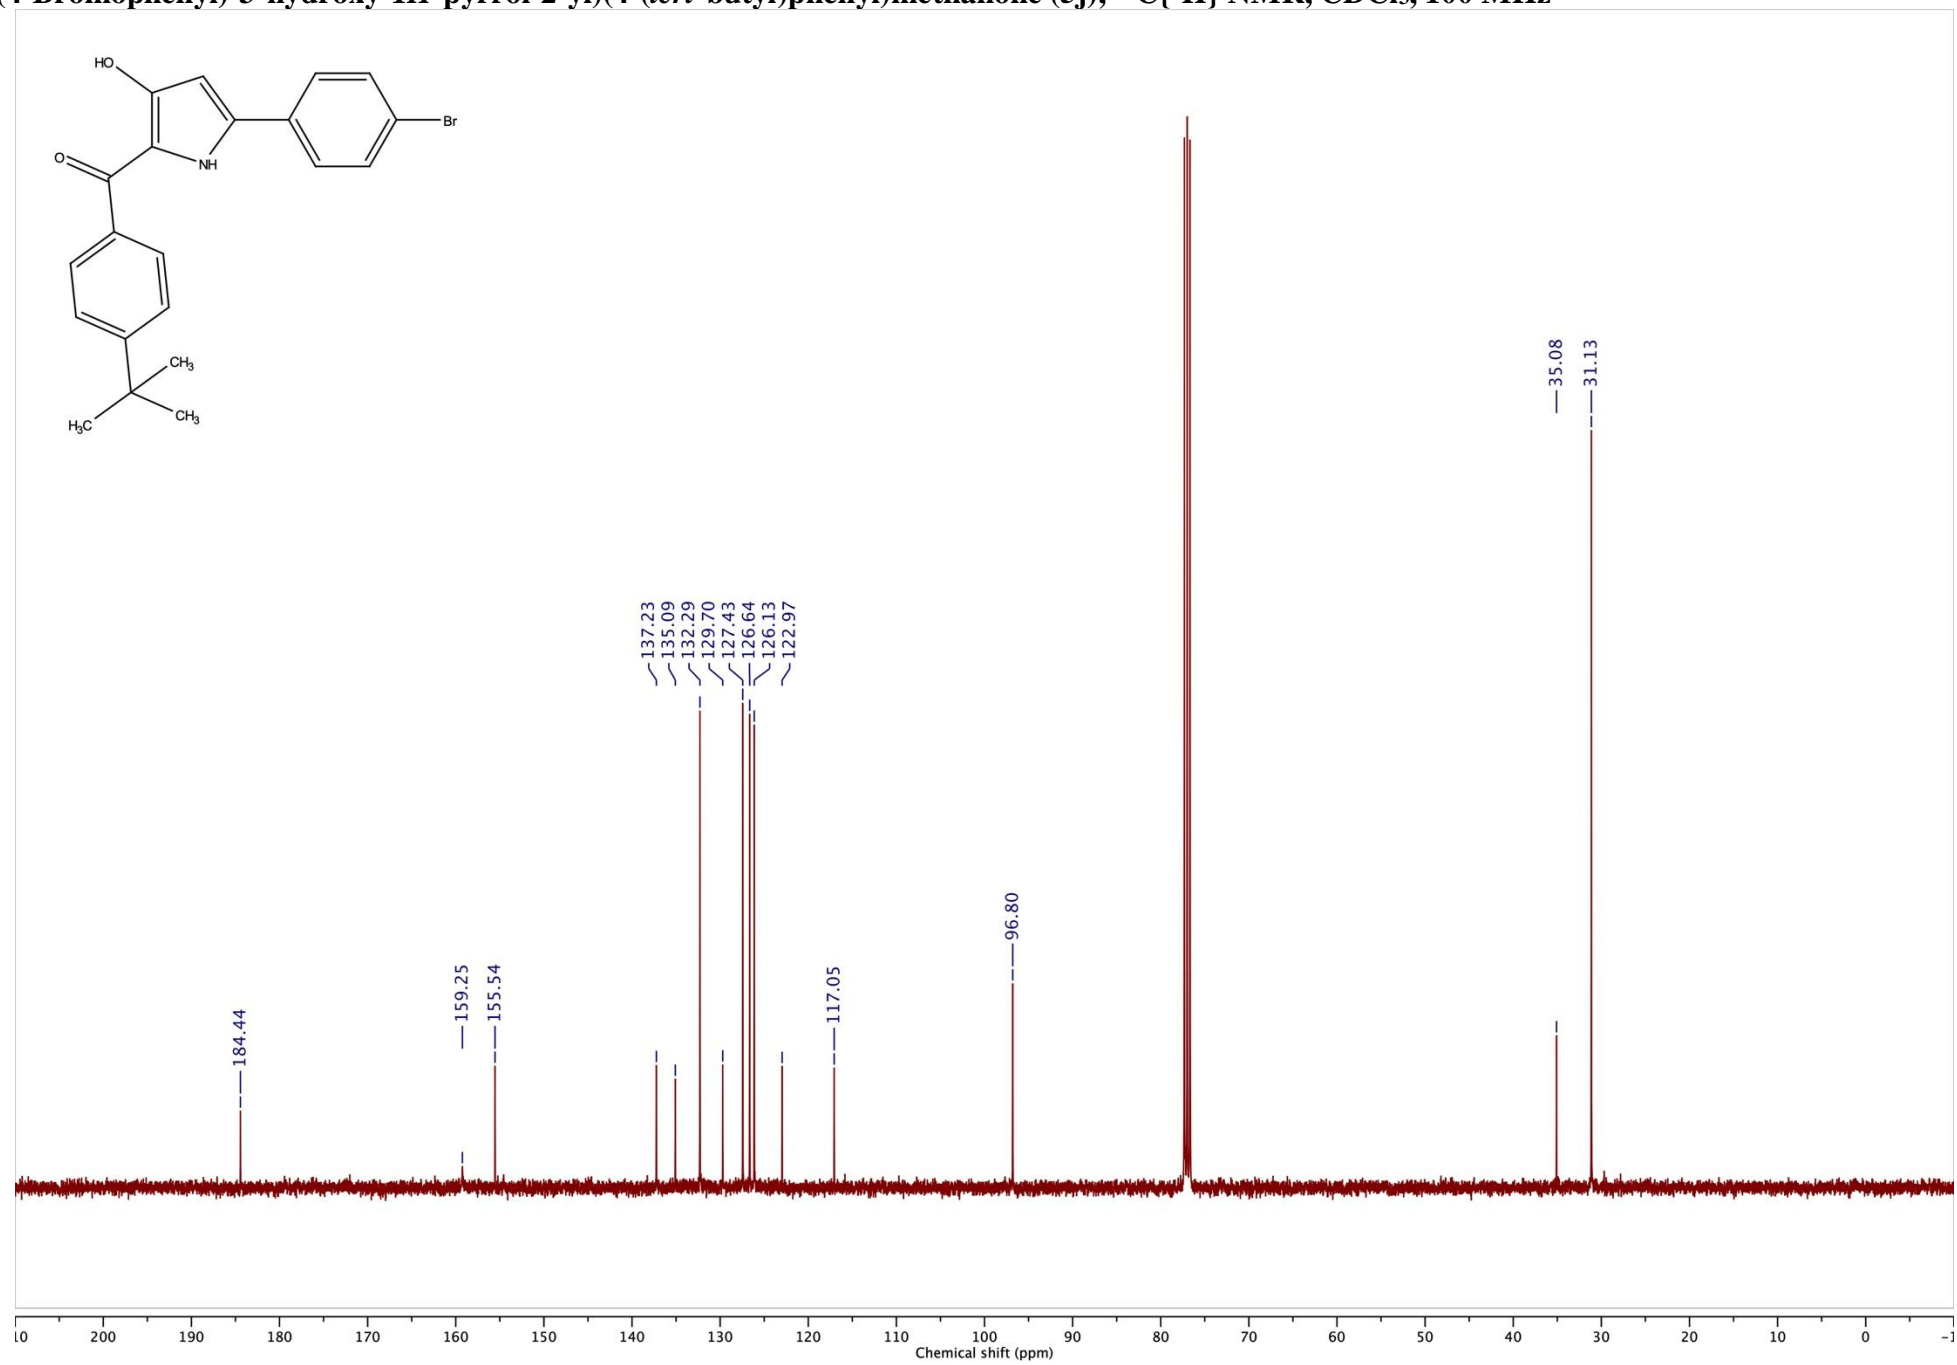

**(5-(4-Bromophenyl)-3-hydroxy-1H-pyrrol-2-yl)(4-(tert-butyl)phenyl)methanone (5j), DEPT, CDCl<sub>3</sub>, 100 MHz**

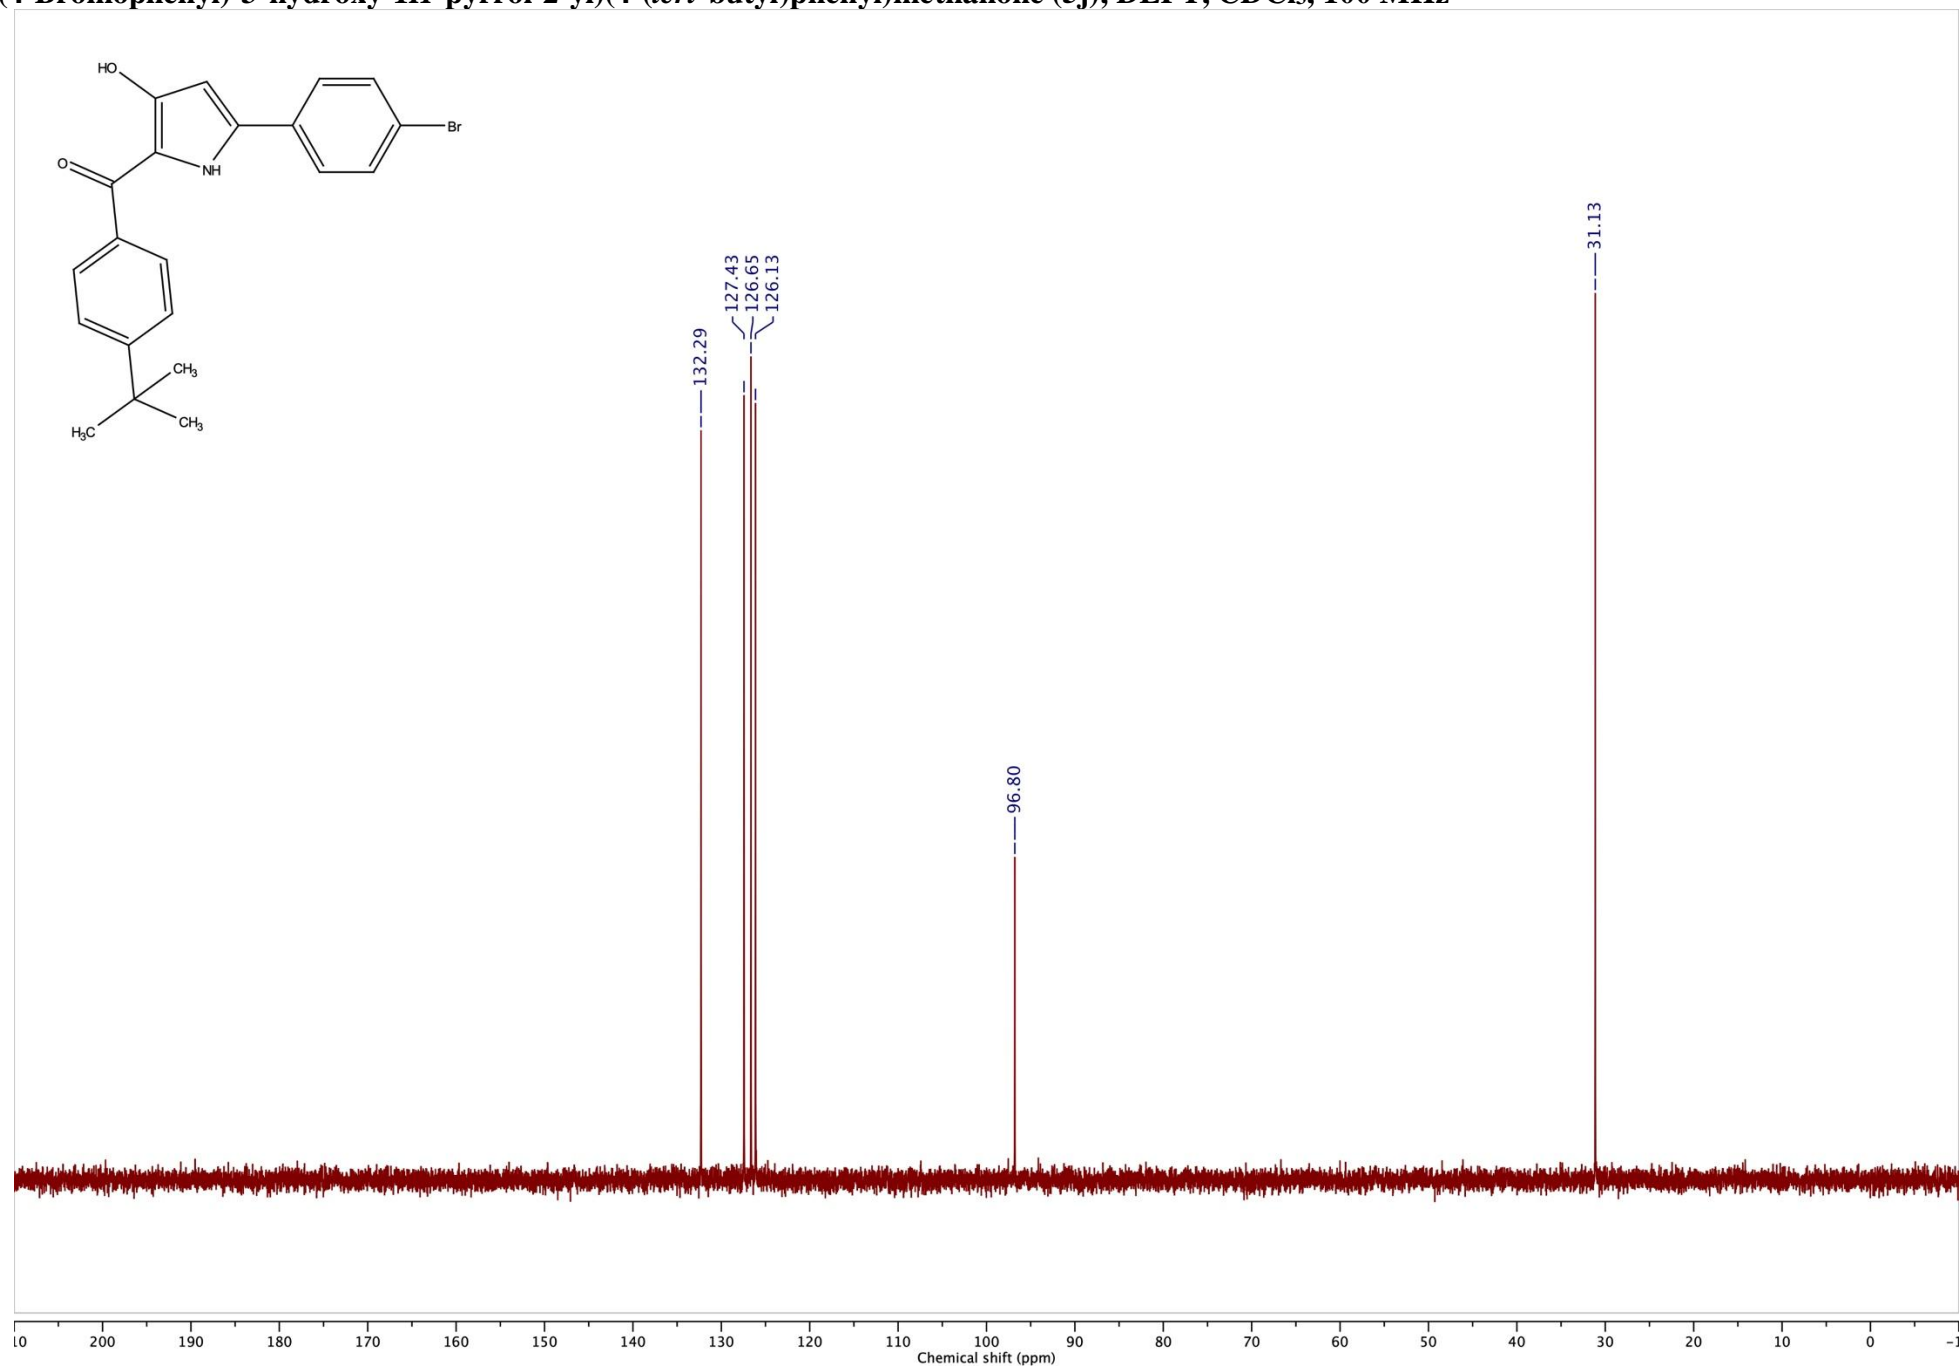

(5-(3-Bromophenyl)-3-hydroxy-1H-pyrrol-2-yl)(4-fluorophenyl)methanone (5k), <sup>1</sup>H NMR, CDCl<sub>3</sub>, 400 MHz

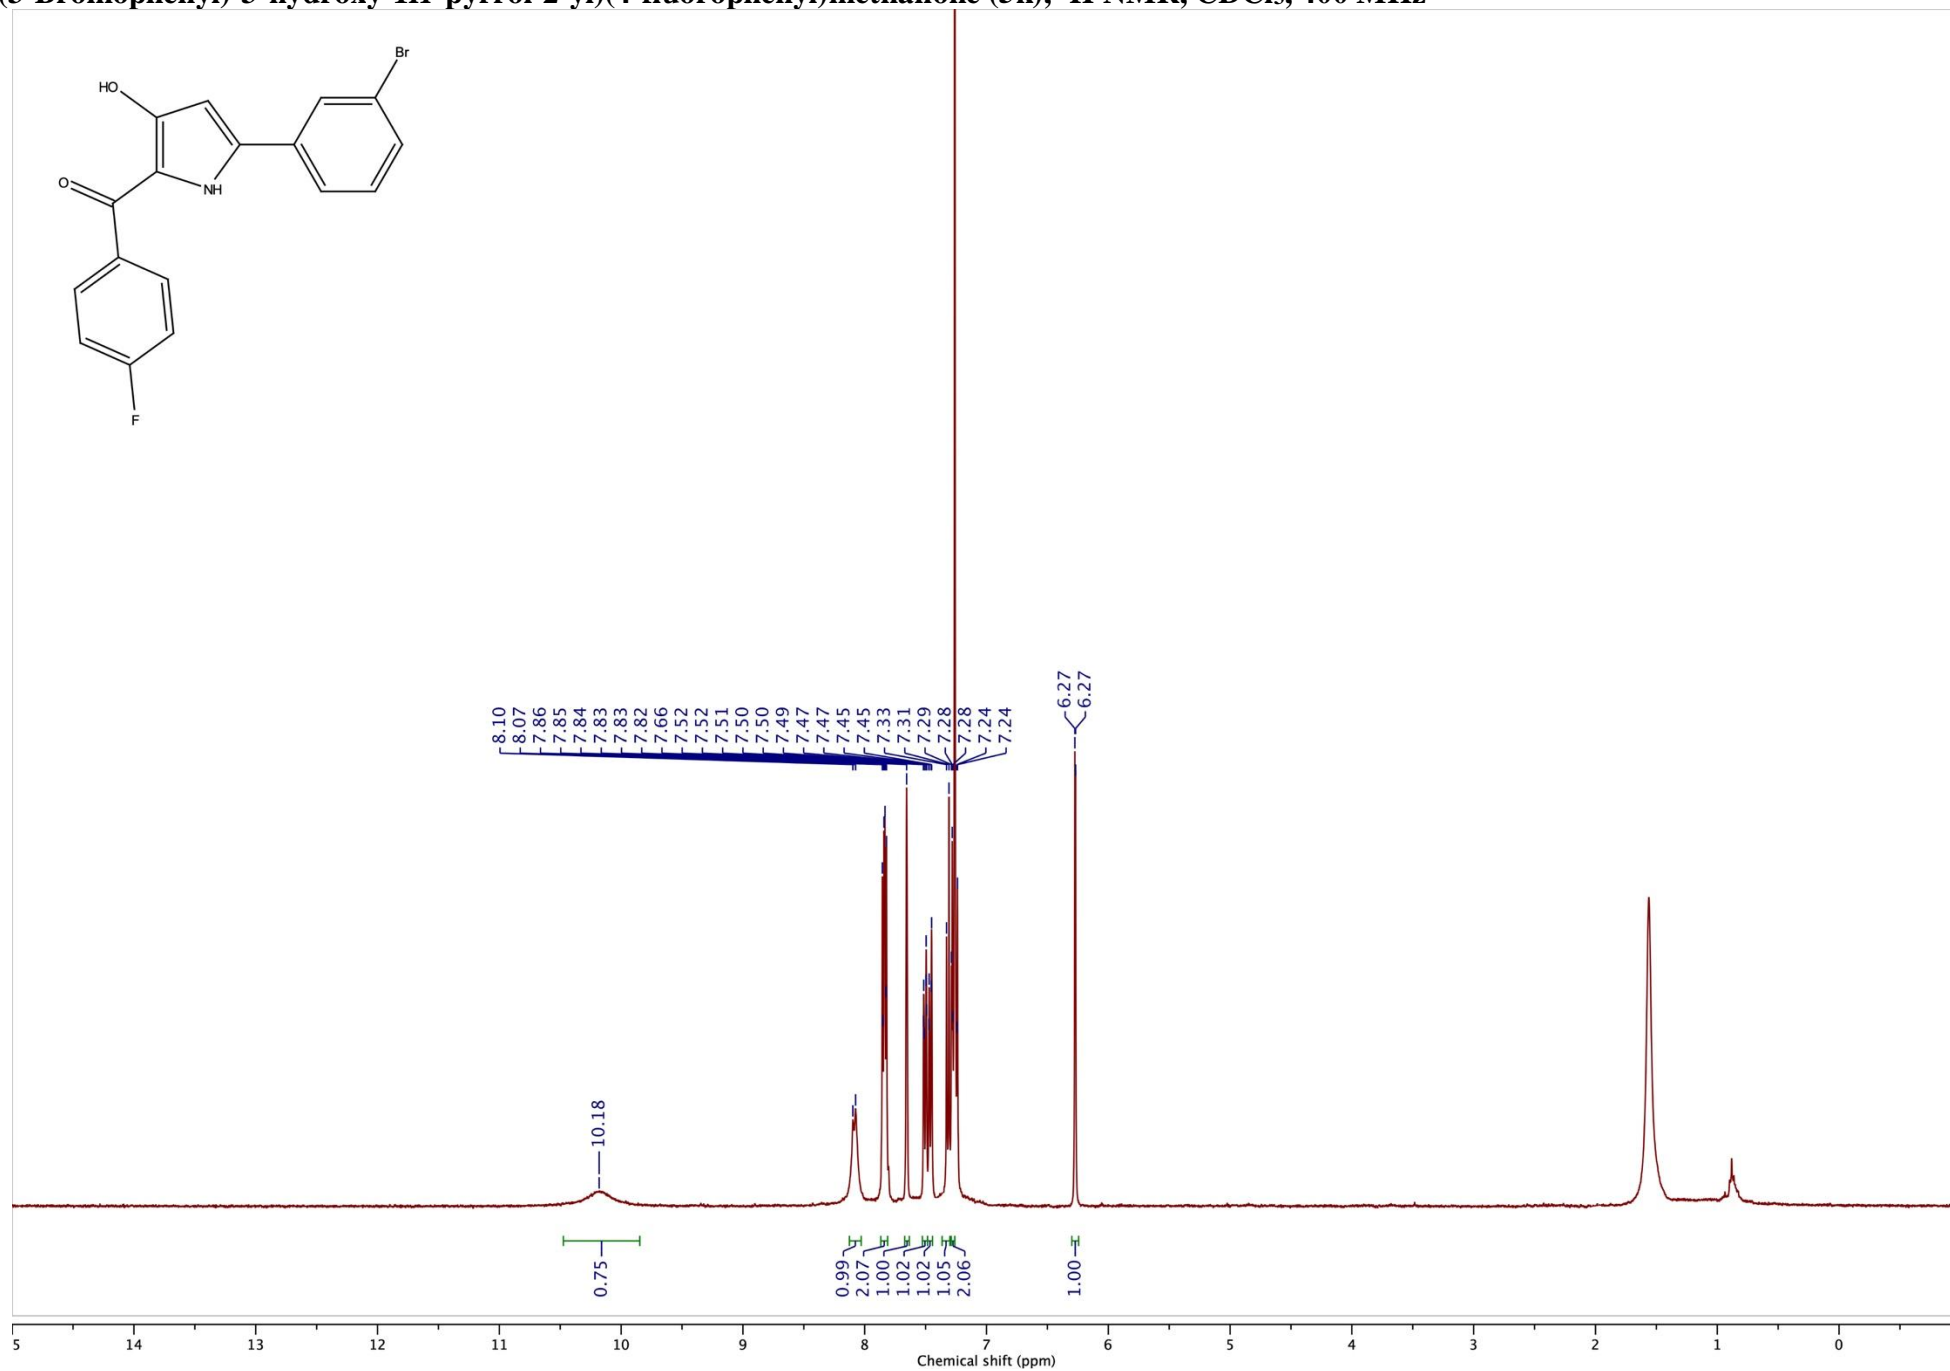

(5-(3-Bromophenyl)-3-hydroxy-1H-pyrrol-2-yl)(4-fluorophenyl)methanone (5k),  $^{13}\text{C}\{^1\text{H}\}$  NMR,  $\text{CDCl}_3$ , 100 MHz

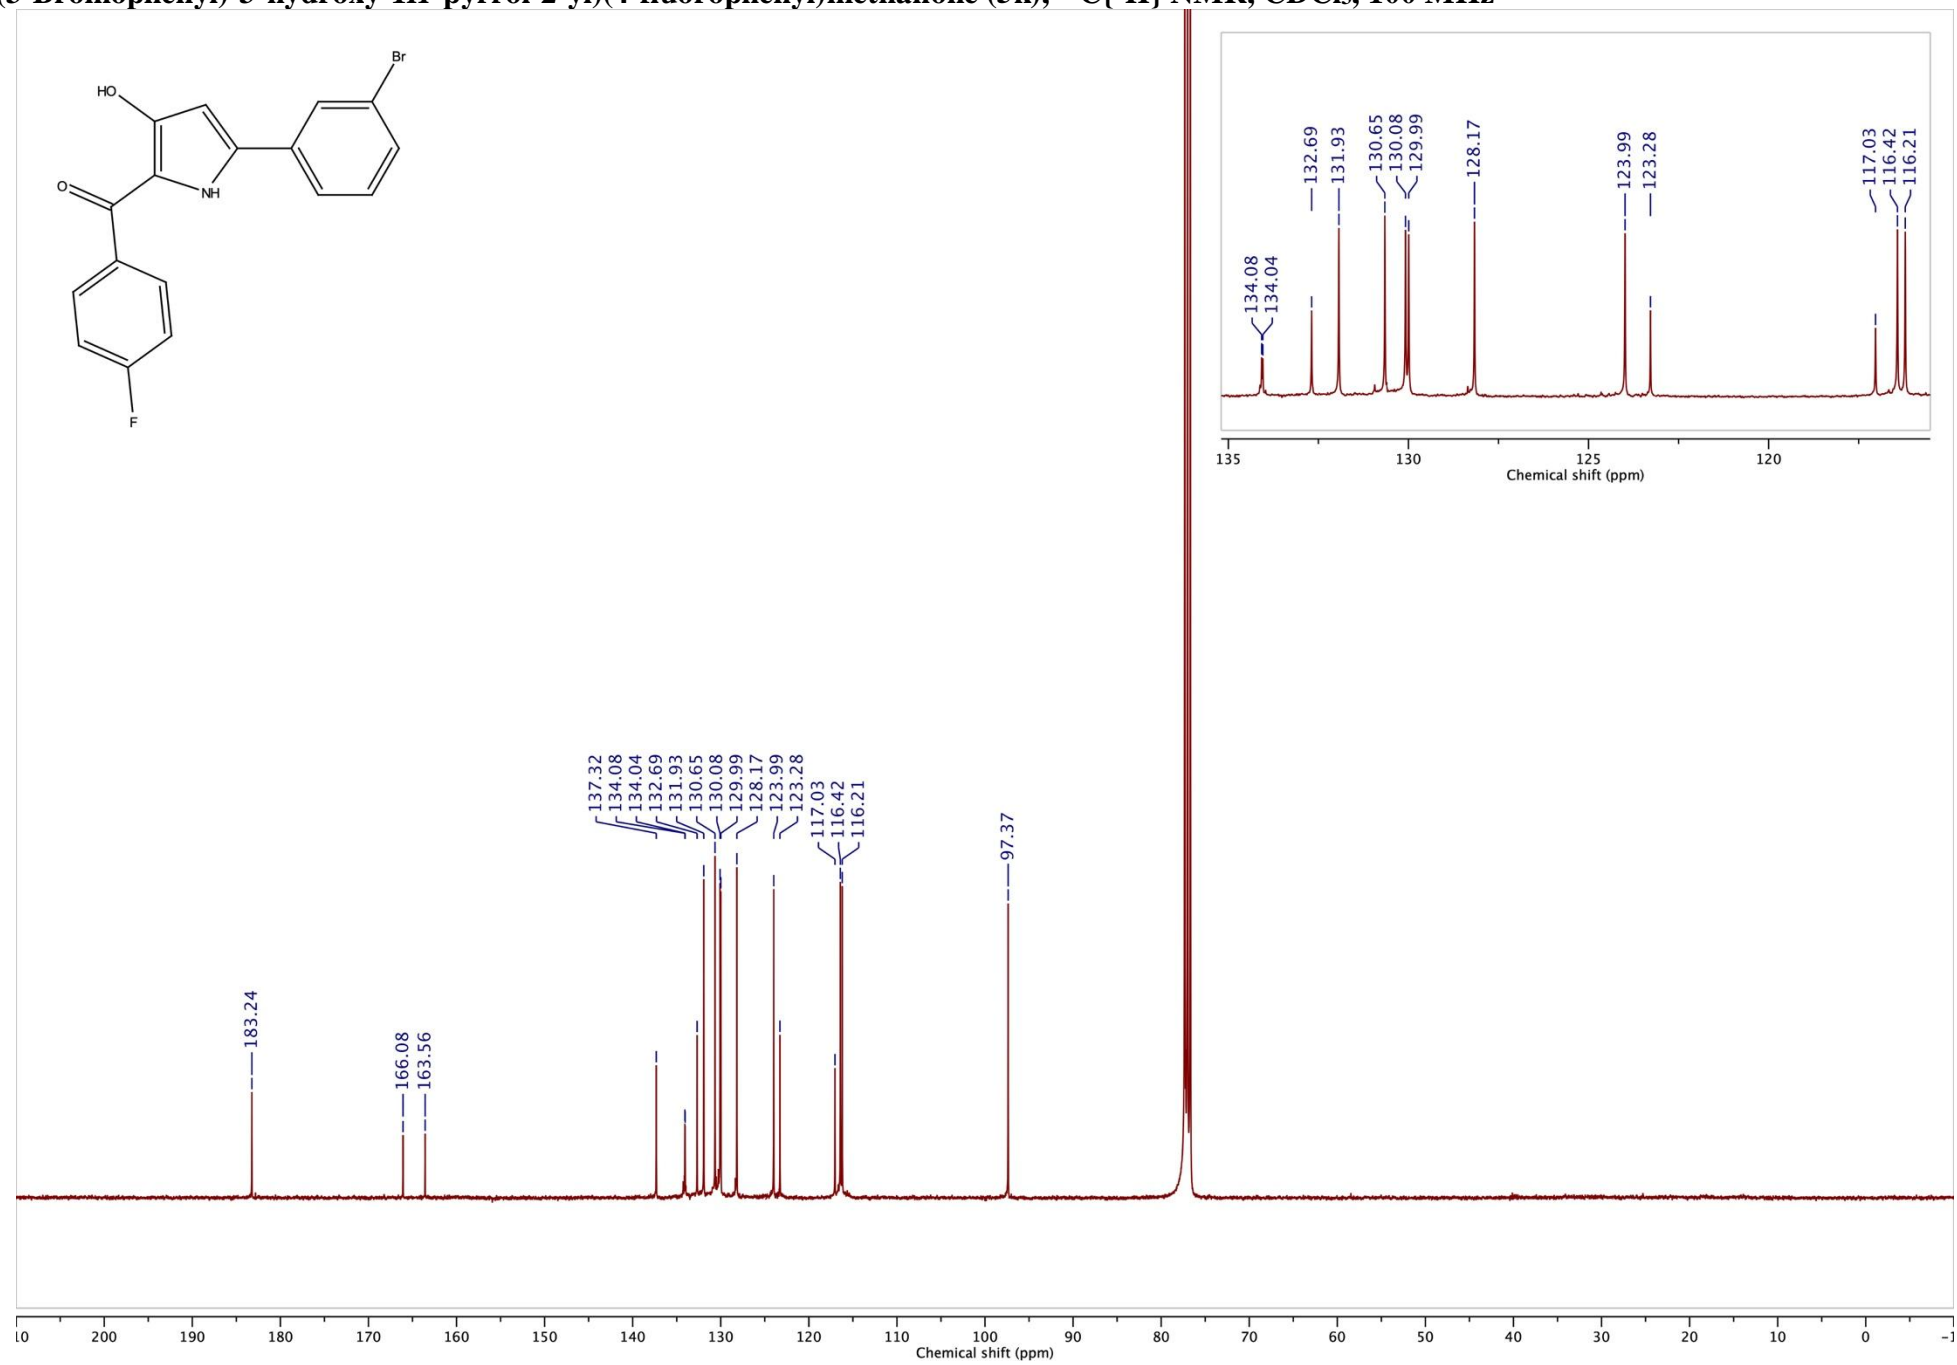

**(5-(3-Bromophenyl)-3-hydroxy-1H-pyrrol-2-yl)(4-fluorophenyl)methanone (5k), DEPT, CDCl<sub>3</sub>, 100 MHz**

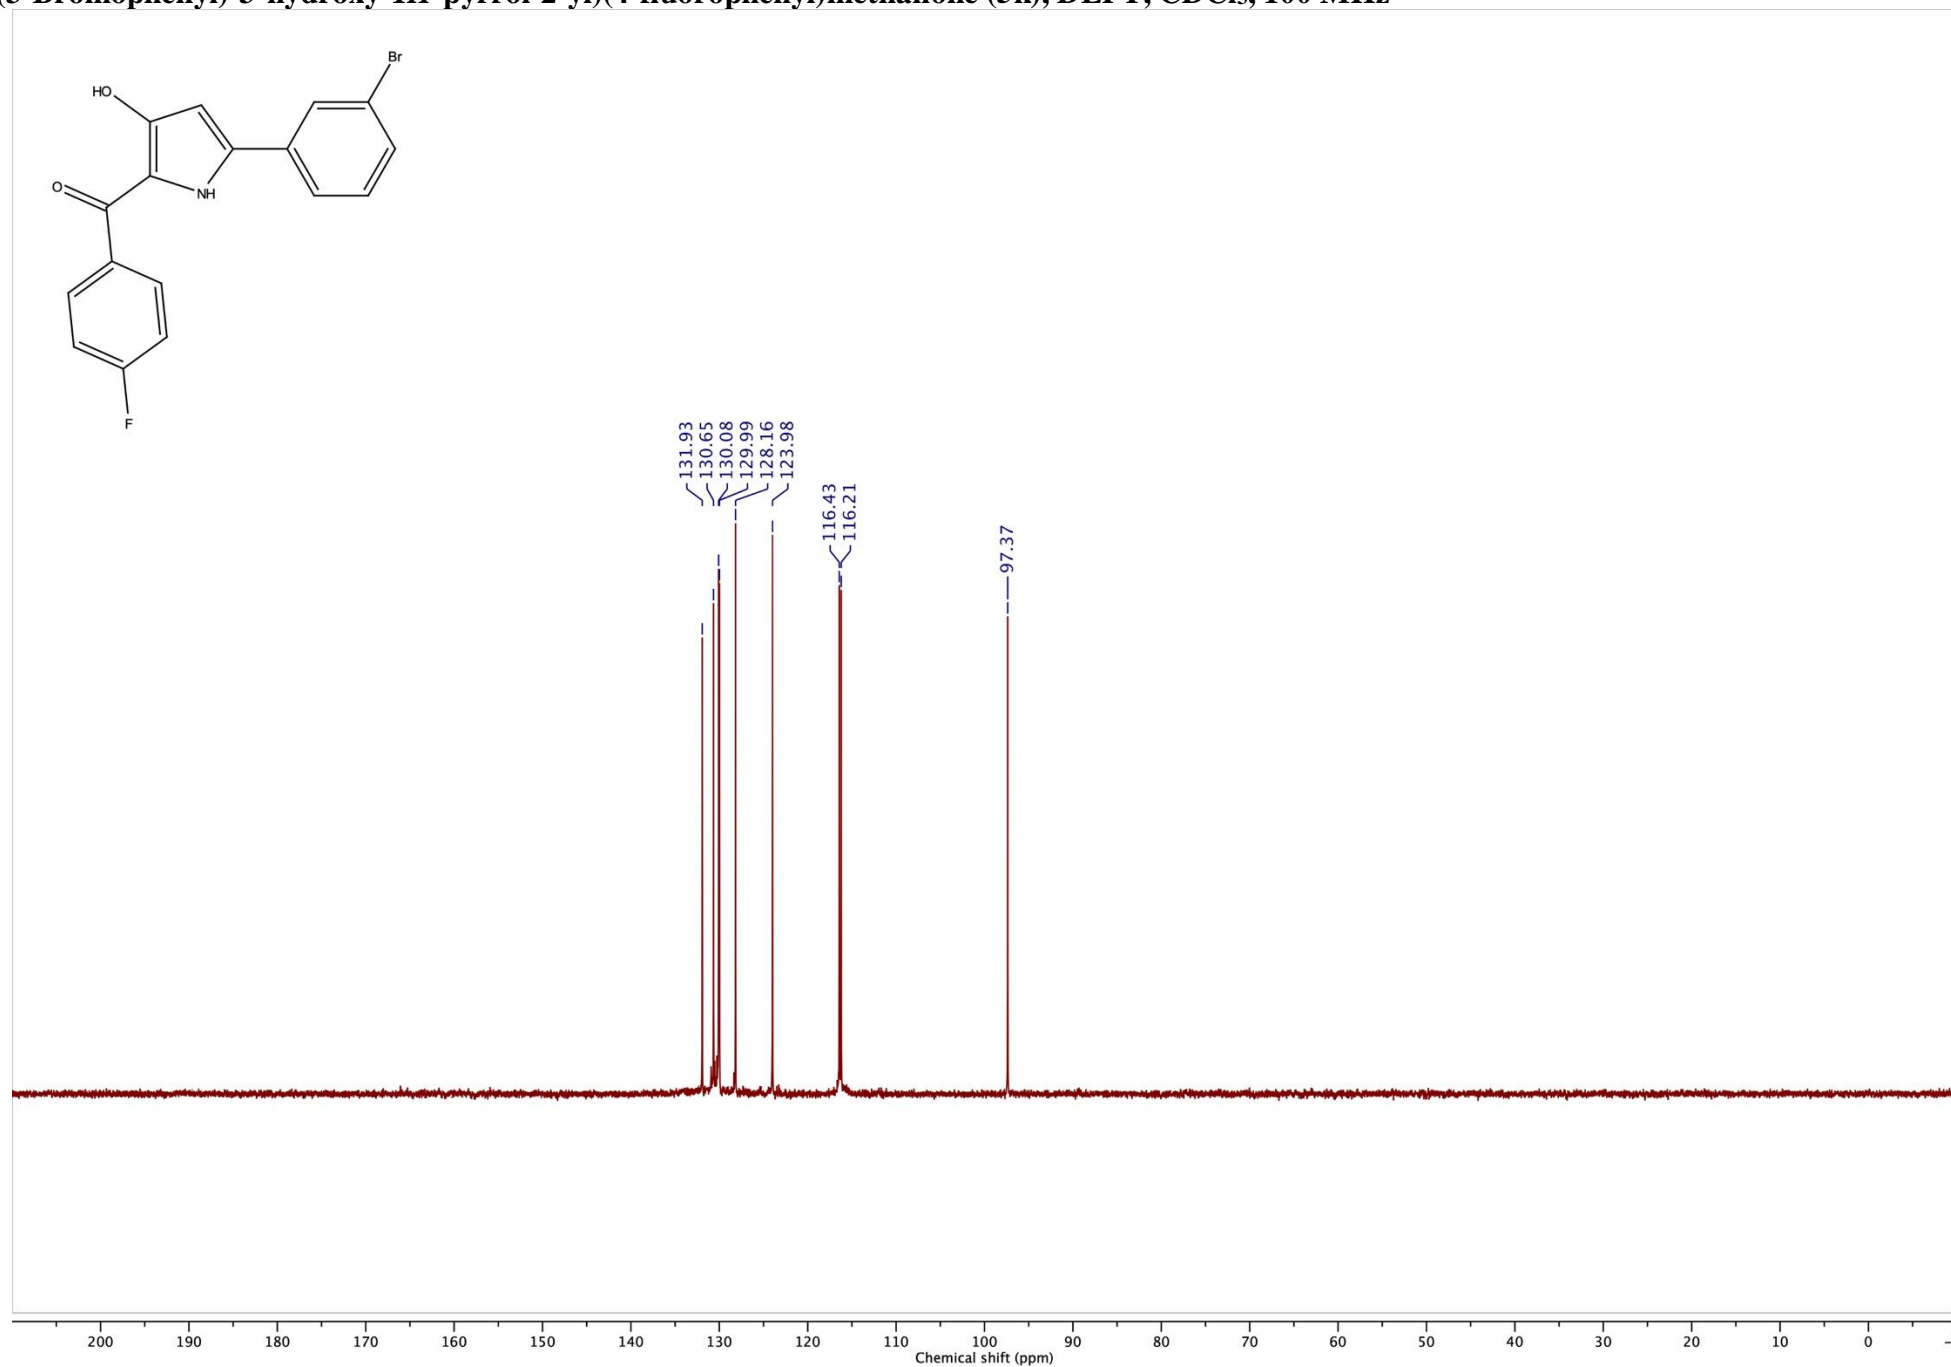

(4-Chlorophenyl)(3-hydroxy-5-(*p*-tolyl)-1*H*-pyrrol-2-yl)methanone (5l), <sup>1</sup>H NMR, CDCl<sub>3</sub>, 400 MHz

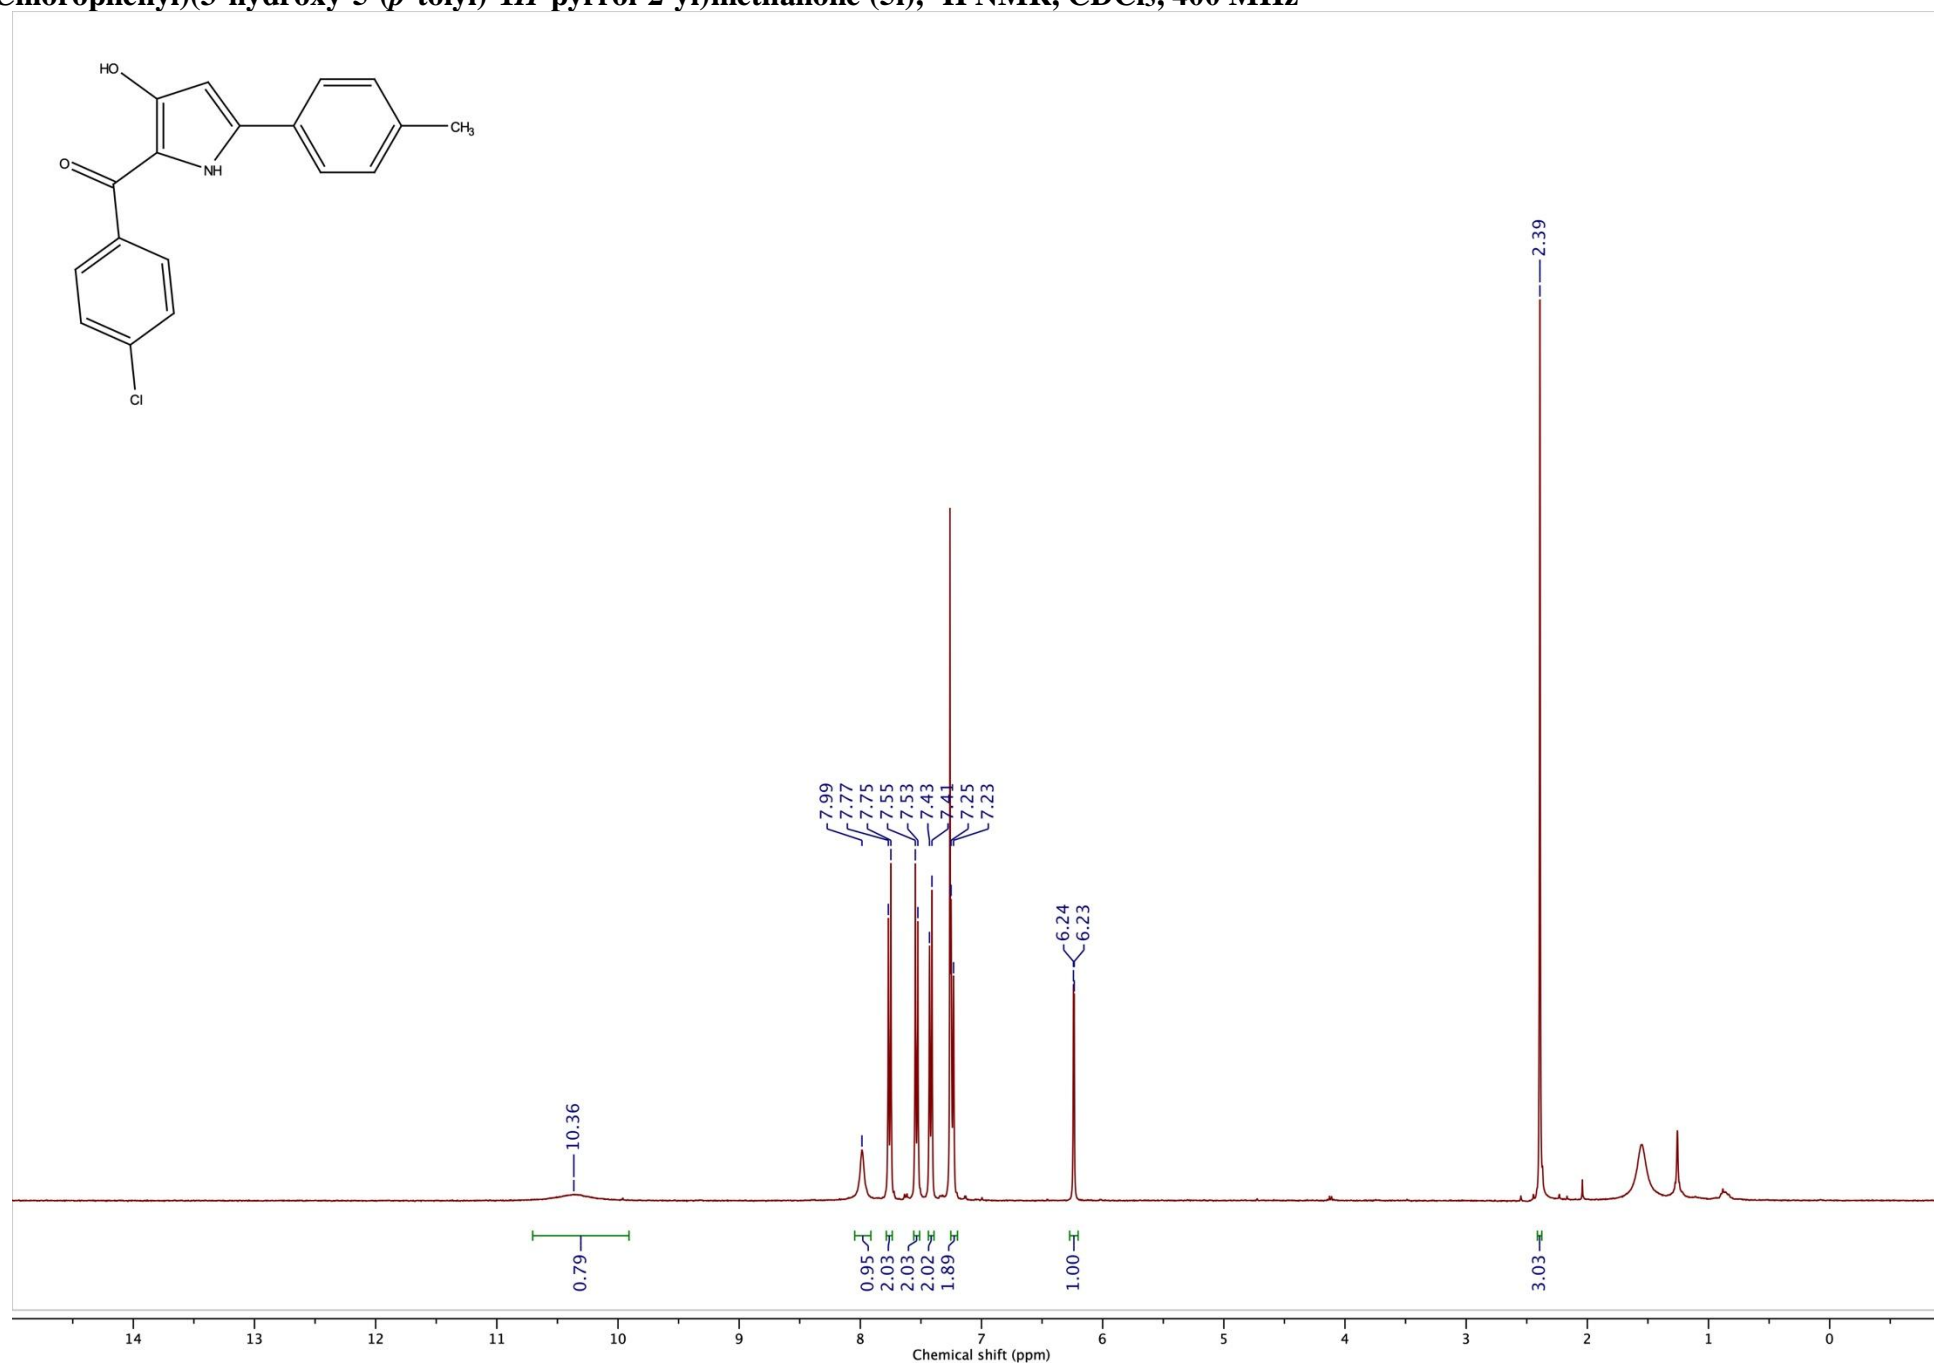

(4-Chlorophenyl)(3-hydroxy-5-(*p*-tolyl)-1*H*-pyrrol-2-yl)methanone (5l),  $^{13}\text{C}\{^1\text{H}\}$  NMR,  $\text{CDCl}_3$ , 100 MHz

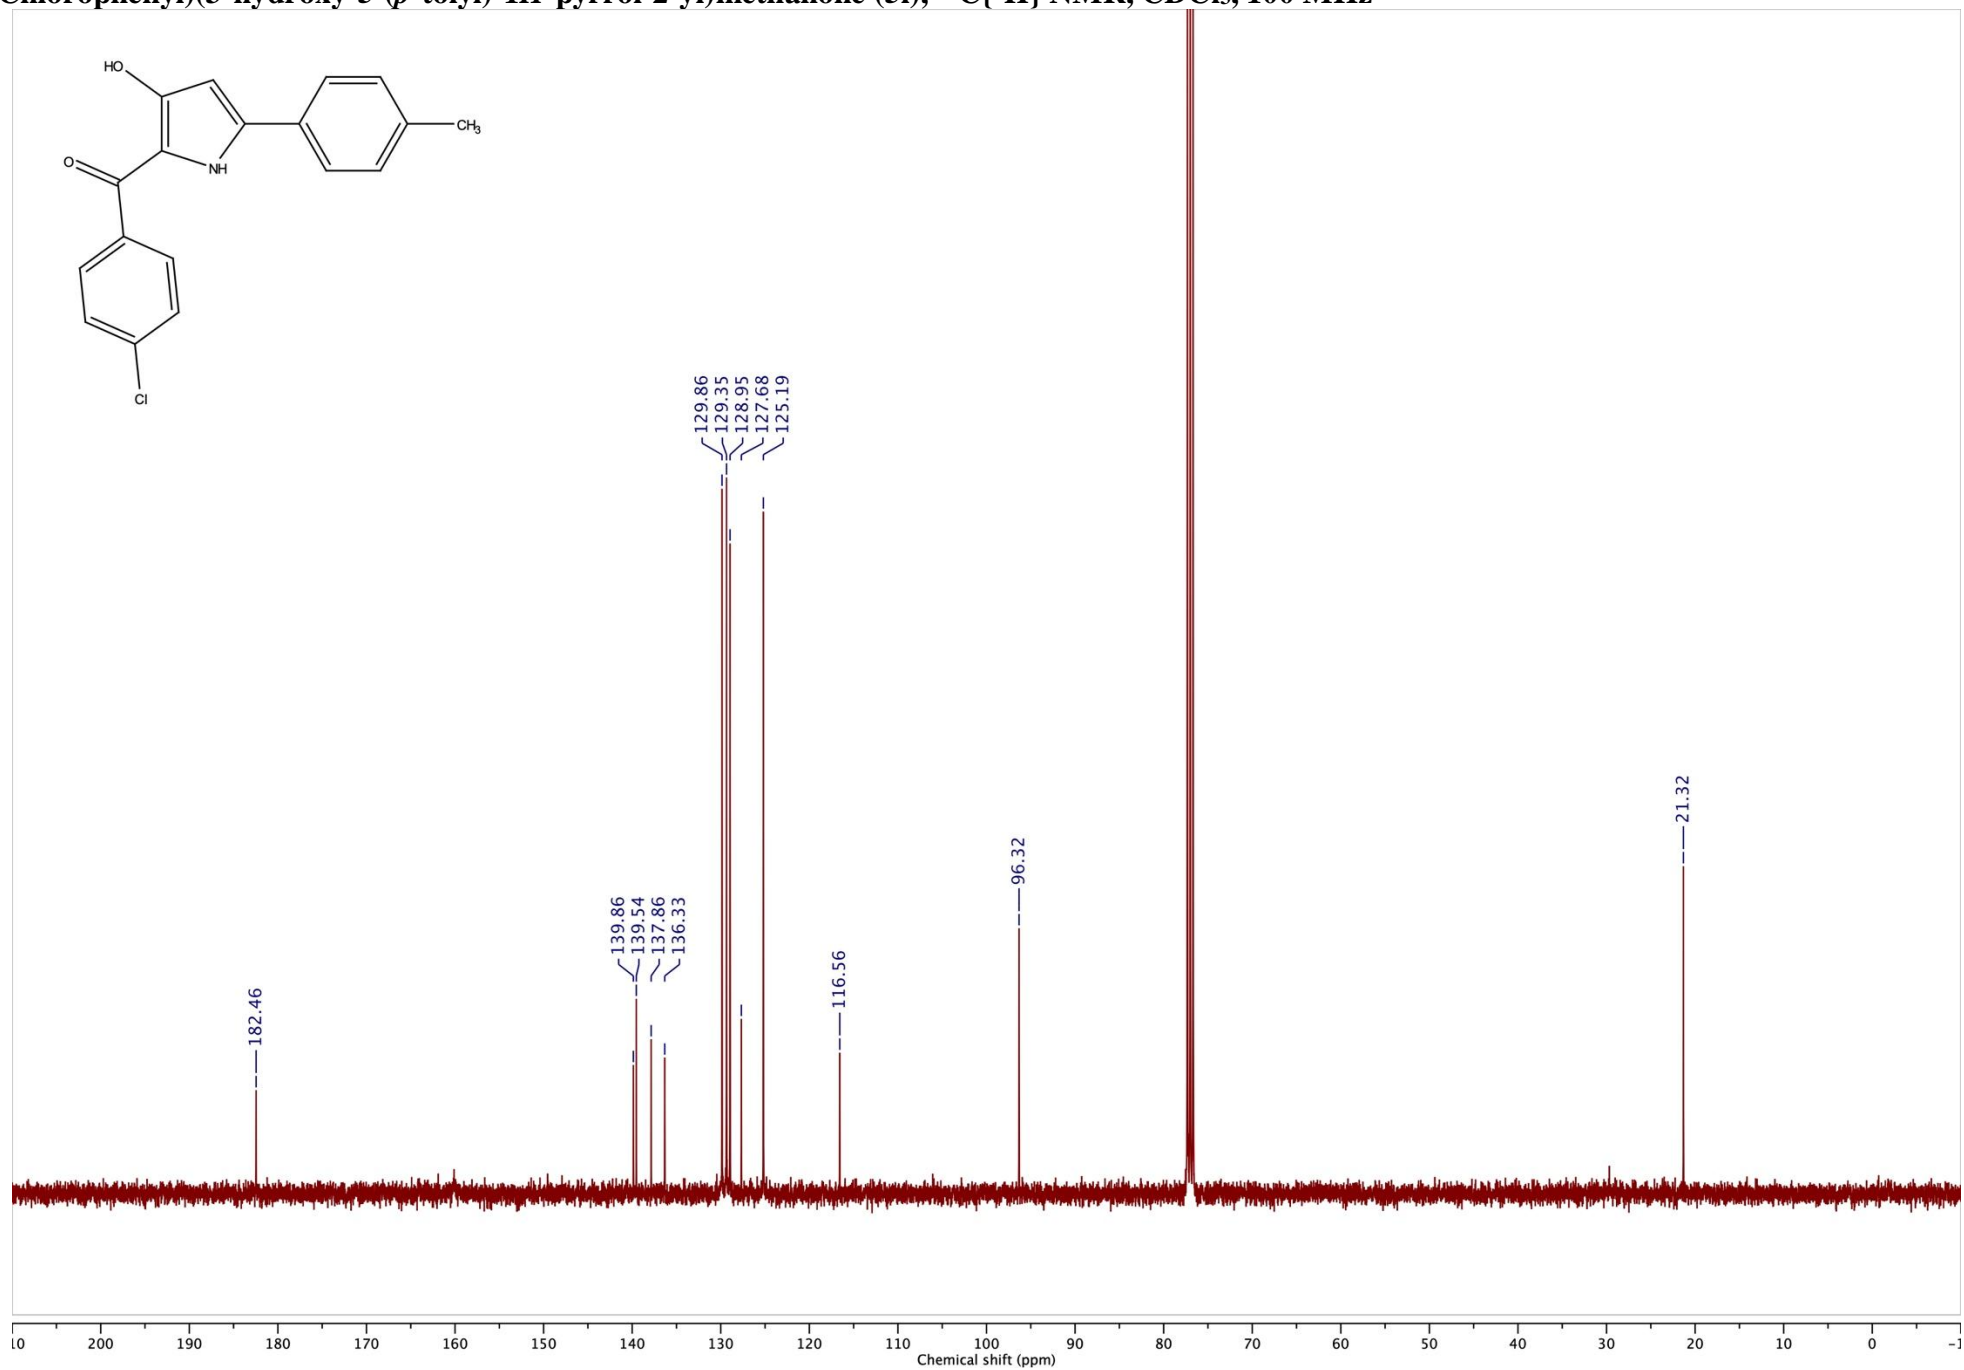

(4-Chlorophenyl)(3-hydroxy-5-(*p*-tolyl)-1*H*-pyrrol-2-yl)methanone (5l), DEPT, CDCl<sub>3</sub>, 100 MHz

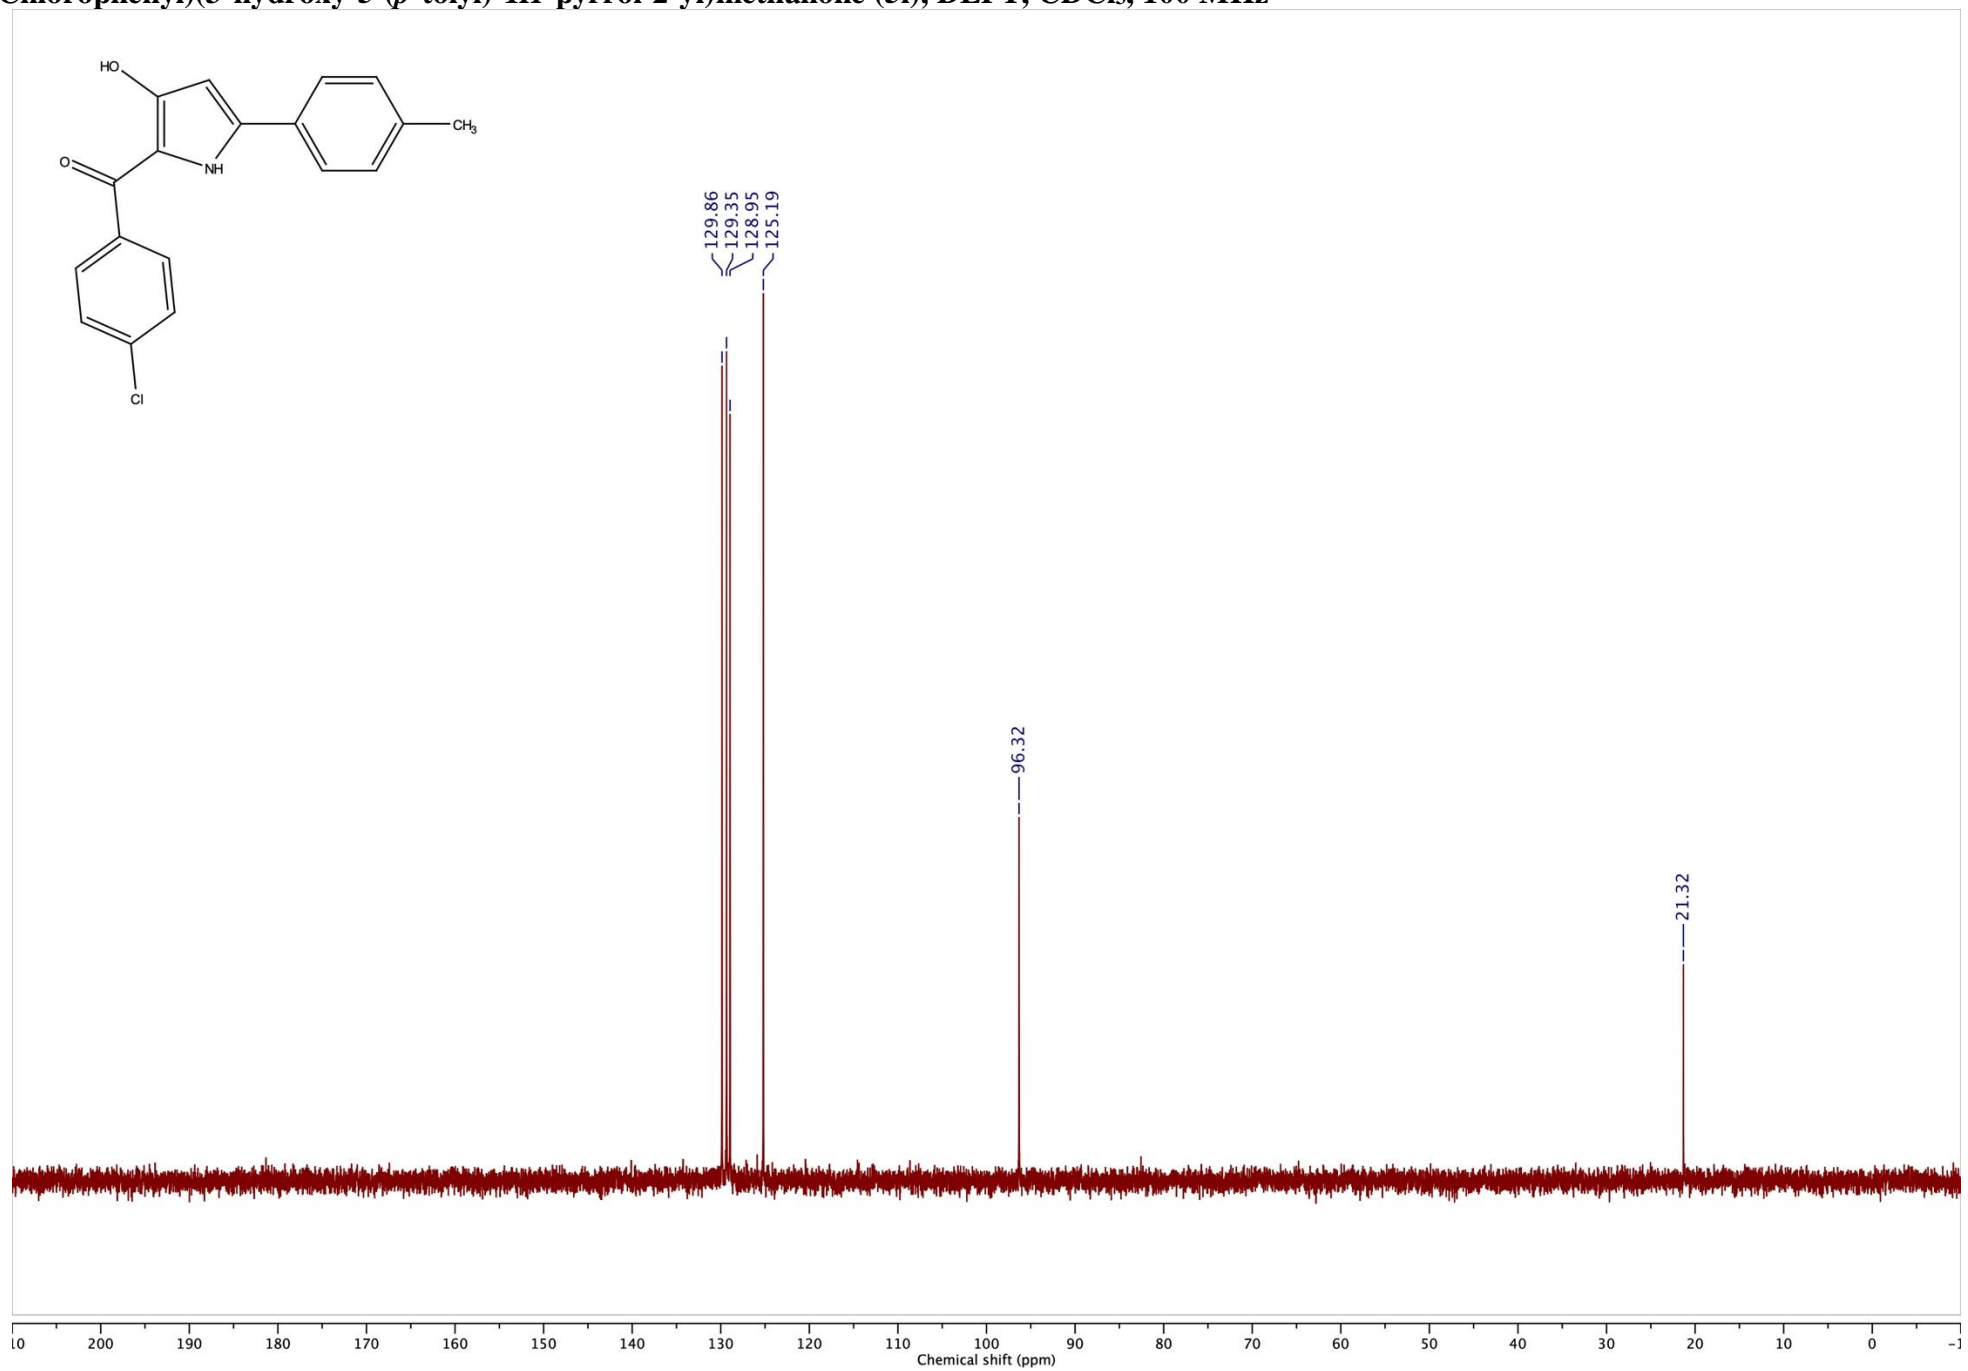

(4-Bromophenyl)(5-(2-chlorophenyl)-3-hydroxy-1H-pyrrol-2-yl)methanone (5m), <sup>1</sup>H NMR, CDCl<sub>3</sub>, 400 MHz

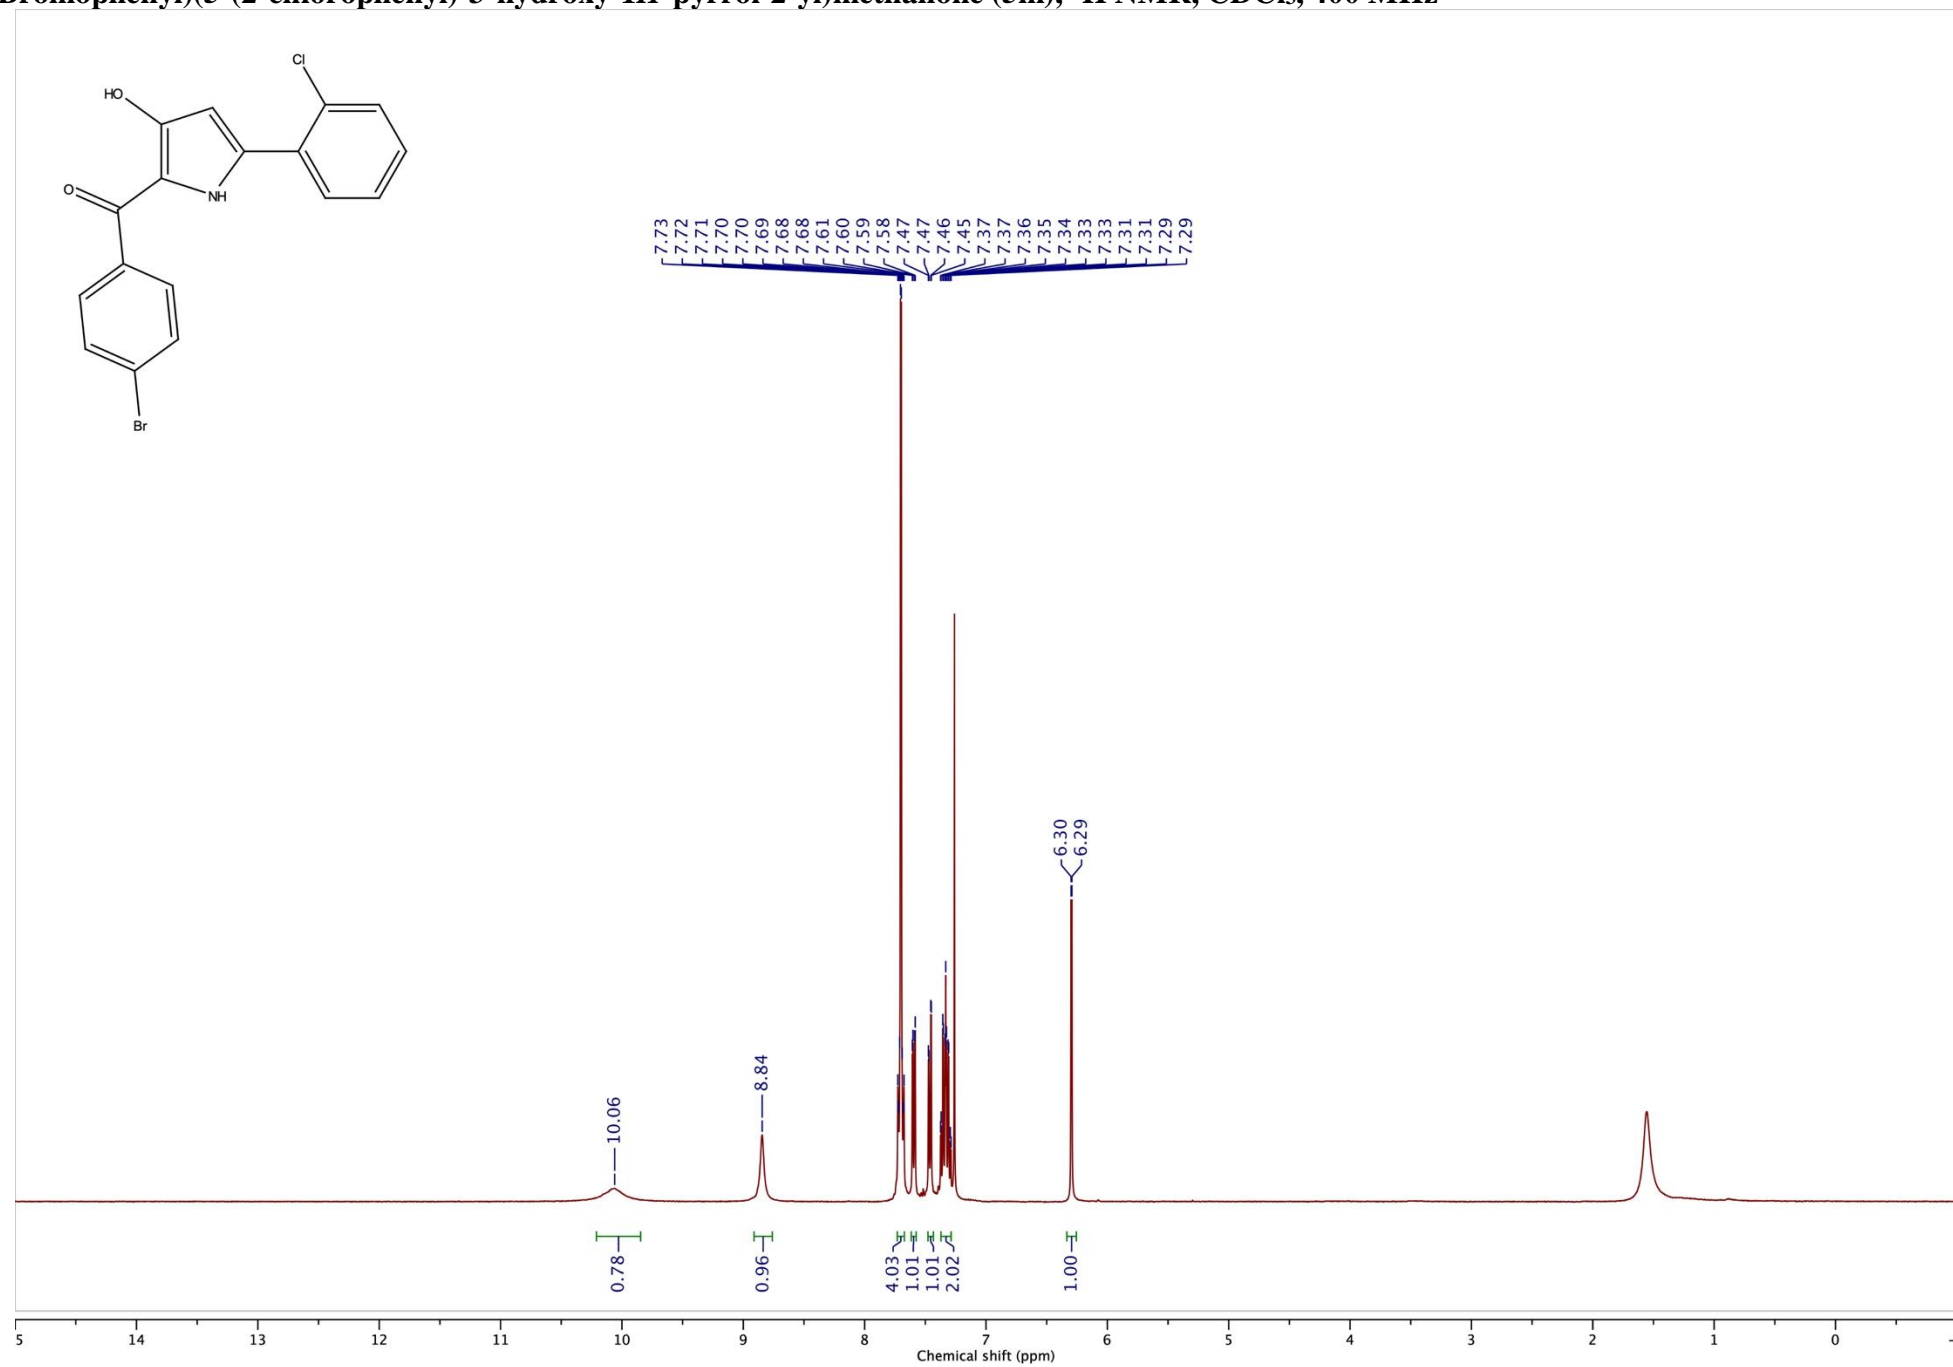

(4-Bromophenyl)(5-(2-chlorophenyl)-3-hydroxy-1H-pyrrol-2-yl)methanone (5m),  $^{13}\text{C}\{^1\text{H}\}$  NMR,  $\text{CDCl}_3$ , 100 MHz

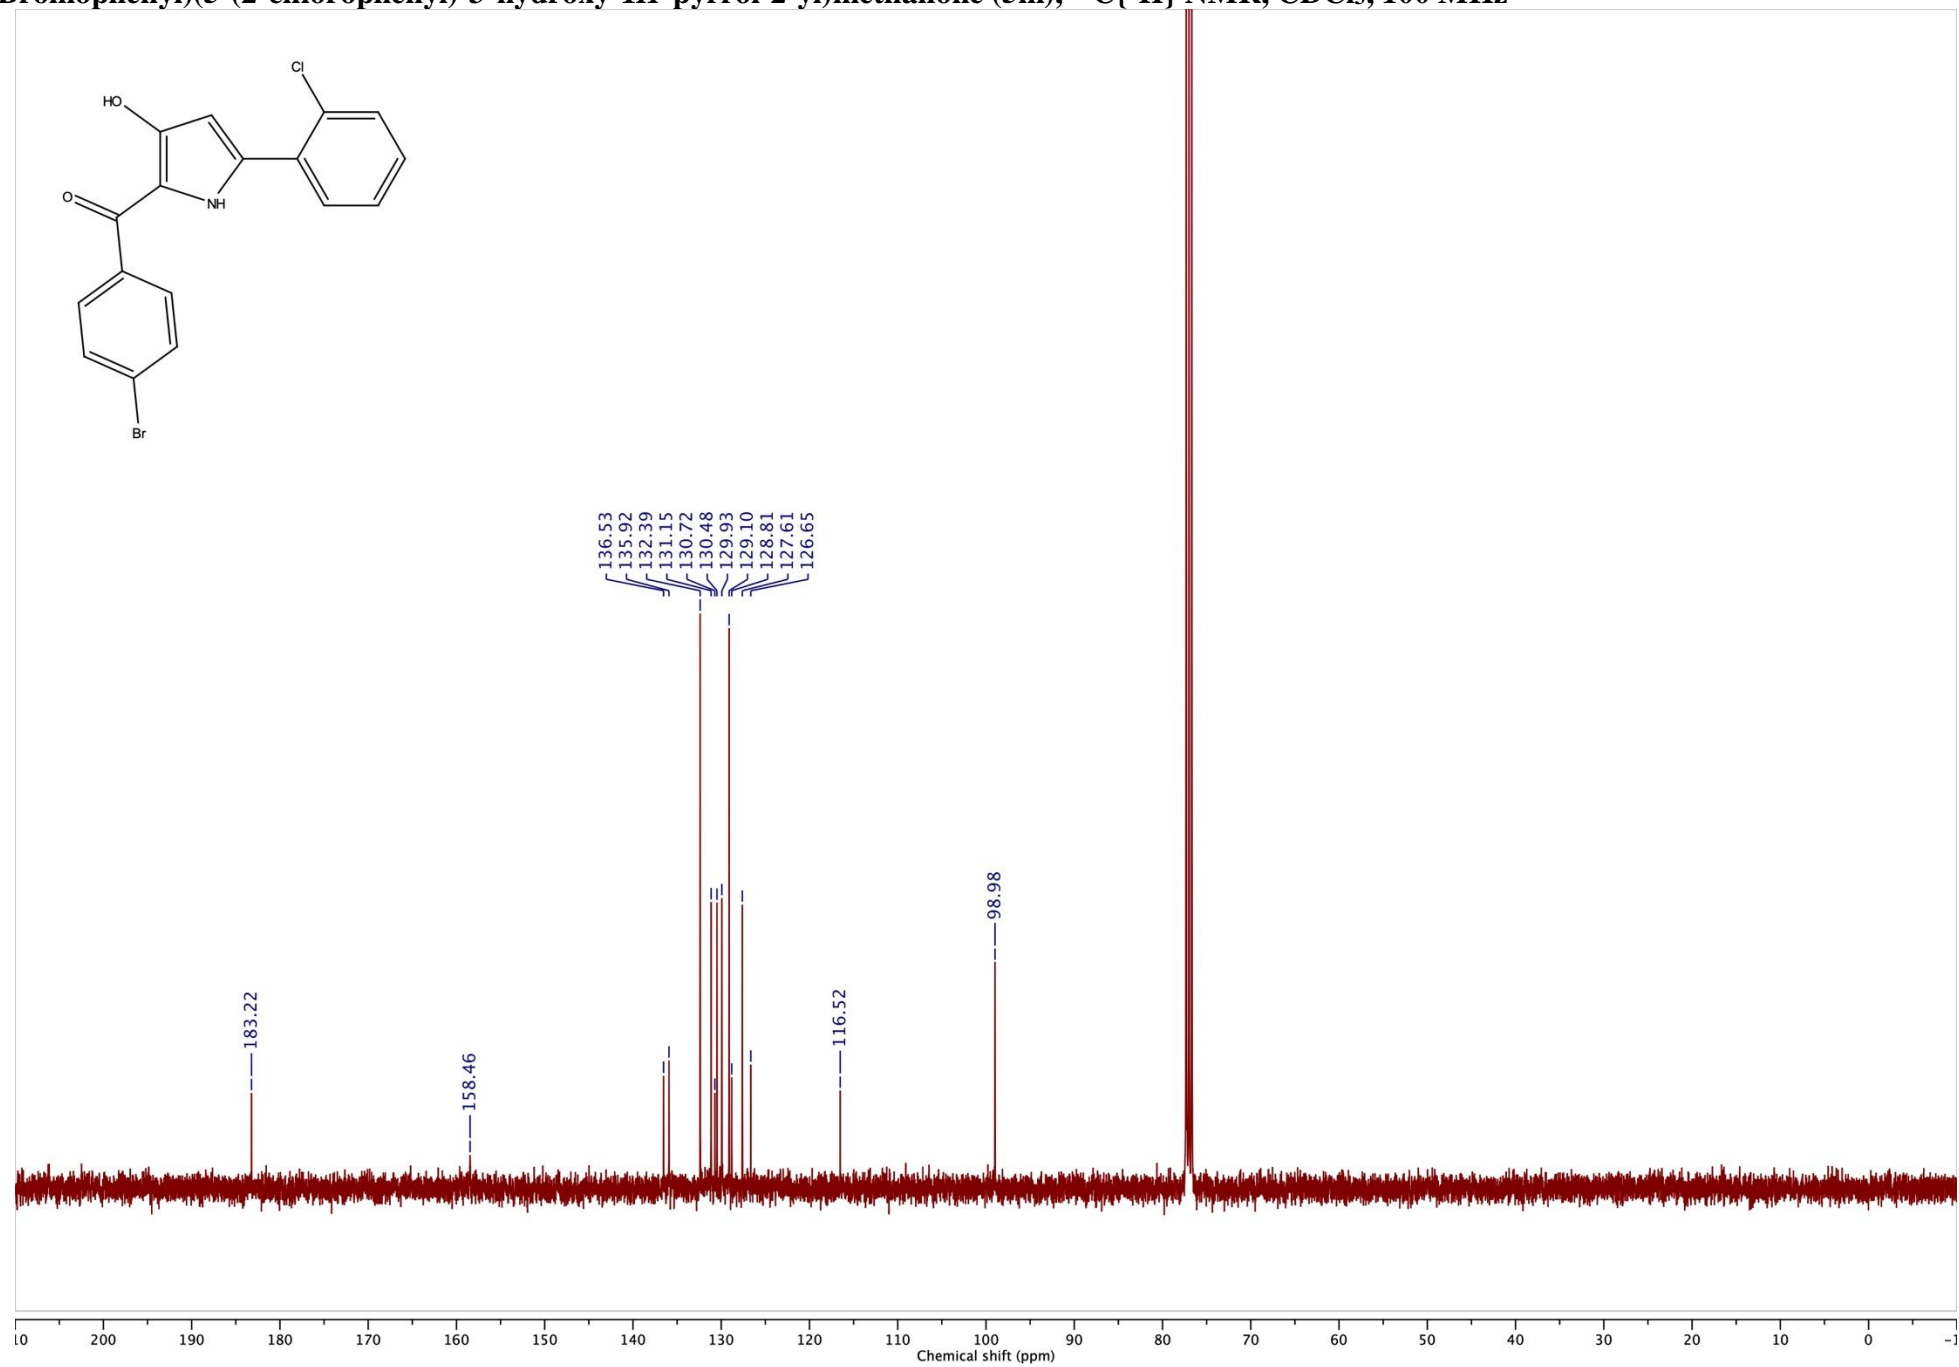

(4-Bromophenyl)(5-(2-chlorophenyl)-3-hydroxy-1H-pyrrol-2-yl)methanone (5m), DEPT, CDCl<sub>3</sub>, 100 MHz

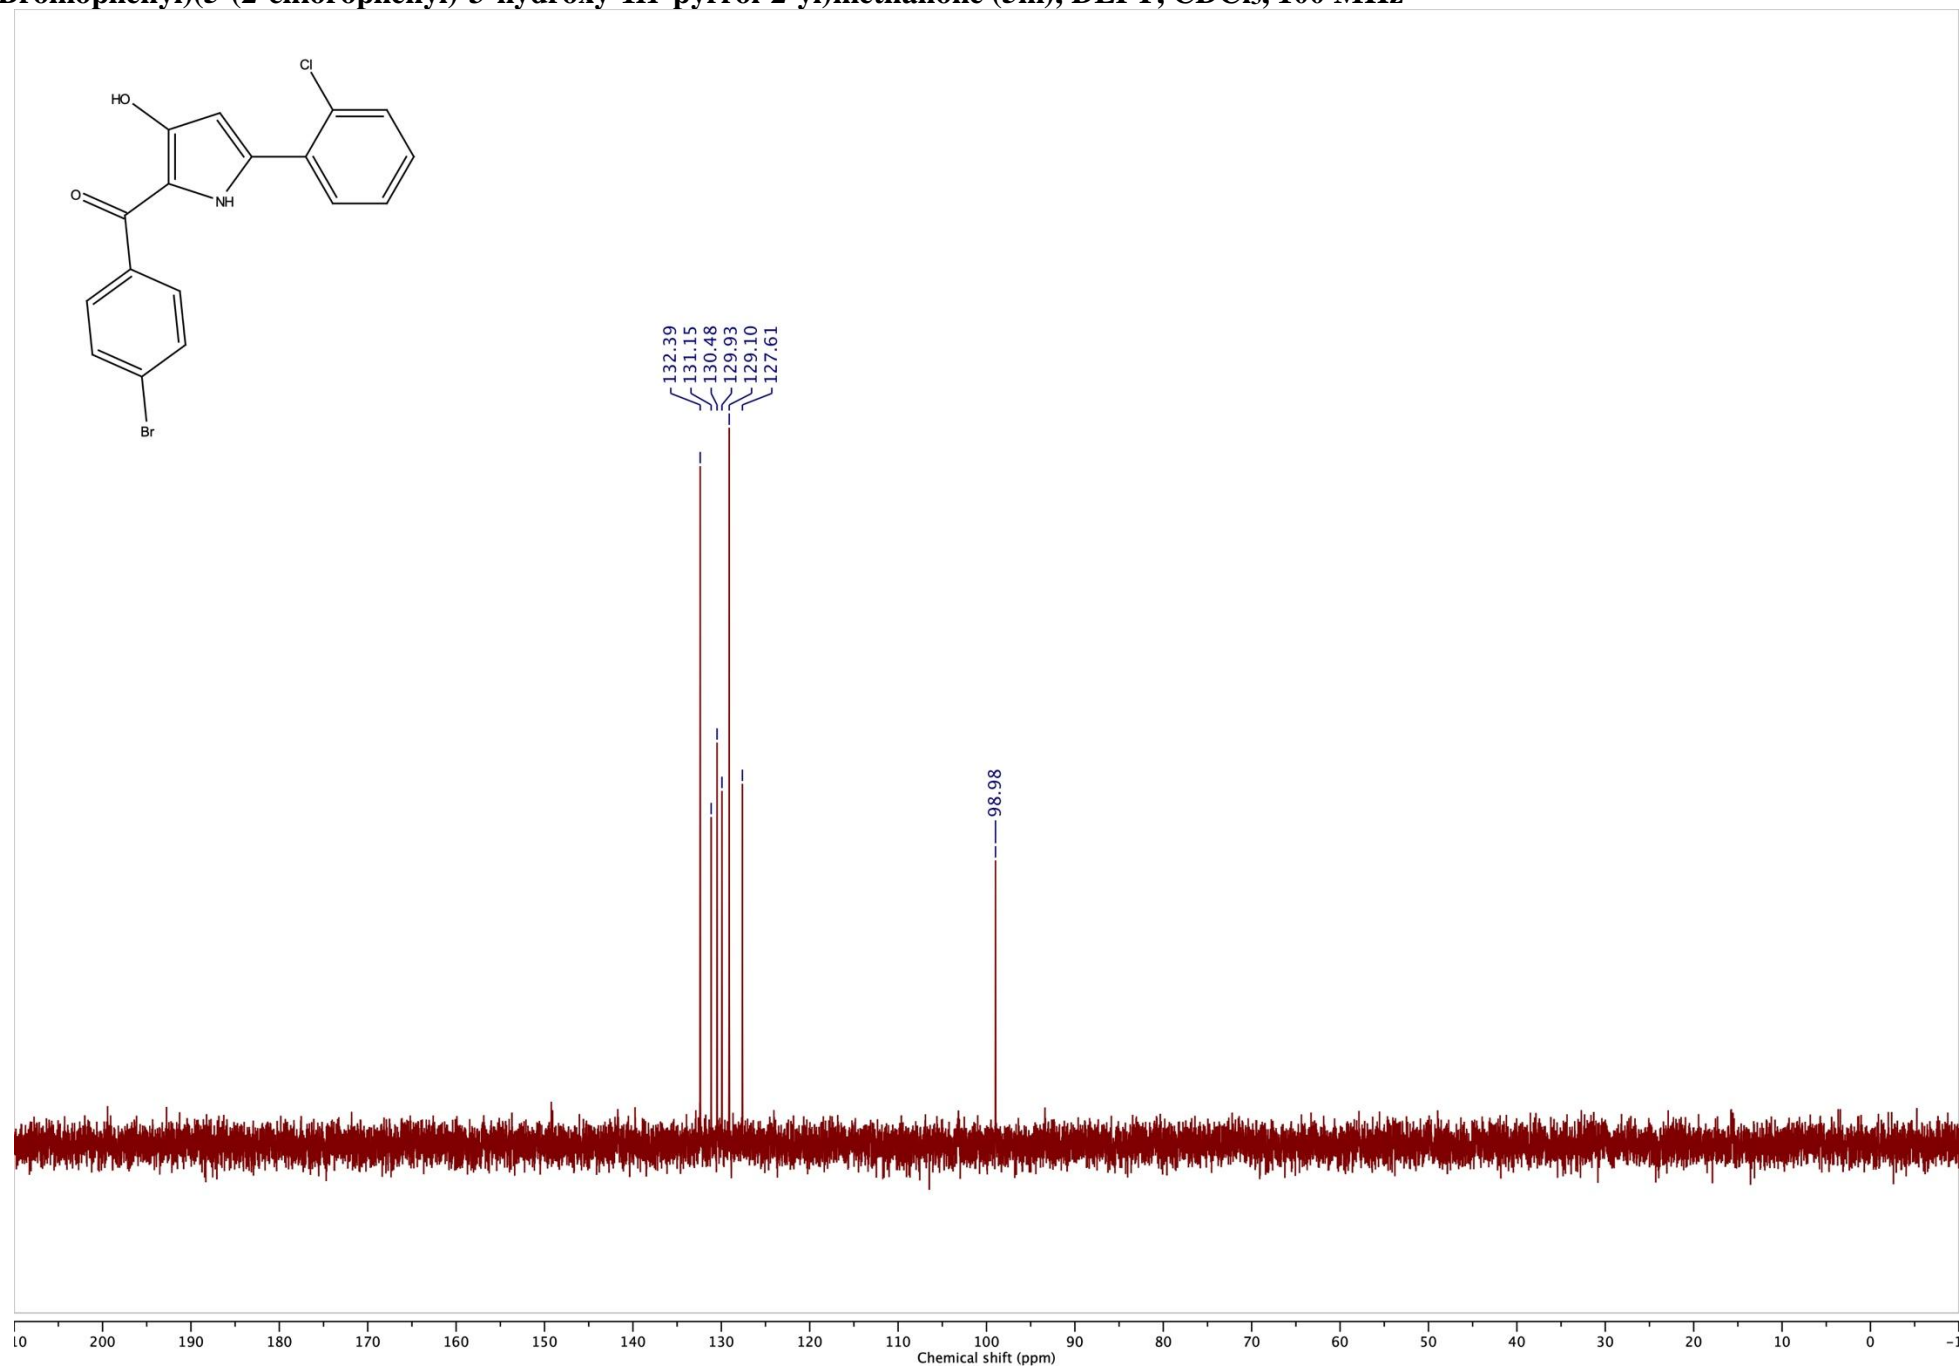

(2-Bromophenyl)(3-hydroxy-5-(*p*-tolyl)-1*H*-pyrrol-2-yl)methanone (5n), <sup>1</sup>H NMR, CDCl<sub>3</sub>, 400 MHz

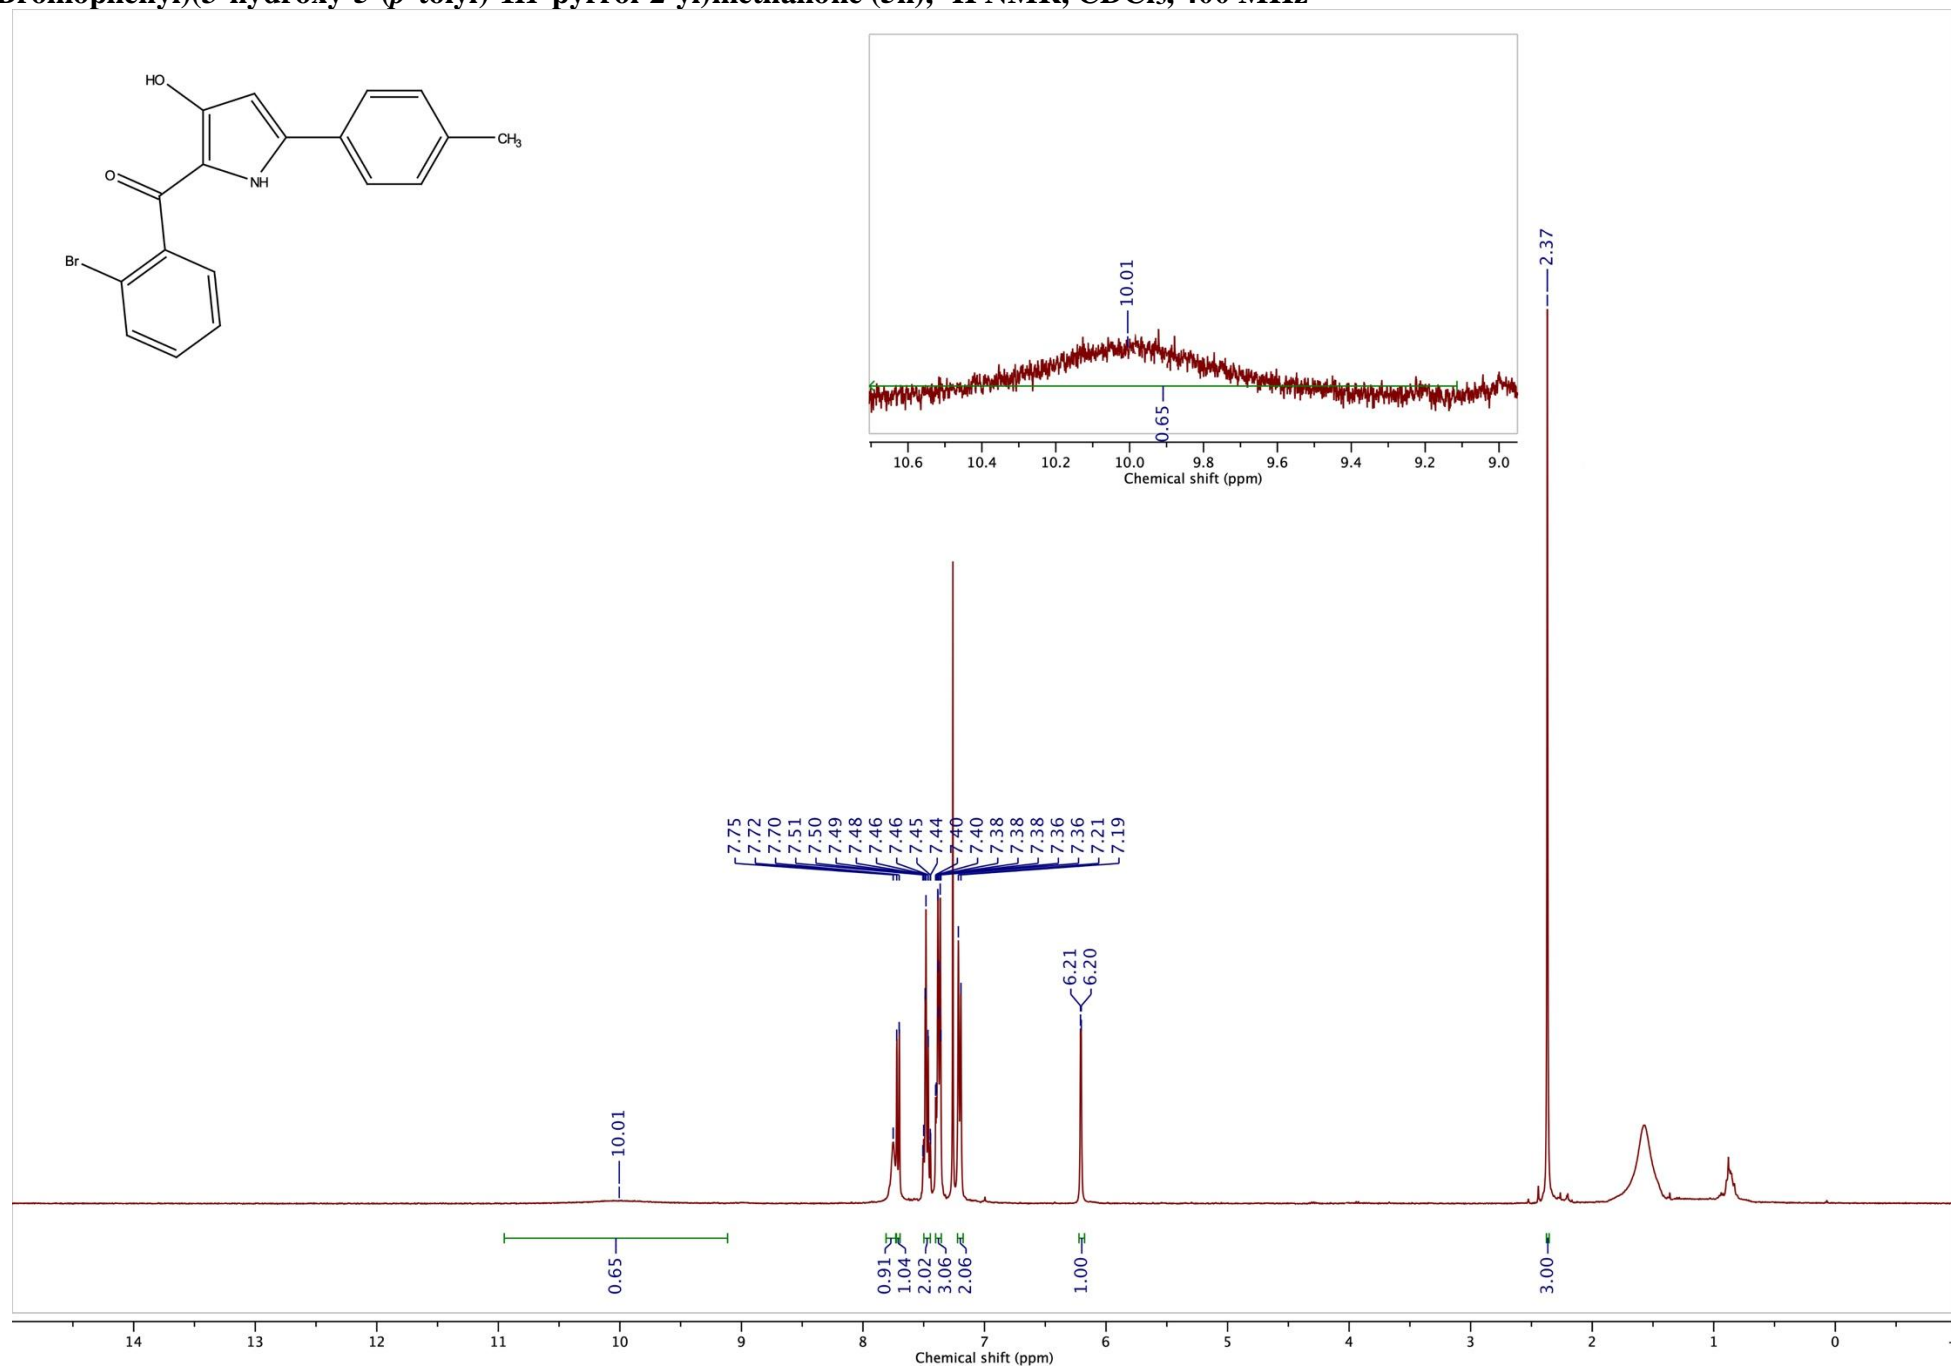

(2-Bromophenyl)(3-hydroxy-5-(*p*-tolyl)-1*H*-pyrrol-2-yl)methanone (5n),  $^{13}\text{C}\{^1\text{H}\}$  NMR,  $\text{CDCl}_3$ , 100 MHz

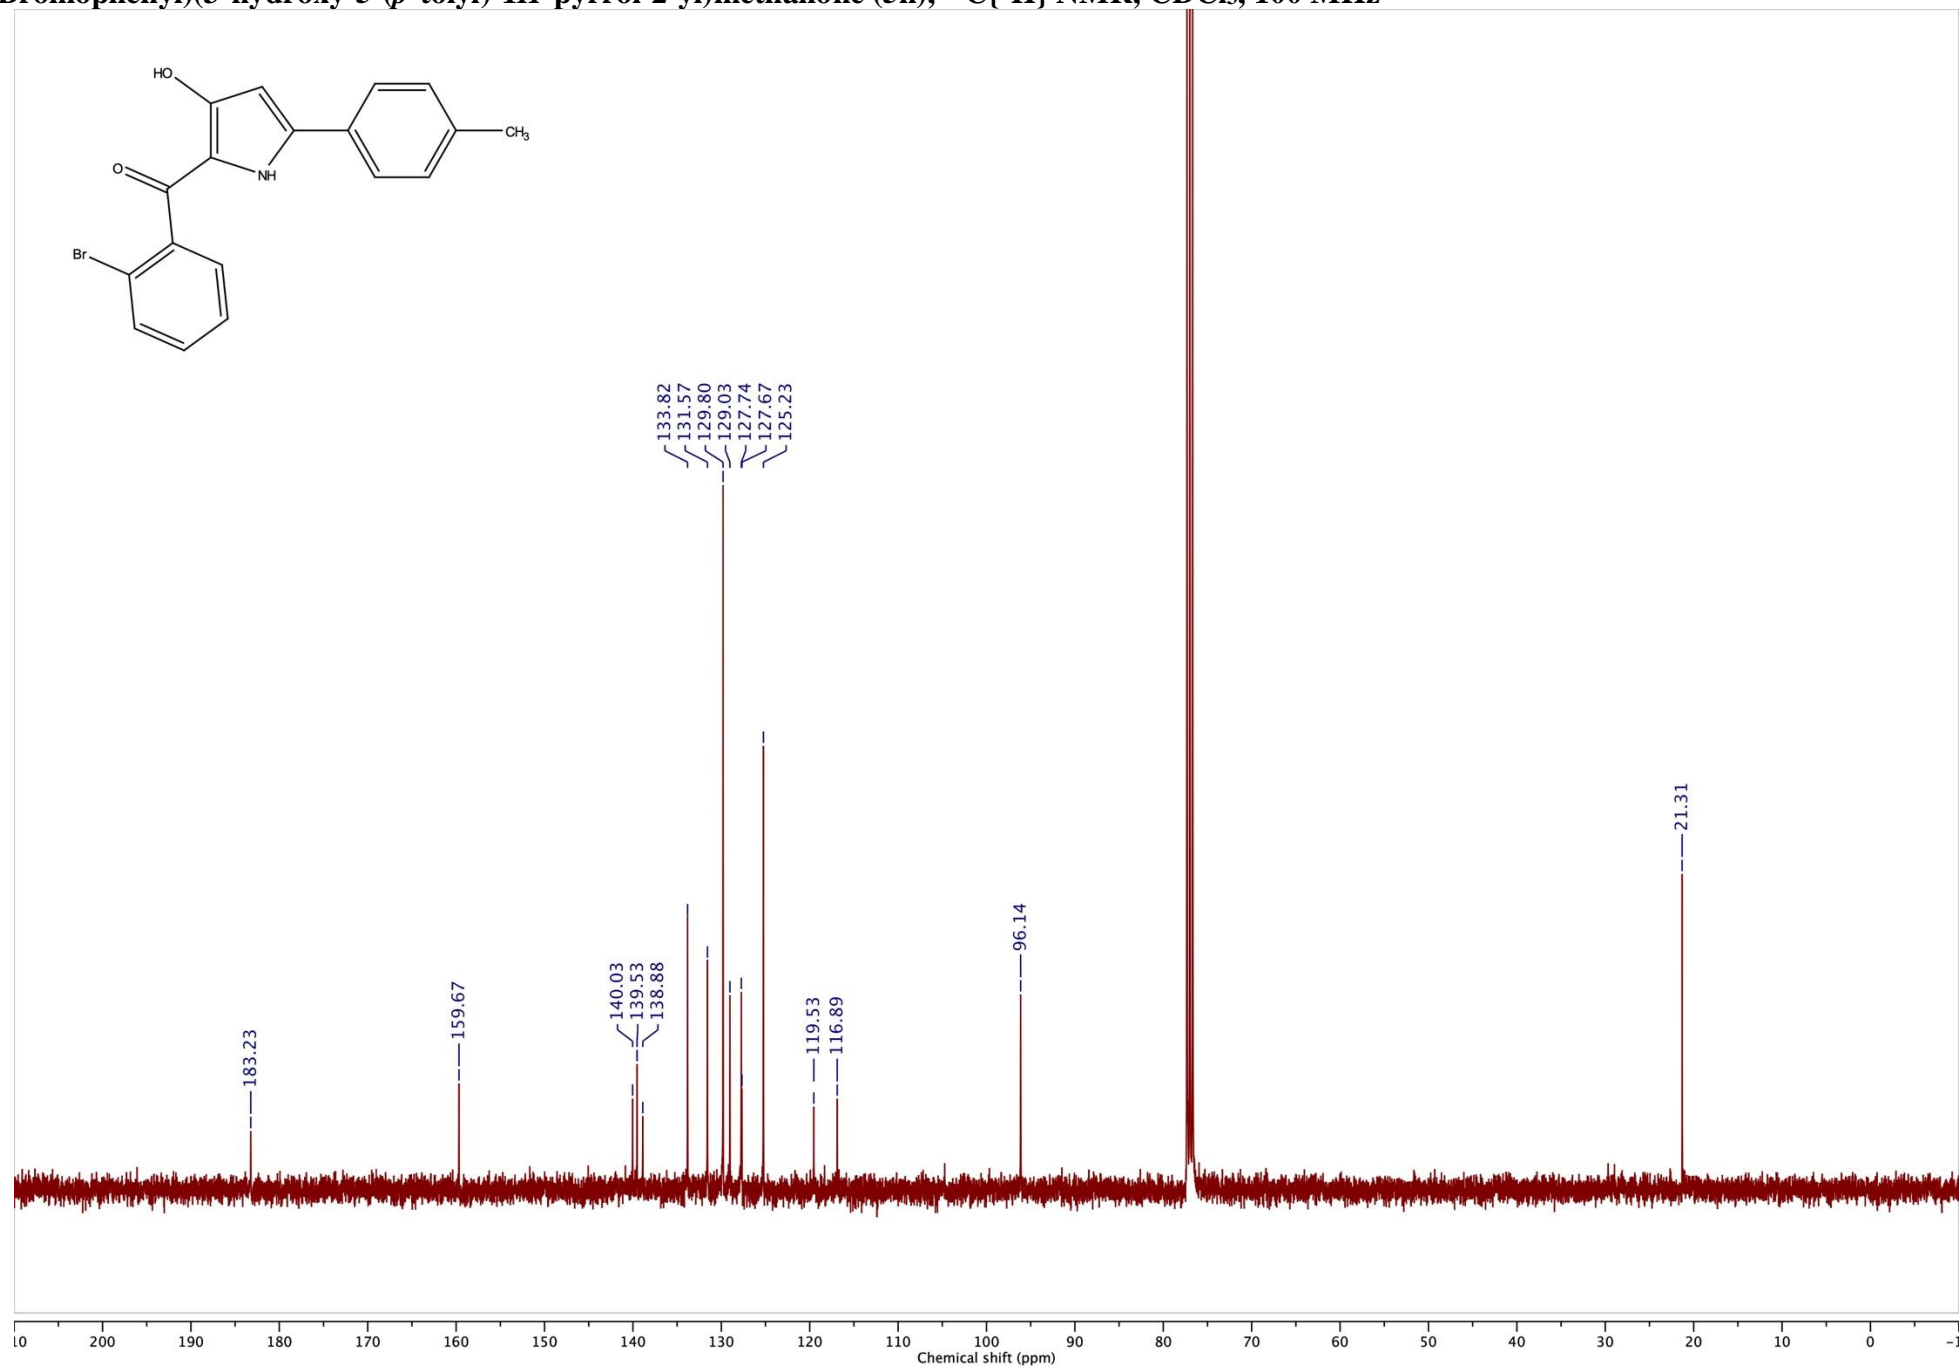

(2-Bromophenyl)(3-hydroxy-5-(*p*-tolyl)-1*H*-pyrrol-2-yl)methanone (5n), DEPT, CDCl<sub>3</sub>, 100 MHz

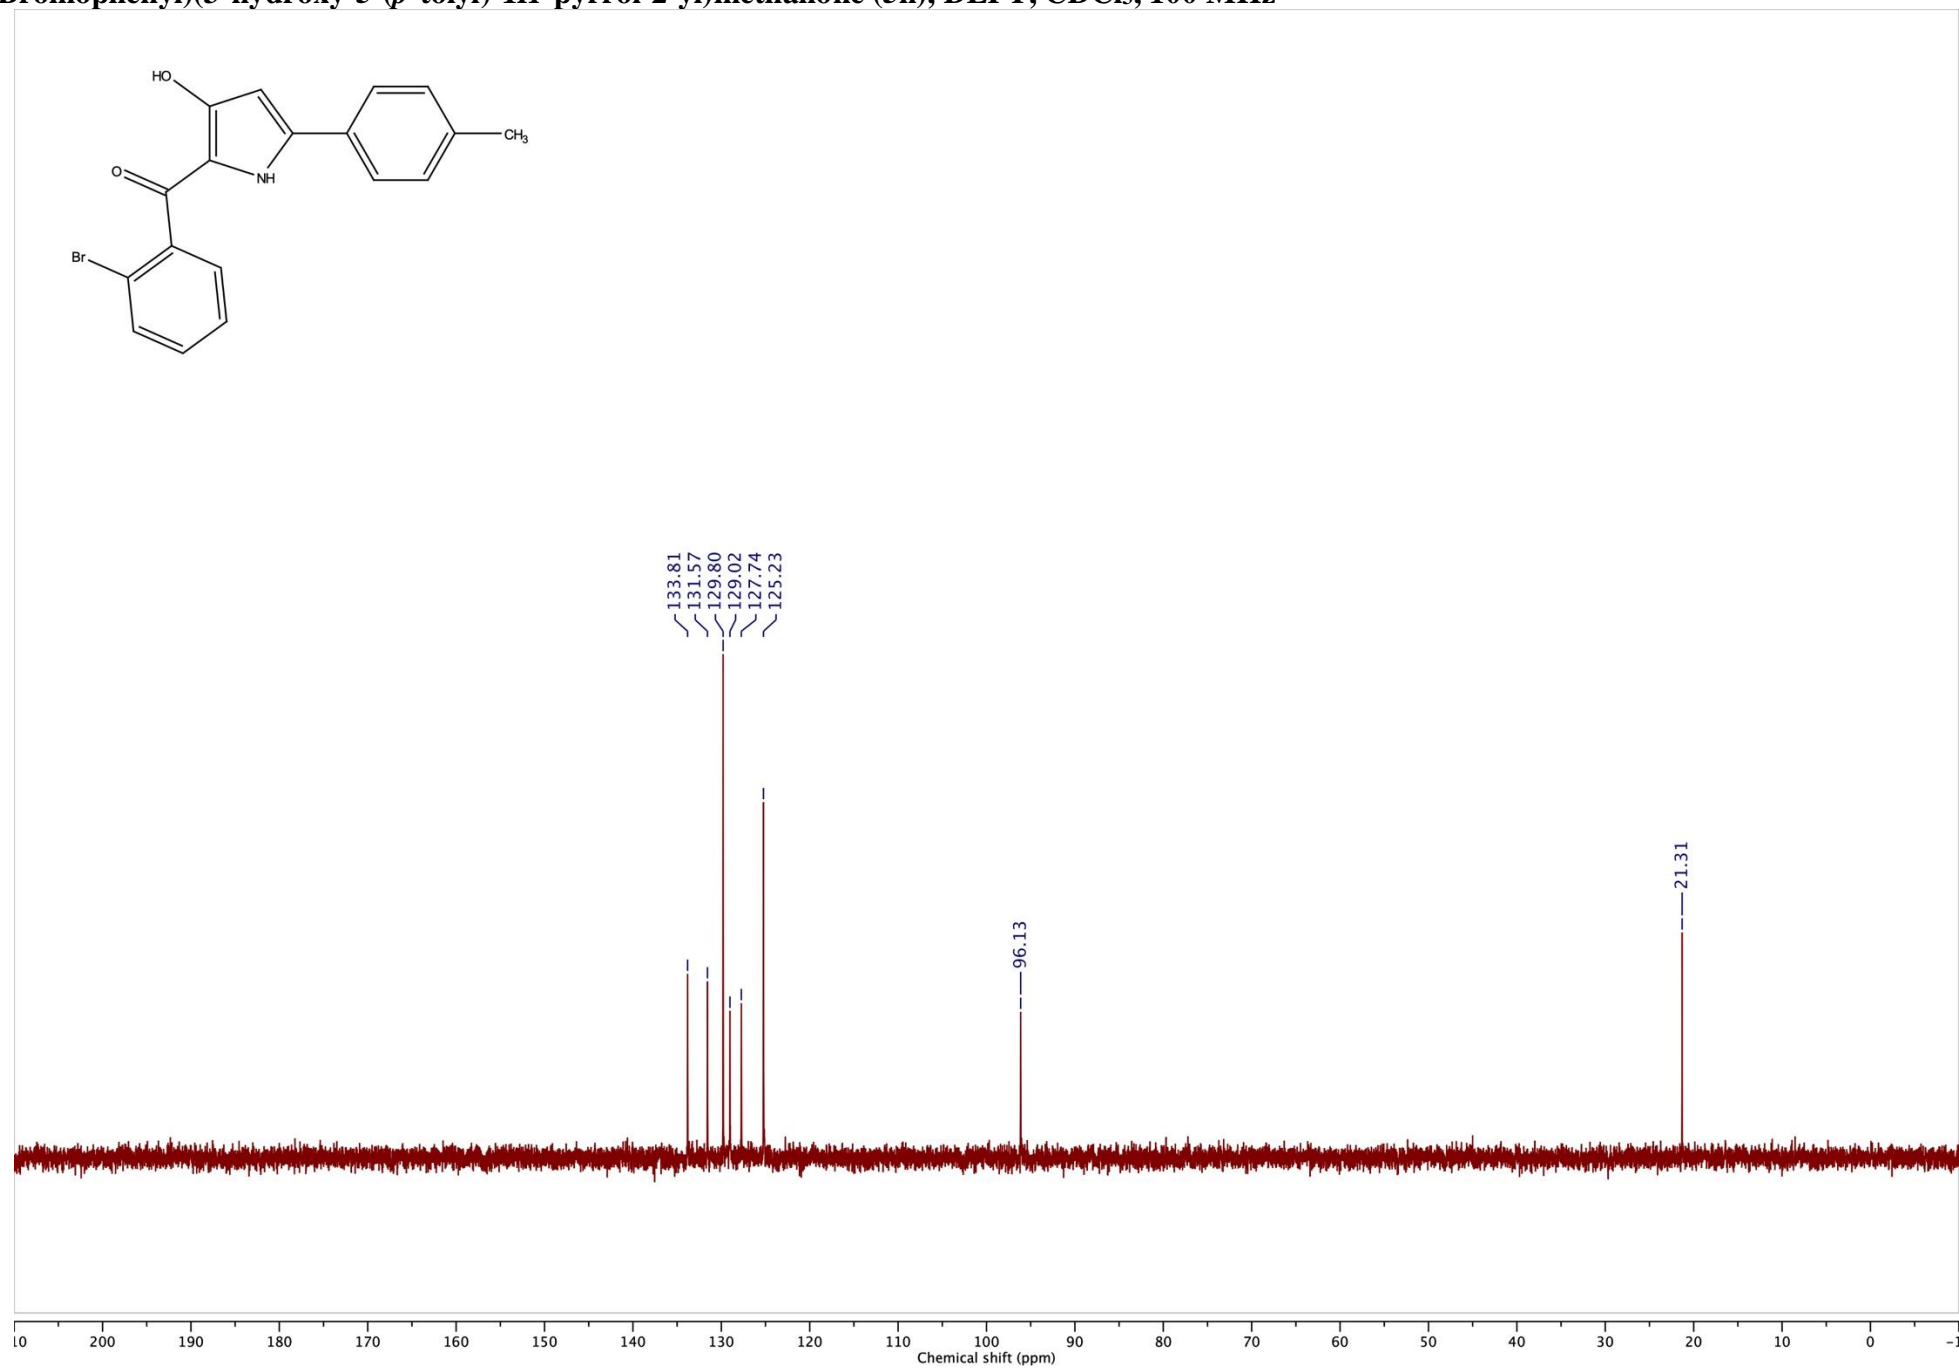

Adamantan-1-yl(5-(3,4-dimethoxyphenyl)-3-hydroxy-1H-pyrrol-2-yl)methanone (5o), <sup>1</sup>H NMR, CDCl<sub>3</sub>, 400 MHz

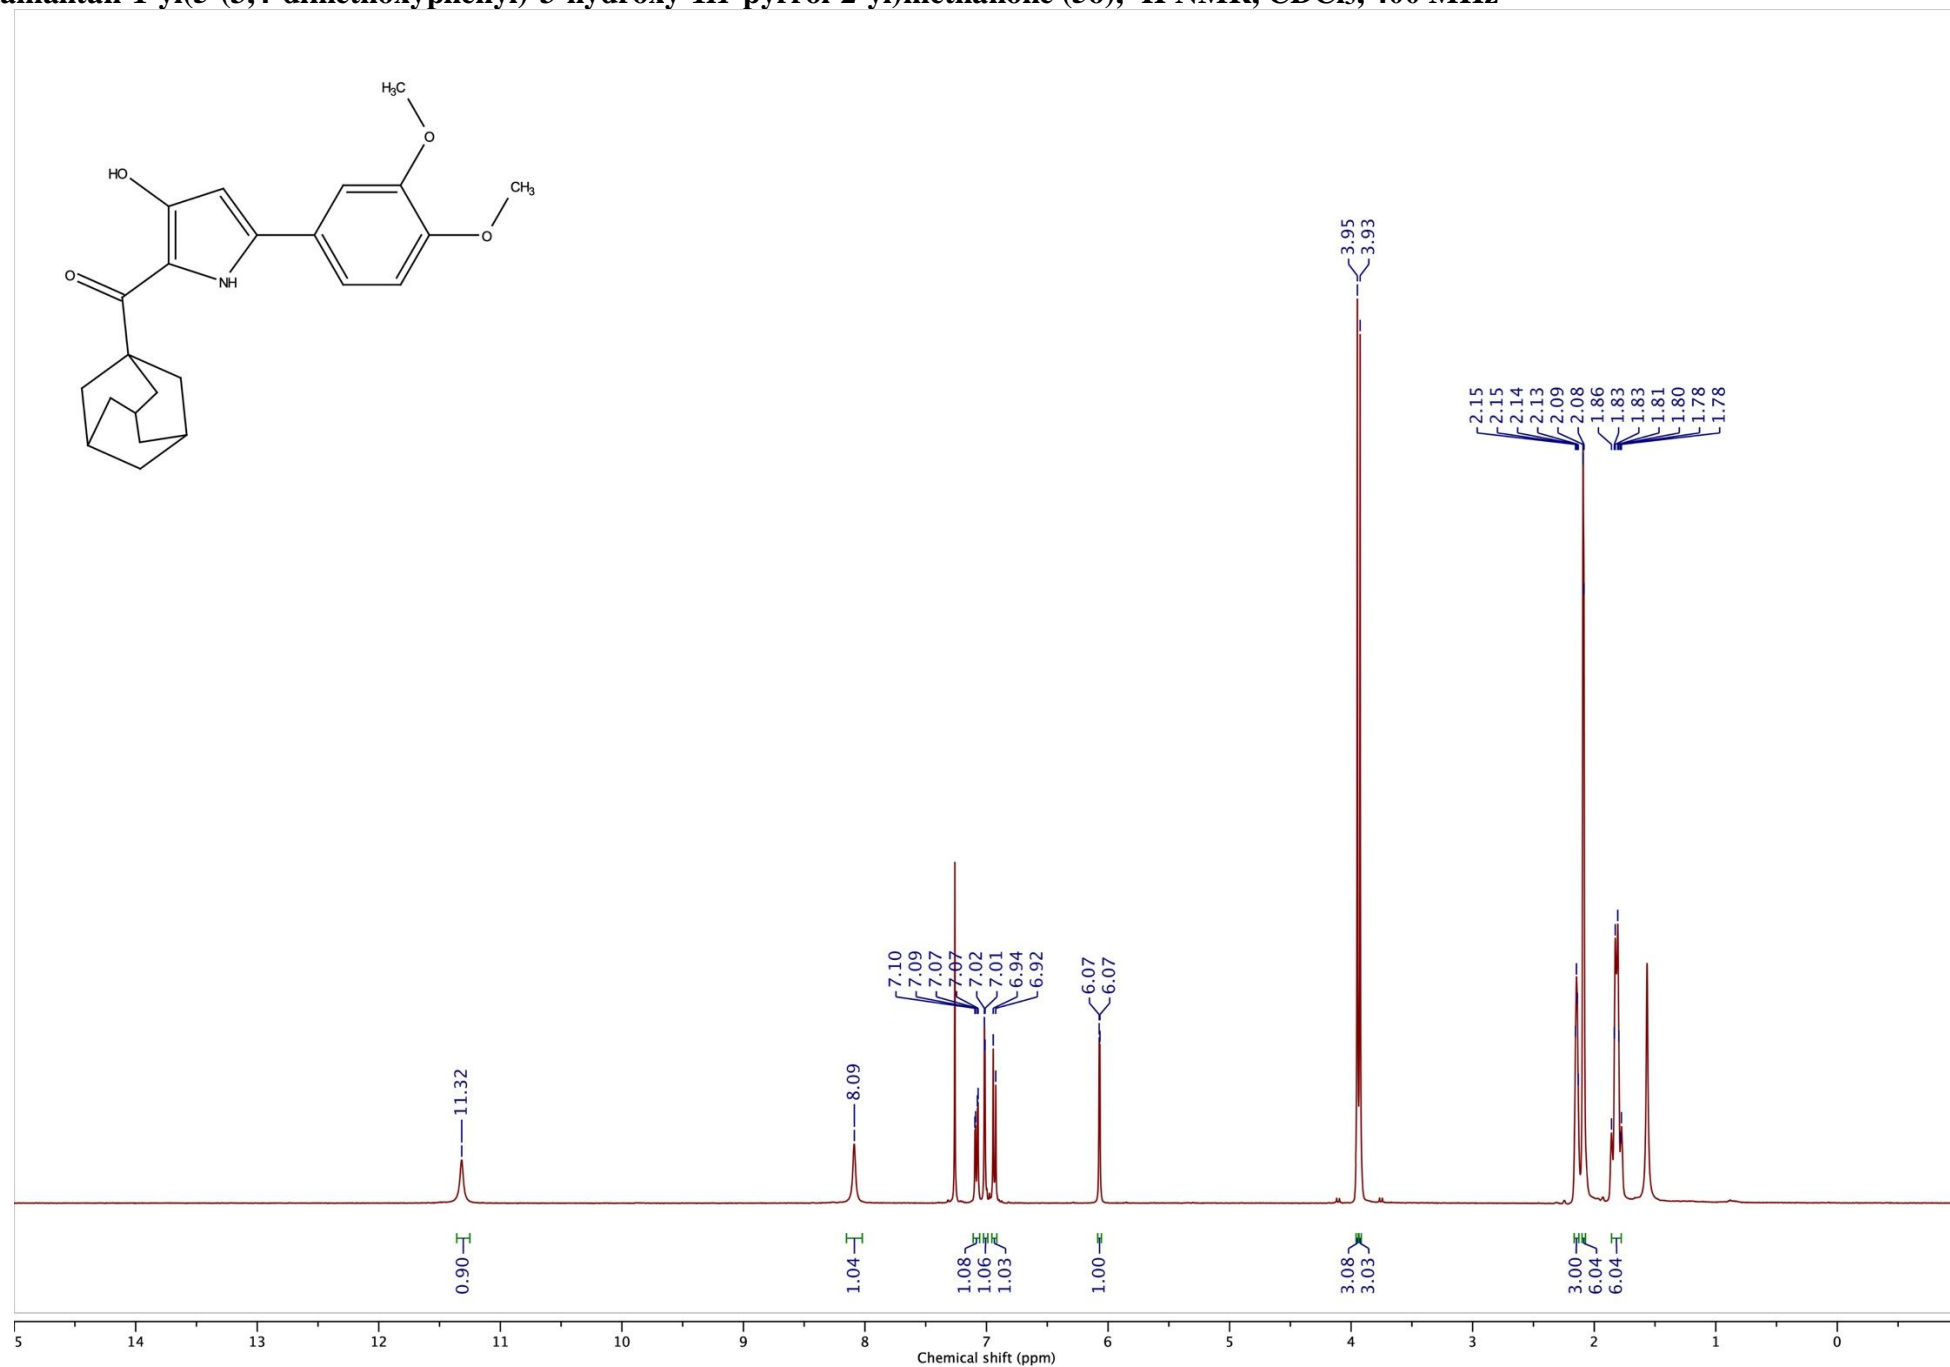

Adamantan-1-yl(5-(3,4-dimethoxyphenyl)-3-hydroxy-1H-pyrrol-2-yl)methanone (5o),  $^{13}\text{C}\{^1\text{H}\}$  NMR,  $\text{CDCl}_3$ , 100 MHz

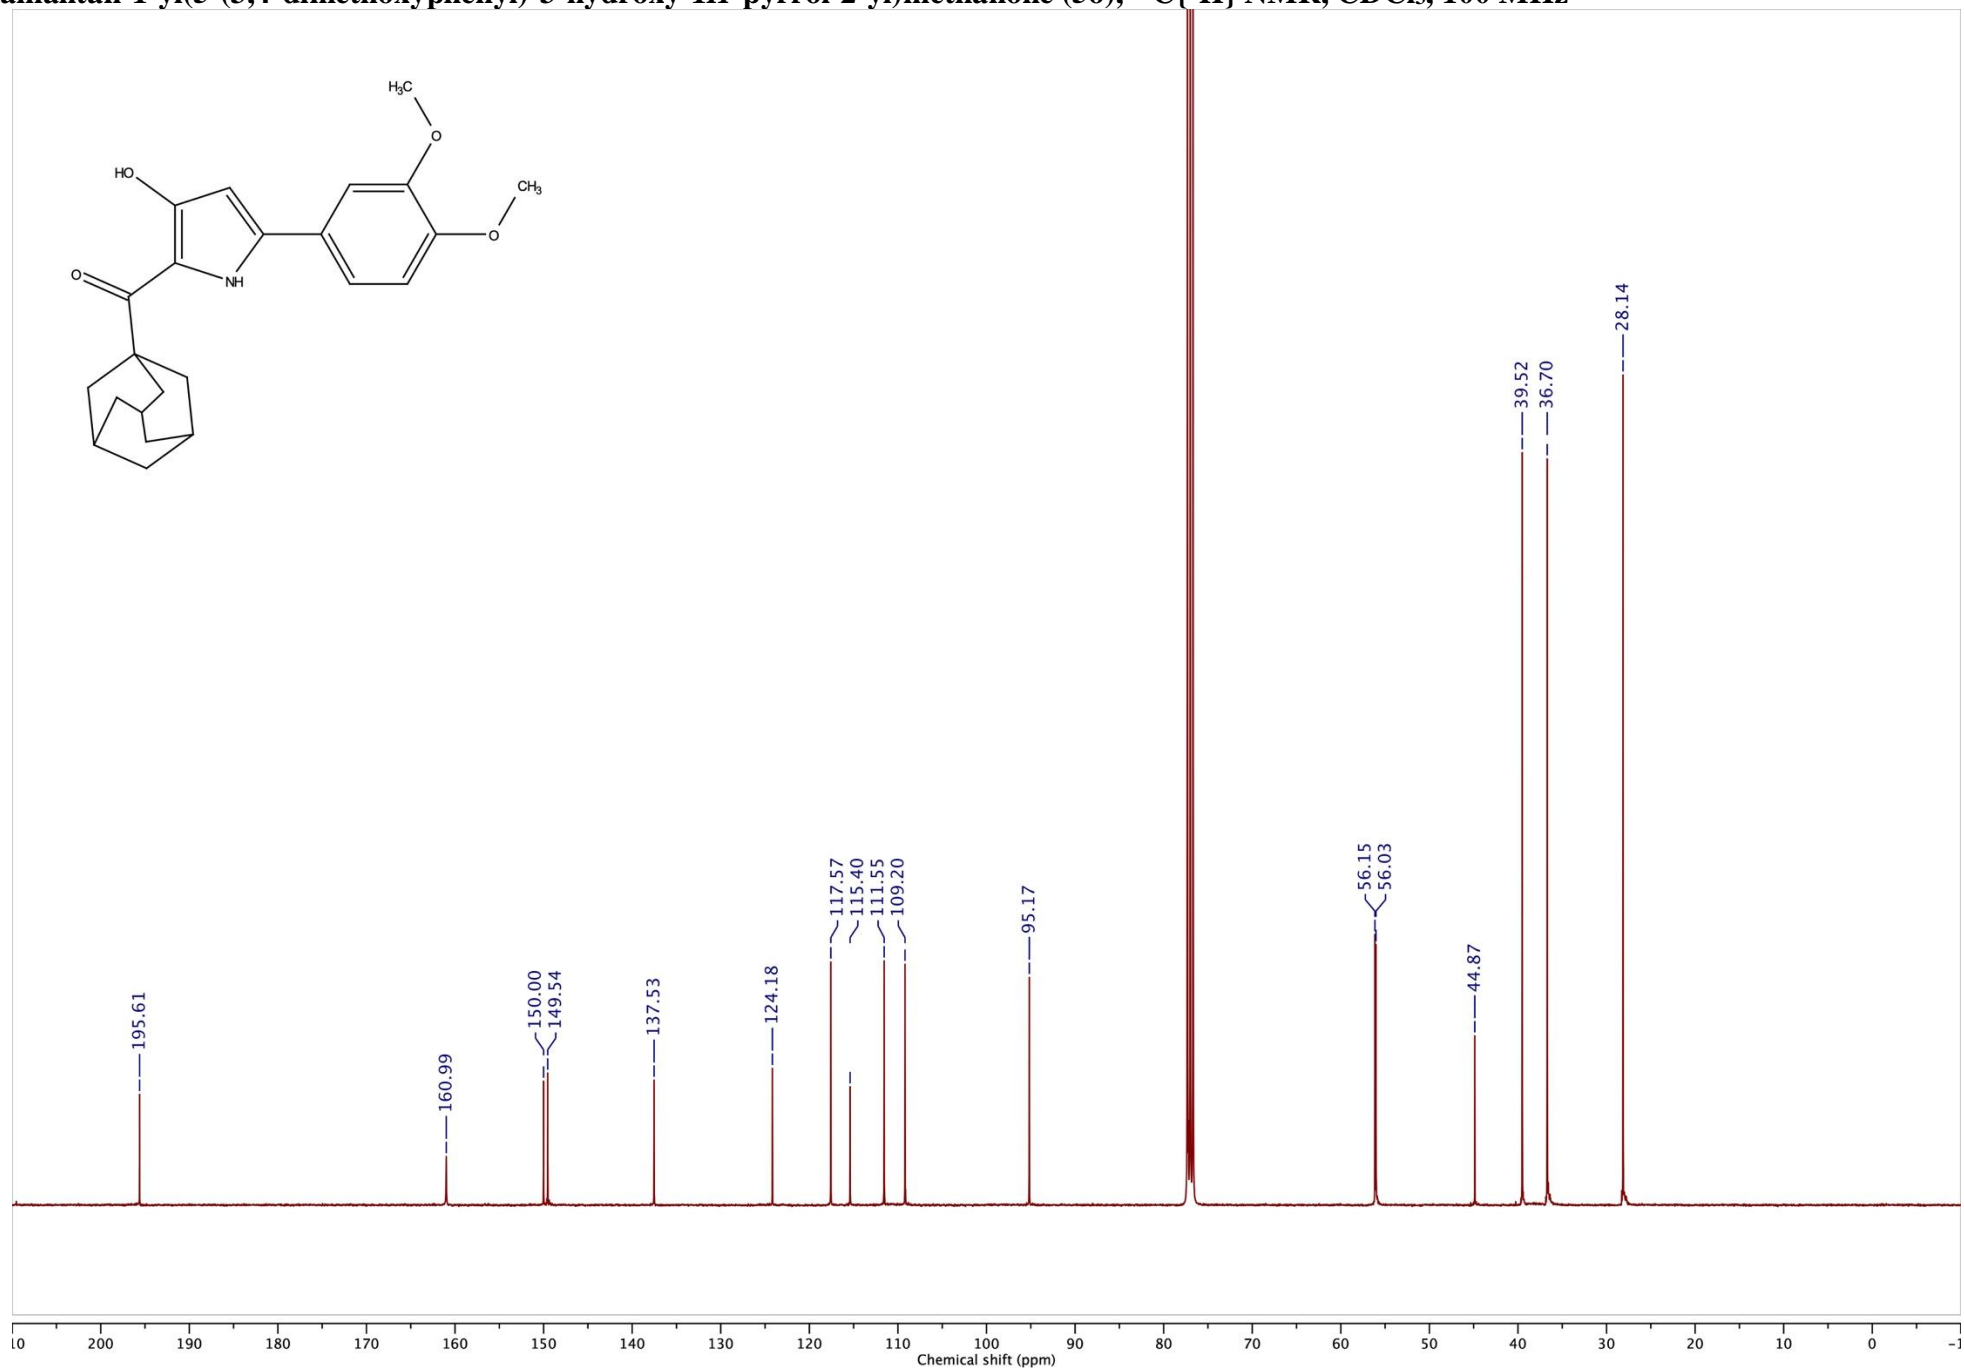

Adamantan-1-yl(5-(3,4-dimethoxyphenyl)-3-hydroxy-1H-pyrrol-2-yl)methanone (5o), DEPT, CDCl<sub>3</sub>, 100 MHz

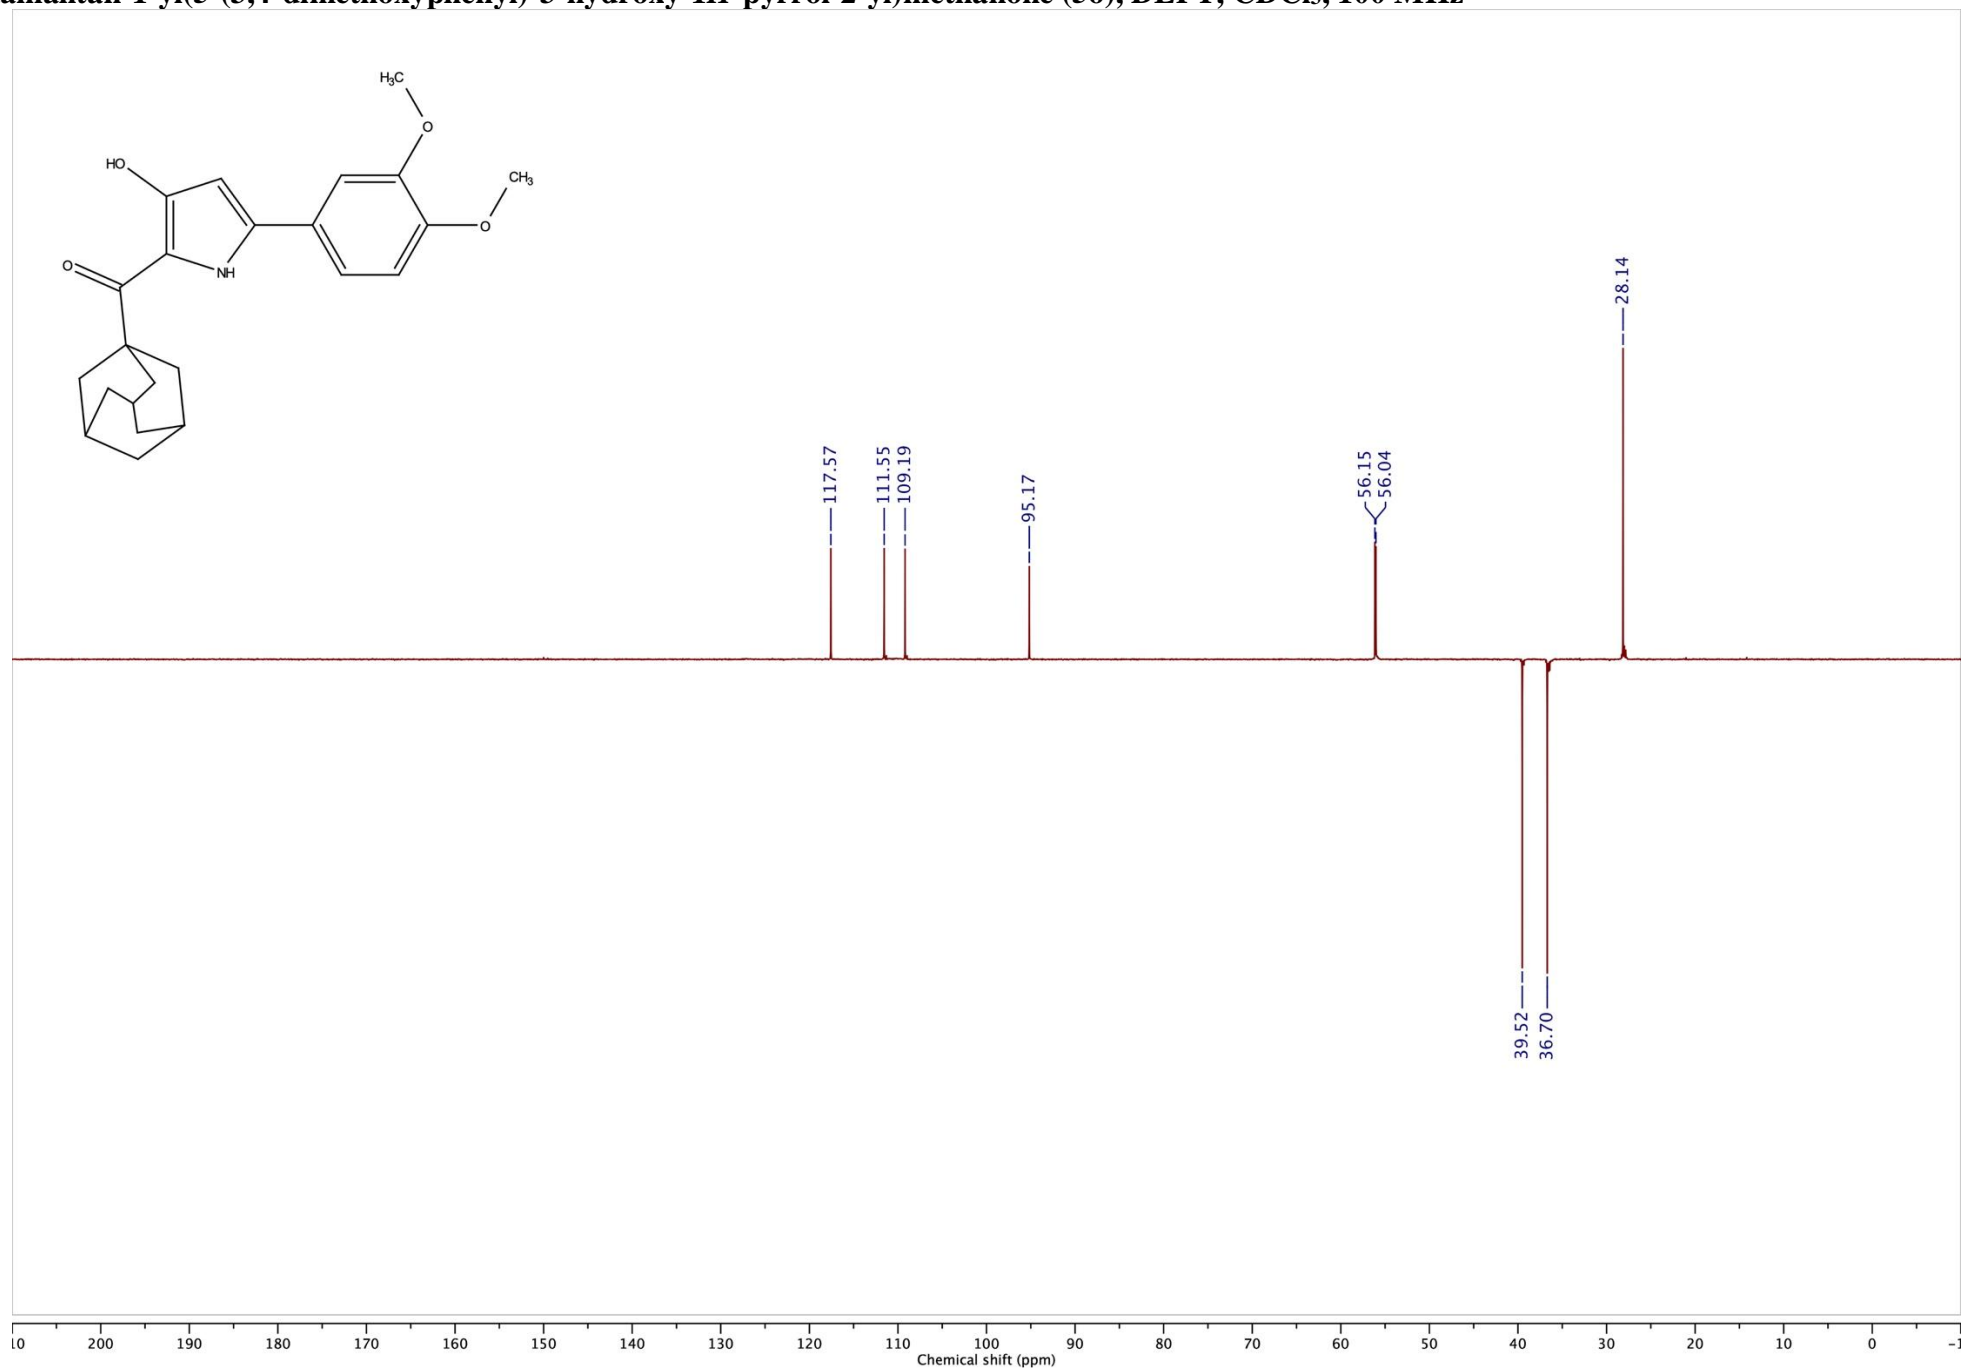

**(3-Hydroxy-5-phenyl-1H-pyrrol-2-yl)(thiophen-2-yl)methanone (5p), <sup>1</sup>H NMR, CDCl<sub>3</sub>, 400 MHz**

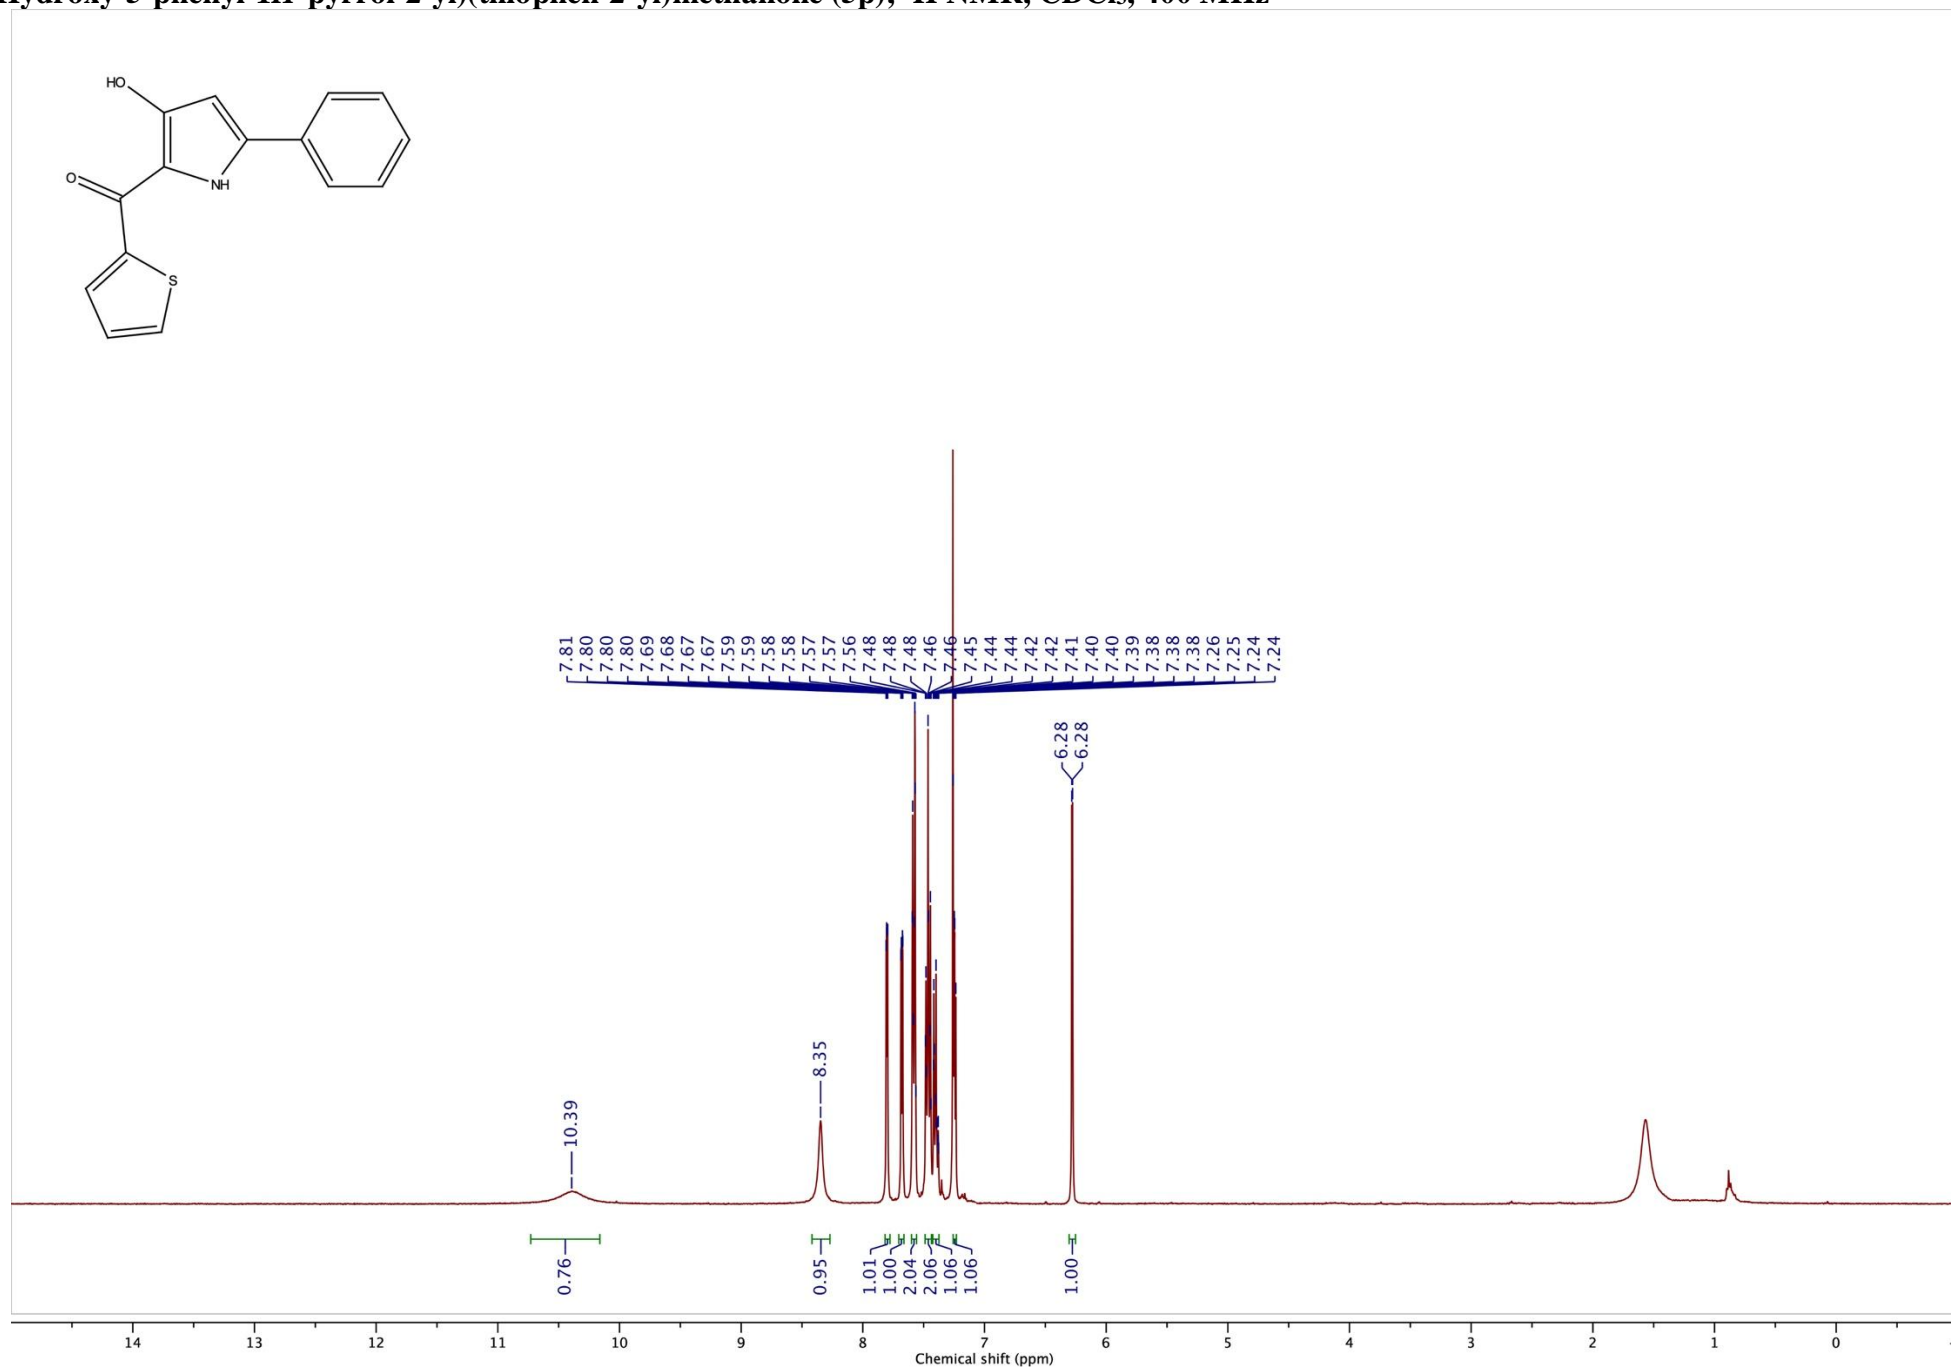

(3-Hydroxy-5-phenyl-1H-pyrrol-2-yl)(thiophen-2-yl)methanone (5p),  $^{13}\text{C}\{^1\text{H}\}$  NMR,  $\text{CDCl}_3$ , 100 MHz

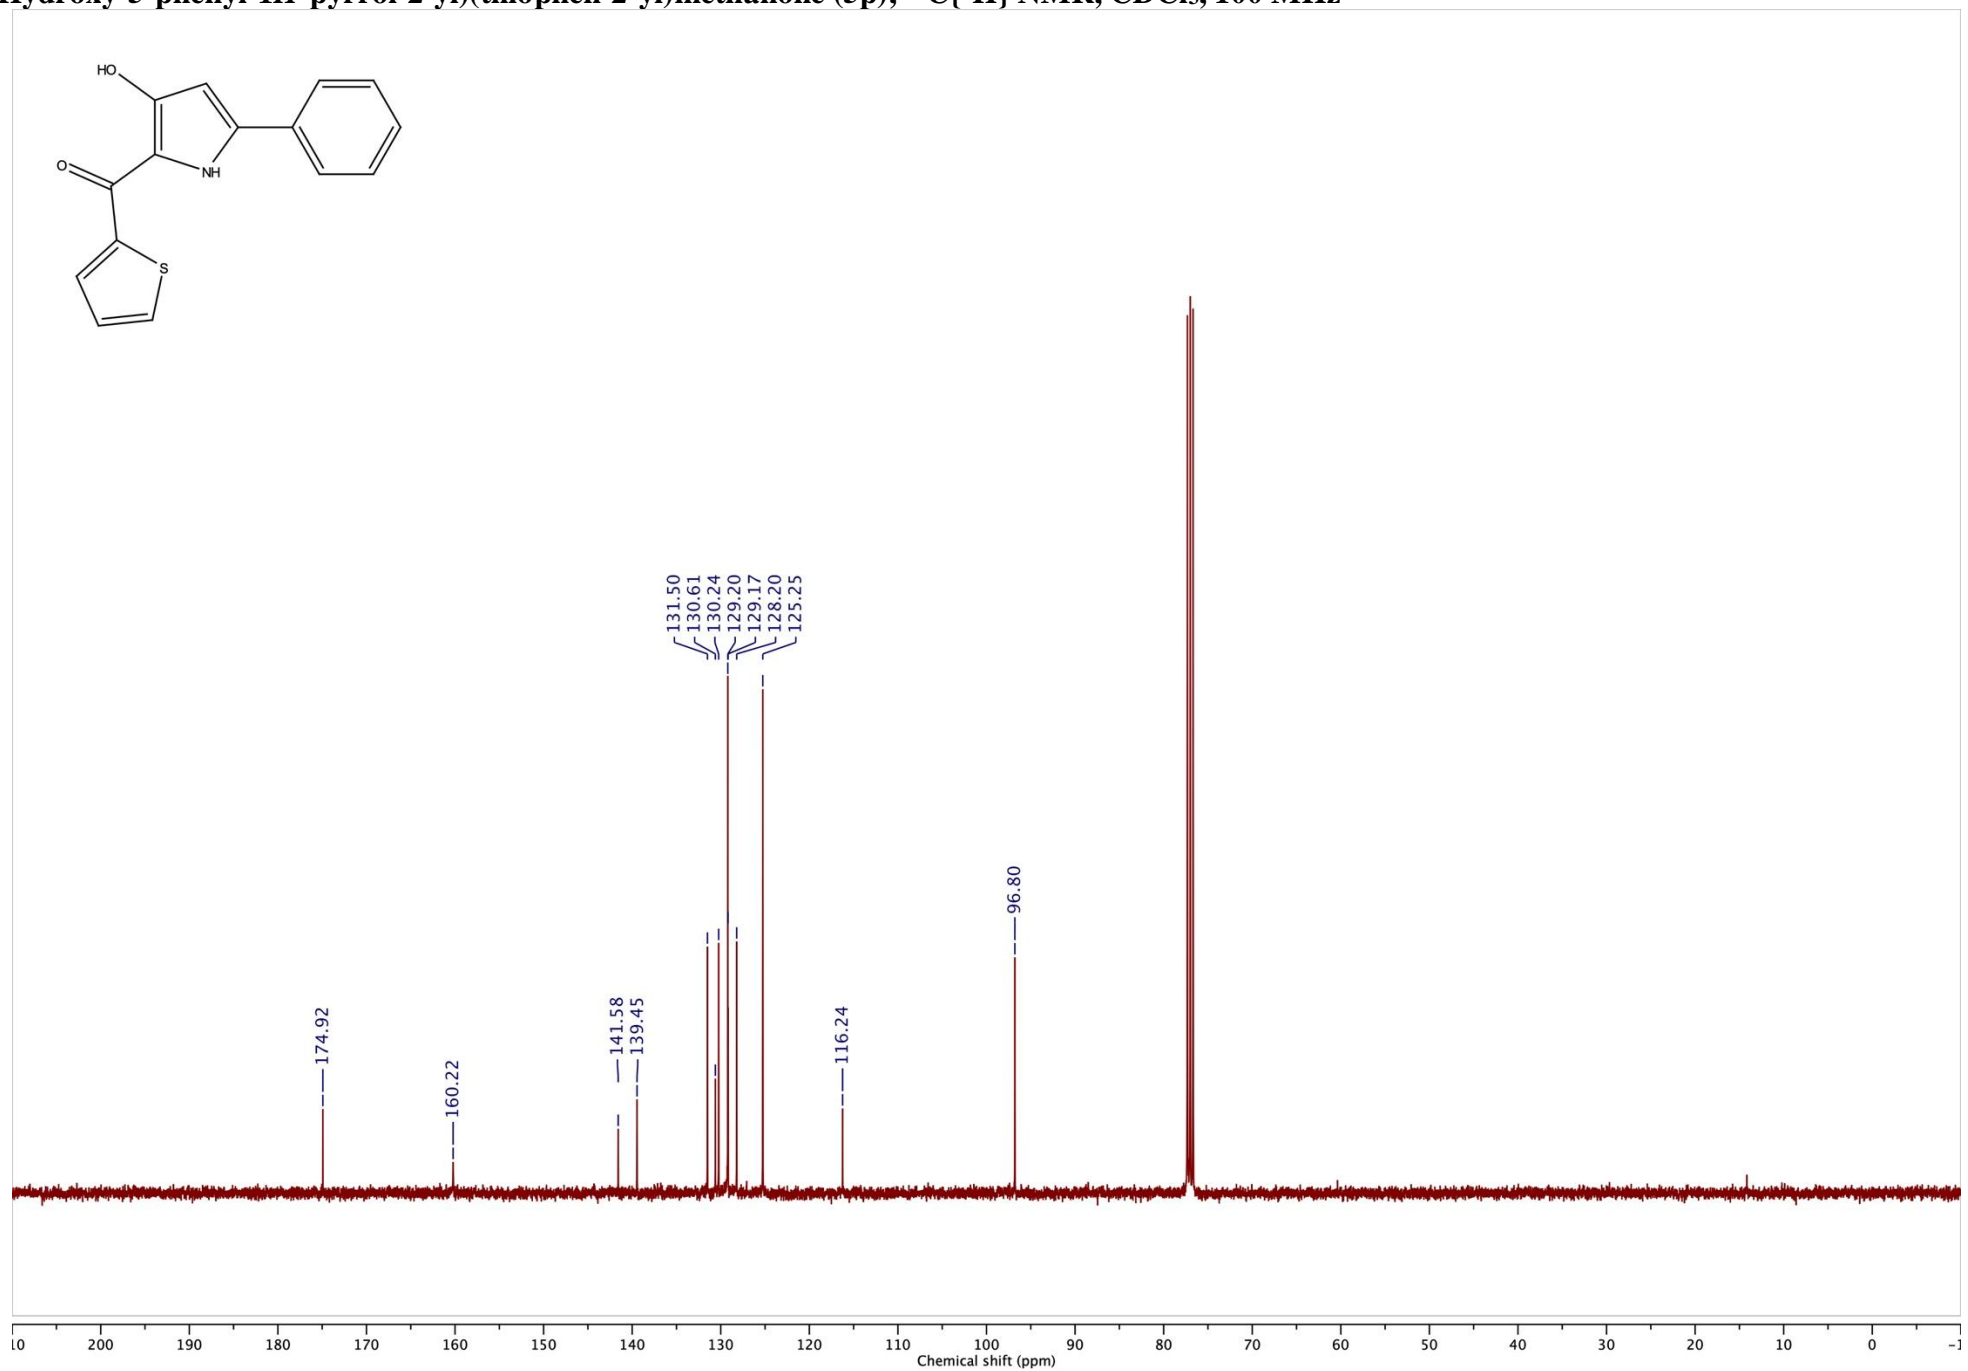

**(3-Hydroxy-5-phenyl-1H-pyrrol-2-yl)(thiophen-2-yl)methanone (5p), DEPT, CDCl<sub>3</sub>, 100 MHz**

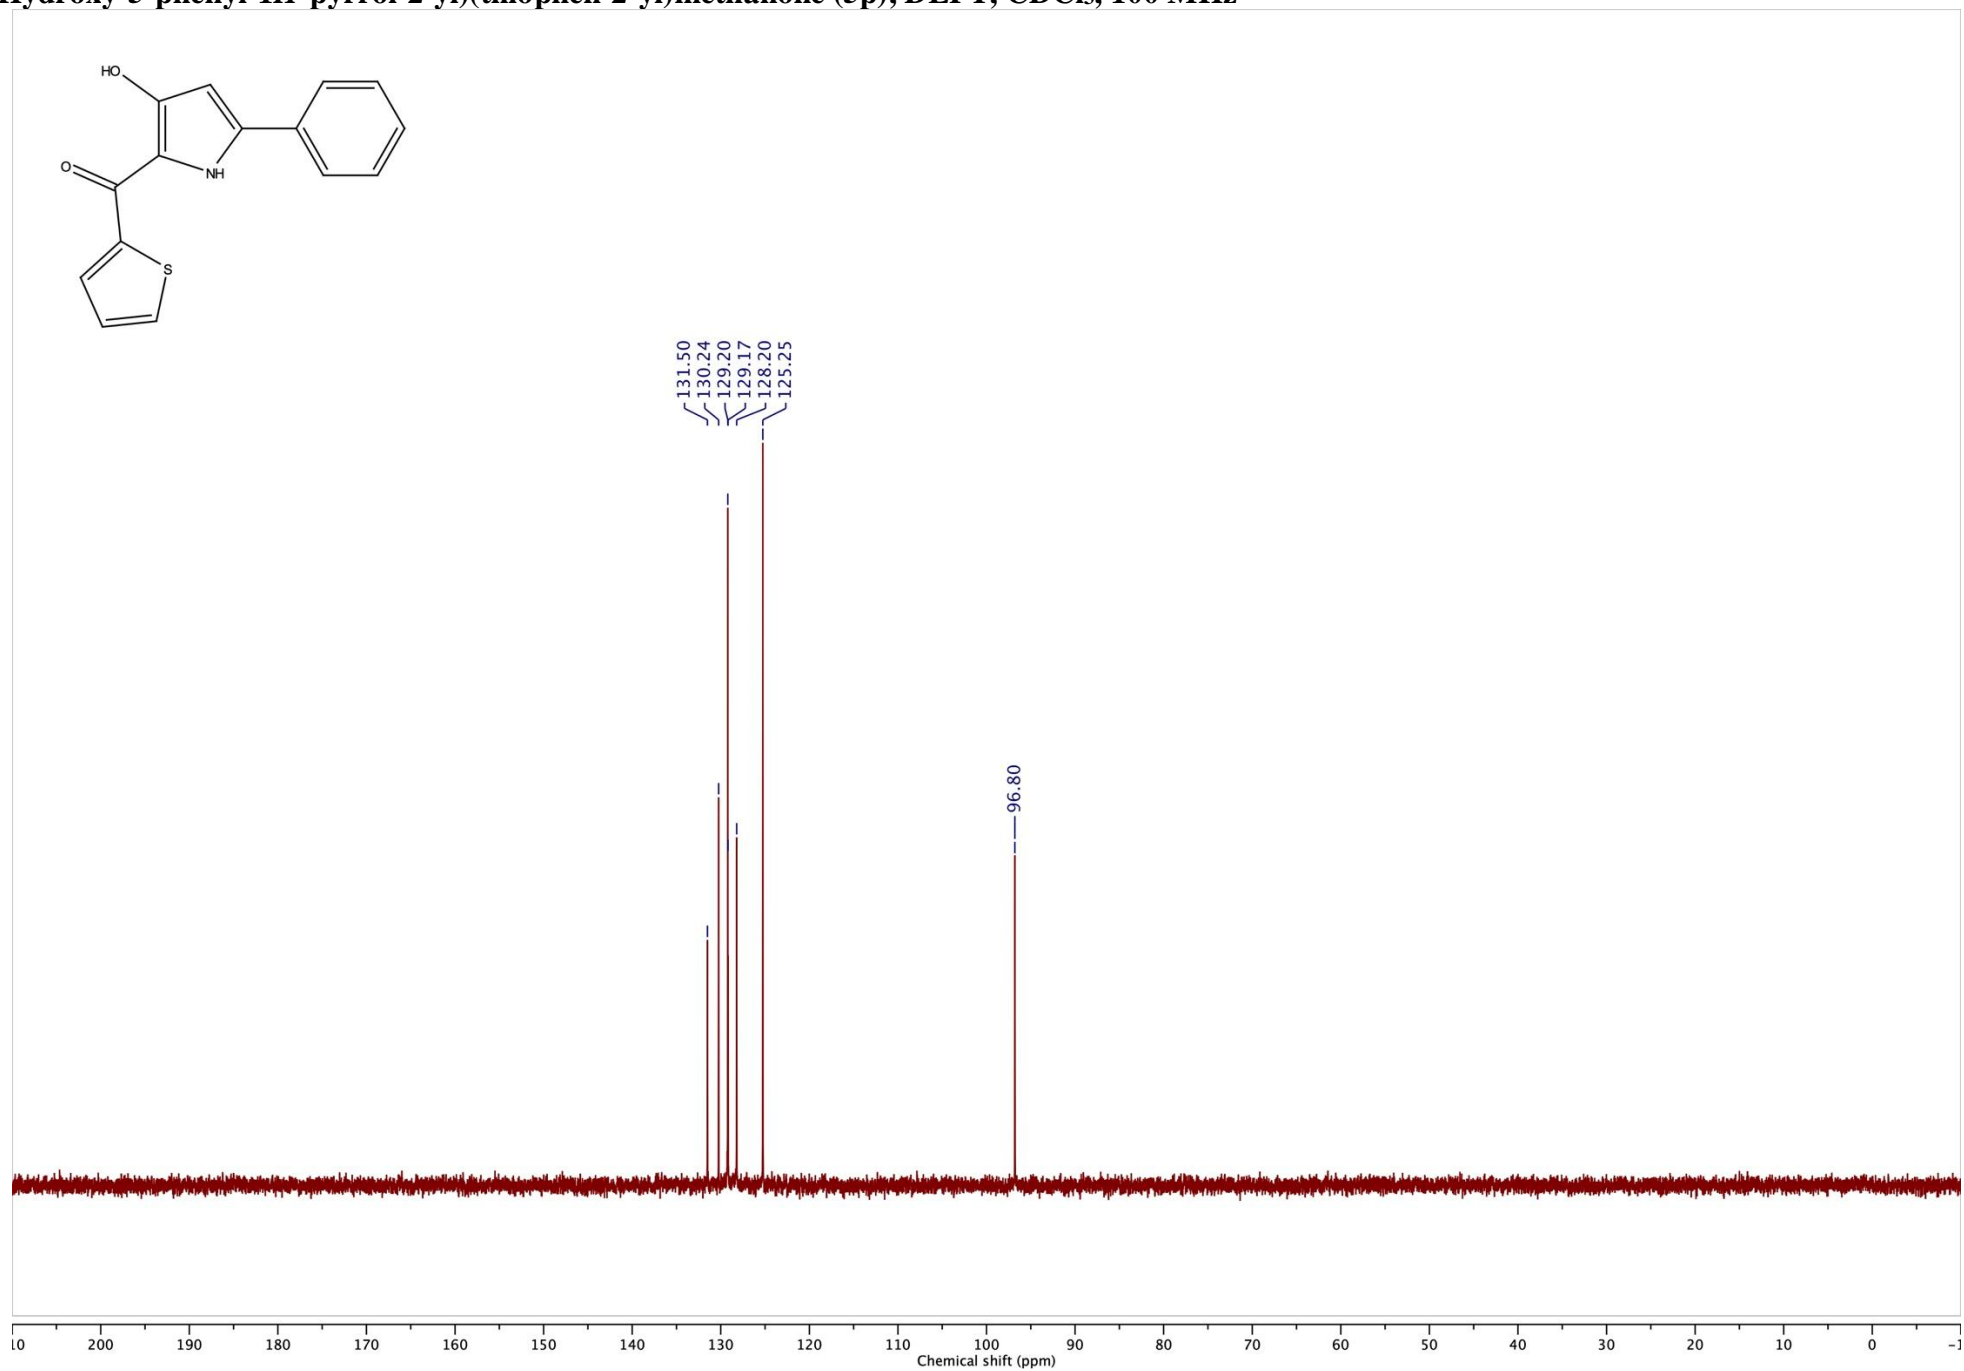

Ethyl 2-((2-benzoyl-5-(4-fluorophenyl)-1H-pyrrol-3-yl)oxy)acetate (6a), <sup>1</sup>H NMR, DMSO-d<sub>6</sub>, 400 MHz

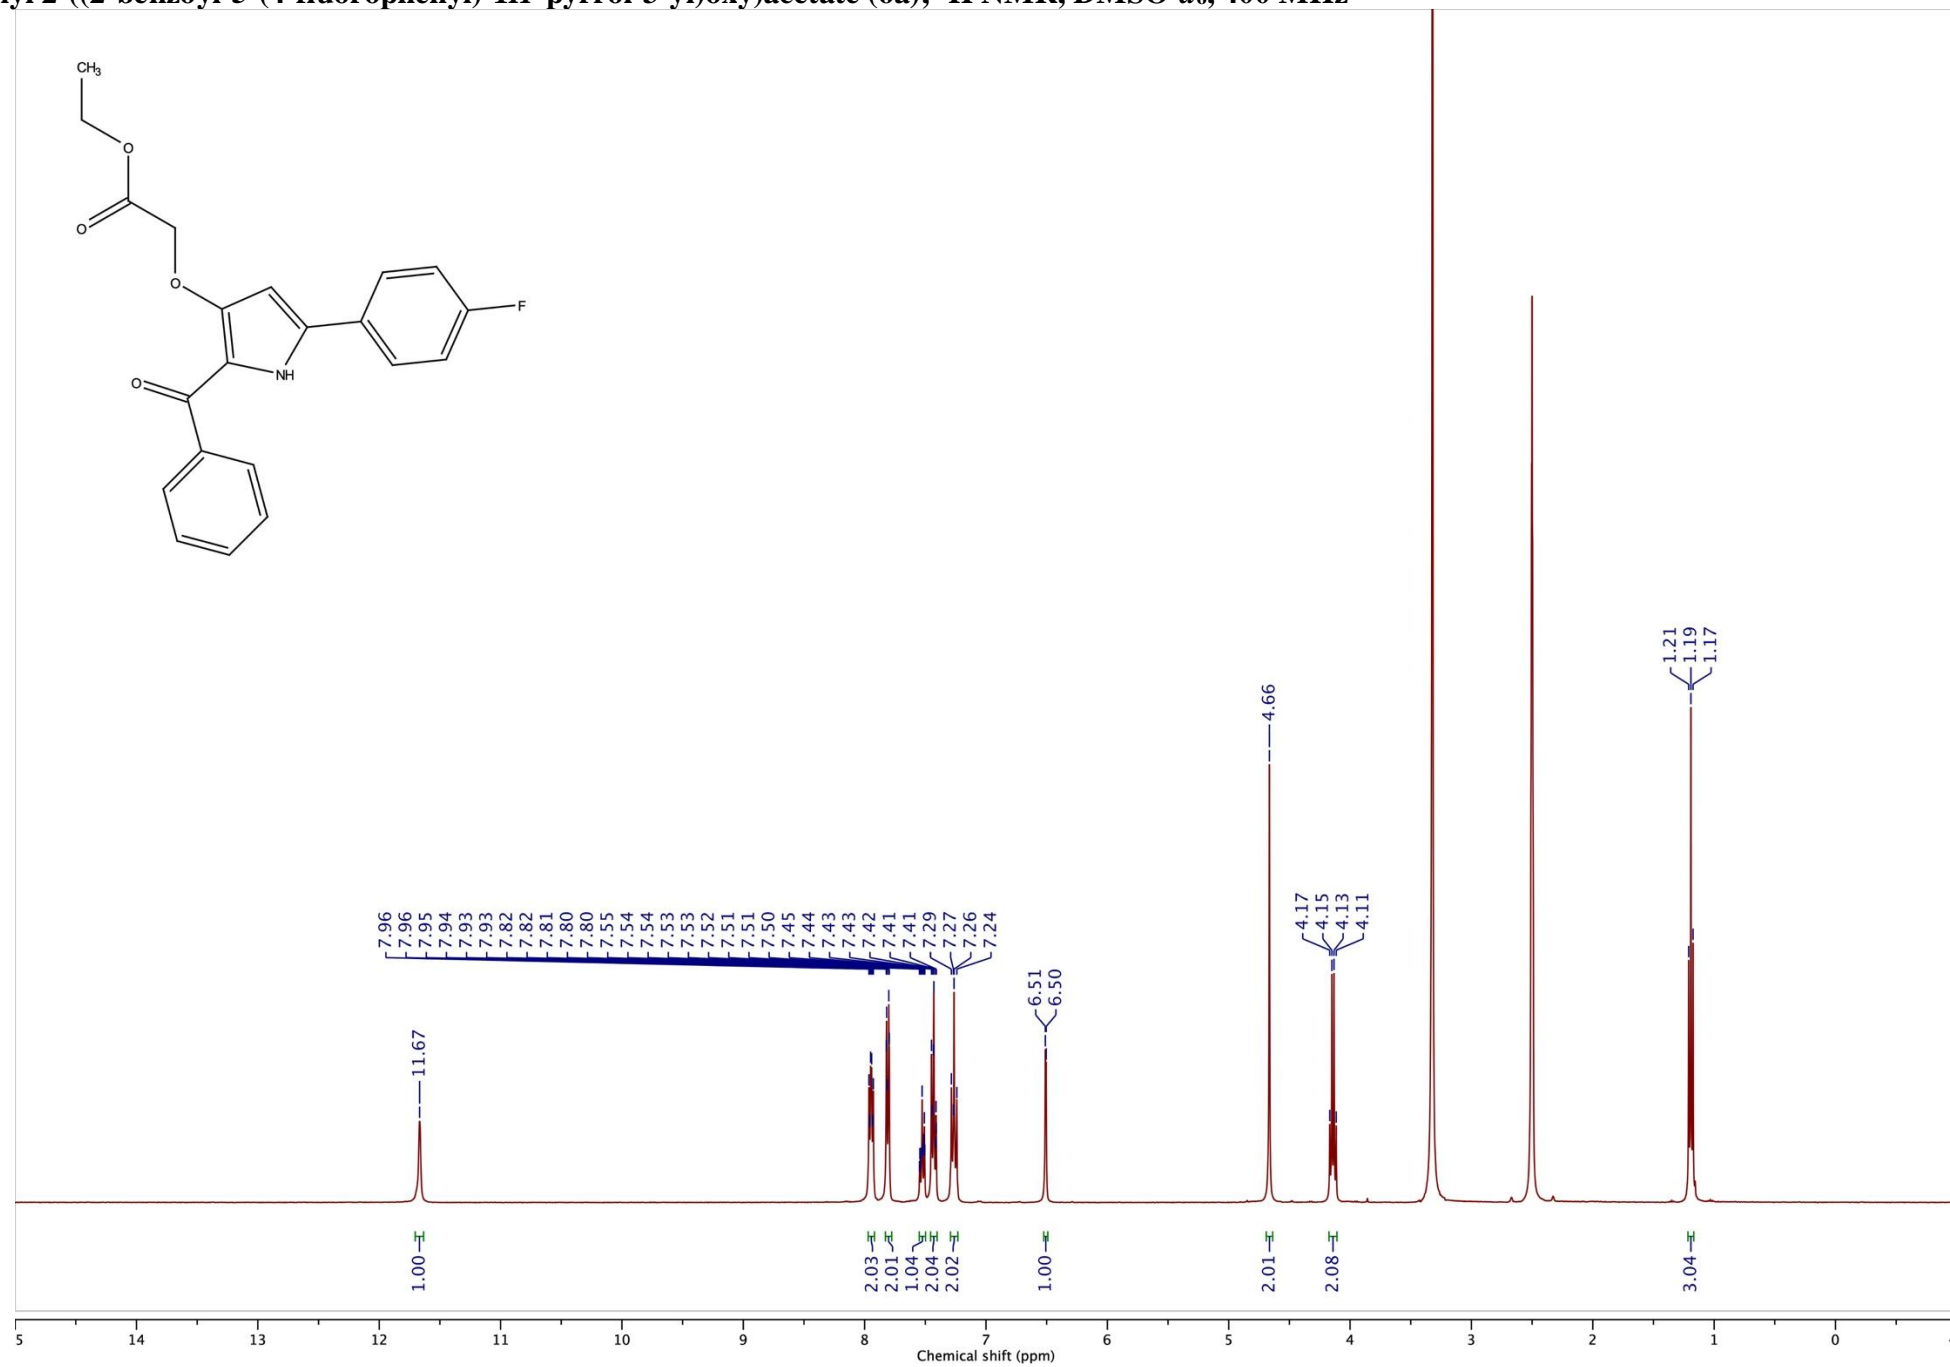

Ethyl 2-((2-benzoyl-5-(4-fluorophenyl)-1H-pyrrol-3-yl)oxy)acetate (6a),  $^{13}\text{C}\{^1\text{H}\}$  NMR, DMSO- $d_6$ , 100 MHz

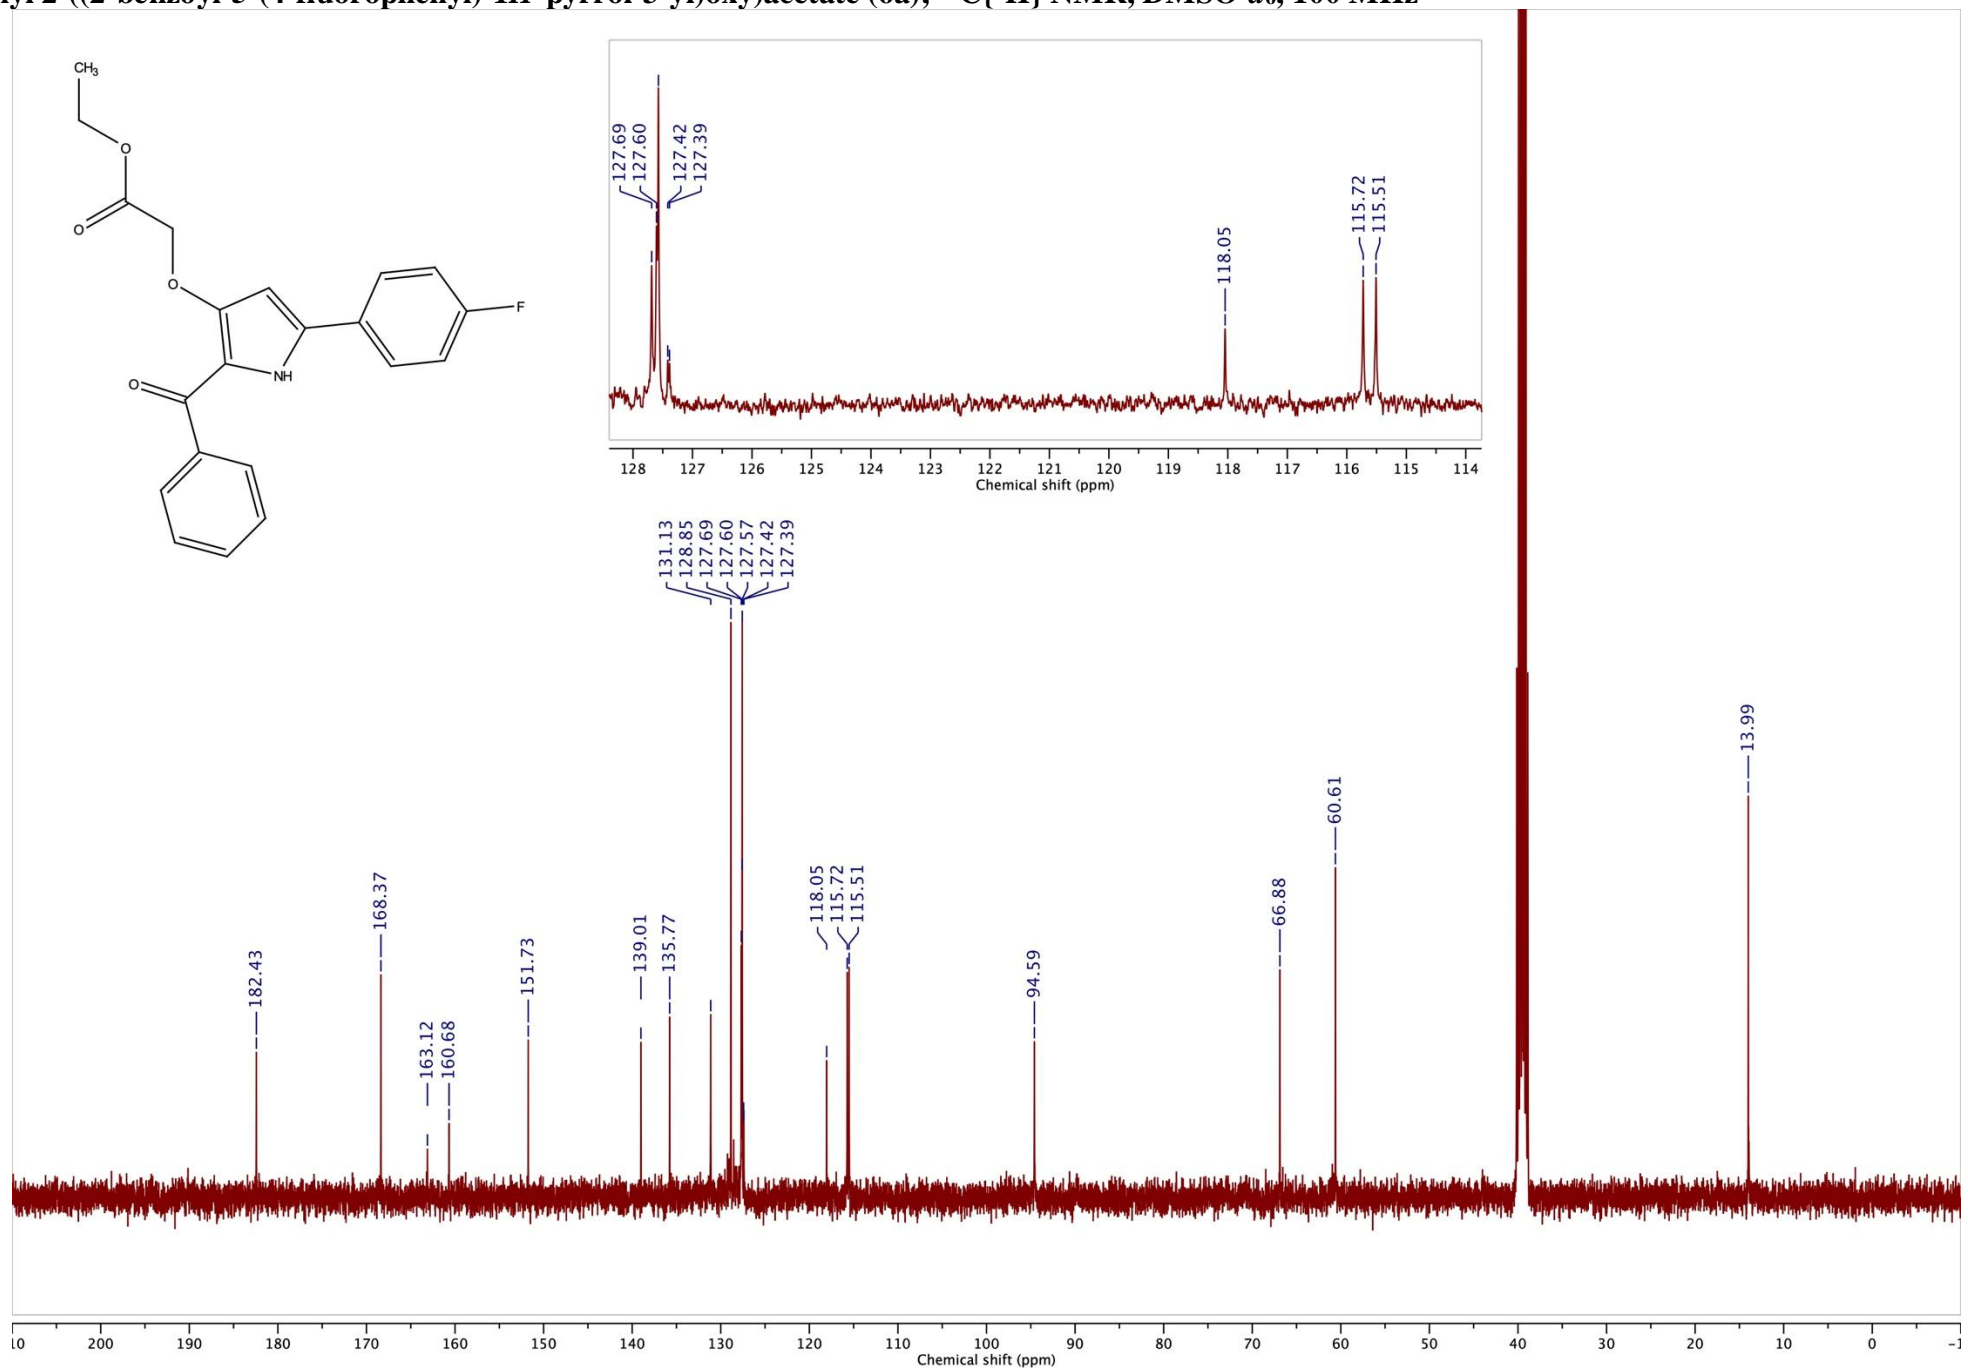

Ethyl 2-((2-benzoyl-5-(4-fluorophenyl)-1H-pyrrol-3-yl)oxy)acetate (6a), DEPT, DMSO-*d*<sub>6</sub>, 100 MHz

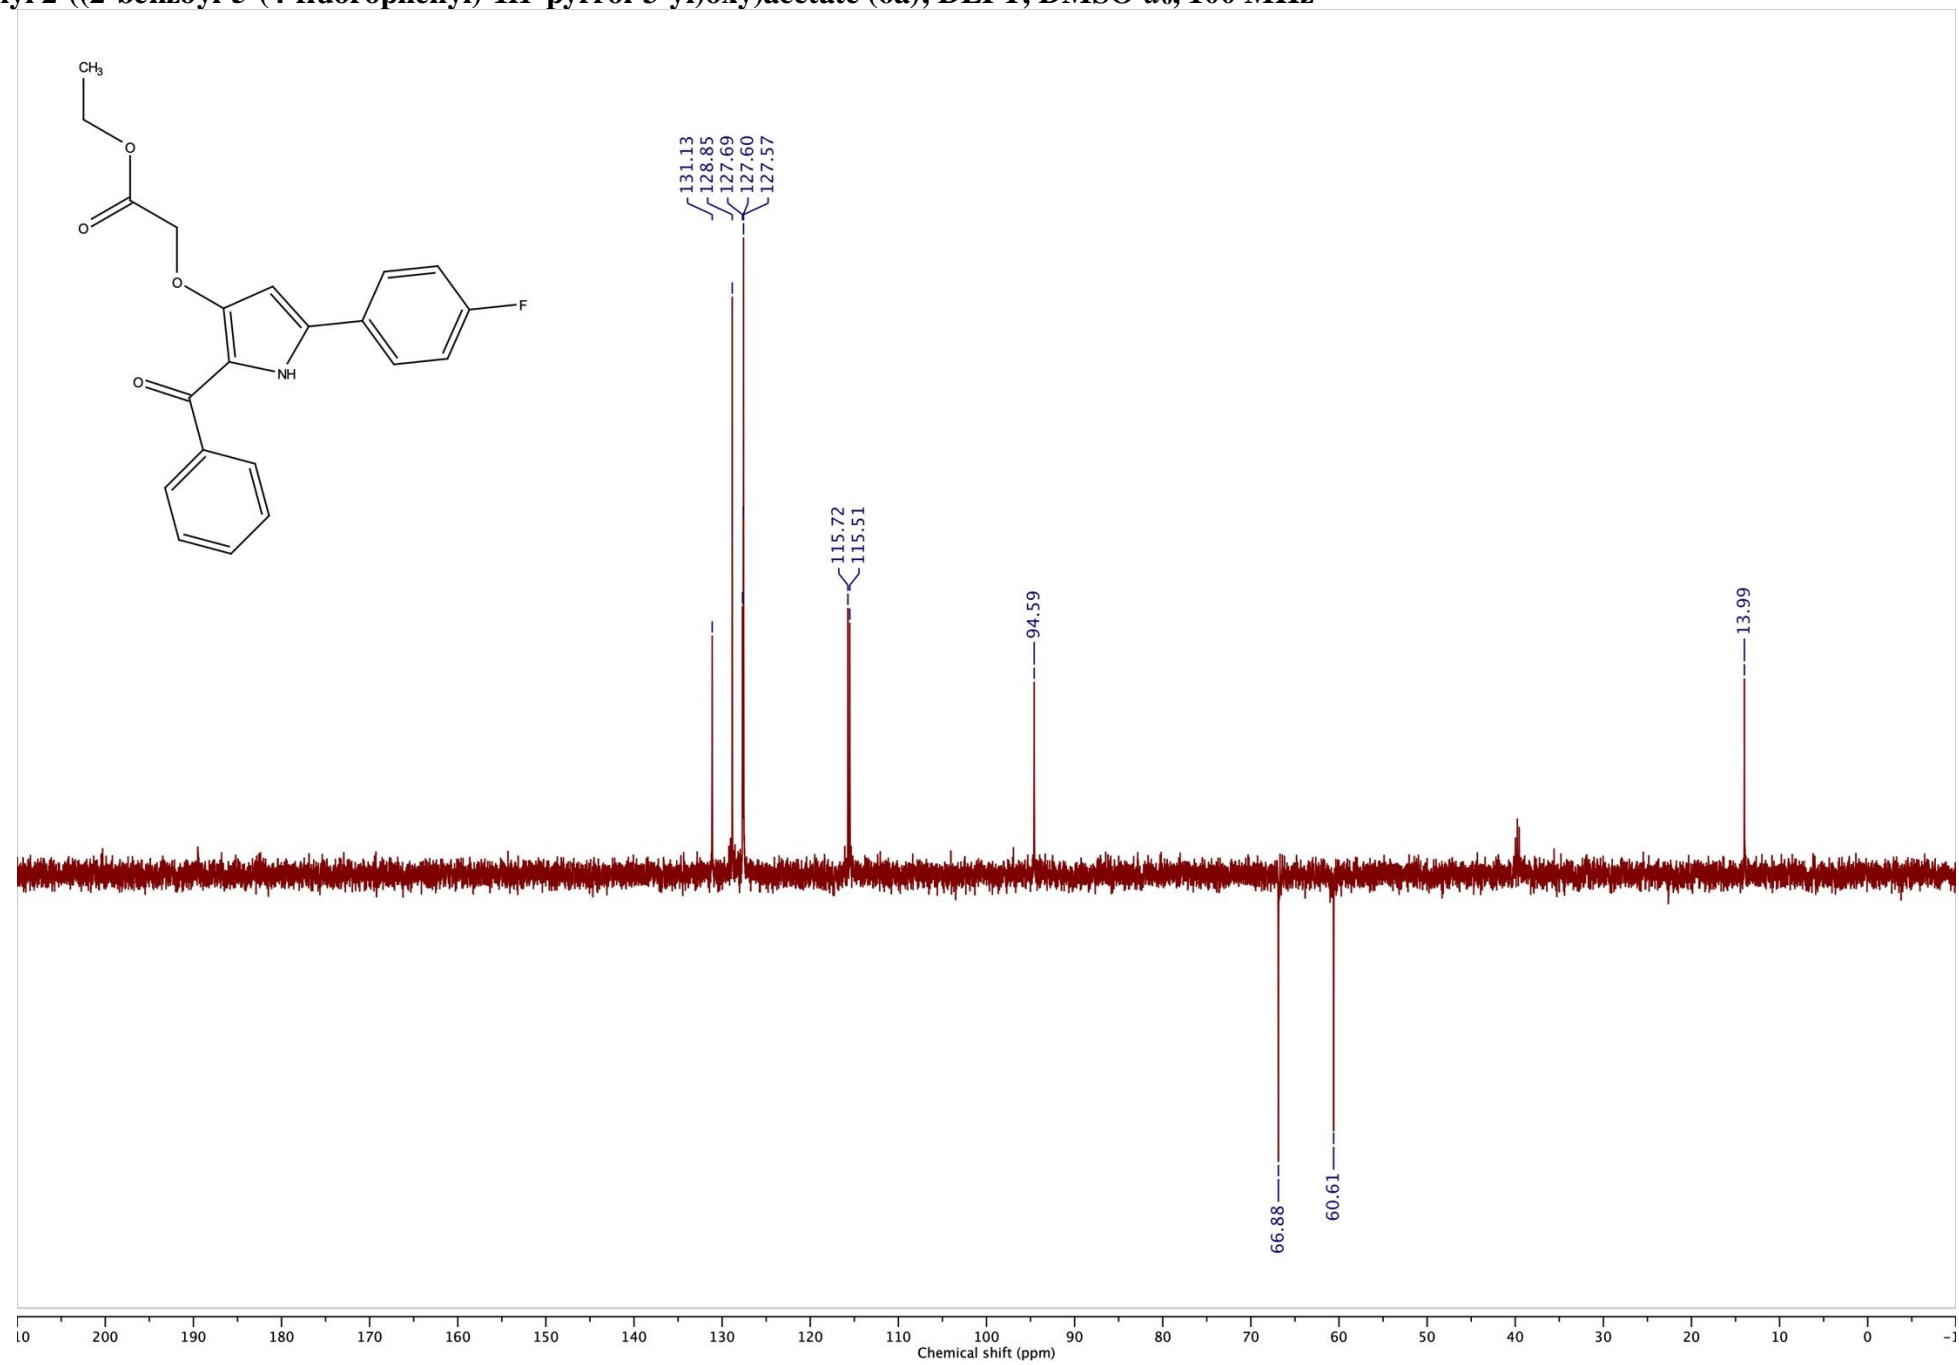

2-((2-Benzoyl-5-(4-fluorophenyl)-1H-pyrrol-3-yl)oxy)-1-phenylethan-1-one (6b), <sup>1</sup>H NMR, DMSO-d<sub>6</sub>, 400 MHz

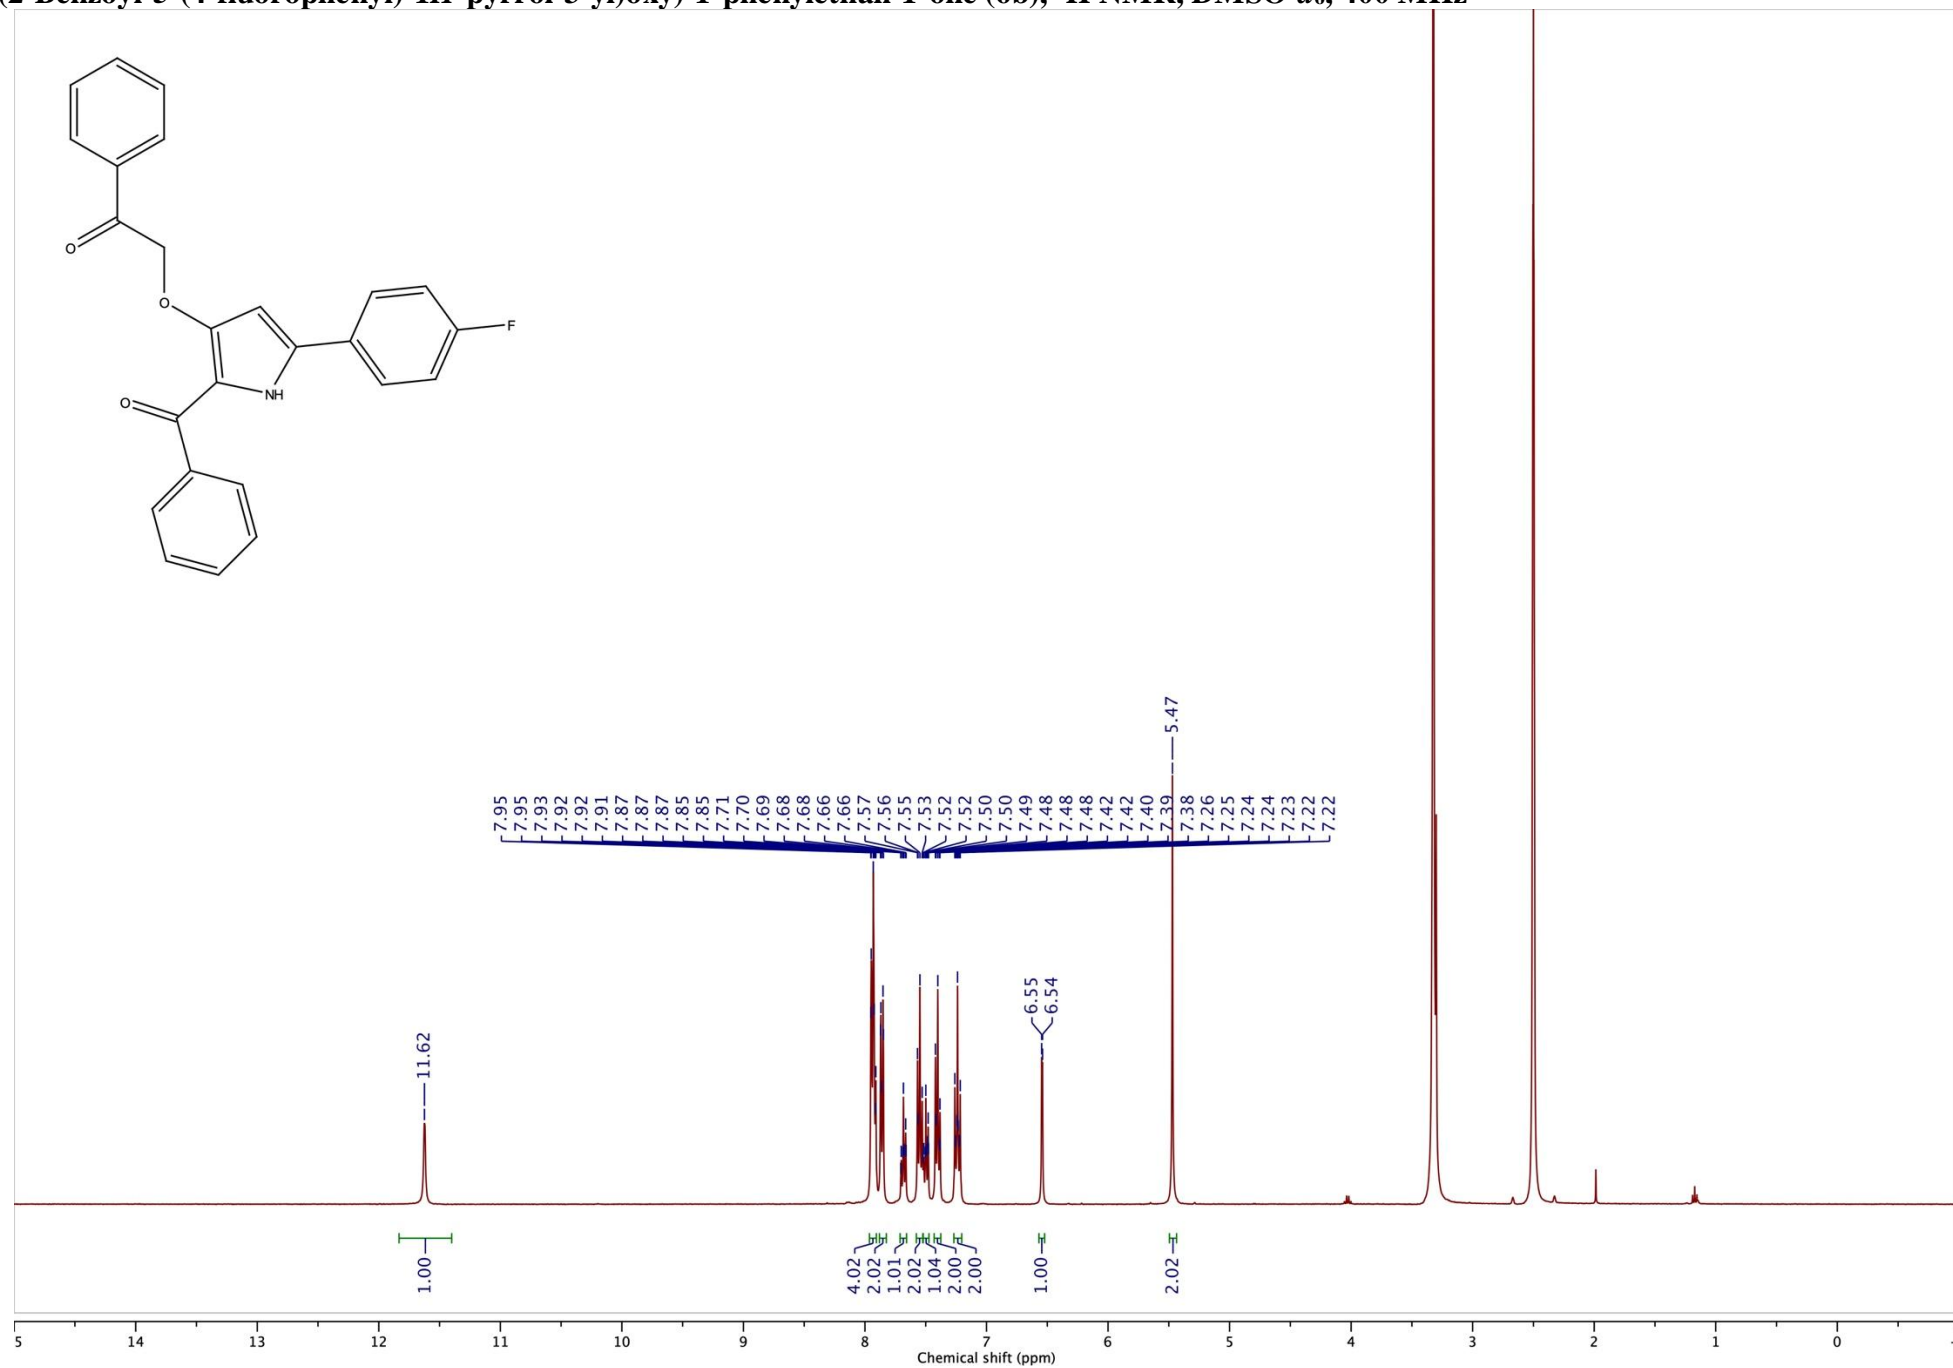

2-((2-Benzoyl-5-(4-fluorophenyl)-1H-pyrrol-3-yl)oxy)-1-phenylethan-1-one (6b),  $^{13}\text{C}\{^1\text{H}\}$  NMR, DMSO- $d_6$ , 100 MHz

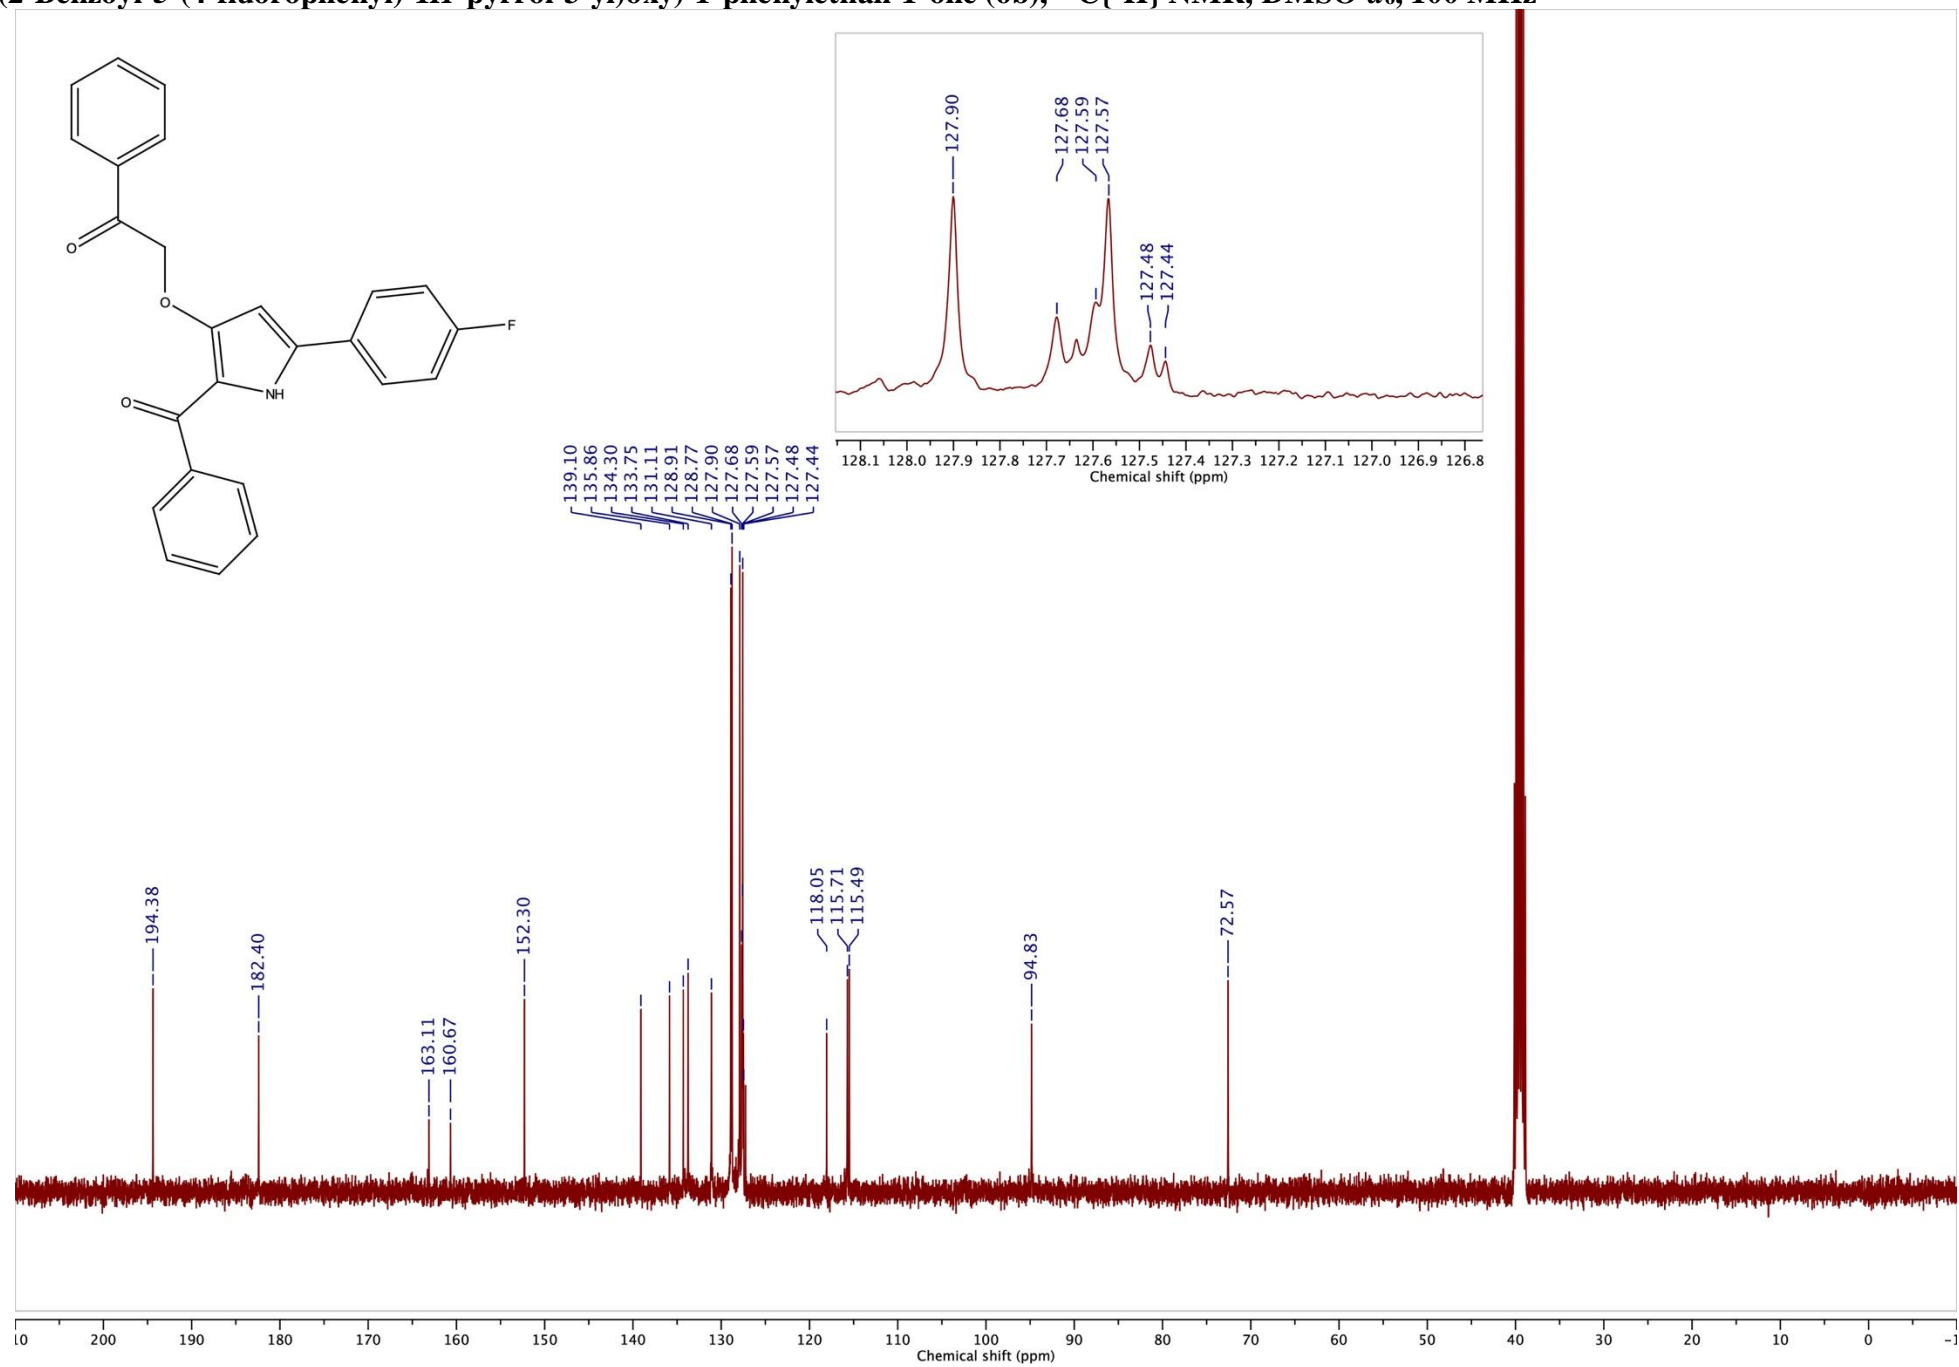

2-((2-Benzoyl-5-(4-fluorophenyl)-1H-pyrrol-3-yl)oxy)-1-phenylethan-1-one (6b), DEPT, DMSO-*d*<sub>6</sub>, 100 MHz

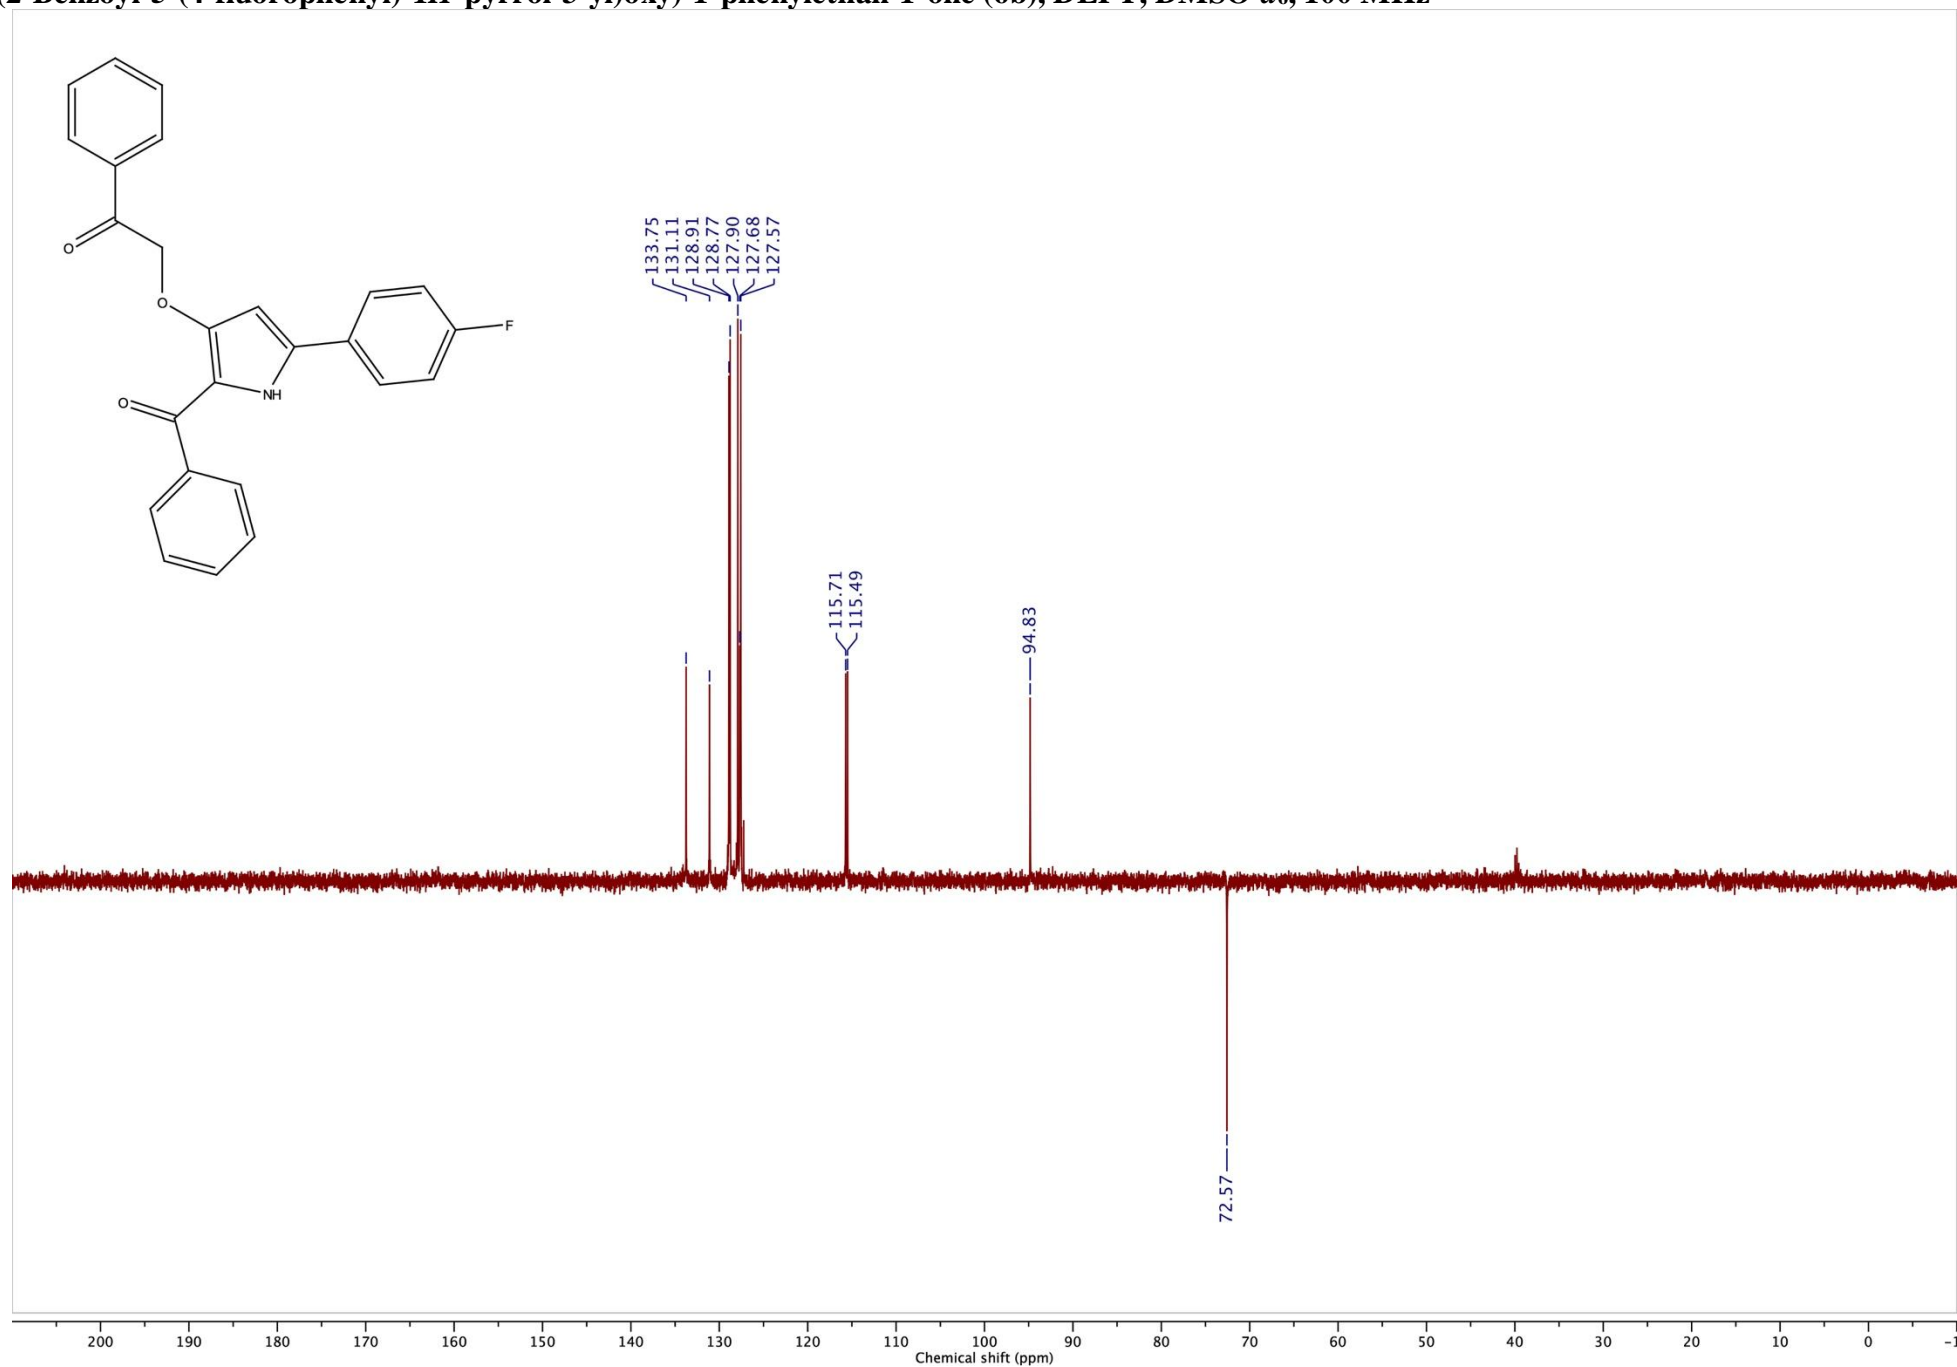

2-Benzoyl-5-(4-fluorophenyl)-1H-pyrrol-3-yl trifluoromethanesulfonate (7a), <sup>1</sup>H NMR, CDCl<sub>3</sub>, 400 MHz

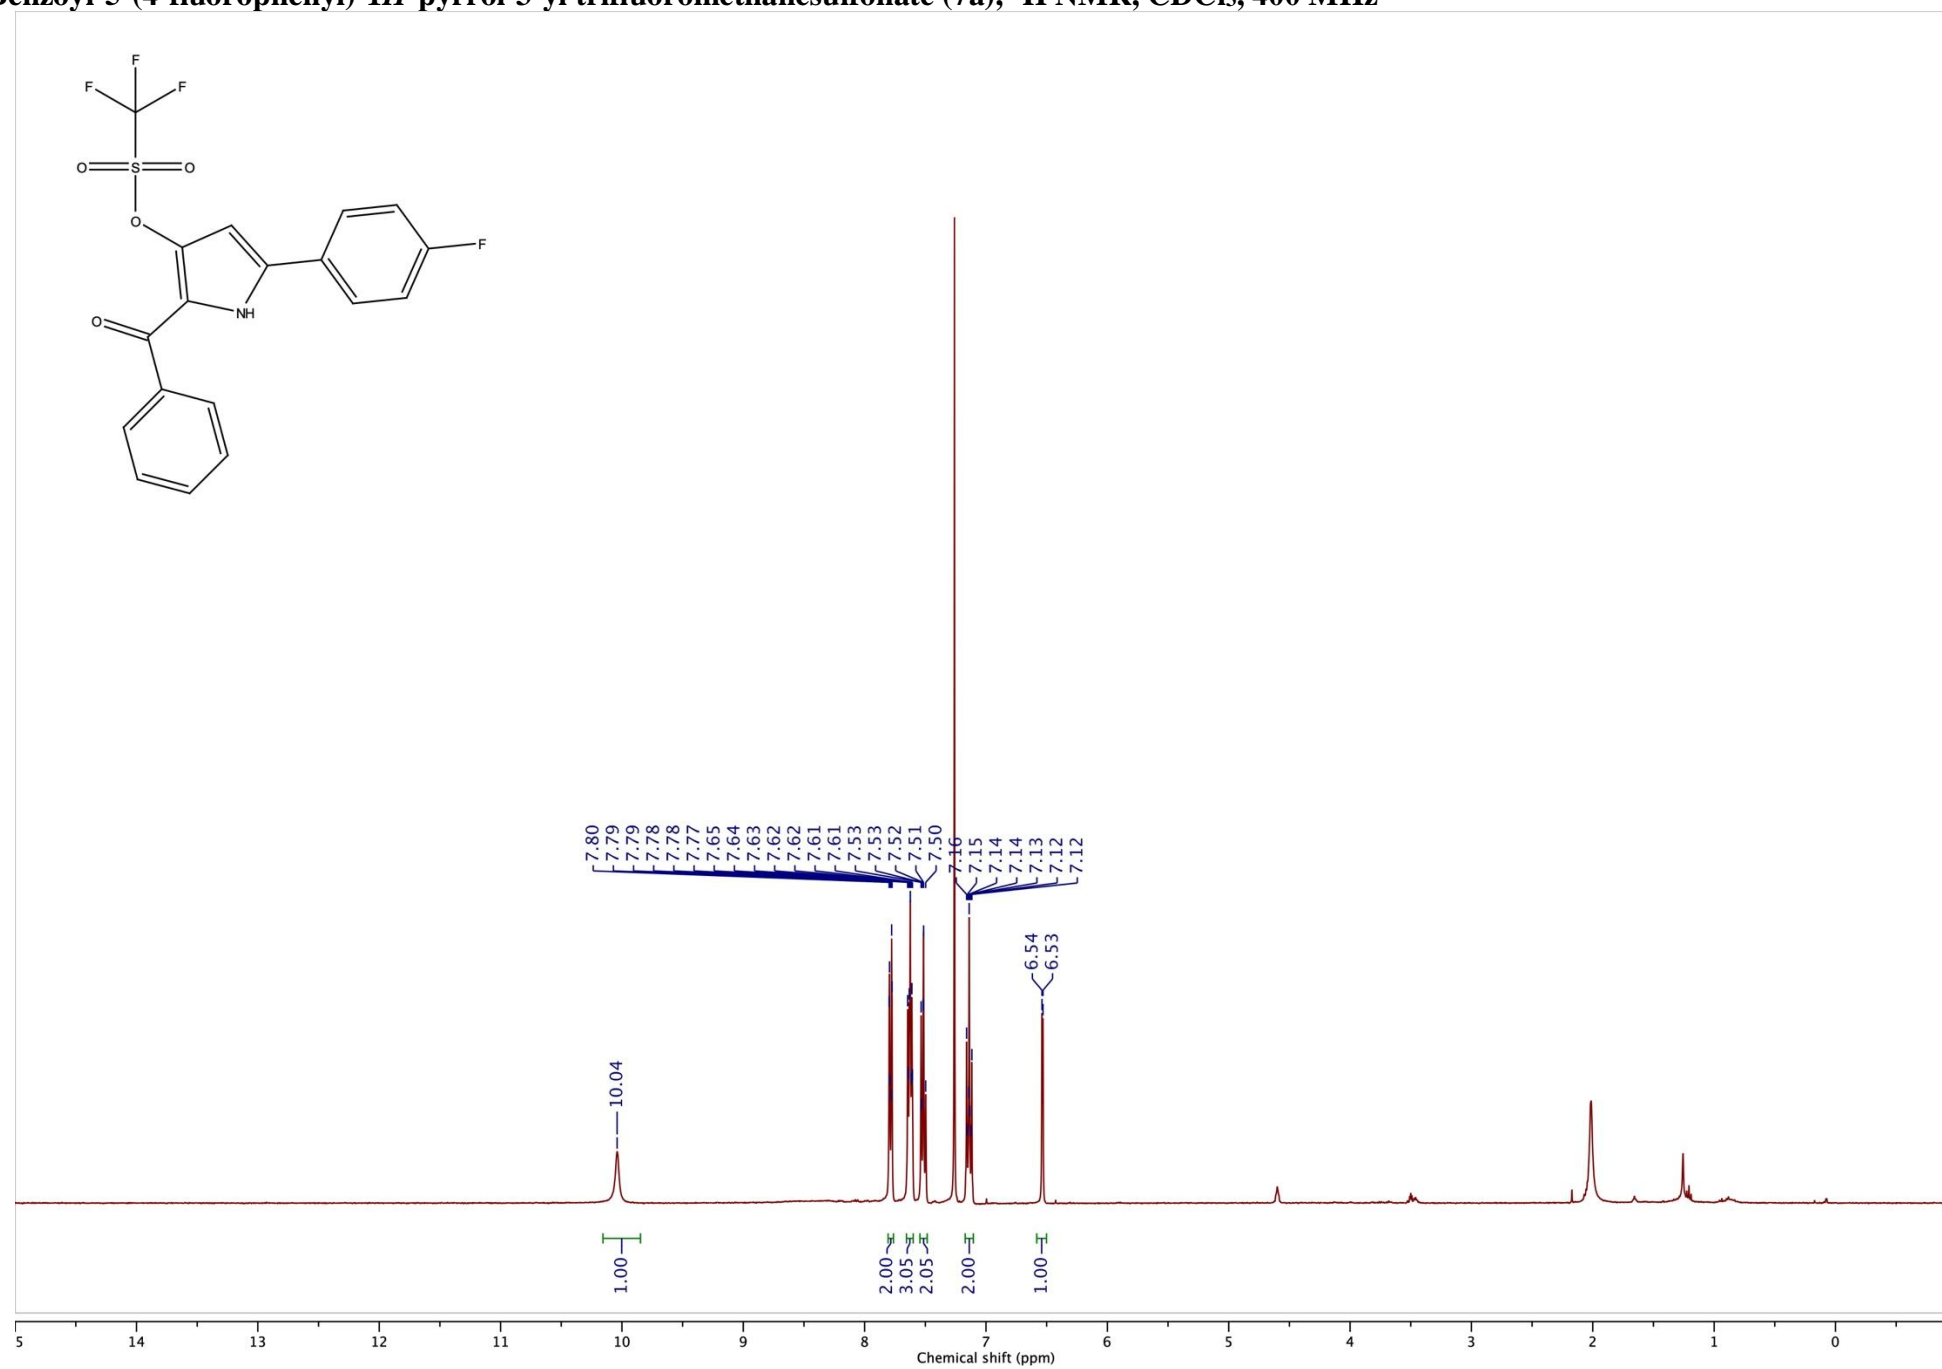

2-Benzoyl-5-(4-fluorophenyl)-1H-pyrrol-3-yl trifluoromethanesulfonate (7a),  $^{13}\text{C}\{^1\text{H}\}$  NMR,  $\text{CDCl}_3$ , 100 MHz

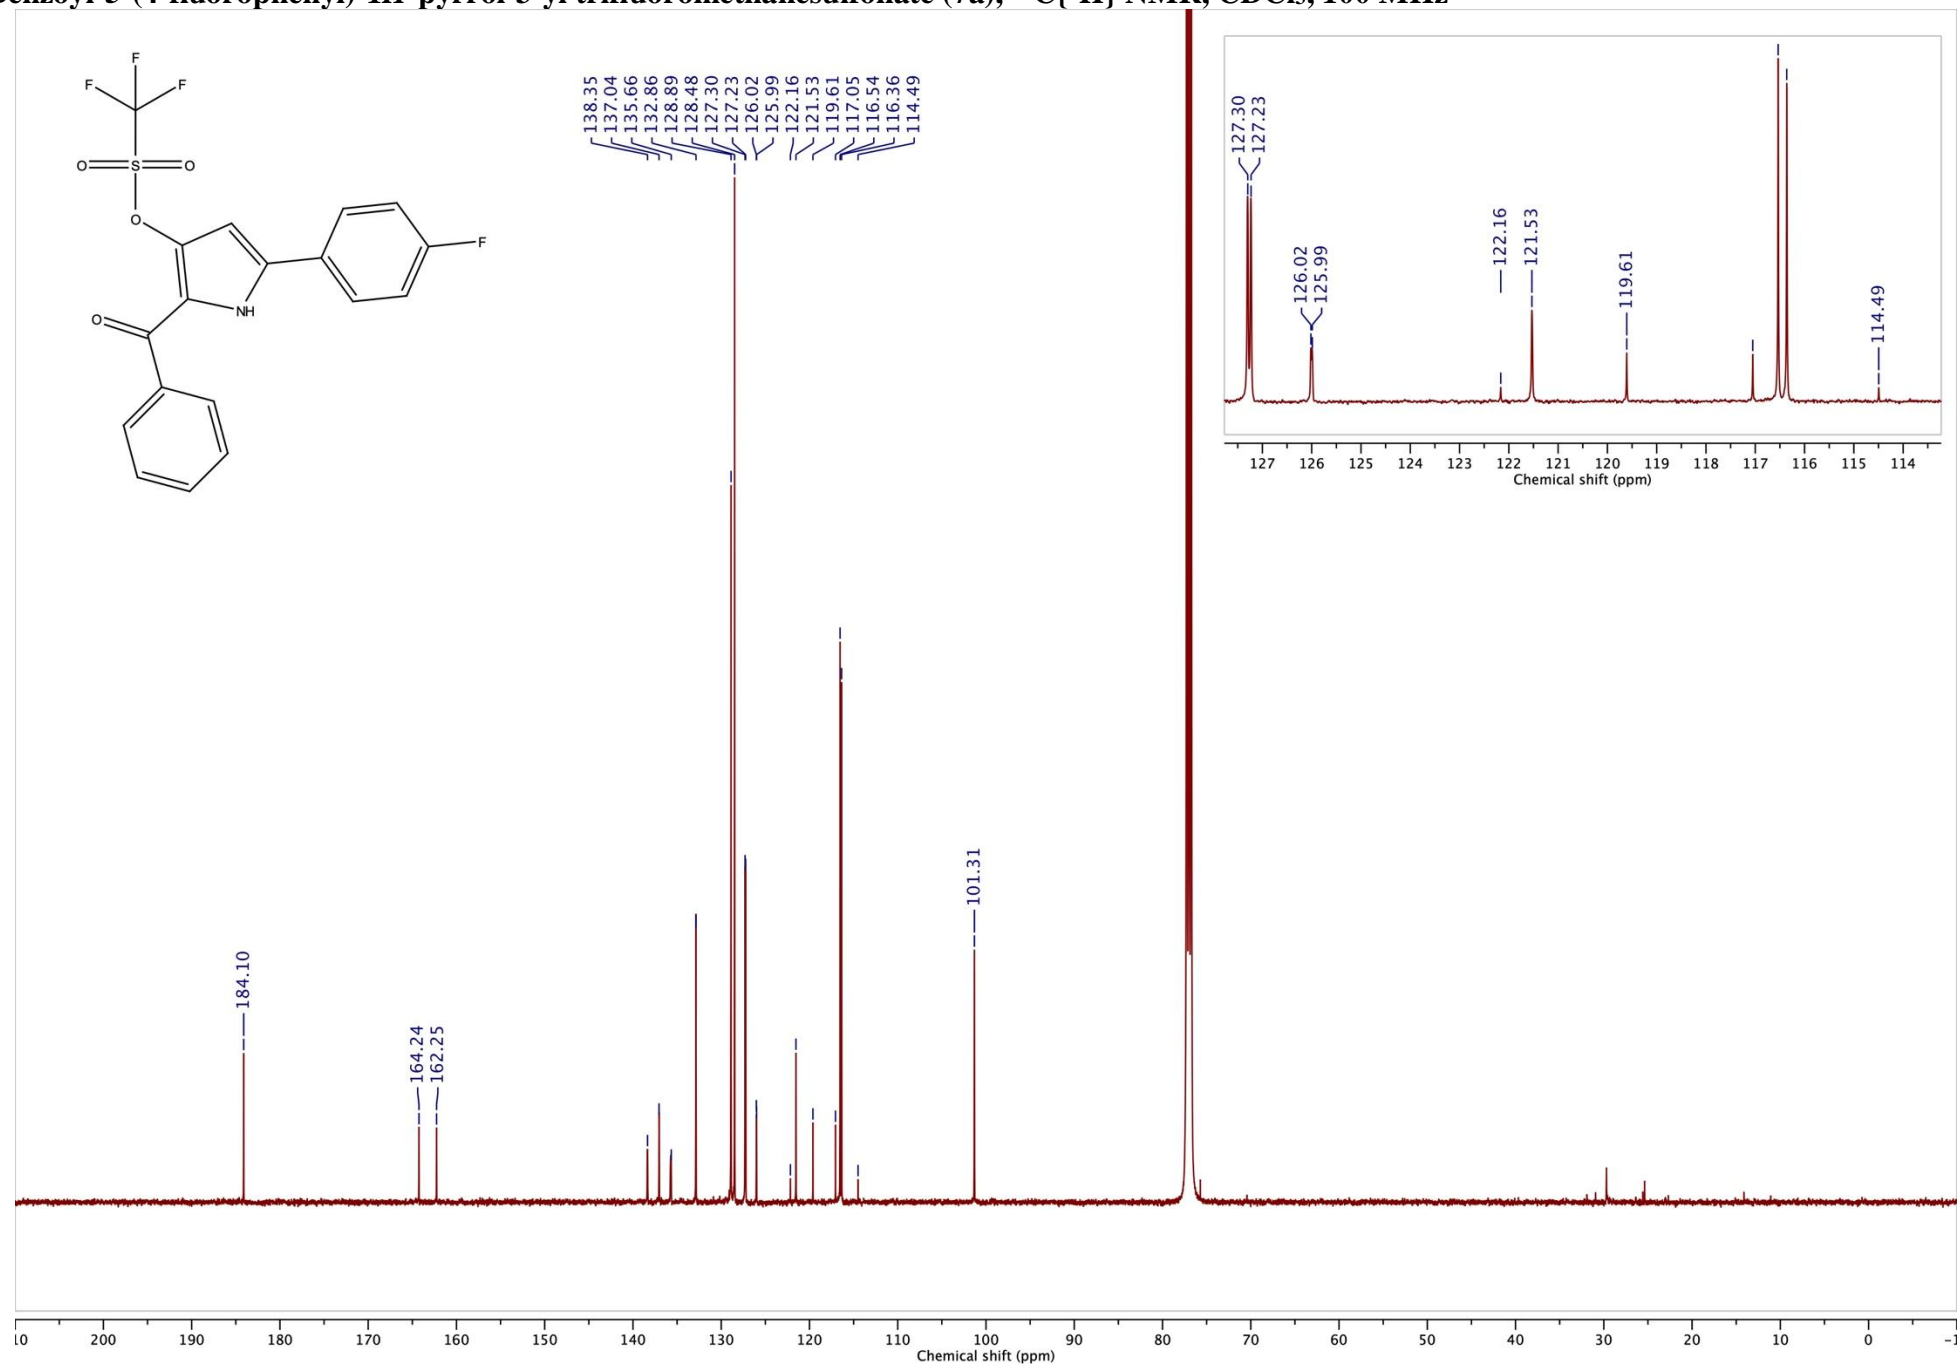

2-Benzoyl-5-(4-fluorophenyl)-1H-pyrrol-3-yl trifluoromethanesulfonate (7a), DEPT, CDCl<sub>3</sub>, 100 MHz

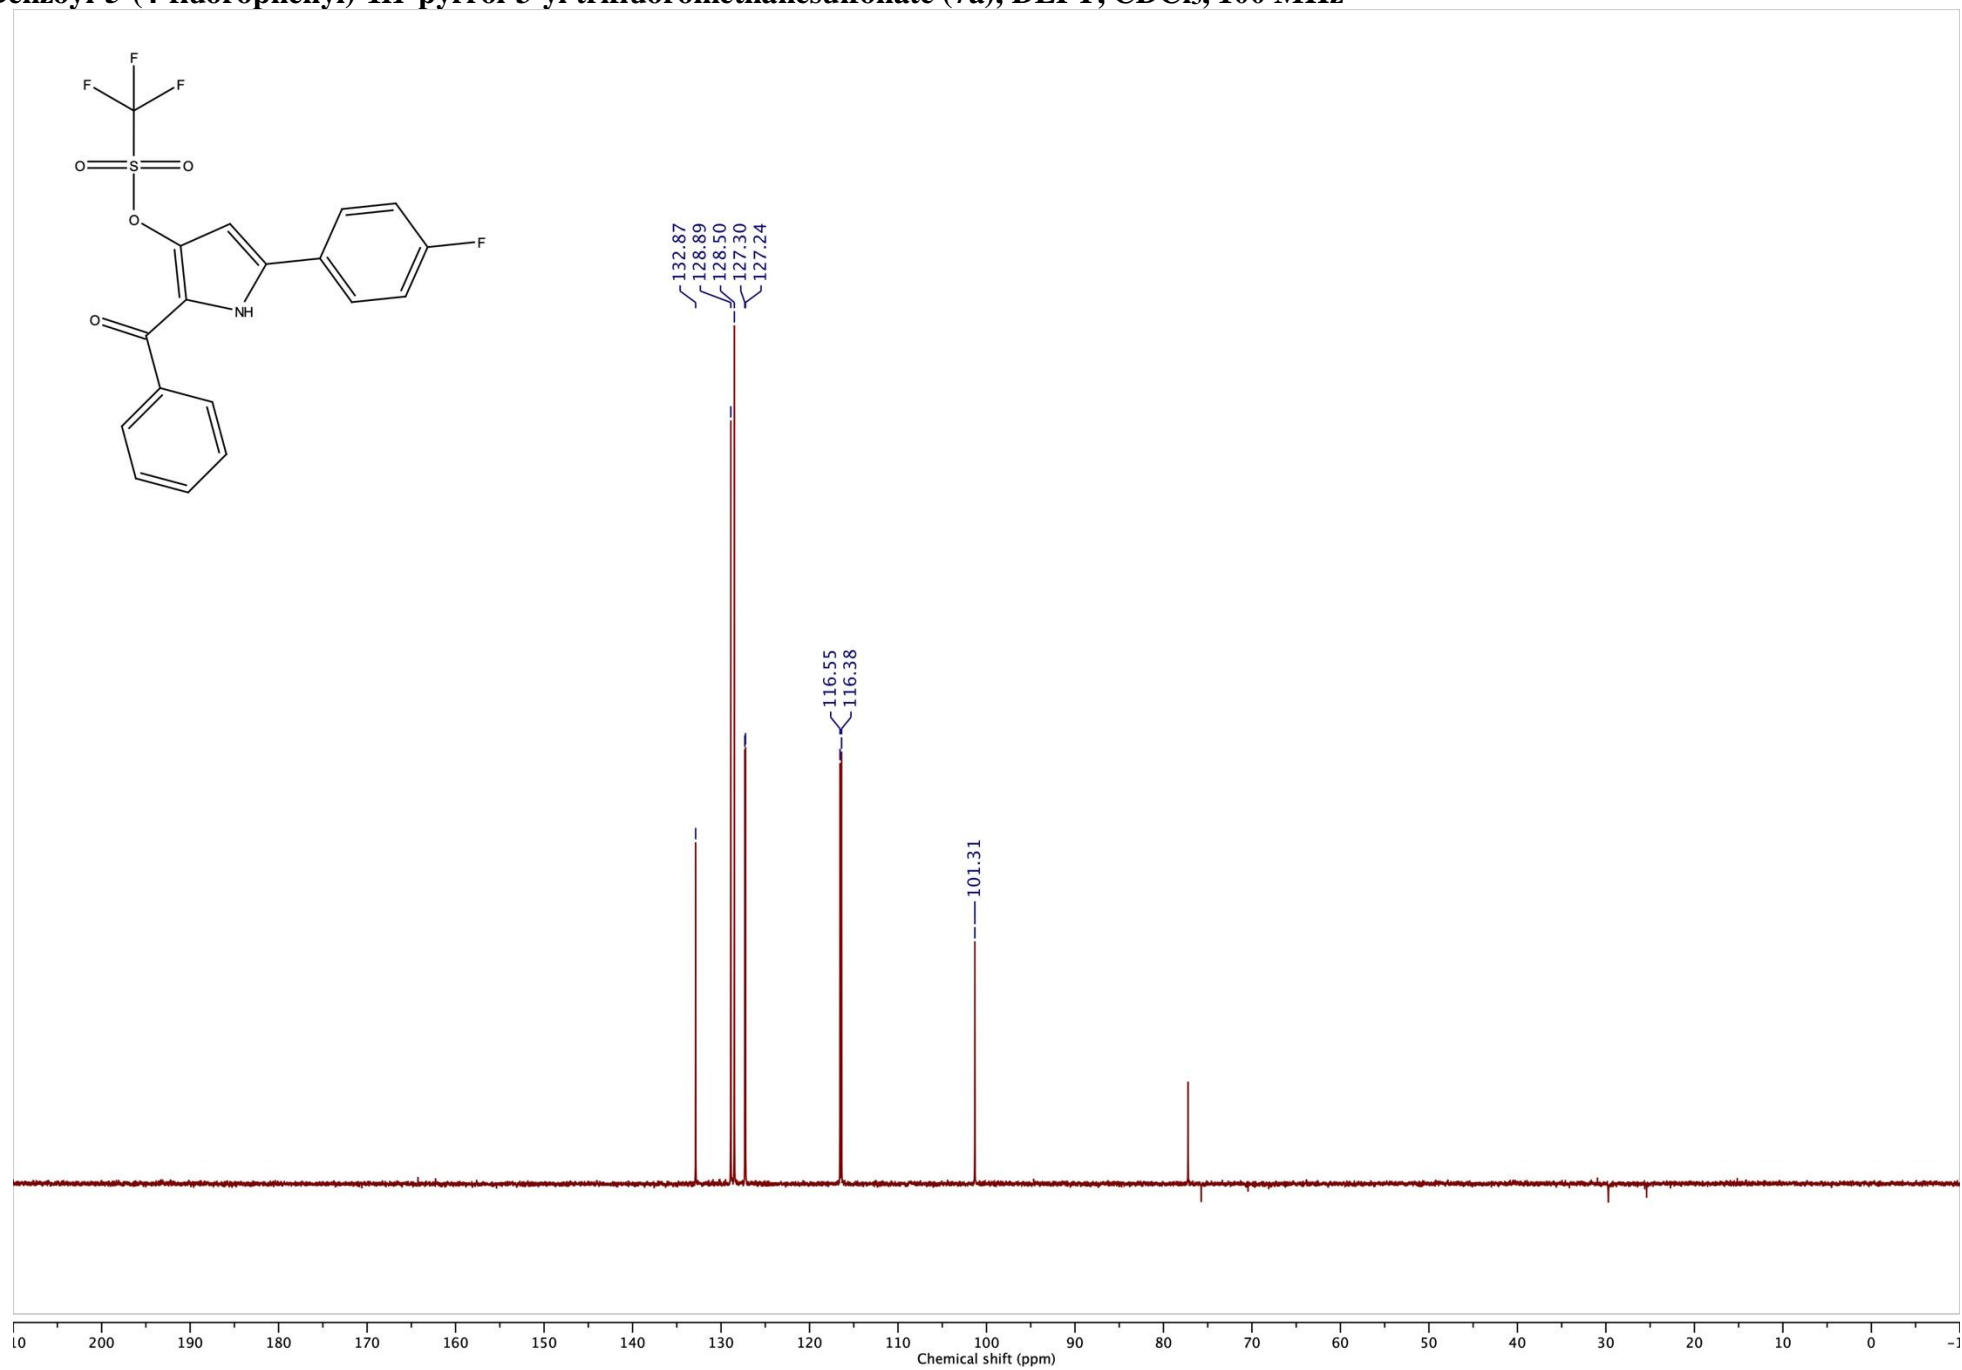

## 8. IR spectrum of compound 4b

(1*RR*,3*SR*,6*RR*)-4-Diazo-3-(4-iodophenyl)-1-(3-methoxyphenyl)-2-oxa-7-azabicyclo[4.1.0]heptan-5-one (4b), IR, KBr

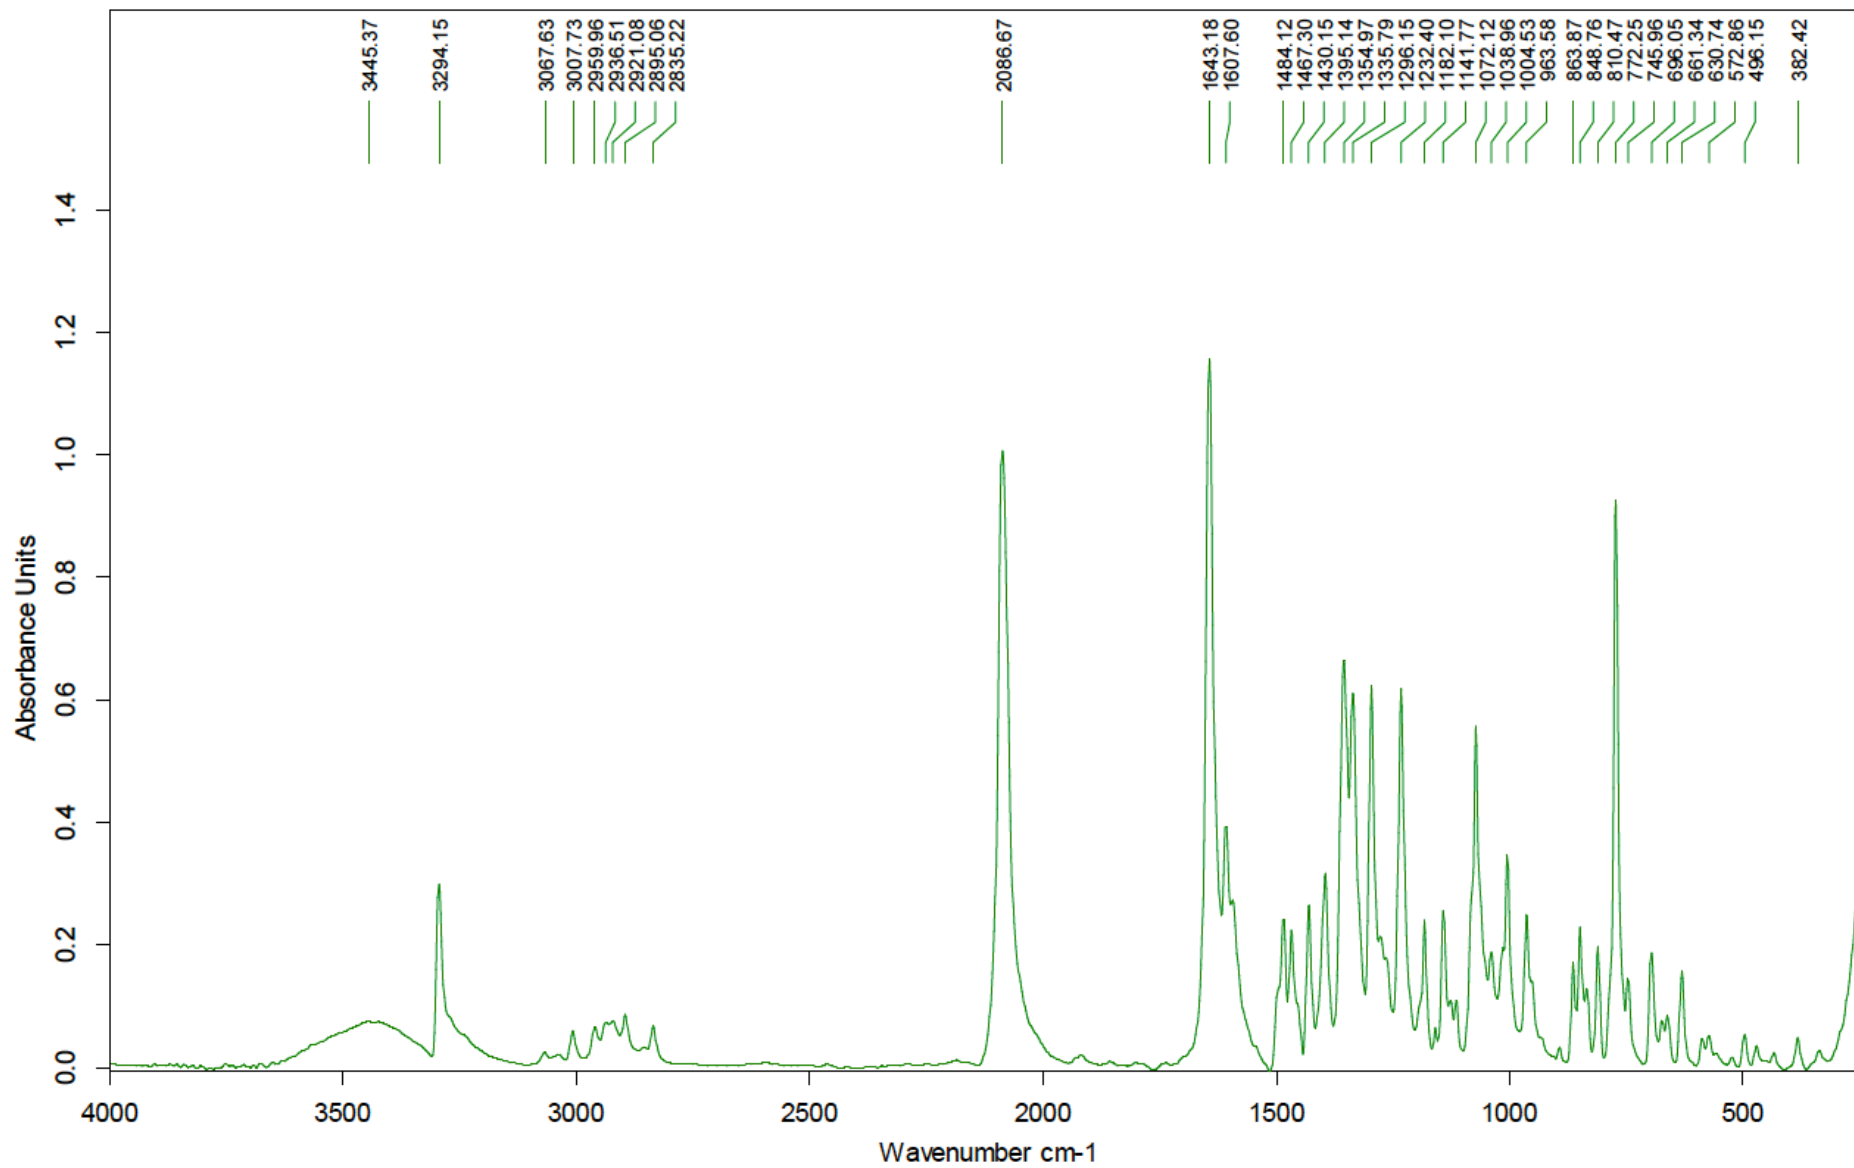

## 9. Computational details

All calculations were performed by using the Gaussian 16 suite of quantum chemical programs [11] at Resource center "Computer center of Saint Petersburg State University". Geometry optimizations of molecules were performed with the B3LYP-D3 [12,13] density functional method and 6-311+G(d,p) for H, C, N, O, S and LANL2DZ for Cs basis set using SMD [14] solvent model for MeCN. Stationary points on the respective potential-energy surfaces were characterized at the same level of theory by evaluating the corresponding Hessian indices. Careful verification of the unique imaginary frequencies for transition states was carried out to check whether the frequency indeed pertains to the desired reaction coordinate.

**Table S8.** Absolute Energies (au), Cartesian Coordinates of stationary points

|                                                                                                                                                                                                                                                                                                                                                                                                                                                                                                                                                                                                                                                                                                                                                                                                                                                                                                                                                                                                                                                                                                                                                                                                                                                                                                                                                                                                                                                                                                                                                                                                                                                                                                                                                                                                                                                                       |            |            |            |            |   |           |           |            |   |            |           |            |   |           |           |           |    |           |            |            |                                                                                                                                                                                                                                                                                                                                                                                                                                                                                                                                                                                                                                |           |           |            |            |           |            |            |            |           |            |           |            |            |           |            |            |            |            |           |   |            |           |           |   |            |           |           |   |            |            |            |   |            |            |            |   |            |           |           |   |            |           |           |   |            |            |           |   |            |            |            |   |            |            |            |   |           |            |            |                                                                                                                                                                                                                                                                                                                                                                                                                                                                                                                                                                                                                                                                                                                                                                                                                                                                                                                                                                                                                                                                                                                                                                                                                                                                                                                                                                                                  |   |            |           |           |   |            |            |            |   |            |           |            |   |            |           |           |   |           |           |           |   |            |            |           |   |           |           |            |   |            |           |           |   |           |            |           |   |            |            |           |   |           |            |            |   |           |           |            |   |           |            |           |   |           |            |            |
|-----------------------------------------------------------------------------------------------------------------------------------------------------------------------------------------------------------------------------------------------------------------------------------------------------------------------------------------------------------------------------------------------------------------------------------------------------------------------------------------------------------------------------------------------------------------------------------------------------------------------------------------------------------------------------------------------------------------------------------------------------------------------------------------------------------------------------------------------------------------------------------------------------------------------------------------------------------------------------------------------------------------------------------------------------------------------------------------------------------------------------------------------------------------------------------------------------------------------------------------------------------------------------------------------------------------------------------------------------------------------------------------------------------------------------------------------------------------------------------------------------------------------------------------------------------------------------------------------------------------------------------------------------------------------------------------------------------------------------------------------------------------------------------------------------------------------------------------------------------------------|------------|------------|------------|------------|---|-----------|-----------|------------|---|------------|-----------|------------|---|-----------|-----------|-----------|----|-----------|------------|------------|--------------------------------------------------------------------------------------------------------------------------------------------------------------------------------------------------------------------------------------------------------------------------------------------------------------------------------------------------------------------------------------------------------------------------------------------------------------------------------------------------------------------------------------------------------------------------------------------------------------------------------|-----------|-----------|------------|------------|-----------|------------|------------|------------|-----------|------------|-----------|------------|------------|-----------|------------|------------|------------|------------|-----------|---|------------|-----------|-----------|---|------------|-----------|-----------|---|------------|------------|------------|---|------------|------------|------------|---|------------|-----------|-----------|---|------------|-----------|-----------|---|------------|------------|-----------|---|------------|------------|------------|---|------------|------------|------------|---|-----------|------------|------------|--------------------------------------------------------------------------------------------------------------------------------------------------------------------------------------------------------------------------------------------------------------------------------------------------------------------------------------------------------------------------------------------------------------------------------------------------------------------------------------------------------------------------------------------------------------------------------------------------------------------------------------------------------------------------------------------------------------------------------------------------------------------------------------------------------------------------------------------------------------------------------------------------------------------------------------------------------------------------------------------------------------------------------------------------------------------------------------------------------------------------------------------------------------------------------------------------------------------------------------------------------------------------------------------------------------------------------------------------------------------------------------------------|---|------------|-----------|-----------|---|------------|------------|------------|---|------------|-----------|------------|---|------------|-----------|-----------|---|-----------|-----------|-----------|---|------------|------------|-----------|---|-----------|-----------|------------|---|------------|-----------|-----------|---|-----------|------------|-----------|---|------------|------------|-----------|---|-----------|------------|------------|---|-----------|-----------|------------|---|-----------|------------|-----------|---|-----------|------------|------------|
| <p><b>Molecule 1a</b></p> 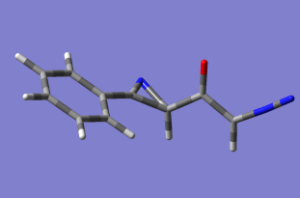 <p>E = -624.842788, H (0K) = -624.692423,<br/>H (298K) = -624.680396,<br/>G (298K) = -624.732869 au.<br/>Imaginary frequency = 0.</p> <table border="1"> <tbody> <tr><td>N</td><td>0.1535660</td><td>2.1418480</td><td>-0.1844330</td></tr> <tr><td>C</td><td>0.9735200</td><td>0.9921690</td><td>-0.8197530</td></tr> <tr><td>C</td><td>2.0209370</td><td>0.3681980</td><td>0.0456220</td></tr> <tr><td>O</td><td>1.9158670</td><td>0.3165810</td><td>1.2704370</td></tr> <tr><td>C</td><td>3.1516100</td><td>-0.1696720</td><td>-0.6881320</td></tr> <tr><td>H</td><td>1.1935240</td><td>1.0850710</td><td>-1.8790840</td></tr> <tr><td>N</td><td>4.0918420</td><td>-0.7633600</td><td>0.0029620</td></tr> <tr><td>N</td><td>4.8657780</td><td>-1.2607050</td><td>0.6523620</td></tr> <tr><td>C</td><td>-1.6417980</td><td>0.3077180</td><td>-0.1629270</td></tr> <tr><td>C</td><td>-4.0098760</td><td>-1.1080900</td><td>0.1980380</td></tr> <tr><td>C</td><td>-3.9393120</td><td>0.2370610</td><td>0.5749300</td></tr> <tr><td>C</td><td>-2.7591680</td><td>0.9483820</td><td>0.3974260</td></tr> <tr><td>C</td><td>-1.7133860</td><td>-1.0400940</td><td>-0.5404890</td></tr> <tr><td>C</td><td>-2.8995550</td><td>-1.7454090</td><td>-0.3581770</td></tr> <tr><td>H</td><td>-2.6921570</td><td>1.9910400</td><td>0.6865610</td></tr> <tr><td>H</td><td>-4.8051420</td><td>0.7256760</td><td>1.0067890</td></tr> <tr><td>H</td><td>-4.9332110</td><td>-1.6587220</td><td>0.3395890</td></tr> <tr><td>H</td><td>-2.9588640</td><td>-2.7881400</td><td>-0.6477480</td></tr> <tr><td>H</td><td>-0.8422100</td><td>-1.5215900</td><td>-0.9699940</td></tr> <tr><td>H</td><td>3.2893650</td><td>-0.1254190</td><td>-1.7588600</td></tr> </tbody> </table> | N          | 0.1535660  | 2.1418480  | -0.1844330 | C | 0.9735200 | 0.9921690 | -0.8197530 | C | 2.0209370  | 0.3681980 | 0.0456220  | O | 1.9158670 | 0.3165810 | 1.2704370 | C  | 3.1516100 | -0.1696720 | -0.6881320 | H                                                                                                                                                                                                                                                                                                                                                                                                                                                                                                                                                                                                                              | 1.1935240 | 1.0850710 | -1.8790840 | N          | 4.0918420 | -0.7633600 | 0.0029620  | N          | 4.8657780 | -1.2607050 | 0.6523620 | C          | -1.6417980 | 0.3077180 | -0.1629270 | C          | -4.0098760 | -1.1080900 | 0.1980380 | C | -3.9393120 | 0.2370610 | 0.5749300 | C | -2.7591680 | 0.9483820 | 0.3974260 | C | -1.7133860 | -1.0400940 | -0.5404890 | C | -2.8995550 | -1.7454090 | -0.3581770 | H | -2.6921570 | 1.9910400 | 0.6865610 | H | -4.8051420 | 0.7256760 | 1.0067890 | H | -4.9332110 | -1.6587220 | 0.3395890 | H | -2.9588640 | -2.7881400 | -0.6477480 | H | -0.8422100 | -1.5215900 | -0.9699940 | H | 3.2893650 | -0.1254190 | -1.7588600 | <p><b>Molecule 2c</b></p>  <p>E = -345.690330, H (0K) = -345.580953,<br/>H (298K) = -345.573677,<br/>G (298K) = -345.611546 au.<br/>Imaginary frequency = 0.</p> <table border="1"> <tbody> <tr><td>C</td><td>-1.9874290</td><td>0.4657850</td><td>0.0000220</td></tr> <tr><td>O</td><td>-2.8519050</td><td>-0.3934010</td><td>-0.0000230</td></tr> <tr><td>H</td><td>-2.2644570</td><td>1.5376200</td><td>-0.0000510</td></tr> <tr><td>C</td><td>-0.5355200</td><td>0.2031200</td><td>0.0000150</td></tr> <tr><td>C</td><td>0.3510190</td><td>1.2883970</td><td>0.0000100</td></tr> <tr><td>C</td><td>-0.0361400</td><td>-1.1085550</td><td>0.0000110</td></tr> <tr><td>C</td><td>1.7264170</td><td>1.0668920</td><td>-0.0000090</td></tr> <tr><td>H</td><td>-0.0413170</td><td>2.3004780</td><td>0.0000190</td></tr> <tr><td>C</td><td>1.3357370</td><td>-1.3268530</td><td>0.0000020</td></tr> <tr><td>H</td><td>-0.7311290</td><td>-1.9404310</td><td>0.0000180</td></tr> <tr><td>C</td><td>2.2171120</td><td>-0.2394330</td><td>-0.0000100</td></tr> <tr><td>H</td><td>2.4125090</td><td>1.9061930</td><td>-0.0000160</td></tr> <tr><td>H</td><td>1.7249550</td><td>-2.3387590</td><td>0.0000030</td></tr> <tr><td>H</td><td>3.2875020</td><td>-0.4140140</td><td>-0.0000280</td></tr> </tbody> </table> | C | -1.9874290 | 0.4657850 | 0.0000220 | O | -2.8519050 | -0.3934010 | -0.0000230 | H | -2.2644570 | 1.5376200 | -0.0000510 | C | -0.5355200 | 0.2031200 | 0.0000150 | C | 0.3510190 | 1.2883970 | 0.0000100 | C | -0.0361400 | -1.1085550 | 0.0000110 | C | 1.7264170 | 1.0668920 | -0.0000090 | H | -0.0413170 | 2.3004780 | 0.0000190 | C | 1.3357370 | -1.3268530 | 0.0000020 | H | -0.7311290 | -1.9404310 | 0.0000180 | C | 2.2171120 | -0.2394330 | -0.0000100 | H | 2.4125090 | 1.9061930 | -0.0000160 | H | 1.7249550 | -2.3387590 | 0.0000030 | H | 3.2875020 | -0.4140140 | -0.0000280 |
| N                                                                                                                                                                                                                                                                                                                                                                                                                                                                                                                                                                                                                                                                                                                                                                                                                                                                                                                                                                                                                                                                                                                                                                                                                                                                                                                                                                                                                                                                                                                                                                                                                                                                                                                                                                                                                                                                     | 0.1535660  | 2.1418480  | -0.1844330 |            |   |           |           |            |   |            |           |            |   |           |           |           |    |           |            |            |                                                                                                                                                                                                                                                                                                                                                                                                                                                                                                                                                                                                                                |           |           |            |            |           |            |            |            |           |            |           |            |            |           |            |            |            |            |           |   |            |           |           |   |            |           |           |   |            |            |            |   |            |            |            |   |            |           |           |   |            |           |           |   |            |            |           |   |            |            |            |   |            |            |            |   |           |            |            |                                                                                                                                                                                                                                                                                                                                                                                                                                                                                                                                                                                                                                                                                                                                                                                                                                                                                                                                                                                                                                                                                                                                                                                                                                                                                                                                                                                                  |   |            |           |           |   |            |            |            |   |            |           |            |   |            |           |           |   |           |           |           |   |            |            |           |   |           |           |            |   |            |           |           |   |           |            |           |   |            |            |           |   |           |            |            |   |           |           |            |   |           |            |           |   |           |            |            |
| C                                                                                                                                                                                                                                                                                                                                                                                                                                                                                                                                                                                                                                                                                                                                                                                                                                                                                                                                                                                                                                                                                                                                                                                                                                                                                                                                                                                                                                                                                                                                                                                                                                                                                                                                                                                                                                                                     | 0.9735200  | 0.9921690  | -0.8197530 |            |   |           |           |            |   |            |           |            |   |           |           |           |    |           |            |            |                                                                                                                                                                                                                                                                                                                                                                                                                                                                                                                                                                                                                                |           |           |            |            |           |            |            |            |           |            |           |            |            |           |            |            |            |            |           |   |            |           |           |   |            |           |           |   |            |            |            |   |            |            |            |   |            |           |           |   |            |           |           |   |            |            |           |   |            |            |            |   |            |            |            |   |           |            |            |                                                                                                                                                                                                                                                                                                                                                                                                                                                                                                                                                                                                                                                                                                                                                                                                                                                                                                                                                                                                                                                                                                                                                                                                                                                                                                                                                                                                  |   |            |           |           |   |            |            |            |   |            |           |            |   |            |           |           |   |           |           |           |   |            |            |           |   |           |           |            |   |            |           |           |   |           |            |           |   |            |            |           |   |           |            |            |   |           |           |            |   |           |            |           |   |           |            |            |
| C                                                                                                                                                                                                                                                                                                                                                                                                                                                                                                                                                                                                                                                                                                                                                                                                                                                                                                                                                                                                                                                                                                                                                                                                                                                                                                                                                                                                                                                                                                                                                                                                                                                                                                                                                                                                                                                                     | 2.0209370  | 0.3681980  | 0.0456220  |            |   |           |           |            |   |            |           |            |   |           |           |           |    |           |            |            |                                                                                                                                                                                                                                                                                                                                                                                                                                                                                                                                                                                                                                |           |           |            |            |           |            |            |            |           |            |           |            |            |           |            |            |            |            |           |   |            |           |           |   |            |           |           |   |            |            |            |   |            |            |            |   |            |           |           |   |            |           |           |   |            |            |           |   |            |            |            |   |            |            |            |   |           |            |            |                                                                                                                                                                                                                                                                                                                                                                                                                                                                                                                                                                                                                                                                                                                                                                                                                                                                                                                                                                                                                                                                                                                                                                                                                                                                                                                                                                                                  |   |            |           |           |   |            |            |            |   |            |           |            |   |            |           |           |   |           |           |           |   |            |            |           |   |           |           |            |   |            |           |           |   |           |            |           |   |            |            |           |   |           |            |            |   |           |           |            |   |           |            |           |   |           |            |            |
| O                                                                                                                                                                                                                                                                                                                                                                                                                                                                                                                                                                                                                                                                                                                                                                                                                                                                                                                                                                                                                                                                                                                                                                                                                                                                                                                                                                                                                                                                                                                                                                                                                                                                                                                                                                                                                                                                     | 1.9158670  | 0.3165810  | 1.2704370  |            |   |           |           |            |   |            |           |            |   |           |           |           |    |           |            |            |                                                                                                                                                                                                                                                                                                                                                                                                                                                                                                                                                                                                                                |           |           |            |            |           |            |            |            |           |            |           |            |            |           |            |            |            |            |           |   |            |           |           |   |            |           |           |   |            |            |            |   |            |            |            |   |            |           |           |   |            |           |           |   |            |            |           |   |            |            |            |   |            |            |            |   |           |            |            |                                                                                                                                                                                                                                                                                                                                                                                                                                                                                                                                                                                                                                                                                                                                                                                                                                                                                                                                                                                                                                                                                                                                                                                                                                                                                                                                                                                                  |   |            |           |           |   |            |            |            |   |            |           |            |   |            |           |           |   |           |           |           |   |            |            |           |   |           |           |            |   |            |           |           |   |           |            |           |   |            |            |           |   |           |            |            |   |           |           |            |   |           |            |           |   |           |            |            |
| C                                                                                                                                                                                                                                                                                                                                                                                                                                                                                                                                                                                                                                                                                                                                                                                                                                                                                                                                                                                                                                                                                                                                                                                                                                                                                                                                                                                                                                                                                                                                                                                                                                                                                                                                                                                                                                                                     | 3.1516100  | -0.1696720 | -0.6881320 |            |   |           |           |            |   |            |           |            |   |           |           |           |    |           |            |            |                                                                                                                                                                                                                                                                                                                                                                                                                                                                                                                                                                                                                                |           |           |            |            |           |            |            |            |           |            |           |            |            |           |            |            |            |            |           |   |            |           |           |   |            |           |           |   |            |            |            |   |            |            |            |   |            |           |           |   |            |           |           |   |            |            |           |   |            |            |            |   |            |            |            |   |           |            |            |                                                                                                                                                                                                                                                                                                                                                                                                                                                                                                                                                                                                                                                                                                                                                                                                                                                                                                                                                                                                                                                                                                                                                                                                                                                                                                                                                                                                  |   |            |           |           |   |            |            |            |   |            |           |            |   |            |           |           |   |           |           |           |   |            |            |           |   |           |           |            |   |            |           |           |   |           |            |           |   |            |            |           |   |           |            |            |   |           |           |            |   |           |            |           |   |           |            |            |
| H                                                                                                                                                                                                                                                                                                                                                                                                                                                                                                                                                                                                                                                                                                                                                                                                                                                                                                                                                                                                                                                                                                                                                                                                                                                                                                                                                                                                                                                                                                                                                                                                                                                                                                                                                                                                                                                                     | 1.1935240  | 1.0850710  | -1.8790840 |            |   |           |           |            |   |            |           |            |   |           |           |           |    |           |            |            |                                                                                                                                                                                                                                                                                                                                                                                                                                                                                                                                                                                                                                |           |           |            |            |           |            |            |            |           |            |           |            |            |           |            |            |            |            |           |   |            |           |           |   |            |           |           |   |            |            |            |   |            |            |            |   |            |           |           |   |            |           |           |   |            |            |           |   |            |            |            |   |            |            |            |   |           |            |            |                                                                                                                                                                                                                                                                                                                                                                                                                                                                                                                                                                                                                                                                                                                                                                                                                                                                                                                                                                                                                                                                                                                                                                                                                                                                                                                                                                                                  |   |            |           |           |   |            |            |            |   |            |           |            |   |            |           |           |   |           |           |           |   |            |            |           |   |           |           |            |   |            |           |           |   |           |            |           |   |            |            |           |   |           |            |            |   |           |           |            |   |           |            |           |   |           |            |            |
| N                                                                                                                                                                                                                                                                                                                                                                                                                                                                                                                                                                                                                                                                                                                                                                                                                                                                                                                                                                                                                                                                                                                                                                                                                                                                                                                                                                                                                                                                                                                                                                                                                                                                                                                                                                                                                                                                     | 4.0918420  | -0.7633600 | 0.0029620  |            |   |           |           |            |   |            |           |            |   |           |           |           |    |           |            |            |                                                                                                                                                                                                                                                                                                                                                                                                                                                                                                                                                                                                                                |           |           |            |            |           |            |            |            |           |            |           |            |            |           |            |            |            |            |           |   |            |           |           |   |            |           |           |   |            |            |            |   |            |            |            |   |            |           |           |   |            |           |           |   |            |            |           |   |            |            |            |   |            |            |            |   |           |            |            |                                                                                                                                                                                                                                                                                                                                                                                                                                                                                                                                                                                                                                                                                                                                                                                                                                                                                                                                                                                                                                                                                                                                                                                                                                                                                                                                                                                                  |   |            |           |           |   |            |            |            |   |            |           |            |   |            |           |           |   |           |           |           |   |            |            |           |   |           |           |            |   |            |           |           |   |           |            |           |   |            |            |           |   |           |            |            |   |           |           |            |   |           |            |           |   |           |            |            |
| N                                                                                                                                                                                                                                                                                                                                                                                                                                                                                                                                                                                                                                                                                                                                                                                                                                                                                                                                                                                                                                                                                                                                                                                                                                                                                                                                                                                                                                                                                                                                                                                                                                                                                                                                                                                                                                                                     | 4.8657780  | -1.2607050 | 0.6523620  |            |   |           |           |            |   |            |           |            |   |           |           |           |    |           |            |            |                                                                                                                                                                                                                                                                                                                                                                                                                                                                                                                                                                                                                                |           |           |            |            |           |            |            |            |           |            |           |            |            |           |            |            |            |            |           |   |            |           |           |   |            |           |           |   |            |            |            |   |            |            |            |   |            |           |           |   |            |           |           |   |            |            |           |   |            |            |            |   |            |            |            |   |           |            |            |                                                                                                                                                                                                                                                                                                                                                                                                                                                                                                                                                                                                                                                                                                                                                                                                                                                                                                                                                                                                                                                                                                                                                                                                                                                                                                                                                                                                  |   |            |           |           |   |            |            |            |   |            |           |            |   |            |           |           |   |           |           |           |   |            |            |           |   |           |           |            |   |            |           |           |   |           |            |           |   |            |            |           |   |           |            |            |   |           |           |            |   |           |            |           |   |           |            |            |
| C                                                                                                                                                                                                                                                                                                                                                                                                                                                                                                                                                                                                                                                                                                                                                                                                                                                                                                                                                                                                                                                                                                                                                                                                                                                                                                                                                                                                                                                                                                                                                                                                                                                                                                                                                                                                                                                                     | -1.6417980 | 0.3077180  | -0.1629270 |            |   |           |           |            |   |            |           |            |   |           |           |           |    |           |            |            |                                                                                                                                                                                                                                                                                                                                                                                                                                                                                                                                                                                                                                |           |           |            |            |           |            |            |            |           |            |           |            |            |           |            |            |            |            |           |   |            |           |           |   |            |           |           |   |            |            |            |   |            |            |            |   |            |           |           |   |            |           |           |   |            |            |           |   |            |            |            |   |            |            |            |   |           |            |            |                                                                                                                                                                                                                                                                                                                                                                                                                                                                                                                                                                                                                                                                                                                                                                                                                                                                                                                                                                                                                                                                                                                                                                                                                                                                                                                                                                                                  |   |            |           |           |   |            |            |            |   |            |           |            |   |            |           |           |   |           |           |           |   |            |            |           |   |           |           |            |   |            |           |           |   |           |            |           |   |            |            |           |   |           |            |            |   |           |           |            |   |           |            |           |   |           |            |            |
| C                                                                                                                                                                                                                                                                                                                                                                                                                                                                                                                                                                                                                                                                                                                                                                                                                                                                                                                                                                                                                                                                                                                                                                                                                                                                                                                                                                                                                                                                                                                                                                                                                                                                                                                                                                                                                                                                     | -4.0098760 | -1.1080900 | 0.1980380  |            |   |           |           |            |   |            |           |            |   |           |           |           |    |           |            |            |                                                                                                                                                                                                                                                                                                                                                                                                                                                                                                                                                                                                                                |           |           |            |            |           |            |            |            |           |            |           |            |            |           |            |            |            |            |           |   |            |           |           |   |            |           |           |   |            |            |            |   |            |            |            |   |            |           |           |   |            |           |           |   |            |            |           |   |            |            |            |   |            |            |            |   |           |            |            |                                                                                                                                                                                                                                                                                                                                                                                                                                                                                                                                                                                                                                                                                                                                                                                                                                                                                                                                                                                                                                                                                                                                                                                                                                                                                                                                                                                                  |   |            |           |           |   |            |            |            |   |            |           |            |   |            |           |           |   |           |           |           |   |            |            |           |   |           |           |            |   |            |           |           |   |           |            |           |   |            |            |           |   |           |            |            |   |           |           |            |   |           |            |           |   |           |            |            |
| C                                                                                                                                                                                                                                                                                                                                                                                                                                                                                                                                                                                                                                                                                                                                                                                                                                                                                                                                                                                                                                                                                                                                                                                                                                                                                                                                                                                                                                                                                                                                                                                                                                                                                                                                                                                                                                                                     | -3.9393120 | 0.2370610  | 0.5749300  |            |   |           |           |            |   |            |           |            |   |           |           |           |    |           |            |            |                                                                                                                                                                                                                                                                                                                                                                                                                                                                                                                                                                                                                                |           |           |            |            |           |            |            |            |           |            |           |            |            |           |            |            |            |            |           |   |            |           |           |   |            |           |           |   |            |            |            |   |            |            |            |   |            |           |           |   |            |           |           |   |            |            |           |   |            |            |            |   |            |            |            |   |           |            |            |                                                                                                                                                                                                                                                                                                                                                                                                                                                                                                                                                                                                                                                                                                                                                                                                                                                                                                                                                                                                                                                                                                                                                                                                                                                                                                                                                                                                  |   |            |           |           |   |            |            |            |   |            |           |            |   |            |           |           |   |           |           |           |   |            |            |           |   |           |           |            |   |            |           |           |   |           |            |           |   |            |            |           |   |           |            |            |   |           |           |            |   |           |            |           |   |           |            |            |
| C                                                                                                                                                                                                                                                                                                                                                                                                                                                                                                                                                                                                                                                                                                                                                                                                                                                                                                                                                                                                                                                                                                                                                                                                                                                                                                                                                                                                                                                                                                                                                                                                                                                                                                                                                                                                                                                                     | -2.7591680 | 0.9483820  | 0.3974260  |            |   |           |           |            |   |            |           |            |   |           |           |           |    |           |            |            |                                                                                                                                                                                                                                                                                                                                                                                                                                                                                                                                                                                                                                |           |           |            |            |           |            |            |            |           |            |           |            |            |           |            |            |            |            |           |   |            |           |           |   |            |           |           |   |            |            |            |   |            |            |            |   |            |           |           |   |            |           |           |   |            |            |           |   |            |            |            |   |            |            |            |   |           |            |            |                                                                                                                                                                                                                                                                                                                                                                                                                                                                                                                                                                                                                                                                                                                                                                                                                                                                                                                                                                                                                                                                                                                                                                                                                                                                                                                                                                                                  |   |            |           |           |   |            |            |            |   |            |           |            |   |            |           |           |   |           |           |           |   |            |            |           |   |           |           |            |   |            |           |           |   |           |            |           |   |            |            |           |   |           |            |            |   |           |           |            |   |           |            |           |   |           |            |            |
| C                                                                                                                                                                                                                                                                                                                                                                                                                                                                                                                                                                                                                                                                                                                                                                                                                                                                                                                                                                                                                                                                                                                                                                                                                                                                                                                                                                                                                                                                                                                                                                                                                                                                                                                                                                                                                                                                     | -1.7133860 | -1.0400940 | -0.5404890 |            |   |           |           |            |   |            |           |            |   |           |           |           |    |           |            |            |                                                                                                                                                                                                                                                                                                                                                                                                                                                                                                                                                                                                                                |           |           |            |            |           |            |            |            |           |            |           |            |            |           |            |            |            |            |           |   |            |           |           |   |            |           |           |   |            |            |            |   |            |            |            |   |            |           |           |   |            |           |           |   |            |            |           |   |            |            |            |   |            |            |            |   |           |            |            |                                                                                                                                                                                                                                                                                                                                                                                                                                                                                                                                                                                                                                                                                                                                                                                                                                                                                                                                                                                                                                                                                                                                                                                                                                                                                                                                                                                                  |   |            |           |           |   |            |            |            |   |            |           |            |   |            |           |           |   |           |           |           |   |            |            |           |   |           |           |            |   |            |           |           |   |           |            |           |   |            |            |           |   |           |            |            |   |           |           |            |   |           |            |           |   |           |            |            |
| C                                                                                                                                                                                                                                                                                                                                                                                                                                                                                                                                                                                                                                                                                                                                                                                                                                                                                                                                                                                                                                                                                                                                                                                                                                                                                                                                                                                                                                                                                                                                                                                                                                                                                                                                                                                                                                                                     | -2.8995550 | -1.7454090 | -0.3581770 |            |   |           |           |            |   |            |           |            |   |           |           |           |    |           |            |            |                                                                                                                                                                                                                                                                                                                                                                                                                                                                                                                                                                                                                                |           |           |            |            |           |            |            |            |           |            |           |            |            |           |            |            |            |            |           |   |            |           |           |   |            |           |           |   |            |            |            |   |            |            |            |   |            |           |           |   |            |           |           |   |            |            |           |   |            |            |            |   |            |            |            |   |           |            |            |                                                                                                                                                                                                                                                                                                                                                                                                                                                                                                                                                                                                                                                                                                                                                                                                                                                                                                                                                                                                                                                                                                                                                                                                                                                                                                                                                                                                  |   |            |           |           |   |            |            |            |   |            |           |            |   |            |           |           |   |           |           |           |   |            |            |           |   |           |           |            |   |            |           |           |   |           |            |           |   |            |            |           |   |           |            |            |   |           |           |            |   |           |            |           |   |           |            |            |
| H                                                                                                                                                                                                                                                                                                                                                                                                                                                                                                                                                                                                                                                                                                                                                                                                                                                                                                                                                                                                                                                                                                                                                                                                                                                                                                                                                                                                                                                                                                                                                                                                                                                                                                                                                                                                                                                                     | -2.6921570 | 1.9910400  | 0.6865610  |            |   |           |           |            |   |            |           |            |   |           |           |           |    |           |            |            |                                                                                                                                                                                                                                                                                                                                                                                                                                                                                                                                                                                                                                |           |           |            |            |           |            |            |            |           |            |           |            |            |           |            |            |            |            |           |   |            |           |           |   |            |           |           |   |            |            |            |   |            |            |            |   |            |           |           |   |            |           |           |   |            |            |           |   |            |            |            |   |            |            |            |   |           |            |            |                                                                                                                                                                                                                                                                                                                                                                                                                                                                                                                                                                                                                                                                                                                                                                                                                                                                                                                                                                                                                                                                                                                                                                                                                                                                                                                                                                                                  |   |            |           |           |   |            |            |            |   |            |           |            |   |            |           |           |   |           |           |           |   |            |            |           |   |           |           |            |   |            |           |           |   |           |            |           |   |            |            |           |   |           |            |            |   |           |           |            |   |           |            |           |   |           |            |            |
| H                                                                                                                                                                                                                                                                                                                                                                                                                                                                                                                                                                                                                                                                                                                                                                                                                                                                                                                                                                                                                                                                                                                                                                                                                                                                                                                                                                                                                                                                                                                                                                                                                                                                                                                                                                                                                                                                     | -4.8051420 | 0.7256760  | 1.0067890  |            |   |           |           |            |   |            |           |            |   |           |           |           |    |           |            |            |                                                                                                                                                                                                                                                                                                                                                                                                                                                                                                                                                                                                                                |           |           |            |            |           |            |            |            |           |            |           |            |            |           |            |            |            |            |           |   |            |           |           |   |            |           |           |   |            |            |            |   |            |            |            |   |            |           |           |   |            |           |           |   |            |            |           |   |            |            |            |   |            |            |            |   |           |            |            |                                                                                                                                                                                                                                                                                                                                                                                                                                                                                                                                                                                                                                                                                                                                                                                                                                                                                                                                                                                                                                                                                                                                                                                                                                                                                                                                                                                                  |   |            |           |           |   |            |            |            |   |            |           |            |   |            |           |           |   |           |           |           |   |            |            |           |   |           |           |            |   |            |           |           |   |           |            |           |   |            |            |           |   |           |            |            |   |           |           |            |   |           |            |           |   |           |            |            |
| H                                                                                                                                                                                                                                                                                                                                                                                                                                                                                                                                                                                                                                                                                                                                                                                                                                                                                                                                                                                                                                                                                                                                                                                                                                                                                                                                                                                                                                                                                                                                                                                                                                                                                                                                                                                                                                                                     | -4.9332110 | -1.6587220 | 0.3395890  |            |   |           |           |            |   |            |           |            |   |           |           |           |    |           |            |            |                                                                                                                                                                                                                                                                                                                                                                                                                                                                                                                                                                                                                                |           |           |            |            |           |            |            |            |           |            |           |            |            |           |            |            |            |            |           |   |            |           |           |   |            |           |           |   |            |            |            |   |            |            |            |   |            |           |           |   |            |           |           |   |            |            |           |   |            |            |            |   |            |            |            |   |           |            |            |                                                                                                                                                                                                                                                                                                                                                                                                                                                                                                                                                                                                                                                                                                                                                                                                                                                                                                                                                                                                                                                                                                                                                                                                                                                                                                                                                                                                  |   |            |           |           |   |            |            |            |   |            |           |            |   |            |           |           |   |           |           |           |   |            |            |           |   |           |           |            |   |            |           |           |   |           |            |           |   |            |            |           |   |           |            |            |   |           |           |            |   |           |            |           |   |           |            |            |
| H                                                                                                                                                                                                                                                                                                                                                                                                                                                                                                                                                                                                                                                                                                                                                                                                                                                                                                                                                                                                                                                                                                                                                                                                                                                                                                                                                                                                                                                                                                                                                                                                                                                                                                                                                                                                                                                                     | -2.9588640 | -2.7881400 | -0.6477480 |            |   |           |           |            |   |            |           |            |   |           |           |           |    |           |            |            |                                                                                                                                                                                                                                                                                                                                                                                                                                                                                                                                                                                                                                |           |           |            |            |           |            |            |            |           |            |           |            |            |           |            |            |            |            |           |   |            |           |           |   |            |           |           |   |            |            |            |   |            |            |            |   |            |           |           |   |            |           |           |   |            |            |           |   |            |            |            |   |            |            |            |   |           |            |            |                                                                                                                                                                                                                                                                                                                                                                                                                                                                                                                                                                                                                                                                                                                                                                                                                                                                                                                                                                                                                                                                                                                                                                                                                                                                                                                                                                                                  |   |            |           |           |   |            |            |            |   |            |           |            |   |            |           |           |   |           |           |           |   |            |            |           |   |           |           |            |   |            |           |           |   |           |            |           |   |            |            |           |   |           |            |            |   |           |           |            |   |           |            |           |   |           |            |            |
| H                                                                                                                                                                                                                                                                                                                                                                                                                                                                                                                                                                                                                                                                                                                                                                                                                                                                                                                                                                                                                                                                                                                                                                                                                                                                                                                                                                                                                                                                                                                                                                                                                                                                                                                                                                                                                                                                     | -0.8422100 | -1.5215900 | -0.9699940 |            |   |           |           |            |   |            |           |            |   |           |           |           |    |           |            |            |                                                                                                                                                                                                                                                                                                                                                                                                                                                                                                                                                                                                                                |           |           |            |            |           |            |            |            |           |            |           |            |            |           |            |            |            |            |           |   |            |           |           |   |            |           |           |   |            |            |            |   |            |            |            |   |            |           |           |   |            |           |           |   |            |            |           |   |            |            |            |   |            |            |            |   |           |            |            |                                                                                                                                                                                                                                                                                                                                                                                                                                                                                                                                                                                                                                                                                                                                                                                                                                                                                                                                                                                                                                                                                                                                                                                                                                                                                                                                                                                                  |   |            |           |           |   |            |            |            |   |            |           |            |   |            |           |           |   |           |           |           |   |            |            |           |   |           |           |            |   |            |           |           |   |           |            |           |   |            |            |           |   |           |            |            |   |           |           |            |   |           |            |           |   |           |            |            |
| H                                                                                                                                                                                                                                                                                                                                                                                                                                                                                                                                                                                                                                                                                                                                                                                                                                                                                                                                                                                                                                                                                                                                                                                                                                                                                                                                                                                                                                                                                                                                                                                                                                                                                                                                                                                                                                                                     | 3.2893650  | -0.1254190 | -1.7588600 |            |   |           |           |            |   |            |           |            |   |           |           |           |    |           |            |            |                                                                                                                                                                                                                                                                                                                                                                                                                                                                                                                                                                                                                                |           |           |            |            |           |            |            |            |           |            |           |            |            |           |            |            |            |            |           |   |            |           |           |   |            |           |           |   |            |            |            |   |            |            |            |   |            |           |           |   |            |           |           |   |            |            |           |   |            |            |            |   |            |            |            |   |           |            |            |                                                                                                                                                                                                                                                                                                                                                                                                                                                                                                                                                                                                                                                                                                                                                                                                                                                                                                                                                                                                                                                                                                                                                                                                                                                                                                                                                                                                  |   |            |           |           |   |            |            |            |   |            |           |            |   |            |           |           |   |           |           |           |   |            |            |           |   |           |           |            |   |            |           |           |   |           |            |           |   |            |            |           |   |           |            |            |   |           |           |            |   |           |            |           |   |           |            |            |
| C                                                                                                                                                                                                                                                                                                                                                                                                                                                                                                                                                                                                                                                                                                                                                                                                                                                                                                                                                                                                                                                                                                                                                                                                                                                                                                                                                                                                                                                                                                                                                                                                                                                                                                                                                                                                                                                                     | -1.9874290 | 0.4657850  | 0.0000220  |            |   |           |           |            |   |            |           |            |   |           |           |           |    |           |            |            |                                                                                                                                                                                                                                                                                                                                                                                                                                                                                                                                                                                                                                |           |           |            |            |           |            |            |            |           |            |           |            |            |           |            |            |            |            |           |   |            |           |           |   |            |           |           |   |            |            |            |   |            |            |            |   |            |           |           |   |            |           |           |   |            |            |           |   |            |            |            |   |            |            |            |   |           |            |            |                                                                                                                                                                                                                                                                                                                                                                                                                                                                                                                                                                                                                                                                                                                                                                                                                                                                                                                                                                                                                                                                                                                                                                                                                                                                                                                                                                                                  |   |            |           |           |   |            |            |            |   |            |           |            |   |            |           |           |   |           |           |           |   |            |            |           |   |           |           |            |   |            |           |           |   |           |            |           |   |            |            |           |   |           |            |            |   |           |           |            |   |           |            |           |   |           |            |            |
| O                                                                                                                                                                                                                                                                                                                                                                                                                                                                                                                                                                                                                                                                                                                                                                                                                                                                                                                                                                                                                                                                                                                                                                                                                                                                                                                                                                                                                                                                                                                                                                                                                                                                                                                                                                                                                                                                     | -2.8519050 | -0.3934010 | -0.0000230 |            |   |           |           |            |   |            |           |            |   |           |           |           |    |           |            |            |                                                                                                                                                                                                                                                                                                                                                                                                                                                                                                                                                                                                                                |           |           |            |            |           |            |            |            |           |            |           |            |            |           |            |            |            |            |           |   |            |           |           |   |            |           |           |   |            |            |            |   |            |            |            |   |            |           |           |   |            |           |           |   |            |            |           |   |            |            |            |   |            |            |            |   |           |            |            |                                                                                                                                                                                                                                                                                                                                                                                                                                                                                                                                                                                                                                                                                                                                                                                                                                                                                                                                                                                                                                                                                                                                                                                                                                                                                                                                                                                                  |   |            |           |           |   |            |            |            |   |            |           |            |   |            |           |           |   |           |           |           |   |            |            |           |   |           |           |            |   |            |           |           |   |           |            |           |   |            |            |           |   |           |            |            |   |           |           |            |   |           |            |           |   |           |            |            |
| H                                                                                                                                                                                                                                                                                                                                                                                                                                                                                                                                                                                                                                                                                                                                                                                                                                                                                                                                                                                                                                                                                                                                                                                                                                                                                                                                                                                                                                                                                                                                                                                                                                                                                                                                                                                                                                                                     | -2.2644570 | 1.5376200  | -0.0000510 |            |   |           |           |            |   |            |           |            |   |           |           |           |    |           |            |            |                                                                                                                                                                                                                                                                                                                                                                                                                                                                                                                                                                                                                                |           |           |            |            |           |            |            |            |           |            |           |            |            |           |            |            |            |            |           |   |            |           |           |   |            |           |           |   |            |            |            |   |            |            |            |   |            |           |           |   |            |           |           |   |            |            |           |   |            |            |            |   |            |            |            |   |           |            |            |                                                                                                                                                                                                                                                                                                                                                                                                                                                                                                                                                                                                                                                                                                                                                                                                                                                                                                                                                                                                                                                                                                                                                                                                                                                                                                                                                                                                  |   |            |           |           |   |            |            |            |   |            |           |            |   |            |           |           |   |           |           |           |   |            |            |           |   |           |           |            |   |            |           |           |   |           |            |           |   |            |            |           |   |           |            |            |   |           |           |            |   |           |            |           |   |           |            |            |
| C                                                                                                                                                                                                                                                                                                                                                                                                                                                                                                                                                                                                                                                                                                                                                                                                                                                                                                                                                                                                                                                                                                                                                                                                                                                                                                                                                                                                                                                                                                                                                                                                                                                                                                                                                                                                                                                                     | -0.5355200 | 0.2031200  | 0.0000150  |            |   |           |           |            |   |            |           |            |   |           |           |           |    |           |            |            |                                                                                                                                                                                                                                                                                                                                                                                                                                                                                                                                                                                                                                |           |           |            |            |           |            |            |            |           |            |           |            |            |           |            |            |            |            |           |   |            |           |           |   |            |           |           |   |            |            |            |   |            |            |            |   |            |           |           |   |            |           |           |   |            |            |           |   |            |            |            |   |            |            |            |   |           |            |            |                                                                                                                                                                                                                                                                                                                                                                                                                                                                                                                                                                                                                                                                                                                                                                                                                                                                                                                                                                                                                                                                                                                                                                                                                                                                                                                                                                                                  |   |            |           |           |   |            |            |            |   |            |           |            |   |            |           |           |   |           |           |           |   |            |            |           |   |           |           |            |   |            |           |           |   |           |            |           |   |            |            |           |   |           |            |            |   |           |           |            |   |           |            |           |   |           |            |            |
| C                                                                                                                                                                                                                                                                                                                                                                                                                                                                                                                                                                                                                                                                                                                                                                                                                                                                                                                                                                                                                                                                                                                                                                                                                                                                                                                                                                                                                                                                                                                                                                                                                                                                                                                                                                                                                                                                     | 0.3510190  | 1.2883970  | 0.0000100  |            |   |           |           |            |   |            |           |            |   |           |           |           |    |           |            |            |                                                                                                                                                                                                                                                                                                                                                                                                                                                                                                                                                                                                                                |           |           |            |            |           |            |            |            |           |            |           |            |            |           |            |            |            |            |           |   |            |           |           |   |            |           |           |   |            |            |            |   |            |            |            |   |            |           |           |   |            |           |           |   |            |            |           |   |            |            |            |   |            |            |            |   |           |            |            |                                                                                                                                                                                                                                                                                                                                                                                                                                                                                                                                                                                                                                                                                                                                                                                                                                                                                                                                                                                                                                                                                                                                                                                                                                                                                                                                                                                                  |   |            |           |           |   |            |            |            |   |            |           |            |   |            |           |           |   |           |           |           |   |            |            |           |   |           |           |            |   |            |           |           |   |           |            |           |   |            |            |           |   |           |            |            |   |           |           |            |   |           |            |           |   |           |            |            |
| C                                                                                                                                                                                                                                                                                                                                                                                                                                                                                                                                                                                                                                                                                                                                                                                                                                                                                                                                                                                                                                                                                                                                                                                                                                                                                                                                                                                                                                                                                                                                                                                                                                                                                                                                                                                                                                                                     | -0.0361400 | -1.1085550 | 0.0000110  |            |   |           |           |            |   |            |           |            |   |           |           |           |    |           |            |            |                                                                                                                                                                                                                                                                                                                                                                                                                                                                                                                                                                                                                                |           |           |            |            |           |            |            |            |           |            |           |            |            |           |            |            |            |            |           |   |            |           |           |   |            |           |           |   |            |            |            |   |            |            |            |   |            |           |           |   |            |           |           |   |            |            |           |   |            |            |            |   |            |            |            |   |           |            |            |                                                                                                                                                                                                                                                                                                                                                                                                                                                                                                                                                                                                                                                                                                                                                                                                                                                                                                                                                                                                                                                                                                                                                                                                                                                                                                                                                                                                  |   |            |           |           |   |            |            |            |   |            |           |            |   |            |           |           |   |           |           |           |   |            |            |           |   |           |           |            |   |            |           |           |   |           |            |           |   |            |            |           |   |           |            |            |   |           |           |            |   |           |            |           |   |           |            |            |
| C                                                                                                                                                                                                                                                                                                                                                                                                                                                                                                                                                                                                                                                                                                                                                                                                                                                                                                                                                                                                                                                                                                                                                                                                                                                                                                                                                                                                                                                                                                                                                                                                                                                                                                                                                                                                                                                                     | 1.7264170  | 1.0668920  | -0.0000090 |            |   |           |           |            |   |            |           |            |   |           |           |           |    |           |            |            |                                                                                                                                                                                                                                                                                                                                                                                                                                                                                                                                                                                                                                |           |           |            |            |           |            |            |            |           |            |           |            |            |           |            |            |            |            |           |   |            |           |           |   |            |           |           |   |            |            |            |   |            |            |            |   |            |           |           |   |            |           |           |   |            |            |           |   |            |            |            |   |            |            |            |   |           |            |            |                                                                                                                                                                                                                                                                                                                                                                                                                                                                                                                                                                                                                                                                                                                                                                                                                                                                                                                                                                                                                                                                                                                                                                                                                                                                                                                                                                                                  |   |            |           |           |   |            |            |            |   |            |           |            |   |            |           |           |   |           |           |           |   |            |            |           |   |           |           |            |   |            |           |           |   |           |            |           |   |            |            |           |   |           |            |            |   |           |           |            |   |           |            |           |   |           |            |            |
| H                                                                                                                                                                                                                                                                                                                                                                                                                                                                                                                                                                                                                                                                                                                                                                                                                                                                                                                                                                                                                                                                                                                                                                                                                                                                                                                                                                                                                                                                                                                                                                                                                                                                                                                                                                                                                                                                     | -0.0413170 | 2.3004780  | 0.0000190  |            |   |           |           |            |   |            |           |            |   |           |           |           |    |           |            |            |                                                                                                                                                                                                                                                                                                                                                                                                                                                                                                                                                                                                                                |           |           |            |            |           |            |            |            |           |            |           |            |            |           |            |            |            |            |           |   |            |           |           |   |            |           |           |   |            |            |            |   |            |            |            |   |            |           |           |   |            |           |           |   |            |            |           |   |            |            |            |   |            |            |            |   |           |            |            |                                                                                                                                                                                                                                                                                                                                                                                                                                                                                                                                                                                                                                                                                                                                                                                                                                                                                                                                                                                                                                                                                                                                                                                                                                                                                                                                                                                                  |   |            |           |           |   |            |            |            |   |            |           |            |   |            |           |           |   |           |           |           |   |            |            |           |   |           |           |            |   |            |           |           |   |           |            |           |   |            |            |           |   |           |            |            |   |           |           |            |   |           |            |           |   |           |            |            |
| C                                                                                                                                                                                                                                                                                                                                                                                                                                                                                                                                                                                                                                                                                                                                                                                                                                                                                                                                                                                                                                                                                                                                                                                                                                                                                                                                                                                                                                                                                                                                                                                                                                                                                                                                                                                                                                                                     | 1.3357370  | -1.3268530 | 0.0000020  |            |   |           |           |            |   |            |           |            |   |           |           |           |    |           |            |            |                                                                                                                                                                                                                                                                                                                                                                                                                                                                                                                                                                                                                                |           |           |            |            |           |            |            |            |           |            |           |            |            |           |            |            |            |            |           |   |            |           |           |   |            |           |           |   |            |            |            |   |            |            |            |   |            |           |           |   |            |           |           |   |            |            |           |   |            |            |            |   |            |            |            |   |           |            |            |                                                                                                                                                                                                                                                                                                                                                                                                                                                                                                                                                                                                                                                                                                                                                                                                                                                                                                                                                                                                                                                                                                                                                                                                                                                                                                                                                                                                  |   |            |           |           |   |            |            |            |   |            |           |            |   |            |           |           |   |           |           |           |   |            |            |           |   |           |           |            |   |            |           |           |   |           |            |           |   |            |            |           |   |           |            |            |   |           |           |            |   |           |            |           |   |           |            |            |
| H                                                                                                                                                                                                                                                                                                                                                                                                                                                                                                                                                                                                                                                                                                                                                                                                                                                                                                                                                                                                                                                                                                                                                                                                                                                                                                                                                                                                                                                                                                                                                                                                                                                                                                                                                                                                                                                                     | -0.7311290 | -1.9404310 | 0.0000180  |            |   |           |           |            |   |            |           |            |   |           |           |           |    |           |            |            |                                                                                                                                                                                                                                                                                                                                                                                                                                                                                                                                                                                                                                |           |           |            |            |           |            |            |            |           |            |           |            |            |           |            |            |            |            |           |   |            |           |           |   |            |           |           |   |            |            |            |   |            |            |            |   |            |           |           |   |            |           |           |   |            |            |           |   |            |            |            |   |            |            |            |   |           |            |            |                                                                                                                                                                                                                                                                                                                                                                                                                                                                                                                                                                                                                                                                                                                                                                                                                                                                                                                                                                                                                                                                                                                                                                                                                                                                                                                                                                                                  |   |            |           |           |   |            |            |            |   |            |           |            |   |            |           |           |   |           |           |           |   |            |            |           |   |           |           |            |   |            |           |           |   |           |            |           |   |            |            |           |   |           |            |            |   |           |           |            |   |           |            |           |   |           |            |            |
| C                                                                                                                                                                                                                                                                                                                                                                                                                                                                                                                                                                                                                                                                                                                                                                                                                                                                                                                                                                                                                                                                                                                                                                                                                                                                                                                                                                                                                                                                                                                                                                                                                                                                                                                                                                                                                                                                     | 2.2171120  | -0.2394330 | -0.0000100 |            |   |           |           |            |   |            |           |            |   |           |           |           |    |           |            |            |                                                                                                                                                                                                                                                                                                                                                                                                                                                                                                                                                                                                                                |           |           |            |            |           |            |            |            |           |            |           |            |            |           |            |            |            |            |           |   |            |           |           |   |            |           |           |   |            |            |            |   |            |            |            |   |            |           |           |   |            |           |           |   |            |            |           |   |            |            |            |   |            |            |            |   |           |            |            |                                                                                                                                                                                                                                                                                                                                                                                                                                                                                                                                                                                                                                                                                                                                                                                                                                                                                                                                                                                                                                                                                                                                                                                                                                                                                                                                                                                                  |   |            |           |           |   |            |            |            |   |            |           |            |   |            |           |           |   |           |           |           |   |            |            |           |   |           |           |            |   |            |           |           |   |           |            |           |   |            |            |           |   |           |            |            |   |           |           |            |   |           |            |           |   |           |            |            |
| H                                                                                                                                                                                                                                                                                                                                                                                                                                                                                                                                                                                                                                                                                                                                                                                                                                                                                                                                                                                                                                                                                                                                                                                                                                                                                                                                                                                                                                                                                                                                                                                                                                                                                                                                                                                                                                                                     | 2.4125090  | 1.9061930  | -0.0000160 |            |   |           |           |            |   |            |           |            |   |           |           |           |    |           |            |            |                                                                                                                                                                                                                                                                                                                                                                                                                                                                                                                                                                                                                                |           |           |            |            |           |            |            |            |           |            |           |            |            |           |            |            |            |            |           |   |            |           |           |   |            |           |           |   |            |            |            |   |            |            |            |   |            |           |           |   |            |           |           |   |            |            |           |   |            |            |            |   |            |            |            |   |           |            |            |                                                                                                                                                                                                                                                                                                                                                                                                                                                                                                                                                                                                                                                                                                                                                                                                                                                                                                                                                                                                                                                                                                                                                                                                                                                                                                                                                                                                  |   |            |           |           |   |            |            |            |   |            |           |            |   |            |           |           |   |           |           |           |   |            |            |           |   |           |           |            |   |            |           |           |   |           |            |           |   |            |            |           |   |           |            |            |   |           |           |            |   |           |            |           |   |           |            |            |
| H                                                                                                                                                                                                                                                                                                                                                                                                                                                                                                                                                                                                                                                                                                                                                                                                                                                                                                                                                                                                                                                                                                                                                                                                                                                                                                                                                                                                                                                                                                                                                                                                                                                                                                                                                                                                                                                                     | 1.7249550  | -2.3387590 | 0.0000030  |            |   |           |           |            |   |            |           |            |   |           |           |           |    |           |            |            |                                                                                                                                                                                                                                                                                                                                                                                                                                                                                                                                                                                                                                |           |           |            |            |           |            |            |            |           |            |           |            |            |           |            |            |            |            |           |   |            |           |           |   |            |           |           |   |            |            |            |   |            |            |            |   |            |           |           |   |            |           |           |   |            |            |           |   |            |            |            |   |            |            |            |   |           |            |            |                                                                                                                                                                                                                                                                                                                                                                                                                                                                                                                                                                                                                                                                                                                                                                                                                                                                                                                                                                                                                                                                                                                                                                                                                                                                                                                                                                                                  |   |            |           |           |   |            |            |            |   |            |           |            |   |            |           |           |   |           |           |           |   |            |            |           |   |           |           |            |   |            |           |           |   |           |            |           |   |            |            |           |   |           |            |            |   |           |           |            |   |           |            |           |   |           |            |            |
| H                                                                                                                                                                                                                                                                                                                                                                                                                                                                                                                                                                                                                                                                                                                                                                                                                                                                                                                                                                                                                                                                                                                                                                                                                                                                                                                                                                                                                                                                                                                                                                                                                                                                                                                                                                                                                                                                     | 3.2875020  | -0.4140140 | -0.0000280 |            |   |           |           |            |   |            |           |            |   |           |           |           |    |           |            |            |                                                                                                                                                                                                                                                                                                                                                                                                                                                                                                                                                                                                                                |           |           |            |            |           |            |            |            |           |            |           |            |            |           |            |            |            |            |           |   |            |           |           |   |            |           |           |   |            |            |            |   |            |            |            |   |            |           |           |   |            |           |           |   |            |            |           |   |            |            |            |   |            |            |            |   |           |            |            |                                                                                                                                                                                                                                                                                                                                                                                                                                                                                                                                                                                                                                                                                                                                                                                                                                                                                                                                                                                                                                                                                                                                                                                                                                                                                                                                                                                                  |   |            |           |           |   |            |            |            |   |            |           |            |   |            |           |           |   |           |           |           |   |            |            |           |   |           |           |            |   |            |           |           |   |           |            |           |   |            |            |           |   |           |            |            |   |           |           |            |   |           |            |           |   |           |            |            |
| <p><b>Molecule Cs<sub>2</sub>CO<sub>3</sub></b></p>  <p>E = -303.846118, H (0K) = -303.831580,<br/>H (298K) = -303.822719,<br/>G (298K) = -303.872026 au.<br/>Imaginary frequency = 0.</p> <table border="1"> <tbody> <tr><td>C</td><td>0.0006250</td><td>1.4733050</td><td>-0.0006650</td></tr> <tr><td>O</td><td>0.0006330</td><td>0.1663930</td><td>-0.0030430</td></tr> <tr><td>O</td><td>-1.1249490</td><td>2.1122580</td><td>-0.0827030</td></tr> <tr><td>O</td><td>1.1263550</td><td>2.1119340</td><td>0.0837690</td></tr> <tr><td>Cs</td><td>3.1475850</td><td>-0.3997790</td><td>-0.0041490</td></tr> </tbody> </table>                                                                                                                                                                                                                                                                                                                                                                                                                                                                                                                                                                                                                                                                                                                                                                                                                                                                                                                                                                                                                                                                                                                                                   | C          | 0.0006250  | 1.4733050  | -0.0006650 | O | 0.0006330 | 0.1663930 | -0.0030430 | O | -1.1249490 | 2.1122580 | -0.0827030 | O | 1.1263550 | 2.1119340 | 0.0837690 | Cs | 3.1475850 | -0.3997790 | -0.0041490 | <p><b>Molecule CsHCO<sub>3</sub></b></p>  <p>E = -284.502506, H (0K) = -284.476132,<br/>H (298K) = -284.469202,<br/>G (298K) = -284.510013 au.<br/>Imaginary frequency = 0.</p> <table border="1"> <tbody> <tr><td>C</td><td>2.3080950</td><td>0.0330890</td><td>-0.0002350</td></tr> <tr><td>O</td><td>1.7948570</td><td>-1.1099260</td><td>-0.0001710</td></tr> <tr><td>O</td><td>1.7602120</td><td>1.1504770</td><td>-0.0000570</td></tr> <tr><td>O</td><td>3.7175950</td><td>0.0761650</td><td>-0.0003980</td></tr> </tbody> </table> | C         | 2.3080950 | 0.0330890  | -0.0002350 | O         | 1.7948570  | -1.1099260 | -0.0001710 | O         | 1.7602120  | 1.1504770 | -0.0000570 | O          | 3.7175950 | 0.0761650  | -0.0003980 |            |            |           |   |            |           |           |   |            |           |           |   |            |            |            |   |            |            |            |   |            |           |           |   |            |           |           |   |            |            |           |   |            |            |            |   |            |            |            |   |           |            |            |                                                                                                                                                                                                                                                                                                                                                                                                                                                                                                                                                                                                                                                                                                                                                                                                                                                                                                                                                                                                                                                                                                                                                                                                                                                                                                                                                                                                  |   |            |           |           |   |            |            |            |   |            |           |            |   |            |           |           |   |           |           |           |   |            |            |           |   |           |           |            |   |            |           |           |   |           |            |           |   |            |            |           |   |           |            |            |   |           |           |            |   |           |            |           |   |           |            |            |
| C                                                                                                                                                                                                                                                                                                                                                                                                                                                                                                                                                                                                                                                                                                                                                                                                                                                                                                                                                                                                                                                                                                                                                                                                                                                                                                                                                                                                                                                                                                                                                                                                                                                                                                                                                                                                                                                                     | 0.0006250  | 1.4733050  | -0.0006650 |            |   |           |           |            |   |            |           |            |   |           |           |           |    |           |            |            |                                                                                                                                                                                                                                                                                                                                                                                                                                                                                                                                                                                                                                |           |           |            |            |           |            |            |            |           |            |           |            |            |           |            |            |            |            |           |   |            |           |           |   |            |           |           |   |            |            |            |   |            |            |            |   |            |           |           |   |            |           |           |   |            |            |           |   |            |            |            |   |            |            |            |   |           |            |            |                                                                                                                                                                                                                                                                                                                                                                                                                                                                                                                                                                                                                                                                                                                                                                                                                                                                                                                                                                                                                                                                                                                                                                                                                                                                                                                                                                                                  |   |            |           |           |   |            |            |            |   |            |           |            |   |            |           |           |   |           |           |           |   |            |            |           |   |           |           |            |   |            |           |           |   |           |            |           |   |            |            |           |   |           |            |            |   |           |           |            |   |           |            |           |   |           |            |            |
| O                                                                                                                                                                                                                                                                                                                                                                                                                                                                                                                                                                                                                                                                                                                                                                                                                                                                                                                                                                                                                                                                                                                                                                                                                                                                                                                                                                                                                                                                                                                                                                                                                                                                                                                                                                                                                                                                     | 0.0006330  | 0.1663930  | -0.0030430 |            |   |           |           |            |   |            |           |            |   |           |           |           |    |           |            |            |                                                                                                                                                                                                                                                                                                                                                                                                                                                                                                                                                                                                                                |           |           |            |            |           |            |            |            |           |            |           |            |            |           |            |            |            |            |           |   |            |           |           |   |            |           |           |   |            |            |            |   |            |            |            |   |            |           |           |   |            |           |           |   |            |            |           |   |            |            |            |   |            |            |            |   |           |            |            |                                                                                                                                                                                                                                                                                                                                                                                                                                                                                                                                                                                                                                                                                                                                                                                                                                                                                                                                                                                                                                                                                                                                                                                                                                                                                                                                                                                                  |   |            |           |           |   |            |            |            |   |            |           |            |   |            |           |           |   |           |           |           |   |            |            |           |   |           |           |            |   |            |           |           |   |           |            |           |   |            |            |           |   |           |            |            |   |           |           |            |   |           |            |           |   |           |            |            |
| O                                                                                                                                                                                                                                                                                                                                                                                                                                                                                                                                                                                                                                                                                                                                                                                                                                                                                                                                                                                                                                                                                                                                                                                                                                                                                                                                                                                                                                                                                                                                                                                                                                                                                                                                                                                                                                                                     | -1.1249490 | 2.1122580  | -0.0827030 |            |   |           |           |            |   |            |           |            |   |           |           |           |    |           |            |            |                                                                                                                                                                                                                                                                                                                                                                                                                                                                                                                                                                                                                                |           |           |            |            |           |            |            |            |           |            |           |            |            |           |            |            |            |            |           |   |            |           |           |   |            |           |           |   |            |            |            |   |            |            |            |   |            |           |           |   |            |           |           |   |            |            |           |   |            |            |            |   |            |            |            |   |           |            |            |                                                                                                                                                                                                                                                                                                                                                                                                                                                                                                                                                                                                                                                                                                                                                                                                                                                                                                                                                                                                                                                                                                                                                                                                                                                                                                                                                                                                  |   |            |           |           |   |            |            |            |   |            |           |            |   |            |           |           |   |           |           |           |   |            |            |           |   |           |           |            |   |            |           |           |   |           |            |           |   |            |            |           |   |           |            |            |   |           |           |            |   |           |            |           |   |           |            |            |
| O                                                                                                                                                                                                                                                                                                                                                                                                                                                                                                                                                                                                                                                                                                                                                                                                                                                                                                                                                                                                                                                                                                                                                                                                                                                                                                                                                                                                                                                                                                                                                                                                                                                                                                                                                                                                                                                                     | 1.1263550  | 2.1119340  | 0.0837690  |            |   |           |           |            |   |            |           |            |   |           |           |           |    |           |            |            |                                                                                                                                                                                                                                                                                                                                                                                                                                                                                                                                                                                                                                |           |           |            |            |           |            |            |            |           |            |           |            |            |           |            |            |            |            |           |   |            |           |           |   |            |           |           |   |            |            |            |   |            |            |            |   |            |           |           |   |            |           |           |   |            |            |           |   |            |            |            |   |            |            |            |   |           |            |            |                                                                                                                                                                                                                                                                                                                                                                                                                                                                                                                                                                                                                                                                                                                                                                                                                                                                                                                                                                                                                                                                                                                                                                                                                                                                                                                                                                                                  |   |            |           |           |   |            |            |            |   |            |           |            |   |            |           |           |   |           |           |           |   |            |            |           |   |           |           |            |   |            |           |           |   |           |            |           |   |            |            |           |   |           |            |            |   |           |           |            |   |           |            |           |   |           |            |            |
| Cs                                                                                                                                                                                                                                                                                                                                                                                                                                                                                                                                                                                                                                                                                                                                                                                                                                                                                                                                                                                                                                                                                                                                                                                                                                                                                                                                                                                                                                                                                                                                                                                                                                                                                                                                                                                                                                                                    | 3.1475850  | -0.3997790 | -0.0041490 |            |   |           |           |            |   |            |           |            |   |           |           |           |    |           |            |            |                                                                                                                                                                                                                                                                                                                                                                                                                                                                                                                                                                                                                                |           |           |            |            |           |            |            |            |           |            |           |            |            |           |            |            |            |            |           |   |            |           |           |   |            |           |           |   |            |            |            |   |            |            |            |   |            |           |           |   |            |           |           |   |            |            |           |   |            |            |            |   |            |            |            |   |           |            |            |                                                                                                                                                                                                                                                                                                                                                                                                                                                                                                                                                                                                                                                                                                                                                                                                                                                                                                                                                                                                                                                                                                                                                                                                                                                                                                                                                                                                  |   |            |           |           |   |            |            |            |   |            |           |            |   |            |           |           |   |           |           |           |   |            |            |           |   |           |           |            |   |            |           |           |   |           |            |           |   |            |            |           |   |           |            |            |   |           |           |            |   |           |            |           |   |           |            |            |
| C                                                                                                                                                                                                                                                                                                                                                                                                                                                                                                                                                                                                                                                                                                                                                                                                                                                                                                                                                                                                                                                                                                                                                                                                                                                                                                                                                                                                                                                                                                                                                                                                                                                                                                                                                                                                                                                                     | 2.3080950  | 0.0330890  | -0.0002350 |            |   |           |           |            |   |            |           |            |   |           |           |           |    |           |            |            |                                                                                                                                                                                                                                                                                                                                                                                                                                                                                                                                                                                                                                |           |           |            |            |           |            |            |            |           |            |           |            |            |           |            |            |            |            |           |   |            |           |           |   |            |           |           |   |            |            |            |   |            |            |            |   |            |           |           |   |            |           |           |   |            |            |           |   |            |            |            |   |            |            |            |   |           |            |            |                                                                                                                                                                                                                                                                                                                                                                                                                                                                                                                                                                                                                                                                                                                                                                                                                                                                                                                                                                                                                                                                                                                                                                                                                                                                                                                                                                                                  |   |            |           |           |   |            |            |            |   |            |           |            |   |            |           |           |   |           |           |           |   |            |            |           |   |           |           |            |   |            |           |           |   |           |            |           |   |            |            |           |   |           |            |            |   |           |           |            |   |           |            |           |   |           |            |            |
| O                                                                                                                                                                                                                                                                                                                                                                                                                                                                                                                                                                                                                                                                                                                                                                                                                                                                                                                                                                                                                                                                                                                                                                                                                                                                                                                                                                                                                                                                                                                                                                                                                                                                                                                                                                                                                                                                     | 1.7948570  | -1.1099260 | -0.0001710 |            |   |           |           |            |   |            |           |            |   |           |           |           |    |           |            |            |                                                                                                                                                                                                                                                                                                                                                                                                                                                                                                                                                                                                                                |           |           |            |            |           |            |            |            |           |            |           |            |            |           |            |            |            |            |           |   |            |           |           |   |            |           |           |   |            |            |            |   |            |            |            |   |            |           |           |   |            |           |           |   |            |            |           |   |            |            |            |   |            |            |            |   |           |            |            |                                                                                                                                                                                                                                                                                                                                                                                                                                                                                                                                                                                                                                                                                                                                                                                                                                                                                                                                                                                                                                                                                                                                                                                                                                                                                                                                                                                                  |   |            |           |           |   |            |            |            |   |            |           |            |   |            |           |           |   |           |           |           |   |            |            |           |   |           |           |            |   |            |           |           |   |           |            |           |   |            |            |           |   |           |            |            |   |           |           |            |   |           |            |           |   |           |            |            |
| O                                                                                                                                                                                                                                                                                                                                                                                                                                                                                                                                                                                                                                                                                                                                                                                                                                                                                                                                                                                                                                                                                                                                                                                                                                                                                                                                                                                                                                                                                                                                                                                                                                                                                                                                                                                                                                                                     | 1.7602120  | 1.1504770  | -0.0000570 |            |   |           |           |            |   |            |           |            |   |           |           |           |    |           |            |            |                                                                                                                                                                                                                                                                                                                                                                                                                                                                                                                                                                                                                                |           |           |            |            |           |            |            |            |           |            |           |            |            |           |            |            |            |            |           |   |            |           |           |   |            |           |           |   |            |            |            |   |            |            |            |   |            |           |           |   |            |           |           |   |            |            |           |   |            |            |            |   |            |            |            |   |           |            |            |                                                                                                                                                                                                                                                                                                                                                                                                                                                                                                                                                                                                                                                                                                                                                                                                                                                                                                                                                                                                                                                                                                                                                                                                                                                                                                                                                                                                  |   |            |           |           |   |            |            |            |   |            |           |            |   |            |           |           |   |           |           |           |   |            |            |           |   |           |           |            |   |            |           |           |   |           |            |           |   |            |            |           |   |           |            |            |   |           |           |            |   |           |            |           |   |           |            |            |
| O                                                                                                                                                                                                                                                                                                                                                                                                                                                                                                                                                                                                                                                                                                                                                                                                                                                                                                                                                                                                                                                                                                                                                                                                                                                                                                                                                                                                                                                                                                                                                                                                                                                                                                                                                                                                                                                                     | 3.7175950  | 0.0761650  | -0.0003980 |            |   |           |           |            |   |            |           |            |   |           |           |           |    |           |            |            |                                                                                                                                                                                                                                                                                                                                                                                                                                                                                                                                                                                                                                |           |           |            |            |           |            |            |            |           |            |           |            |            |           |            |            |            |            |           |   |            |           |           |   |            |           |           |   |            |            |            |   |            |            |            |   |            |           |           |   |            |           |           |   |            |            |           |   |            |            |            |   |            |            |            |   |           |            |            |                                                                                                                                                                                                                                                                                                                                                                                                                                                                                                                                                                                                                                                                                                                                                                                                                                                                                                                                                                                                                                                                                                                                                                                                                                                                                                                                                                                                  |   |            |           |           |   |            |            |            |   |            |           |            |   |            |           |           |   |           |           |           |   |            |            |           |   |           |           |            |   |            |           |           |   |           |            |           |   |            |            |           |   |           |            |            |   |           |           |            |   |           |            |           |   |           |            |            |

|                                                                                                 |            |            |            |                                                                                                 |            |            |            |
|-------------------------------------------------------------------------------------------------|------------|------------|------------|-------------------------------------------------------------------------------------------------|------------|------------|------------|
| Cs                                                                                              | -3.1479490 | -0.3995760 | 0.0045100  | H                                                                                               | 4.0153180  | -0.8433500 | -0.0002100 |
|                                                                                                 |            |            |            | Cs                                                                                              | -1.3826400 | -0.0052530 | 0.0001200  |
| <b>TS TS<sup>RS</sup>-1</b>                                                                     |            |            |            | <b>TS TS<sup>RS</sup>-1</b>                                                                     |            |            |            |
|                |            |            |            |              |            |            |            |
| E = -989.896632, H (0K) = -989.647164,<br>H (298K) = -989.625111,<br>G (298K) = -989.703325 au. |            |            |            | E = -989.896470, H (0K) = -989.646915,<br>H (298K) = -989.624862,<br>G (298K) = -989.703020 au. |            |            |            |
| Imaginary frequency = 1.                                                                        |            |            |            | Imaginary frequency = 1.                                                                        |            |            |            |
| C                                                                                               | -1.8265620 | -2.3073440 | -0.7224110 | C                                                                                               | -1.8199900 | -2.2405340 | -0.7274560 |
| N                                                                                               | -1.6632560 | -3.1846970 | -1.6061330 | N                                                                                               | -1.7130690 | -3.1008760 | -1.6355040 |
| C                                                                                               | -0.4093350 | -2.5994390 | -0.8998140 | C                                                                                               | -0.4161940 | -2.5593830 | -0.9618590 |
| C                                                                                               | 0.4480070  | -1.6735360 | -1.7109300 | C                                                                                               | 0.4253820  | -1.6281400 | -1.7783280 |
| O                                                                                               | -0.0350550 | -1.0806090 | -2.6921430 | O                                                                                               | -0.0739620 | -0.9802400 | -2.7141660 |
| C                                                                                               | 1.8023100  | -1.5425800 | -1.2576930 | C                                                                                               | 1.8032060  | -1.5527850 | -1.3721650 |
| H                                                                                               | 0.0884250  | -3.2584330 | -0.1973040 | H                                                                                               | 0.1077520  | -3.2373740 | -0.2969940 |
| N                                                                                               | 2.6336590  | -0.7792330 | -1.8582390 | N                                                                                               | 2.5972310  | -0.7204640 | -1.9253010 |
| N                                                                                               | 3.5449820  | -0.1858410 | -2.2183280 | N                                                                                               | 3.4292000  | -0.0218690 | -2.2973580 |
| C                                                                                               | -2.8249690 | -1.5175620 | -0.0394230 | C                                                                                               | -2.7751560 | -1.4464590 | 0.0113870  |
| C                                                                                               | -4.7244060 | 0.0224970  | 1.2938410  | C                                                                                               | -4.5912890 | 0.0993250  | 1.4507540  |
| C                                                                                               | -5.1233290 | -0.8439930 | 0.2706570  | C                                                                                               | -5.0424240 | -0.7129960 | 0.4051160  |
| C                                                                                               | -4.1795620 | -1.6158470 | -0.3966670 | C                                                                                               | -4.1404180 | -1.4878320 | -0.3146170 |
| C                                                                                               | -2.4271370 | -0.6488770 | 0.9854780  | C                                                                                               | -2.3249320 | -0.6316670 | 1.0587130  |
| C                                                                                               | -3.3786860 | 0.1186310  | 1.6515120  | C                                                                                               | -3.2349790 | 0.1383640  | 1.7779860  |
| H                                                                                               | -4.4784130 | -2.2897430 | -1.1916340 | H                                                                                               | -4.4800000 | -2.1200880 | -1.1273020 |
| H                                                                                               | -6.1699370 | -0.9144400 | -0.0028040 | H                                                                                               | -6.0969410 | -0.7391470 | 0.1551830  |
| H                                                                                               | -5.4654190 | 0.6215640  | 1.8114440  | H                                                                                               | -5.2997050 | 0.7010140  | 2.0093440  |
| H                                                                                               | -3.0721370 | 0.7887930  | 2.4465550  | H                                                                                               | -2.8878900 | 0.7668430  | 2.5902730  |
| H                                                                                               | -1.3792370 | -0.5849940 | 1.2525940  | H                                                                                               | -1.2691830 | -0.6106100 | 1.3009580  |
| Cs                                                                                              | -0.0729820 | 3.0075940  | -0.6787420 | Cs                                                                                              | -0.0572310 | 3.0602540  | -0.6128880 |
| C                                                                                               | 2.8210540  | -2.2409860 | 0.3180510  | C                                                                                               | 2.6811090  | -2.4389790 | 0.2304240  |
| O                                                                                               | 4.0520910  | -2.2862460 | 0.0343000  | O                                                                                               | 2.2070140  | -3.5906000 | 0.4257340  |
| H                                                                                               | 2.2378750  | -3.1792690 | 0.3412960  | H                                                                                               | 3.6805660  | -2.3384340 | -0.2344750 |
| C                                                                                               | 2.3336040  | -1.2417900 | 1.3486650  | C                                                                                               | 2.4125710  | -1.3248130 | 1.2202900  |
| C                                                                                               | 1.1870760  | -1.4921010 | 2.1102630  | C                                                                                               | 3.2754250  | -0.2244230 | 1.3041330  |
| C                                                                                               | 3.0568290  | -0.0646900 | 1.5793070  | C                                                                                               | 1.3169270  | -1.3957390 | 2.0881320  |
| C                                                                                               | 0.7604180  | -0.5780960 | 3.0746130  | C                                                                                               | 3.0361670  | 0.7957220  | 2.2255090  |
| H                                                                                               | 0.6262340  | -2.4065240 | 1.9470440  | H                                                                                               | 4.1389400  | -0.1710490 | 0.6484140  |
| C                                                                                               | 2.6277510  | 0.8543770  | 2.5352670  | C                                                                                               | 1.0732190  | -0.3753860 | 3.0052840  |
| H                                                                                               | 3.9588470  | 0.1131080  | 1.0047390  | H                                                                                               | 0.6616090  | -2.2570240 | 2.0314840  |
| C                                                                                               | 1.4759250  | 0.6018510  | 3.2864860  | C                                                                                               | 1.9312480  | 0.7258510  | 3.0766700  |
| H                                                                                               | -0.1284110 | -0.7870350 | 3.6606010  | H                                                                                               | 3.7140040  | 1.6409880  | 2.2837530  |
| H                                                                                               | 3.1931800  | 1.7656580  | 2.7017020  | H                                                                                               | 0.2162500  | -0.4377800 | 3.6679850  |
| H                                                                                               | 1.1450950  | 1.3138050  | 4.0350310  | H                                                                                               | 1.7451320  | 1.5170940  | 3.7949480  |
| <b>Molecule (RR,SR)-A</b>                                                                       |            |            |            | <b>Molecule (RR,RR)-A</b>                                                                       |            |            |            |

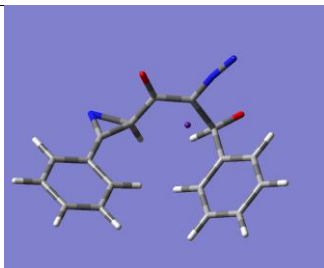

E = -989.899490, H (0K) = -989.648946,  
H (298K) = -989.626744,  
G (298K) = -989.704704 au.  
Imaginary frequency = 0.

|    |            |            |            |
|----|------------|------------|------------|
| C  | -1.7975790 | -2.3933380 | -0.5319030 |
| N  | -1.6337500 | -3.3174470 | -1.3655260 |
| C  | -0.3815780 | -2.7160090 | -0.6734890 |
| C  | 0.4862150  | -1.8462700 | -1.5317960 |
| O  | 0.0245320  | -1.3375710 | -2.5642520 |
| C  | 1.8471850  | -1.6383900 | -1.0881190 |
| H  | 0.0959400  | -3.3410180 | 0.0713100  |
| N  | 2.5835890  | -0.8732130 | -1.8353760 |
| N  | 3.3709280  | -0.2567890 | -2.3712090 |
| C  | -2.7908080 | -1.5539690 | 0.0964940  |
| C  | -4.6848410 | 0.0778930  | 1.3230980  |
| C  | -5.0769090 | -0.8068910 | 0.3130780  |
| C  | -4.1360470 | -1.6251740 | -0.3007270 |
| C  | -2.3992800 | -0.6662220 | 1.1075790  |
| C  | -3.3487110 | 0.1465500  | 1.7207900  |
| H  | -4.4294980 | -2.3133370 | -1.0853370 |
| H  | -6.1158810 | -0.8552430 | 0.0077570  |
| H  | -5.4236050 | 0.7131780  | 1.7990140  |
| H  | -3.0476300 | 0.8313240  | 2.5053350  |
| H  | -1.3586500 | -0.6222910 | 1.4050500  |
| Cs | -0.1811540 | 2.9220940  | -0.8173020 |
| C  | 2.6525970  | -2.1371690 | 0.2597430  |
| O  | 3.9379620  | -2.3543690 | 0.0425210  |
| H  | 2.0588700  | -3.0367120 | 0.5310820  |
| C  | 2.3341450  | -1.0556370 | 1.3134900  |
| C  | 1.2390040  | -1.1703500 | 2.1757140  |
| C  | 3.1591860  | 0.0703960  | 1.4253940  |
| C  | 0.9634510  | -0.1794750 | 3.1215790  |
| H  | 0.5959410  | -2.0423390 | 2.1080140  |
| C  | 2.8844800  | 1.0665970  | 2.3615160  |
| H  | 4.0259710  | 0.1419380  | 0.7776190  |
| C  | 1.7827290  | 0.9464080  | 3.2145500  |
| H  | 0.1125800  | -0.2887650 | 3.7864170  |
| H  | 3.5319030  | 1.9349760  | 2.4334220  |
| H  | 1.5727980  | 1.7170790  | 3.9486260  |

Molecule (RR,SR)-B

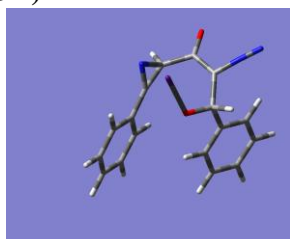

E = -989.889812, H (0K) = -989.639371,

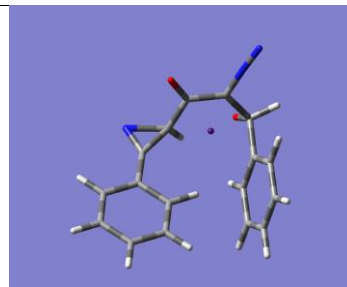

E = -989.901622, H (0K) = -989.650734,  
H (298K) = -989.628761,  
G (298K) = -989.705605 au.  
Imaginary frequency = 0.

|    |            |            |            |
|----|------------|------------|------------|
| C  | 0.6366900  | -1.8067410 | -1.8287840 |
| N  | 1.1558470  | -1.7151440 | -2.9684240 |
| C  | 1.7253660  | -0.8378080 | -1.8186190 |
| C  | 1.3982750  | 0.6215750  | -1.8758020 |
| O  | 0.5204650  | 1.0512130  | -2.6339930 |
| C  | 2.1541360  | 1.4676100  | -0.9705690 |
| H  | 2.7000520  | -1.1002640 | -1.4235330 |
| N  | 1.8661610  | 2.7309510  | -1.0000840 |
| N  | 1.6746160  | 3.8528360  | -0.9776210 |
| C  | -0.4077500 | -2.4459950 | -1.0639090 |
| C  | -2.4137250 | -3.6482730 | 0.4462530  |
| C  | -2.3219850 | -3.9107200 | -0.9249290 |
| C  | -1.3210460 | -3.3148180 | -1.6830030 |
| C  | -0.5010390 | -2.1830040 | 0.3094600  |
| C  | -1.5035190 | -2.7880270 | 1.0624090  |
| H  | -1.2407800 | -3.5111880 | -2.7462330 |
| H  | -3.0317820 | -4.5800700 | -1.3974510 |
| H  | -3.1961390 | -4.1172420 | 1.0326040  |
| H  | -1.5743420 | -2.5882650 | 2.1254810  |
| H  | 0.2108190  | -1.5116790 | 0.7736650  |
| Cs | -2.7951510 | 1.7579170  | 0.2896350  |
| C  | 3.3111260  | 1.0082680  | 0.0563030  |
| O  | 4.2925900  | 0.3540620  | -0.5477560 |
| H  | 3.6089860  | 1.9842710  | 0.5125960  |
| C  | 2.5964460  | 0.2441140  | 1.2052320  |
| C  | 1.5929430  | 0.8500810  | 1.9726020  |
| C  | 2.9834990  | -1.0581190 | 1.5217420  |
| C  | 0.9855230  | 0.1668340  | 3.0252540  |
| H  | 1.2853720  | 1.8672300  | 1.7452290  |
| C  | 2.3788470  | -1.7492080 | 2.5754460  |
| H  | 3.7657600  | -1.5141640 | 0.9259130  |
| C  | 1.3769910  | -1.1404180 | 3.3308200  |
| H  | 0.2085040  | 0.6508720  | 3.6084180  |
| H  | 2.6877470  | -2.7644070 | 2.8036670  |
| H  | 0.9036570  | -1.6753520 | 4.1471850  |

Molecule (RR,RR)-B

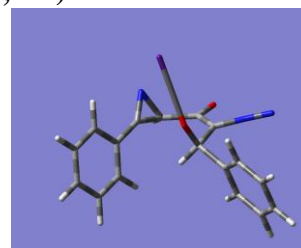

E = -989.894321, H (0K) = -989.643632,

H (298K) = -989.617256,  
 G (298K) = -989.695551 au.  
 Imaginary frequency = 0.

|    |            |            |            |
|----|------------|------------|------------|
| C  | 0.4592230  | -1.1979440 | -0.7677560 |
| C  | -0.0906100 | 0.9921670  | 1.5182440  |
| N  | -1.1859670 | 0.6340180  | 2.0359920  |
| C  | 0.0875920  | -0.2026750 | 2.3356630  |
| C  | 0.0796100  | -1.6428560 | 1.9172420  |
| O  | 0.0481280  | -2.4852960 | 2.8257110  |
| C  | 0.0571170  | -2.0379260 | 0.5180080  |
| H  | 0.4603110  | -0.1009650 | 3.3530370  |
| H  | 0.1346870  | -1.8619380 | -1.6057580 |
| C  | 2.0073320  | -1.1701690 | -0.8673100 |
| N  | -0.2327020 | -3.2901410 | 0.3134980  |
| N  | -0.5059600 | -4.3627440 | 0.0582270  |
| C  | 0.5320290  | 2.1646910  | 0.9356340  |
| O  | -0.1250530 | 0.0030550  | -0.7784260 |
| C  | 1.7277570  | 4.4611820  | -0.1035450 |
| C  | 2.5115890  | 3.4865120  | 0.5150750  |
| C  | 1.9165660  | 2.3375200  | 1.0314020  |
| C  | -0.2577350 | 3.1524700  | 0.3302730  |
| C  | 0.3420050  | 4.2921840  | -0.1940110 |
| C  | 2.7989090  | -2.3093280 | -0.6688440 |
| C  | 4.1854360  | -2.2501850 | -0.8099160 |
| C  | 4.8056710  | -1.0462060 | -1.1555020 |
| C  | 4.0244620  | 0.0906890  | -1.3627380 |
| C  | 2.6363240  | 0.0243510  | -1.2222490 |
| H  | 2.5197150  | 1.5671010  | 1.4968130  |
| H  | 3.5855930  | 3.6164830  | 0.5872200  |
| H  | 2.1920800  | 5.3516190  | -0.5129750 |
| H  | -0.2667340 | 5.0516930  | -0.6721570 |
| H  | -1.3312010 | 3.0169200  | 0.2653420  |
| H  | 2.0152730  | 0.8981820  | -1.3688320 |
| H  | 4.4951580  | 1.0319040  | -1.6291500 |
| H  | 5.8842930  | -0.9981680 | -1.2613710 |
| H  | 4.7825730  | -3.1416620 | -0.6471660 |
| H  | 2.3373660  | -3.2540870 | -0.3993150 |
| Cs | -3.2665630 | 0.0535640  | -0.7733820 |

**TS TS<sup>RS</sup>-2**

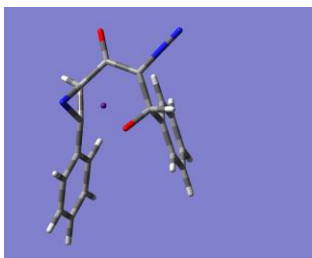

E = -989.888656, H (0K) = -989.638417,  
 H (298K) = -989.617102,  
 G (298K) = -989.693876 au.

Imaginary frequency = 1.

|   |            |            |            |
|---|------------|------------|------------|
| C | -0.1512410 | 1.1778140  | -0.7764570 |
| C | -0.1579040 | -0.8730730 | 1.2237440  |
| N | 0.9538480  | -0.9728400 | 1.8704430  |
| C | 0.0553830  | 0.2398620  | 2.1477320  |
| C | 0.5423970  | 1.6037230  | 1.7686550  |

H (298K) = -989.621438,  
 G (298K) = -989.700244 au.

Imaginary frequency = 0.

|    |            |            |            |
|----|------------|------------|------------|
| C  | 1.1729010  | -0.2460310 | -0.0583810 |
| C  | -1.4229210 | -1.0039390 | -1.6112030 |
| N  | -1.9242430 | 0.0634340  | -2.0520930 |
| C  | -0.6317320 | -0.4844760 | -2.7203930 |
| C  | 0.5856330  | 0.4011550  | -2.6605740 |
| O  | 0.8993890  | 0.9842230  | -3.7084710 |
| C  | 1.3295980  | 0.5663370  | -1.4292870 |
| H  | -0.7799620 | -0.8898320 | -3.7184960 |
| N  | 2.2188530  | 1.5155920  | -1.4400640 |
| N  | 3.0132460  | 2.3217860  | -1.3523110 |
| C  | -1.6846200 | -2.0558880 | -0.6559090 |
| O  | 0.2125030  | 0.2445290  | 0.7151910  |
| C  | -2.1947930 | -4.0799590 | 1.1883610  |
| C  | -1.1176100 | -4.1974950 | 0.3092690  |
| C  | -0.8608130 | -3.1876070 | -0.6152600 |
| C  | -2.7760280 | -1.9454940 | 0.2204060  |
| C  | -3.0258960 | -2.9553150 | 1.1408250  |
| H  | -0.0272520 | -3.2682820 | -1.3031900 |
| H  | -0.4792980 | -5.0728590 | 0.3444620  |
| H  | -2.3910270 | -4.8651050 | 1.9101430  |
| H  | -3.8642390 | -2.8709010 | 1.8229920  |
| H  | -3.4132160 | -1.0694850 | 0.1755000  |
| H  | 0.9759010  | -1.2684980 | -0.4509650 |
| C  | 2.5750480  | -0.3413930 | 0.5817760  |
| C  | 3.6004900  | -1.0797240 | -0.0214380 |
| C  | 2.8366820  | 0.3128210  | 1.7852540  |
| C  | 4.8619160  | -1.1617960 | 0.5665980  |
| H  | 3.4068550  | -1.5925390 | -0.9599800 |
| C  | 4.0996580  | 0.2373890  | 2.3790860  |
| H  | 2.0292970  | 0.8704710  | 2.2468720  |
| C  | 5.1164050  | -0.5001590 | 1.7719490  |
| H  | 5.6460110  | -1.7406690 | 0.0892120  |
| H  | 4.2892800  | 0.7519880  | 3.3158680  |
| H  | 6.0967870  | -0.5633320 | 2.2321370  |
| Cs | -2.1513230 | 2.0867780  | 0.9295720  |

**TS TS<sup>RR</sup>-2**

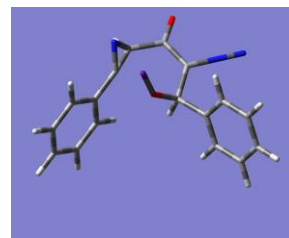

E = -989.890639, H (0K) = -989.640181,  
 H (298K) = -989.618908,  
 G (298K) = -989.695667 au.

Imaginary frequency = 1.

|   |            |           |            |
|---|------------|-----------|------------|
| C | 0.9582630  | 1.1213750 | -0.3417100 |
| C | -1.6076470 | 1.1376570 | 0.8508080  |
| N | -1.6668300 | 0.7380150 | 2.0751620  |
| C | -0.9980370 | 2.0879400 | 1.7790500  |
| C | 0.4718300  | 2.2669650 | 2.0097810  |
| O | 0.8526060  | 2.8958910 | 3.0050710  |

|    |            |            |            |    |            |            |            |
|----|------------|------------|------------|----|------------|------------|------------|
| O  | 0.9367860  | 2.3723010  | 2.6542030  | C  | 1.4007540  | 1.7346560  | 1.0234270  |
| C  | 0.5116120  | 1.9868410  | 0.3651240  | H  | -1.5558930 | 2.9608740  | 2.1191250  |
| H  | -0.4246780 | 0.2481250  | 3.1263350  | N  | 2.6631610  | 1.9099150  | 1.2851980  |
| H  | 0.2715200  | 1.5901140  | -1.7136410 | N  | 3.7658130  | 2.0501870  | 1.5094500  |
| C  | -1.6709000 | 1.4281870  | -0.8497730 | C  | -2.5046320 | 1.1095520  | -0.3074550 |
| N  | 1.0147910  | 3.1530310  | 0.0797730  | O  | -0.0744810 | 0.2510410  | -0.1359600 |
| N  | 1.4589760  | 4.1597500  | -0.1932580 | C  | -4.2283890 | 1.0505740  | -2.5110990 |
| C  | -1.2077080 | -1.8125890 | 0.8207900  | C  | -3.2773390 | 2.0668810  | -2.3923960 |
| O  | 0.1585350  | -0.1512140 | -0.6545020 | C  | -2.4179360 | 2.0967550  | -1.2960260 |
| C  | -3.2028730 | -3.6359190 | 0.0999880  | C  | -3.4706210 | 0.1014170  | -0.4198610 |
| C  | -3.5475800 | -2.3501980 | 0.5205860  | C  | -4.3238960 | 0.0696310  | -1.5209370 |
| C  | -2.5540430 | -1.4394100 | 0.8758310  | H  | -1.6738010 | 2.8797710  | -1.2030440 |
| C  | -0.8637560 | -3.1076430 | 0.4121820  | H  | -3.2059220 | 2.8351480  | -3.1547530 |
| C  | -1.8576080 | -4.0120700 | 0.0464270  | H  | -4.8957440 | 1.0274240  | -3.3656830 |
| C  | -2.3745660 | 2.2591080  | 0.0235910  | H  | -5.0673010 | -0.7158310 | -1.6051990 |
| C  | -3.7640320 | 2.3890930  | -0.0754030 | H  | -3.5521100 | -0.6512610 | 0.3568170  |
| C  | -4.4652950 | 1.6967720  | -1.0599060 | H  | 0.6551660  | 1.9876270  | -0.9620140 |
| C  | -3.7667970 | 0.8747420  | -1.9500410 | C  | 2.1222870  | 0.4398010  | -1.0548060 |
| C  | -2.3857980 | 0.7426240  | -1.8411110 | C  | 2.5133520  | 0.8449040  | -2.3329050 |
| H  | -2.8162250 | -0.4329480 | 1.1799940  | C  | 2.7812360  | -0.6435590 | -0.4583860 |
| H  | -4.5898020 | -2.0533830 | 0.5644710  | C  | 3.5398130  | 0.1798030  | -3.0094140 |
| H  | -3.9763320 | -4.3418530 | -0.1823610 | H  | 2.0098220  | 1.6831890  | -2.8045580 |
| H  | -1.5860880 | -5.0115570 | -0.2761770 | C  | 3.8066430  | -1.3074660 | -1.1271940 |
| H  | 0.1807650  | -3.3984620 | 0.3789600  | H  | 2.4894860  | -0.9615850 | 0.5370930  |
| H  | -1.8486580 | 0.0837240  | -2.5147490 | C  | 4.1884920  | -0.8982190 | -2.4087070 |
| H  | -4.3027970 | 0.3313940  | -2.7214000 | H  | 3.8303290  | 0.5042600  | -4.0031180 |
| H  | -5.5428620 | 1.7947900  | -1.1365390 | H  | 4.3110110  | -2.1419980 | -0.6513960 |
| H  | -4.2940820 | 3.0305240  | 0.6210990  | H  | 4.9859140  | -1.4156960 | -2.9310190 |
| H  | -1.8475050 | 2.8054760  | 0.7976610  | Cs | -0.5748360 | -2.6692030 | 0.7587850  |
| Cs | 3.3306390  | -0.7236620 | -0.6714860 |    |            |            |            |

Molecule (1RR,3SR,6RR)-Ph<sup>a</sup>-C

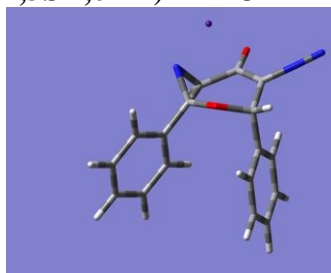

E = -989.896573, H (0K) = -989.644342,  
H (298K) = -989.623206,  
G (298K) = -989.699926 au.  
Imaginary frequency = 0.

|   |            |            |            |
|---|------------|------------|------------|
| C | 0.1127370  | -1.1770410 | -0.7247400 |
| C | 0.2174910  | 0.7668310  | 0.7815240  |
| N | -0.8418900 | 1.0070060  | 1.6418100  |
| C | 0.0820690  | -0.1198370 | 1.9619260  |
| C | -0.4870630 | -1.4871080 | 1.7997670  |
| O | -0.8591550 | -2.1793520 | 2.7502700  |
| C | -0.5783310 | -1.9275250 | 0.4044470  |
| H | 0.7648150  | -0.0361160 | 2.8129160  |
| H | -0.3678570 | -1.4536540 | -1.6683420 |
| C | 1.6079340  | -1.4819330 | -0.8506530 |
| N | -1.1787330 | -3.0529550 | 0.1603330  |
| N | -1.7083480 | -4.0426000 | -0.0017990 |
| C | 1.3531650  | 1.7352180  | 0.6102660  |

Molecule (1RR,3RR,6RR)-Ph<sup>e</sup>-C

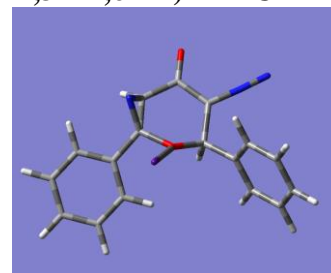

E = -989.900350, H (0K) = -989.647960,  
H (298K) = -989.626931,  
G (298K) = -989.702417 au.  
Imaginary frequency = 0.

|   |            |            |            |
|---|------------|------------|------------|
| C | 1.0606470  | -1.1168580 | 0.6239640  |
| C | -1.1752180 | -1.1557670 | -0.3747930 |
| N | -1.2935820 | -1.3483630 | -1.7490010 |
| C | -0.9240870 | -2.5205070 | -0.9276590 |
| C | 0.4740240  | -3.0262780 | -1.0534100 |
| O | 0.7577730  | -4.0533650 | -1.6739280 |
| C | 1.4747250  | -2.1893070 | -0.3863420 |
| H | -1.6543070 | -3.3227800 | -0.7681620 |
| N | 2.7242480  | -2.5086400 | -0.5412320 |
| N | 3.7997360  | -2.8259220 | -0.7094850 |
| C | -2.3604110 | -0.8706120 | 0.5125370  |
| O | -0.0202990 | -0.3670380 | 0.0892010  |
| C | -4.6257930 | -0.3586490 | 2.1110590  |

|    |            |            |            |    |            |            |            |
|----|------------|------------|------------|----|------------|------------|------------|
| O  | -0.1204980 | 0.2168140  | -0.5709670 | C  | -3.3629960 | 0.0699490  | 2.5197250  |
| C  | 3.4436130  | 3.5818080  | 0.2759990  | C  | -2.2396150 | -0.1867170 | 1.7303950  |
| C  | 3.7088550  | 2.3013640  | 0.7614060  | C  | -3.6362100 | -1.2943040 | 0.1104010  |
| C  | 2.6696830  | 1.3816510  | 0.9205800  | C  | -4.7559580 | -1.0461220 | 0.9015340  |
| C  | 1.0941120  | 3.0250500  | 0.1278080  | H  | -1.2642700 | 0.1524350  | 2.0550420  |
| C  | 2.1302500  | 3.9406530  | -0.0434940 | H  | -3.2484110 | 0.6071840  | 3.4556330  |
| C  | 2.2844410  | -2.3657840 | -0.0097970 | H  | -5.4979390 | -0.1585660 | 2.7240850  |
| C  | 3.6594920  | -2.5718650 | -0.1553320 | H  | -5.7329940 | -1.3834870 | 0.5712560  |
| C  | 4.3680010  | -1.8992300 | -1.1482450 | H  | -3.7399440 | -1.8137780 | -0.8356940 |
| C  | 3.6936860  | -1.0213000 | -2.0020710 | H  | 0.7276500  | -1.6300170 | 1.5358180  |
| C  | 2.3255980  | -0.8163830 | -1.8526220 | C  | 2.1668080  | -0.1474010 | 0.9745420  |
| H  | 2.8824340  | 0.3797880  | 1.2759950  | C  | 2.5249450  | 0.0623490  | 2.3075960  |
| H  | 4.7252860  | 2.0139030  | 1.0095140  | C  | 2.8134290  | 0.5803760  | -0.0323890 |
| H  | 4.2503100  | 4.2955210  | 0.1474290  | C  | 3.5159950  | 0.9902020  | 2.6352560  |
| H  | 1.9164370  | 4.9352830  | -0.4210570 | H  | 2.0261100  | -0.4990440 | 3.0907840  |
| H  | 0.0739310  | 3.3101450  | -0.1090710 | C  | 3.7994930  | 1.5083280  | 0.2930030  |
| H  | 1.8074440  | -0.1198820 | -2.5027720 | H  | 2.5421090  | 0.4176030  | -1.0700270 |
| H  | 4.2369510  | -0.4940020 | -2.7789110 | C  | 4.1529710  | 1.7156890  | 1.6292710  |
| H  | 5.4353770  | -2.0562390 | -1.2595350 | H  | 3.7871700  | 1.1454730  | 3.6737980  |
| H  | 4.1728220  | -3.2559000 | 0.5119330  | H  | 4.2947750  | 2.0677220  | -0.4931910 |
| H  | 1.7477790  | -2.8950140 | 0.7690940  | H  | 4.9223360  | 2.4370360  | 1.8821080  |
| Cs | -3.4149110 | 0.7728890  | -0.5993570 | Cs | -0.6016620 | 2.5097760  | -1.1562500 |

Ts TS<sup>RS</sup>-3

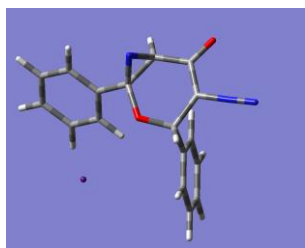

E = -989.896729, H (0K) = -989.644369,  
H (298K) = -989.624250,  
G (298K) = -989.695931 au.

Imaginary frequency = 1.

|   |            |            |            |
|---|------------|------------|------------|
| C | -1.5036550 | -0.4707080 | -0.7574950 |
| C | -0.2836680 | 1.7348140  | -0.5177100 |
| N | -0.6740630 | 2.6000190  | -1.5132010 |
| C | -1.5636520 | 2.4785610  | -0.3221330 |
| C | -2.8572040 | 1.8056310  | -0.5672060 |
| O | -3.9464000 | 2.3801370  | -0.4744030 |
| C | -2.7340430 | 0.4037040  | -0.9792060 |
| H | -1.6274600 | 3.2993880  | 0.3995440  |
| H | -1.4469710 | -1.1845980 | -1.5848850 |
| C | -1.5696130 | -1.2695620 | 0.5411280  |
| N | -3.8286300 | -0.1927630 | -1.3489640 |
| N | -4.8037610 | -0.6783040 | -1.6649850 |
| C | 0.9010460  | 1.9862390  | 0.3885880  |
| O | -0.2898230 | 0.2753180  | -0.7952030 |
| C | 3.0999540  | 2.5014330  | 2.0686410  |
| C | 2.2724850  | 1.4007460  | 2.3082260  |
| C | 1.1854220  | 1.1451980  | 1.4745290  |
| C | 1.7298380  | 3.0895540  | 0.1624560  |
| C | 2.8235650  | 3.3449080  | 0.9925440  |
| C | -1.9709670 | -0.6833340 | 1.7471460  |
| C | -1.9347030 | -1.4125520 | 2.9342000  |
| C | -1.5008940 | -2.7403600 | 2.9302270  |

Molecule (1RR,3SR,6RR)-Ph<sup>e</sup>-C

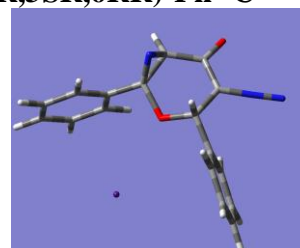

E = -989.908510, H (0K) = -989.656094,  
H (298K) = -989.635071,  
G (298K) = -989.709864 au.

Imaginary frequency = 0.

|   |            |            |            |
|---|------------|------------|------------|
| C | 1.5841020  | 0.6321950  | 0.7419480  |
| C | -0.4689660 | 1.9563990  | 0.5910920  |
| N | -0.0774050 | 2.7479940  | 1.6300830  |
| C | 0.2761490  | 3.2079120  | 0.2432860  |
| C | 1.6752130  | 3.0953750  | -0.2167420 |
| O | 2.2640960  | 3.9957690  | -0.8273710 |
| C | 2.3182400  | 1.8069280  | 0.0894580  |
| H | -0.2478070 | 4.0607120  | -0.1946400 |
| H | 1.6330180  | 0.7580810  | 1.8273090  |
| C | 2.1290040  | -0.7295730 | 0.3689890  |
| N | 3.5608790  | 1.6783780  | -0.2612840 |
| N | 4.6478780  | 1.6058850  | -0.5785140 |
| C | -1.8898400 | 1.6991380  | 0.1677230  |
| O | 0.2231720  | 0.6553230  | 0.3224690  |
| C | -4.5171540 | 1.0791710  | -0.5935400 |
| C | -3.5366780 | 1.2889980  | -1.5659800 |
| C | -2.2289960 | 1.5931550  | -1.1857630 |
| C | -2.8794160 | 1.5025670  | 1.1355740  |
| C | -4.1857200 | 1.1885560  | 0.7588130  |
| C | 2.3018120  | -1.0880650 | -0.9742290 |
| C | 2.7053810  | -2.3775100 | -1.3132940 |
| C | 2.9400990  | -3.3247380 | -0.3128410 |

|    |            |            |            |    |            |            |            |
|----|------------|------------|------------|----|------------|------------|------------|
| C  | -1.1090250 | -3.3351170 | 1.7309000  | C  | 2.7771440  | -2.9720810 | 1.0265140  |
| C  | -1.1449440 | -2.6015500 | 0.5436400  | C  | 2.3742780  | -1.6785000 | 1.3646940  |
| H  | 0.5546510  | 0.2843940  | 1.6587260  | H  | -1.4629460 | 1.7404790  | -1.9397960 |
| H  | 2.4760540  | 0.7404840  | 3.1450030  | H  | -3.7905660 | 1.2134740  | -2.6181180 |
| H  | 3.9484550  | 2.6986260  | 2.7149870  | H  | -5.5331300 | 0.8383880  | -0.8874920 |
| H  | 3.4599270  | 4.2016090  | 0.7962030  | H  | -4.9444420 | 1.0307660  | 1.5181740  |
| H  | 1.5061270  | 3.7457920  | -0.6710660 | H  | -2.6194320 | 1.5932610  | 2.1849700  |
| H  | -0.8428830 | -3.0688040 | -0.3887110 | H  | 2.2373990  | -1.4075330 | 2.4065210  |
| H  | -0.7793880 | -4.3684530 | 1.7174600  | H  | 2.9598290  | -3.7017420 | 1.8079030  |
| H  | -1.4755310 | -3.3078060 | 3.8541270  | H  | 3.2502660  | -4.3297220 | -0.5776390 |
| H  | -2.2453020 | -0.9452730 | 3.8624750  | H  | 2.8332240  | -2.6462140 | -2.3563160 |
| H  | -2.3076380 | 0.3472760  | 1.7629020  | H  | 2.1074520  | -0.3589320 | -1.7534780 |
| Cs | 2.4504600  | -1.4555380 | -1.1543770 | Cs | -1.4816070 | -2.1728200 | -0.0520800 |

Molecule (1RR,3SR,6RR)-Ph<sup>e</sup>-4

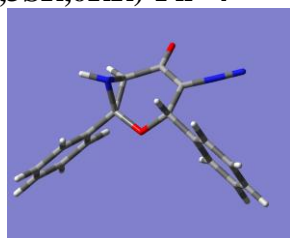

E = -970.552904, H (0K) = -970.286192,  
H (298K) = -970.267656,  
G (298K) = -970.334625 au.

Imaginary frequency = 0.

|   |            |            |            |
|---|------------|------------|------------|
| C | 1.0249150  | 0.1765050  | 0.7111610  |
| O | -0.2422250 | -0.3503830 | 0.2745100  |
| C | -1.3595630 | 0.4822830  | 0.4898030  |
| N | -1.3007930 | 1.3387460  | 1.6513880  |
| C | -1.2202570 | 1.9570880  | 0.2885800  |
| C | 0.1112250  | 2.4991300  | -0.1161440 |
| O | 0.2340170  | 3.5985120  | -0.6519770 |
| C | 1.2083960  | 1.5718880  | 0.1104530  |
| H | -2.0713290 | 2.5226060  | -0.0713930 |
| H | -2.2257710 | 1.4923480  | 2.0463210  |
| H | 1.0113810  | 0.2590430  | 1.7998190  |
| C | 2.1039470  | -0.7915990 | 0.2879760  |
| N | 2.3959860  | 1.9603210  | -0.2689130 |
| N | 3.4100340  | 2.3273730  | -0.5992970 |
| C | -2.6130200 | -0.2418280 | 0.1136270  |
| C | -3.1963310 | -1.1258140 | 1.0267300  |
| C | -4.3524920 | -1.8232150 | 0.6818390  |
| C | -4.9278580 | -1.6428990 | -0.5778900 |
| C | -4.3447500 | -0.7636800 | -1.4909550 |
| C | -3.1876140 | -0.0644480 | -1.1463340 |
| C | 2.2223110  | -1.1782870 | -1.0518670 |
| C | 3.2342380  | -2.0521350 | -1.4410320 |
| C | 4.1409750  | -2.5393360 | -0.4959810 |
| C | 4.0288130  | -2.1521850 | 0.8386270  |
| C | 3.0100830  | -1.2813650 | 1.2299610  |
| H | -2.7472460 | -1.2620280 | 2.0048500  |
| H | -4.8045200 | -2.5047910 | 1.3939030  |
| H | -5.8284800 | -2.1847190 | -0.8452560 |
| H | -4.7899590 | -0.6208150 | -2.4693600 |
| H | -2.7321980 | 0.6211230  | -1.8523190 |
| H | 1.5207740  | -0.7947820 | -1.7842630 |

Molecule (1RR,3RR,6RR)-Ph<sup>e</sup>-4

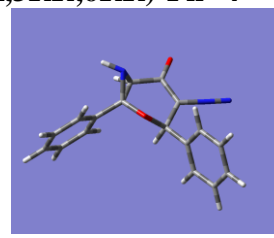

E = -970.549330, H (0K) = -970.282605,  
H (298K) = -970.263980,  
G (298K) = -970.331523 au.

Imaginary frequency = 0.

|   |            |            |            |
|---|------------|------------|------------|
| C | 0.7570210  | 0.0386370  | -0.3441010 |
| O | -0.1925030 | -0.1582020 | 0.7151830  |
| C | -1.3683750 | 0.6178040  | 0.5623670  |
| N | -1.4709080 | 1.6631410  | 1.5683120  |
| C | -1.2039580 | 2.0318530  | 0.1473280  |
| C | 0.1729230  | 2.5688690  | -0.1401420 |
| O | 0.4062800  | 3.7724980  | -0.1951380 |
| C | 1.1499590  | 1.5189980  | -0.3480560 |
| H | -2.0003200 | 2.5130800  | -0.4098330 |
| H | -2.4474970 | 1.8541610  | 1.7873830  |
| N | 2.3888480  | 1.8759190  | -0.5585510 |
| N | 3.4485550  | 2.2167800  | -0.7388100 |
| C | -2.5604930 | -0.1964460 | 0.1679790  |
| C | -3.1840060 | -1.0129790 | 1.1184450  |
| C | -4.2707420 | -1.8050220 | 0.7547510  |
| C | -4.7396300 | -1.7888530 | -0.5612860 |
| C | -4.1191130 | -0.9772560 | -1.5107590 |
| C | -3.0304620 | -0.1828140 | -1.1473860 |
| H | -2.8196950 | -1.0232820 | 2.1402280  |
| H | -4.7533690 | -2.4325400 | 1.4959590  |
| H | -5.5867220 | -2.4046650 | -0.8429730 |
| H | -4.4812280 | -0.9605060 | -2.5327970 |
| H | -2.5486240 | 0.4510370  | -1.8834140 |
| C | 1.9304390  | -0.8835830 | -0.1236350 |
| C | 2.6048270  | -0.8823570 | 1.1027170  |
| C | 2.3684360  | -1.7199650 | -1.1517570 |
| C | 3.7030480  | -1.7163370 | 1.2973430  |
| H | 2.2666350  | -0.2299870 | 1.8999490  |
| C | 3.4737420  | -2.5504990 | -0.9587160 |
| H | 1.8462080  | -1.7212380 | -2.1026460 |
| C | 4.1407470  | -2.5507360 | 0.2656430  |

|                                                                                                                             |            |            |            |                                                                                                                             |            |            |            |
|-----------------------------------------------------------------------------------------------------------------------------|------------|------------|------------|-----------------------------------------------------------------------------------------------------------------------------|------------|------------|------------|
| H                                                                                                                           | 3.3188670  | -2.3513940 | -2.4799270 | H                                                                                                                           | 4.2198970  | -1.7141360 | 2.2506300  |
| H                                                                                                                           | 4.9305980  | -3.2173770 | -0.8007550 | H                                                                                                                           | 3.8089860  | -3.1970290 | -1.7621160 |
| H                                                                                                                           | 4.7293820  | -2.5284430 | 1.5758630  | H                                                                                                                           | 4.9977820  | -3.1976480 | 0.4175230  |
| H                                                                                                                           | 2.9194740  | -0.9814990 | 2.2686860  | H                                                                                                                           | 0.2760810  | -0.1983630 | -1.2992980 |
| <b>Molecule D</b>                                                                                                           |            |            |            | <b>TS TS<sup>D-E</sup></b>                                                                                                  |            |            |            |
|                                            |            |            |            |                                          |            |            |            |
| E = -970.995110, H (0K) = -970.714767,<br>H (298K) = -970.696023,<br>G (298K) = -970.763555 au.<br>Imaginary frequency = 0. |            |            |            | E = -970.993259, H (0K) = -970.714447,<br>H (298K) = -970.695844,<br>G (298K) = -970.761732 au.<br>Imaginary frequency = 1. |            |            |            |
| C                                                                                                                           | 1.0832040  | 0.2281820  | 0.7360830  | C                                                                                                                           | 1.0784030  | 0.2428660  | 0.6916470  |
| O                                                                                                                           | -0.2356600 | -0.3221730 | 0.4224820  | O                                                                                                                           | -0.2325130 | -0.3350960 | 0.3416560  |
| C                                                                                                                           | -1.3310160 | 0.4890770  | 0.4184980  | C                                                                                                                           | -1.3184010 | 0.4240150  | 0.2800250  |
| N                                                                                                                           | -1.4584340 | 1.4934250  | 1.5970020  | N                                                                                                                           | -1.4725930 | 1.5569870  | 1.6606530  |
| C                                                                                                                           | -1.2020240 | 1.9487430  | 0.1876420  | C                                                                                                                           | -1.2299630 | 1.8979910  | 0.2406890  |
| C                                                                                                                           | 0.1597060  | 2.5182820  | -0.1478370 | C                                                                                                                           | 0.1115400  | 2.5173620  | -0.1228660 |
| O                                                                                                                           | 0.2611630  | 3.6364630  | -0.6344980 | O                                                                                                                           | 0.1769720  | 3.6529850  | -0.5705840 |
| C                                                                                                                           | 1.2360660  | 1.5875020  | 0.0679960  | C                                                                                                                           | 1.2113520  | 1.6040830  | 0.0411740  |
| H                                                                                                                           | -2.0327600 | 2.4907420  | -0.2438260 | H                                                                                                                           | -2.0457230 | 2.4460700  | -0.2130950 |
| H                                                                                                                           | -2.3934860 | 1.6686170  | 1.9641020  | H                                                                                                                           | -2.4075140 | 1.7434390  | 2.0104870  |
| H                                                                                                                           | 1.1325220  | 0.3392450  | 1.8227320  | H                                                                                                                           | 1.0682180  | 0.3394050  | 1.7799260  |
| C                                                                                                                           | 2.1075110  | -0.7842980 | 0.2913270  | C                                                                                                                           | 2.1321530  | -0.7479290 | 0.2764000  |
| N                                                                                                                           | 2.4350960  | 1.9780850  | -0.3030270 | N                                                                                                                           | 2.3947130  | 2.0103660  | -0.3629460 |
| N                                                                                                                           | 3.4464100  | 2.3390520  | -0.6300760 | N                                                                                                                           | 3.3868000  | 2.3954700  | -0.7187720 |
| C                                                                                                                           | -2.5765110 | -0.2580270 | 0.0793320  | C                                                                                                                           | -2.5603640 | -0.3285510 | 0.0185130  |
| C                                                                                                                           | -3.0500400 | -1.2349710 | 0.9601360  | C                                                                                                                           | -2.6844200 | -1.6299770 | 0.5279810  |
| C                                                                                                                           | -4.1889780 | -1.9635150 | 0.6291170  | C                                                                                                                           | -3.8396370 | -2.3611880 | 0.2806180  |
| C                                                                                                                           | -4.8460720 | -1.7228460 | -0.5798830 | C                                                                                                                           | -4.8707410 | -1.8051140 | -0.4807480 |
| C                                                                                                                           | -4.3667220 | -0.7509210 | -1.4576290 | C                                                                                                                           | -4.7451240 | -0.5145780 | -0.9934560 |
| C                                                                                                                           | -3.2305390 | -0.0128510 | -1.1286770 | C                                                                                                                           | -3.5942240 | 0.2288500  | -0.7433920 |
| C                                                                                                                           | 2.2156980  | -1.1304090 | -1.0603820 | C                                                                                                                           | 2.2816140  | -1.0958400 | -1.0709390 |
| C                                                                                                                           | 3.1667030  | -2.0626820 | -1.4648910 | C                                                                                                                           | 3.2647700  | -2.0062790 | -1.4471290 |
| C                                                                                                                           | 4.0182050  | -2.6475260 | -0.5238800 | C                                                                                                                           | 4.1078960  | -2.5639840 | -0.4825810 |
| C                                                                                                                           | 3.9139890  | -2.3004750 | 0.8222620  | C                                                                                                                           | 3.9624990  | -2.2139600 | 0.8590730  |
| C                                                                                                                           | 2.9566680  | -1.3708730 | 1.2306390  | C                                                                                                                           | 2.9716440  | -1.3086670 | 1.2401190  |
| H                                                                                                                           | -2.5332420 | -1.4167560 | 1.8959600  | H                                                                                                                           | -1.8829200 | -2.0574550 | 1.1172840  |
| H                                                                                                                           | -4.5641300 | -2.7169800 | 1.3120270  | H                                                                                                                           | -3.9377050 | -3.3636520 | 0.6805460  |
| H                                                                                                                           | -5.7325410 | -2.2923660 | -0.8357420 | H                                                                                                                           | -5.7701960 | -2.3786910 | -0.6743130 |
| H                                                                                                                           | -4.8755750 | -0.5645220 | -2.3963380 | H                                                                                                                           | -5.5407120 | -0.0848240 | -1.5906520 |
| H                                                                                                                           | -2.8543500 | 0.7436720  | -1.8075370 | H                                                                                                                           | -3.5062370 | 1.2263250  | -1.1548710 |
| H                                                                                                                           | 1.5578590  | -0.6711710 | -1.7902580 | H                                                                                                                           | 1.6305860  | -0.6565090 | -1.8191500 |
| H                                                                                                                           | 3.2469230  | -2.3315880 | -2.5121040 | H                                                                                                                           | 3.3766060  | -2.2786120 | -2.4904770 |
| H                                                                                                                           | 4.7604970  | -3.3712210 | -0.8418030 | H                                                                                                                           | 4.8760700  | -3.2697050 | -0.7785640 |
| H                                                                                                                           | 4.5730840  | -2.7526270 | 1.5547150  | H                                                                                                                           | 4.6153540  | -2.6456580 | 1.6091530  |
| H                                                                                                                           | 2.8701410  | -1.1002190 | 2.2775460  | H                                                                                                                           | 2.8514590  | -1.0364610 | 2.2831920  |
| H                                                                                                                           | -0.7155540 | 1.5925770  | 2.2902560  | H                                                                                                                           | -0.7193790 | 1.6988380  | 2.3286590  |
| <b>Molecule E</b>                                                                                                           |            |            |            | <b>TS TS<sup>E-F</sup></b>                                                                                                  |            |            |            |

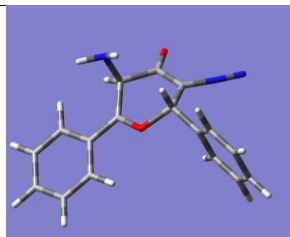

E = -971.006780, H (0K) = -970.726084,  
 H (298K) = -970.706863,  
 G (298K) = -970.773777 au.

Imaginary frequency = 0.

|   |            |            |            |
|---|------------|------------|------------|
| C | 1.0999310  | 0.3454240  | 0.6947360  |
| O | -0.2170490 | -0.3353090 | 0.4353170  |
| C | -1.3068960 | 0.3227000  | 0.2277510  |
| N | -1.4969210 | 2.2720970  | 1.6880520  |
| C | -1.3098010 | 1.8351150  | 0.2983980  |
| C | -0.0284950 | 2.4495490  | -0.2882620 |
| O | -0.0547160 | 3.5258370  | -0.8626480 |
| C | 1.1324000  | 1.6165700  | -0.1062790 |
| H | -2.1255150 | 2.2282740  | -0.3016900 |
| H | -2.3924990 | 1.9481260  | 2.0451940  |
| H | 1.0704990  | 0.5494010  | 1.7667050  |
| C | 2.1756480  | -0.6495950 | 0.3735010  |
| N | 2.2600700  | 2.0131270  | -0.6542970 |
| N | 3.1917130  | 2.4084430  | -1.1383150 |
| C | -2.4885090 | -0.4630130 | 0.0020180  |
| C | -2.3836200 | -1.8720120 | -0.1004060 |
| C | -3.5142130 | -2.6344950 | -0.3285810 |
| C | -4.7636180 | -2.0145760 | -0.4478450 |
| C | -4.8823940 | -0.6272920 | -0.3390190 |
| C | -3.7565690 | 0.1506680  | -0.1196830 |
| C | 2.3350910  | -1.1203230 | -0.9353820 |
| C | 3.3355440  | -2.0442570 | -1.2212370 |
| C | 4.1840480  | -2.4928050 | -0.2059590 |
| C | 4.0272460  | -2.0214370 | 1.0968400  |
| C | 3.0188640  | -1.1036400 | 1.3893850  |
| H | -1.4167740 | -2.3496480 | -0.0124460 |
| H | -3.4311670 | -3.7108350 | -0.4170110 |
| H | -5.6470670 | -2.6167630 | -0.6273300 |
| H | -5.8531200 | -0.1552860 | -0.4272400 |
| H | -3.8694570 | 1.2222720  | -0.0275010 |
| H | 1.6789550  | -0.7667730 | -1.7238720 |
| H | 3.4561100  | -2.4122700 | -2.2336310 |
| H | 4.9658400  | -3.2092890 | -0.4319820 |
| H | 4.6843300  | -2.3692620 | 1.8856610  |
| H | 2.8888780  | -0.7384980 | 2.4022080  |
| H | -0.7668660 | 1.9411630  | 2.3136300  |

#### Molecule F

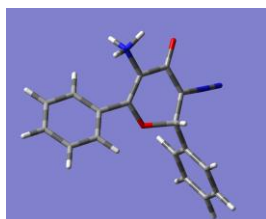

E = -971.038113, H (0K) = -970.755845,  
 H (298K) = -970.736808,

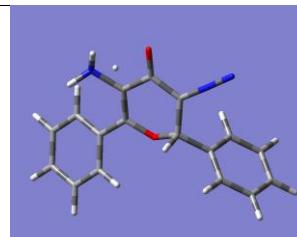

E = -970.936867, H (0K) = -970.662096,  
 H (298K) = -970.643001,  
 G (298K) = -970.709952 au.

Imaginary frequency = 1.

|   |            |            |            |
|---|------------|------------|------------|
| C | 1.0696740  | 0.1390130  | 0.6272020  |
| O | -0.1839060 | -0.3970490 | 0.0442630  |
| C | -1.2904220 | 0.3246790  | 0.0376750  |
| N | -2.4103220 | 2.6051800  | 0.1744360  |
| C | -1.2141700 | 1.7304390  | 0.0466090  |
| C | 0.0852120  | 2.4579110  | 0.1219890  |
| O | 0.1217070  | 3.6842290  | 0.0796240  |
| C | 1.2218330  | 1.5754920  | 0.1905760  |
| H | -1.8328800 | 2.0924920  | -0.9619970 |
| H | -3.1905500 | 2.2085860  | 0.6917250  |
| H | 0.9087810  | 0.0888380  | 1.7069970  |
| C | 2.1912060  | -0.7712670 | 0.2168150  |
| N | 2.4142250  | 2.0952310  | 0.0374550  |
| N | 3.4256000  | 2.5672350  | -0.1023410 |
| C | -2.5062780 | -0.4838930 | -0.0341300 |
| C | -2.4935740 | -1.7409250 | 0.6024150  |
| C | -3.6261410 | -2.5440340 | 0.5820700  |
| C | -4.7728300 | -2.1192600 | -0.0906910 |
| C | -4.7859350 | -0.8847800 | -0.7430490 |
| C | -3.6665150 | -0.0632380 | -0.7114070 |
| C | 2.5574450  | -0.8815850 | -1.1296070 |
| C | 3.6043070  | -1.7217660 | -1.4973920 |
| C | 4.2952520  | -2.4463970 | -0.5228850 |
| C | 3.9339270  | -2.3338890 | 0.8190050  |
| C | 2.8789650  | -1.4996030 | 1.1892850  |
| H | -1.6050550 | -2.0692640 | 1.1258610  |
| H | -3.6140460 | -3.5015790 | 1.0890340  |
| H | -5.6539600 | -2.7504720 | -0.1108820 |
| H | -5.6689790 | -0.5632370 | -1.2823000 |
| H | -3.6938600 | 0.8752340  | -1.2496210 |
| H | 2.0258730  | -0.3126920 | -1.8848370 |
| H | 3.8846520  | -1.8088960 | -2.5409700 |
| H | 5.1142260  | -3.0960510 | -0.8110690 |
| H | 4.4691580  | -2.8945810 | 1.5768600  |
| H | 2.5924260  | -1.4100060 | 2.2316280  |
| H | -2.1364490 | 3.5492700  | 0.4347550  |

#### Molecule G

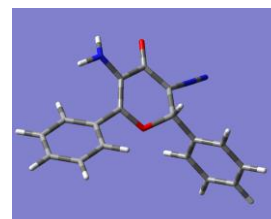

E = -970.587206, H (0K) = -970.320524,  
 H (298K) = -970.301313,

G (298K) = -970.803306 au.

Imaginary frequency = 0.

|   |            |            |            |
|---|------------|------------|------------|
| C | -1.0798780 | 0.1575000  | -0.6181510 |
| O | 0.1514750  | -0.4268430 | -0.0695220 |
| C | 1.2746150  | 0.3071490  | -0.1291540 |
| N | 2.4164460  | 2.4845230  | -0.4475980 |
| C | 1.2163700  | 1.6600170  | -0.2925360 |
| C | -0.0176050 | 2.4303810  | -0.1494260 |
| O | -0.0115940 | 3.6590110  | -0.0303750 |
| C | -1.1894540 | 1.5794130  | -0.1206980 |
| H | 2.1680430  | 3.3520690  | -0.9399470 |
| H | 2.8274830  | 2.7702280  | 0.4492010  |
| H | -0.9346070 | 0.1674200  | -1.7032320 |
| C | -2.2287370 | -0.7379170 | -0.2474290 |
| N | -2.3366930 | 2.0982160  | 0.2186700  |
| N | -3.3166010 | 2.5718200  | 0.5128200  |
| C | 2.4908490  | -0.5122710 | 0.0111570  |
| C | 2.5670070  | -1.7264550 | -0.6902560 |
| C | 3.7024660  | -2.5216540 | -0.5822410 |
| C | 4.7601680  | -2.1248640 | 0.2386140  |
| C | 4.6794220  | -0.9304760 | 0.9548530  |
| C | 3.5511870  | -0.1225800 | 0.8424600  |
| C | -2.5469060 | -0.9612740 | 1.0972350  |
| C | -3.6201750 | -1.7823690 | 1.4315520  |
| C | -4.3857390 | -2.3776460 | 0.4258540  |
| C | -4.0722800 | -2.1535600 | -0.9140810 |
| C | -2.9921800 | -1.3369120 | -1.2510430 |
| H | 1.7430360  | -2.0327190 | -1.3230170 |
| H | 3.7618680  | -3.4518050 | -1.1354360 |
| H | 5.6420610  | -2.7494800 | 0.3253930  |
| H | 5.4898460  | -0.6309880 | 1.6091290  |
| H | 3.4855420  | 0.7830010  | 1.4335780  |
| H | -1.9554330 | -0.4940780 | 1.8771880  |
| H | -3.8619070 | -1.9559680 | 2.4740910  |
| H | -5.2236750 | -3.0140520 | 0.6880730  |
| H | -4.6636310 | -2.6151240 | -1.6968030 |
| H | -2.7429760 | -1.1641460 | -2.2924470 |
| H | 3.1484590  | 2.0174950  | -0.9940870 |

G (298K) = -970.368948 au.

Imaginary frequency = 0.

|   |            |            |            |
|---|------------|------------|------------|
| C | 1.0287000  | 0.1389060  | 0.5815530  |
| O | -0.1712130 | -0.4004300 | -0.0122360 |
| C | -1.3059510 | 0.3675390  | 0.1066870  |
| N | -2.3560770 | 2.5382720  | 0.5943550  |
| C | -1.2590570 | 1.7208340  | 0.2915600  |
| C | 0.0178010  | 2.4400420  | 0.1234940  |
| O | 0.0639980  | 3.6659120  | -0.0290780 |
| C | 1.1782850  | 1.5675720  | 0.1044780  |
| H | -2.2365950 | 3.4821650  | 0.2438990  |
| H | 0.8671300  | 0.1509180  | 1.6666440  |
| C | 2.1891130  | -0.7571700 | 0.2377560  |
| N | 2.3369970  | 2.0640960  | -0.2161300 |
| N | 3.3344930  | 2.5199340  | -0.4917020 |
| C | -2.5252240 | -0.4552100 | -0.0021450 |
| C | -2.5875380 | -1.6855650 | 0.6724120  |
| C | -3.7230380 | -2.4856690 | 0.5786980  |
| C | -4.8071150 | -2.0778380 | -0.2005910 |
| C | -4.7458260 | -0.8666670 | -0.8916740 |
| C | -3.6140980 | -0.0606520 | -0.7957360 |
| C | 2.4820840  | -1.0538960 | -1.0981490 |
| C | 3.5716970  | -1.8626560 | -1.4111040 |
| C | 4.3819310  | -2.3713230 | -0.3928650 |
| C | 4.0952670  | -2.0727860 | 0.9385510  |
| C | 2.9980940  | -1.2694750 | 1.2534520  |
| H | -1.7448450 | -2.0053480 | 1.2736180  |
| H | -3.7616340 | -3.4282580 | 1.1134540  |
| H | -5.6900820 | -2.7028250 | -0.2748740 |
| H | -5.5755730 | -0.5533590 | -1.5154790 |
| H | -3.5663600 | 0.8619030  | -1.3631430 |
| H | 1.8559100  | -0.6530540 | -1.8874450 |
| H | 3.7919120  | -2.0934300 | -2.4474730 |
| H | 5.2324020  | -2.9978560 | -0.6382930 |
| H | 4.7205230  | -2.4663110 | 1.7322430  |
| H | 2.7710530  | -1.0396650 | 2.2890920  |
| H | -3.2647560 | 2.1692170  | 0.3543430  |

TS TS<sup>F-H</sup>

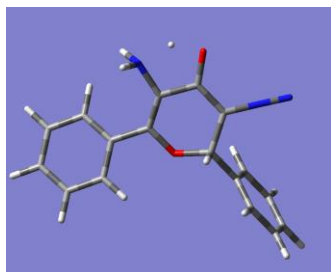

E = -971.015724, H (0K) = -970.739032,

H (298K) = -970.720475,

G (298K) = -970.786488 au.

Imaginary frequency = 1.

|   |            |            |            |
|---|------------|------------|------------|
| C | -1.0680550 | 0.1419400  | -0.6241480 |
| O | 0.1693390  | -0.4208770 | -0.0768200 |
| C | 1.3025440  | 0.3079350  | -0.0998970 |
| N | 2.2535680  | 2.6801690  | -0.2187220 |
| C | 1.2298920  | 1.6707510  | -0.1990100 |

Molecule H

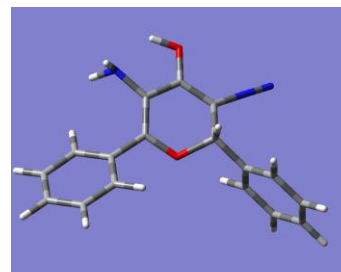

E = -971.021776, H (0K) = -970.742271,

H (298K) = -970.722968,

G (298K) = -970.790481 au.

Imaginary frequency = 0.

|   |            |            |           |
|---|------------|------------|-----------|
| C | 1.0717510  | 0.1409930  | 0.6390910 |
| O | -0.1753170 | -0.4221450 | 0.1105380 |
| C | -1.2925080 | 0.3156370  | 0.1398170 |
| N | -2.3397530 | 2.6057270  | 0.3572210 |
| C | -1.2480110 | 1.6950370  | 0.2591910 |

|   |            |            |            |   |            |            |            |
|---|------------|------------|------------|---|------------|------------|------------|
| C | -0.0318390 | 2.3593830  | -0.1227560 | C | 0.0109340  | 2.3420260  | 0.1398490  |
| O | 0.0689050  | 3.6334980  | -0.0249800 | O | 0.0445450  | 3.6460490  | 0.0047100  |
| C | -1.2010820 | 1.5805050  | -0.1480020 | C | 1.1796400  | 1.5679310  | 0.1402290  |
| H | 1.2602410  | 3.6253140  | -0.1131870 | H | -0.9080370 | 3.9273160  | 0.0626770  |
| H | 2.8648700  | 2.6900390  | 0.5937130  | H | -2.9958860 | 2.5569340  | -0.4130830 |
| H | -0.9371440 | 0.1460560  | -1.7104670 | H | 0.9515470  | 0.1587930  | 1.7264710  |
| C | -2.2060680 | -0.7568310 | -0.2293220 | C | 2.2061060  | -0.7597840 | 0.2417800  |
| N | -2.3771670 | 2.1220610  | 0.0764950  | N | 2.3437850  | 2.1054150  | -0.1577320 |
| N | -3.3899380 | 2.5657110  | 0.2686990  | N | 3.3478600  | 2.5410110  | -0.4024760 |
| C | 2.5090590  | -0.5181610 | 0.0086570  | C | -2.5011530 | -0.5022960 | 0.0032120  |
| C | 2.4950230  | -1.8011670 | -0.5681670 | C | -2.5533110 | -1.7347450 | 0.6782950  |
| C | 3.6251920  | -2.6080210 | -0.5072520 | C | -3.6869620 | -2.5335170 | 0.5834550  |
| C | 4.7741450  | -2.1557400 | 0.1435610  | C | -4.7651470 | -2.1265480 | -0.2042990 |
| C | 4.7885890  | -0.8920210 | 0.7359510  | C | -4.7070210 | -0.9175520 | -0.9001000 |
| C | 3.6668580  | -0.0729580 | 0.6675450  | C | -3.5851410 | -0.1029150 | -0.7944620 |
| C | -2.5243730 | -0.9439820 | 1.1206520  | C | 2.4981470  | -0.9787330 | -1.1093940 |
| C | -3.5861730 | -1.7709490 | 1.4759470  | C | 3.5584210  | -1.8075760 | -1.4647970 |
| C | -4.3390850 | -2.4071630 | 0.4858240  | C | 4.3354150  | -2.4133330 | -0.4742580 |
| C | -4.0255500 | -2.2179550 | -0.8594170 | C | 4.0478860  | -2.1920460 | 0.8719220  |
| C | -2.9572250 | -1.3950950 | -1.2178070 | C | 2.9812890  | -1.3675710 | 1.2310790  |
| H | 1.6049470  | -2.1513950 | -1.0749520 | H | -1.7147420 | -2.0484880 | 1.2873860  |
| H | 3.6096760  | -3.5895960 | -0.9665120 | H | -3.7287390 | -3.4735630 | 1.1211690  |
| H | 5.6536630  | -2.7877050 | 0.1936790  | H | -5.6462980 | -2.7534630 | -0.2817010 |
| H | 5.6725730  | -0.5455380 | 1.2585220  | H | -5.5337750 | -0.6117650 | -1.5305570 |
| H | 3.6910110  | 0.8876510  | 1.1623250  | H | -3.5386890 | 0.8134700  | -1.3674360 |
| H | -1.9423160 | -0.4451710 | 1.8880630  | H | 1.8974420  | -0.5034990 | -1.8774030 |
| H | -3.8289000 | -1.9173480 | 2.5223760  | H | 3.7809200  | -1.9793240 | -2.5118150 |
| H | -5.1682200 | -3.0480510 | 0.7644870  | H | 5.1630300  | -3.0559710 | -0.7533280 |
| H | -4.6079470 | -2.7108770 | -1.6295450 | H | 4.6490190  | -2.6615850 | 1.6422260  |
| H | -2.7074700 | -1.2478430 | -2.2629980 | H | 2.7513030  | -1.1957400 | 2.2769850  |
| H | 2.8127020  | 2.6950790  | -1.0705540 | H | -2.8461760 | 2.5205330  | 1.2336880  |

### TS TS<sup>H-I</sup>

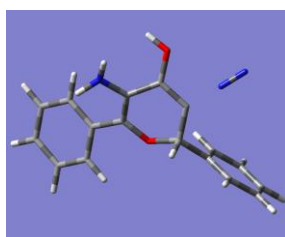

E = -970.977499, H (0K) = -970.702339,  
H (298K) = -970.682449,  
G (298K) = -970.750989 au.  
Imaginary frequency = 1.

|   |            |            |            |
|---|------------|------------|------------|
| C | -1.0666370 | 0.1759900  | -0.8489540 |
| O | 0.1901550  | -0.4710700 | -0.3877890 |
| C | 1.2821040  | 0.2535330  | -0.3696300 |
| N | 2.3455230  | 2.3928560  | -0.8800080 |
| C | 1.2322620  | 1.6710580  | -0.5660740 |
| C | 0.0165350  | 2.2853550  | -0.1875000 |
| O | -0.0483060 | 3.5479480  | 0.2870910  |
| C | -1.1434370 | 1.5939660  | -0.4634640 |
| H | 0.8072220  | 3.8370060  | 0.6456750  |
| H | 2.2330200  | 3.3755780  | -1.0943890 |
| H | -0.9730320 | 0.1781820  | -1.9411270 |
| C | -2.2167600 | -0.7052840 | -0.4288490 |
| N | -2.2505510 | 1.7917030  | 1.0039130  |

### Molecule I

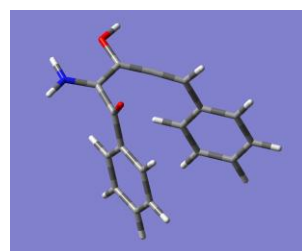

E = -861.506641, H (0K) = -861.239191,  
H (298K) = -861.220669,  
G (298K) = -861.286481 au.  
Imaginary frequency = 0.

|   |            |            |            |
|---|------------|------------|------------|
| C | -0.3486350 | -1.9372600 | 0.8939350  |
| O | 2.4803520  | 0.5750650  | 1.9803980  |
| C | 2.0611790  | 0.5795210  | 0.8391280  |
| N | 3.8308410  | -0.2429870 | -0.6353980 |
| C | 2.6761970  | -0.4697900 | -0.0950840 |
| C | 1.9828380  | -1.7155720 | -0.2910010 |
| O | 2.6486520  | -2.6047560 | -1.0939060 |
| C | 0.8018800  | -1.8803730 | 0.2802310  |
| H | 2.1370890  | -3.4239740 | -1.1835510 |
| H | 4.2919060  | -0.9495950 | -1.2051870 |
| H | -0.3470110 | -2.3490710 | 1.9045440  |
| C | -1.6419440 | -1.4709430 | 0.3751020  |
| C | 1.0240470  | 1.4716570  | 0.3061250  |

|   |            |            |            |   |            |            |            |
|---|------------|------------|------------|---|------------|------------|------------|
| N | -3.0691370 | 2.3923430  | 1.4385710  | C | 0.2856740  | 2.2576020  | 1.2073440  |
| C | 2.4943030  | -0.5062660 | -0.0894400 | C | -0.7115740 | 3.0976020  | 0.7332730  |
| C | 2.5294660  | -1.8719800 | -0.4393880 | C | -0.9711300 | 3.1695300  | -0.6394160 |
| C | 3.6518210  | -2.6357300 | -0.1511240 | C | -0.2351090 | 2.3980920  | -1.5387650 |
| C | 4.7414920  | -2.0585330 | 0.5046040  | C | 0.7563280  | 1.5430610  | -1.0700610 |
| C | 4.7085210  | -0.7107060 | 0.8697130  | C | -1.7764120 | -0.9419180 | -0.9191650 |
| C | 3.5991950  | 0.0681400  | 0.5705500  | C | -3.0089520 | -0.4744280 | -1.3569480 |
| C | -2.2491410 | -1.2814080 | 0.8444510  | C | -4.1227830 | -0.5298550 | -0.5134190 |
| C | -3.3460610 | -2.0505030 | 1.2295800  | C | -3.9981070 | -1.0582420 | 0.7713290  |
| C | -4.4141740 | -2.2379510 | 0.3517040  | C | -2.7639340 | -1.5276300 | 1.2152390  |
| C | -4.3803430 | -1.6614360 | -0.9186010 | H | 0.4950560  | 2.1895150  | 2.2679940  |
| C | -3.2806380 | -0.9003970 | -1.3117010 | H | -1.2909420 | 3.6952050  | 1.4272700  |
| H | 1.6870190  | -2.3173840 | -0.9525190 | H | -1.7524940 | 3.8257730  | -1.0059900 |
| H | 3.6793840  | -3.6802850 | -0.4379330 | H | -0.4410200 | 2.4541060  | -2.6010060 |
| H | 5.6154430  | -2.6584000 | 0.7321280  | H | 1.3154750  | 0.9397550  | -1.7757170 |
| H | 5.5481050  | -0.2677640 | 1.3921700  | H | -0.9145150 | -0.8935520 | -1.5745670 |
| H | 3.5757200  | 1.1058600  | 0.8739880  | H | -3.1040430 | -0.0627940 | -2.3553900 |
| H | -1.4231840 | -1.1329510 | 1.5296590  | H | -5.0827980 | -0.1629050 | -0.8589530 |
| H | -3.3659260 | -2.4999640 | 2.2159660  | H | -4.8593280 | -1.1031030 | 1.4283320  |
| H | -5.2676300 | -2.8343480 | 0.6544330  | H | -2.6620070 | -1.9336880 | 2.2159090  |
| H | -5.2052940 | -1.8085430 | -1.6064560 | H | 4.3093390  | 0.6464480  | -0.5149200 |
| H | -3.2499680 | -0.4559000 | -2.3005780 |   |            |            |            |
| H | 3.0724330  | 1.9384750  | -1.4180340 |   |            |            |            |

#### Molecule J

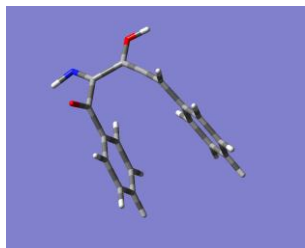

E = -861.051749, H (0K) = -860.797530,  
H (298K) = -860.779200,  
G (298K) = -860.845253 au.

Imaginary frequency = 0.

|   |            |            |            |
|---|------------|------------|------------|
| C | -0.2682480 | -2.0302320 | 0.7889970  |
| O | 2.4072130  | 0.5569610  | 2.0694500  |
| C | 2.0651370  | 0.5401550  | 0.8981830  |
| N | 3.9369990  | -0.1696550 | -0.5372150 |
| C | 2.7793690  | -0.4152470 | -0.0603430 |
| C | 2.0450500  | -1.6510000 | -0.3907520 |
| O | 2.6682340  | -2.4646890 | -1.3047890 |
| C | 0.8824460  | -1.8916920 | 0.1777200  |
| H | 2.1206250  | -3.2511780 | -1.4479350 |
| H | -0.2839180 | -2.5501670 | 1.7476500  |
| C | -1.5646410 | -1.5108320 | 0.3192380  |
| C | 1.0082490  | 1.4229270  | 0.3452580  |
| C | 0.1496710  | 2.0923440  | 1.2308150  |
| C | -0.8587370 | 2.9113140  | 0.7383730  |
| C | -1.0090710 | 3.0818800  | -0.6410540 |
| C | -0.1539930 | 2.4257740  | -1.5263940 |
| C | 0.8456520  | 1.5893110  | -1.0376390 |
| C | -1.7060650 | -0.8762170 | -0.9256490 |
| C | -2.9355150 | -0.3586470 | -1.3155090 |
| C | -4.0458570 | -0.4682100 | -0.4727070 |
| C | -3.9176440 | -1.1036320 | 0.7623470  |

#### TS TS<sup>J-K</sup>

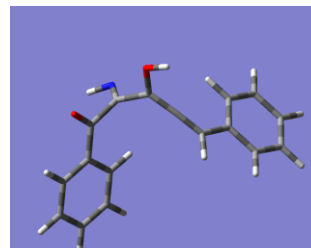

E = -861.040330, H (0K) = -860.786459,  
H (298K) = -860.768733,  
G (298K) = -860.833723 au.

Imaginary frequency = 1.

|   |            |            |            |
|---|------------|------------|------------|
| C | -1.5672400 | 0.1169330  | -1.1700290 |
| O | 3.1989530  | 2.0396020  | -0.3903160 |
| C | 2.4563380  | 1.1871280  | 0.0694720  |
| N | 0.8718380  | 1.7151890  | 1.8908660  |
| C | 1.1173450  | 1.6331990  | 0.6480890  |
| C | 0.0686880  | 1.9950580  | -0.3625430 |
| O | 0.1434280  | 3.3092060  | -0.7618100 |
| C | -0.7693140 | 1.0881700  | -0.7874180 |
| H | -0.4967720 | 3.4631130  | -1.4741220 |
| H | -1.2745820 | -0.4893770 | -2.0280940 |
| C | -2.8497590 | -0.2486440 | -0.5429560 |
| C | 2.7876040  | -0.2587910 | 0.1025730  |
| C | 4.0487300  | -0.6740400 | -0.3556500 |
| C | 4.3830070  | -2.0218880 | -0.3518400 |
| C | 3.4605450  | -2.9693740 | 0.1037900  |
| C | 2.2044920  | -2.5651050 | 0.5561290  |
| C | 1.8665190  | -1.2141360 | 0.5584720  |
| C | -3.3387840 | 0.4097470  | 0.5983100  |
| C | -4.5497730 | 0.0307560  | 1.1663370  |
| C | -5.2955690 | -1.0124570 | 0.6077520  |

|                                                                                                                             |            |            |            |                                                                                                                             |            |            |            |
|-----------------------------------------------------------------------------------------------------------------------------|------------|------------|------------|-----------------------------------------------------------------------------------------------------------------------------|------------|------------|------------|
| C                                                                                                                           | -2.6853260 | -1.6224610 | 1.1559720  | C                                                                                                                           | -4.8191130 | -1.6734180 | -0.5241220 |
| H                                                                                                                           | 0.2754320  | 1.9506870  | 2.2975520  | C                                                                                                                           | -3.6048290 | -1.2947790 | -1.0951650 |
| H                                                                                                                           | -1.5301870 | 3.4152850  | 1.4242150  | H                                                                                                                           | 4.7531250  | 0.0691860  | -0.7095590 |
| H                                                                                                                           | -1.7967750 | 3.7213810  | -1.0237060 | H                                                                                                                           | 5.3582730  | -2.3391760 | -0.7031070 |
| H                                                                                                                           | -0.2734540 | 2.5557530  | -2.5958020 | H                                                                                                                           | 3.7225300  | -4.0216480 | 0.1043320  |
| H                                                                                                                           | 1.4979290  | 1.0733410  | -1.7324680 | H                                                                                                                           | 1.4890370  | -3.3000310 | 0.9065240  |
| H                                                                                                                           | -0.8471420 | -0.7847750 | -1.5802770 | H                                                                                                                           | 0.8868740  | -0.9108600 | 0.9071260  |
| H                                                                                                                           | -3.0304020 | 0.1357240  | -2.2759890 | H                                                                                                                           | -2.7628830 | 1.2175930  | 1.0370820  |
| H                                                                                                                           | -5.0033210 | -0.0618920 | -0.7794930 | H                                                                                                                           | -4.9154420 | 0.5467740  | 2.0474540  |
| H                                                                                                                           | -4.7748110 | -1.1930590 | 1.4205920  | H                                                                                                                           | -6.2394680 | -1.3057460 | 1.0538280  |
| H                                                                                                                           | -2.5837110 | -2.1109100 | 2.1196070  | H                                                                                                                           | -5.3910790 | -2.4837000 | -0.9627660 |
| H                                                                                                                           | 4.2843060  | 0.7360080  | -0.2118670 | H                                                                                                                           | -3.2350350 | -1.8108530 | -1.9752850 |
| H                                                                                                                           |            |            |            | H                                                                                                                           | 1.6701860  | 1.3977870  | 2.4503290  |
| <b>Molecule K</b>                                                                                                           |            |            |            | <b>TS TS<sup>K-L</sup></b>                                                                                                  |            |            |            |
| 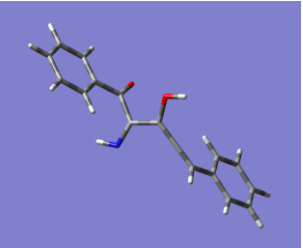                                           |            |            |            |                                          |            |            |            |
| E = -861.046387, H (0K) = -860.792411,<br>H (298K) = -860.773932,<br>G (298K) = -860.841986 au.<br>Imaginary frequency = 0. |            |            |            | E = -861.010581, H (0K) = -860.757164,<br>H (298K) = -860.739721,<br>G (298K) = -860.804310 au.<br>Imaginary frequency = 1. |            |            |            |
| C                                                                                                                           | 2.5755860  | -1.4084560 | 0.2307500  | C                                                                                                                           | 1.7466030  | -0.3572950 | 1.1220520  |
| O                                                                                                                           | -1.5317850 | 1.9490730  | -0.0145470 | O                                                                                                                           | -1.4985450 | 1.5120980  | -1.7253960 |
| C                                                                                                                           | -1.8836640 | 0.7909590  | -0.1659630 | C                                                                                                                           | -1.6074460 | 0.7000140  | -0.8212600 |
| N                                                                                                                           | -0.6377200 | -0.7196080 | -1.6432480 | N                                                                                                                           | 0.4292890  | -0.5749040 | -0.2965330 |
| C                                                                                                                           | -0.7951860 | -0.2387640 | -0.4735150 | C                                                                                                                           | -0.3687140 | 0.3841140  | -0.0117370 |
| C                                                                                                                           | 0.1313560  | -0.5578320 | 0.6413800  | C                                                                                                                           | 0.0384830  | 1.1918760  | 1.1487540  |
| O                                                                                                                           | -0.4486980 | -0.3181080 | 1.8729380  | O                                                                                                                           | -0.8118150 | 2.2168430  | 1.4899130  |
| C                                                                                                                           | 1.3495260  | -1.0031400 | 0.4538160  | C                                                                                                                           | 1.1779960  | 0.7806670  | 1.7187260  |
| H                                                                                                                           | 0.2016300  | -0.4790470 | 2.5722950  | H                                                                                                                           | -0.4676860 | 2.6407530  | 2.2879820  |
| H                                                                                                                           | 2.7620340  | -2.4808180 | 0.1579550  | H                                                                                                                           | 1.5115500  | -1.3093290 | 1.6037600  |
| C                                                                                                                           | 3.7575880  | -0.5417440 | 0.0645050  | C                                                                                                                           | 3.0569740  | -0.3572120 | 0.4198580  |
| C                                                                                                                           | -3.2989110 | 0.3524230  | -0.1384280 | C                                                                                                                           | -2.8684740 | 0.0144360  | -0.4650360 |
| C                                                                                                                           | -4.3077730 | 1.3227320  | -0.0230730 | C                                                                                                                           | -4.0282000 | 0.2936010  | -1.2058910 |
| C                                                                                                                           | -5.6416470 | 0.9393980  | 0.0238420  | C                                                                                                                           | -5.2248200 | -0.3343970 | -0.8861750 |
| C                                                                                                                           | -5.9817060 | -0.4159650 | -0.0372360 | C                                                                                                                           | -5.2753340 | -1.2429400 | 0.1759730  |
| C                                                                                                                           | -4.9850470 | -1.3857840 | -0.1465300 | C                                                                                                                           | -4.1271420 | -1.5229200 | 0.9175830  |
| C                                                                                                                           | -3.6463330 | -1.0055140 | -0.1998070 | C                                                                                                                           | -2.9246940 | -0.8973380 | 0.5998070  |
| C                                                                                                                           | 3.6712570  | 0.8591760  | 0.1296780  | C                                                                                                                           | 3.6145570  | 0.8284130  | -0.0787920 |
| C                                                                                                                           | 4.8076450  | 1.6431390  | -0.0341520 | C                                                                                                                           | 4.8218180  | 0.8001470  | -0.7705660 |
| C                                                                                                                           | 6.0502860  | 1.0447170  | -0.2666230 | C                                                                                                                           | 5.4901290  | -0.4112430 | -0.9683050 |
| C                                                                                                                           | 6.1463550  | -0.3448330 | -0.3339420 | C                                                                                                                           | 4.9438780  | -1.5949240 | -0.4710820 |
| C                                                                                                                           | 5.0079610  | -1.1330120 | -0.1697080 | C                                                                                                                           | 3.7322880  | -1.5675440 | 0.2175670  |
| H                                                                                                                           | -4.0311900 | 2.3690800  | 0.0266140  | H                                                                                                                           | -3.9757250 | 1.0006860  | -2.0250520 |
| H                                                                                                                           | -6.4187000 | 1.6905380  | 0.1087790  | H                                                                                                                           | -6.1194850 | -0.1192090 | -1.4591900 |
| H                                                                                                                           | -7.0237460 | -0.7135910 | 0.0012820  | H                                                                                                                           | -6.2110870 | -1.7314430 | 0.4243200  |
| H                                                                                                                           | -5.2495020 | -2.4359660 | -0.1907750 | H                                                                                                                           | -4.1686830 | -2.2259010 | 1.7414810  |
| H                                                                                                                           | -2.8781630 | -1.7646350 | -0.2846010 | H                                                                                                                           | -2.0366460 | -1.1188500 | 1.1807650  |
| H                                                                                                                           | 2.7097200  | 1.3284780  | 0.3095350  | H                                                                                                                           | 3.1004240  | 1.7693830  | 0.0818060  |
| H                                                                                                                           | 4.7277900  | 2.7234690  | 0.0185550  | H                                                                                                                           | 5.2455580  | 1.7221490  | -1.1531900 |
| H                                                                                                                           | 6.9346070  | 1.6592980  | -0.3936840 | H                                                                                                                           | 6.4331780  | -0.4301820 | -1.5034320 |
| H                                                                                                                           | 7.1061230  | -0.8165270 | -0.5141460 |                                                                                                                             |            |            |            |

|                                                                                                 |            |            |            |                                                                                                 |            |            |            |
|-------------------------------------------------------------------------------------------------|------------|------------|------------|-------------------------------------------------------------------------------------------------|------------|------------|------------|
| H                                                                                               | 5.0843080  | -2.2141360 | -0.2230990 | H                                                                                               | 5.4600230  | -2.5371410 | -0.6186260 |
| H                                                                                               | -1.3607690 | -0.3816110 | -2.2830630 | H                                                                                               | 3.3043900  | -2.4879530 | 0.6013720  |
| <b>Molecule L</b>                                                                               |            |            |            | <b>TS TS<sup>L-5</sup></b>                                                                      |            |            |            |
| 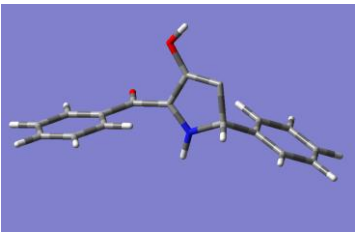               |            |            |            |               |            |            |            |
| E = -861.025288, H (0K) = -860.769697,<br>H (298K) = -860.752187,<br>G (298K) = -860.817127 au. |            |            |            | E = -861.007135, H (0K) = -860.754282,<br>H (298K) = -860.737313,<br>G (298K) = -860.799655 au. |            |            |            |
| Imaginary frequency = 0.                                                                        |            |            |            | Imaginary frequency = 1.                                                                        |            |            |            |
| C                                                                                               | 1.5638560  | -0.7696140 | 0.6356760  | C                                                                                               | 1.5243940  | 0.6740660  | 0.2706530  |
| O                                                                                               | -1.4539050 | 2.0970320  | -0.8359160 | O                                                                                               | -2.6416740 | 1.9967670  | -1.0532050 |
| C                                                                                               | -1.5848300 | 0.9783360  | -0.3665010 | C                                                                                               | -2.0474650 | 1.0924950  | -0.4812900 |
| N                                                                                               | 0.4738080  | -0.4009200 | -0.3145480 | N                                                                                               | 0.2719120  | 0.2049930  | -0.1253550 |
| C                                                                                               | -0.3762390 | 0.3762780  | 0.3065300  | C                                                                                               | -0.6060520 | 1.2508850  | -0.1642530 |
| C                                                                                               | 0.0675980  | 0.5962840  | 1.6516170  | C                                                                                               | 0.0952530  | 2.4014240  | 0.1938000  |
| O                                                                                               | -0.6989250 | 1.3887730  | 2.4707240  | O                                                                                               | -0.4783740 | 3.6296610  | 0.2939170  |
| C                                                                                               | 1.2419130  | -0.0517220 | 1.9162290  | C                                                                                               | 1.4761780  | 2.1331210  | 0.4227700  |
| H                                                                                               | -0.2602310 | 1.4265490  | 3.3323750  | H                                                                                               | 0.1999770  | 4.2354930  | 0.6292530  |
| H                                                                                               | 1.4595930  | -1.8487750 | 0.8053390  | H                                                                                               | 1.4698840  | 1.0445460  | 1.4238980  |
| C                                                                                               | 2.9311980  | -0.4861340 | 0.0373110  | C                                                                                               | 2.7350620  | -0.1648120 | 0.0529380  |
| C                                                                                               | -2.8373370 | 0.1995560  | -0.3904270 | C                                                                                               | -2.7400650 | -0.1735820 | -0.0984430 |
| C                                                                                               | -3.9656900 | 0.7456630  | -1.0245740 | C                                                                                               | -3.8287030 | -0.6003940 | -0.8735330 |
| C                                                                                               | -5.1548810 | 0.0304930  | -1.0602690 | C                                                                                               | -4.5229250 | -1.7549530 | -0.5295840 |
| C                                                                                               | -5.2296290 | -1.2316490 | -0.4617490 | C                                                                                               | -4.1523100 | -2.4815430 | 0.6052390  |
| C                                                                                               | -4.1133860 | -1.7784160 | 0.1721260  | C                                                                                               | -3.0827970 | -2.0527060 | 1.3915740  |
| C                                                                                               | -2.9173730 | -1.0673480 | 0.2085830  | C                                                                                               | -2.3708530 | -0.9085600 | 1.0379530  |
| C                                                                                               | 3.2276550  | 0.7844250  | -0.4696690 | C                                                                                               | 2.7772480  | -1.0844940 | -1.0018010 |
| C                                                                                               | 4.4880390  | 1.0544350  | -0.9965170 | C                                                                                               | 3.9222060  | -1.8515670 | -1.2202770 |
| C                                                                                               | 5.4684990  | 0.0585820  | -1.0170470 | C                                                                                               | 5.0345290  | -1.7066020 | -0.3927760 |
| C                                                                                               | 5.1776660  | -1.2074950 | -0.5120380 | C                                                                                               | 4.9968010  | -0.7886070 | 0.6592450  |
| C                                                                                               | 3.9107970  | -1.4799750 | 0.0098210  | C                                                                                               | 3.8548700  | -0.0247580 | 0.8831450  |
| H                                                                                               | -3.8941720 | 1.7247420  | -1.4827420 | H                                                                                               | -4.1142560 | -0.0252190 | -1.7462880 |
| H                                                                                               | -6.0251380 | 0.4506700  | -1.5511490 | H                                                                                               | -5.3532360 | -2.0890630 | -1.1414500 |
| H                                                                                               | -6.1601960 | -1.7875430 | -0.4899300 | H                                                                                               | -4.6984990 | -3.3782920 | 0.8763100  |
| H                                                                                               | -4.1749470 | -2.7554970 | 0.6367910  | H                                                                                               | -2.8031770 | -2.6072610 | 2.2800970  |
| H                                                                                               | -2.0553070 | -1.4979930 | 0.7052100  | H                                                                                               | -1.5492300 | -0.5763830 | 1.6613520  |
| H                                                                                               | 2.4703740  | 1.5612880  | -0.4491430 | H                                                                                               | 1.9270190  | -1.1941210 | -1.6654510 |
| H                                                                                               | 4.7074520  | 2.0414950  | -1.3888610 | H                                                                                               | 3.9434090  | -2.5569880 | -2.0436320 |
| H                                                                                               | 6.4503910  | 0.2701530  | -1.4259720 | H                                                                                               | 5.9241830  | -2.3019880 | -0.5652140 |
| H                                                                                               | 5.9317960  | -1.9868540 | -0.5271760 | H                                                                                               | 5.8559530  | -0.6719970 | 1.3105060  |
| H                                                                                               | 3.6850060  | -2.4678000 | 0.3975810  | H                                                                                               | 3.8270200  | 0.6809460  | 1.7059990  |
| H                                                                                               | 0.3842280  | -0.7206170 | -1.2735600 | H                                                                                               | 0.0357220  | -0.7625300 | -0.3057500 |
| <b>Molecule 5</b>                                                                               |            |            |            | <b>Molecule MeSO<sub>3</sub>H</b>                                                               |            |            |            |
|              |            |            |            |             |            |            |            |
| E = -861.126354, H (0K) = -860.868723,<br>H (298K) = -860.851628,                               |            |            |            |                                                                                                 |            |            |            |

G (298K) = -860.913799 au.

Imaginary frequency = 0.

|   |            |            |            |
|---|------------|------------|------------|
| C | 1.5107370  | 0.7280310  | 0.0304900  |
| O | -2.8426840 | 2.2006980  | -0.2465370 |
| C | -2.1017840 | 1.2233440  | -0.0938150 |
| N | 0.2288630  | 0.2939300  | -0.0784080 |
| C | -0.6672150 | 1.3586580  | 0.0112530  |
| C | 0.1269740  | 2.5027120  | 0.2058460  |
| O | -0.3685340 | 3.7500980  | 0.3787930  |
| C | 1.4766590  | 2.1132530  | 0.2253940  |
| H | 0.3633130  | 4.3544090  | 0.5708270  |
| H | 2.3266730  | 2.7579000  | 0.3902970  |
| C | 2.6624650  | -0.1725260 | -0.0461270 |
| C | -2.7029270 | -0.1552050 | -0.0287000 |
| C | -3.7487010 | -0.4695040 | -0.9070520 |
| C | -4.3603070 | -1.7188550 | -0.8549260 |
| C | -3.9503800 | -2.6597830 | 0.0930530  |
| C | -2.9247310 | -2.3465430 | 0.9849210  |
| C | -2.2961320 | -1.1030650 | 0.9201690  |
| C | 2.5215620  | -1.5565230 | 0.1557990  |
| C | 3.6266120  | -2.4001480 | 0.0789220  |
| C | 4.8931680  | -1.8801000 | -0.1919830 |
| C | 5.0452010  | -0.5059770 | -0.3874990 |
| C | 3.9424090  | 0.3403420  | -0.3187180 |
| H | -4.0716330 | 0.2699830  | -1.6307920 |
| H | -5.1582400 | -1.9589940 | -1.5489490 |
| H | -4.4323490 | -3.6301850 | 0.1385510  |
| H | -2.6143670 | -3.0675470 | 1.7330230  |
| H | -1.5078980 | -0.8629850 | 1.6243850  |
| H | 1.5507780  | -1.9784210 | 0.3917000  |
| H | 3.4987070  | -3.4648920 | 0.2400350  |
| H | 5.7529000  | -2.5383430 | -0.2483050 |
| H | 6.0246320  | -0.0923960 | -0.6013100 |
| H | 4.0716950  | 1.4028220  | -0.4891720 |
| H | -0.0381630 | -0.6438960 | -0.3416430 |

E = -664.447980, H (0K) = -664.387135,

H (298K) = -664.380354,

G (298K) = -664.416068 au.

Imaginary frequency = 0.

|   |            |            |            |
|---|------------|------------|------------|
| S | 0.0883790  | -0.1410230 | 0.0441500  |
| O | 0.4277220  | -1.1894970 | -0.9077020 |
| O | 0.4855940  | -0.2706130 | 1.4445160  |
| O | 0.7887560  | 1.2085290  | -0.5687100 |
| H | 0.8402070  | 1.9020660  | 0.1149150  |
| C | -1.6548970 | 0.2418200  | -0.0576790 |
| H | -2.1916190 | -0.6333280 | 0.3110650  |
| H | -1.8527130 | 1.1104480  | 0.5701390  |
| H | -1.8971320 | 0.4389180  | -1.1012880 |

Molecule **MeSO<sub>3</sub><sup>-</sup>**

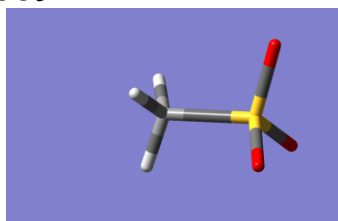

E = -664.003086, H (0K) = -663.953453,

H (298K) = -663.947384,

G (298K) = -663.981799 au.

Imaginary frequency = 0.

|   |            |            |            |
|---|------------|------------|------------|
| S | -0.1563910 | 0.0001110  | -0.0001270 |
| O | -0.5600170 | -1.1022400 | -0.9252640 |
| O | -0.5566720 | 1.3531610  | -0.4929920 |
| O | -0.5613100 | -0.2489510 | 1.4169430  |
| C | 1.6539450  | -0.0018500 | 0.0013390  |
| H | 2.0014520  | 0.1824560  | -1.0156440 |
| H | 2.0013550  | 0.7864610  | 0.6698720  |
| H | 1.9997700  | -0.9753550 | 0.3502790  |

Molecule **N<sub>2</sub>**

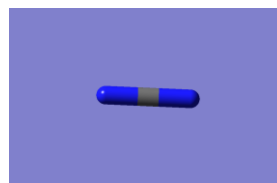

E = -109.554666, H (0K) = -109.549088,

H (298K) = -109.545783,

G (298K) = -109.567519 au.

Imaginary frequency = 0.

|   |           |           |            |
|---|-----------|-----------|------------|
| N | 0.0000000 | 0.0000000 | 0.5475300  |
| N | 0.0000000 | 0.0000000 | -0.5475300 |

Molecule **(1RR,3SR,6RR)-Ph<sup>e</sup>-4<sup>inv</sup>**

**TS N-inversion (1RR,3SR,6RR)-Ph<sup>e</sup> 4**

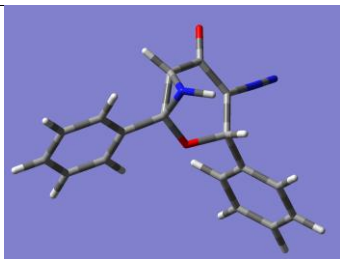

E = -970.550885, H (0K) = -970.284110,  
H (298K) = -970.265633,  
G (298K) = -970.332465 au.

Imaginary frequency = 0.

|   |            |            |            |
|---|------------|------------|------------|
| C | -1.0379720 | 0.3132830  | -0.7318390 |
| O | 0.2257480  | -0.3048000 | -0.4365300 |
| C | 1.3767990  | 0.4943400  | -0.5056910 |
| N | 1.4989980  | 1.5373480  | -1.4947330 |
| C | 1.2854910  | 1.9432660  | -0.0778440 |
| C | -0.0302460 | 2.4484280  | 0.4125460  |
| O | -0.1118030 | 3.4646830  | 1.1006310  |
| C | -1.1613260 | 1.5997030  | 0.0802000  |
| H | 2.1389730  | 2.4208270  | 0.3899150  |
| H | 0.6688970  | 1.6549590  | -2.0714370 |
| H | -1.0746370 | 0.5536200  | -1.7989340 |
| C | -2.1278920 | -0.6856870 | -0.4213590 |
| N | -2.3289580 | 1.9627690  | 0.5390820  |
| N | -3.3234170 | 2.3056900  | 0.9451140  |
| C | 2.5913970  | -0.3194780 | -0.1720510 |
| C | 3.8455870  | 0.0380160  | -0.6775550 |
| C | 4.9783180  | -0.6980130 | -0.3326610 |
| C | 4.8704420  | -1.7965300 | 0.5208140  |
| C | 3.6207530  | -2.1549210 | 1.0276580  |
| C | 2.4856930  | -1.4210560 | 0.6855490  |
| C | -2.1979610 | -1.2812150 | 0.8428510  |
| C | -3.2184910 | -2.1826650 | 1.1338650  |
| C | -4.1816830 | -2.4864710 | 0.1681220  |
| C | -4.1174120 | -1.8892090 | -1.0898850 |
| C | -3.0895880 | -0.9917880 | -1.3850170 |
| H | 3.9305880  | 0.8888250  | -1.3423730 |
| H | 5.9447420  | -0.4138320 | -0.7345330 |
| H | 5.7519910  | -2.3692190 | 0.7871510  |
| H | 3.5270470  | -3.0081220 | 1.6906310  |
| H | 1.5182980  | -1.7056970 | 1.0790830  |
| H | -1.4532020 | -1.0382810 | 1.5923140  |
| H | -3.2663120 | -2.6455970 | 2.1132750  |
| H | -4.9779930 | -3.1860380 | 0.3973190  |
| H | -4.8621090 | -2.1220260 | -1.8428220 |
| H | -3.0356780 | -0.5291550 | -2.3648650 |

Molecule *cis*-2-oxa-7-azabicyclo[4.1.0]heptane

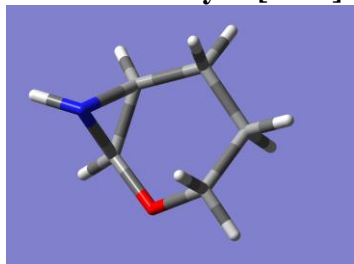

E = -325.990609, H (0K) = -325.851137,

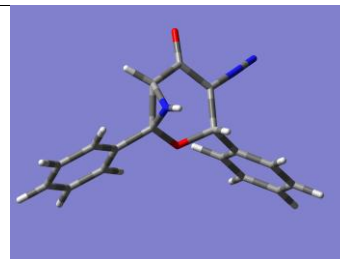

E = -970.532870, H (0K) = -970.268326,  
H (298K) = -970.249918,  
G (298K) = -970.316259 au.

Imaginary frequency = 1.

|   |            |            |            |
|---|------------|------------|------------|
| C | 1.0151860  | 0.2771680  | 0.7048350  |
| O | -0.2210850 | -0.3489470 | 0.3323560  |
| C | -1.3766290 | 0.4492150  | 0.5161890  |
| N | -1.3806750 | 1.4467730  | 1.4576440  |
| C | -1.2875440 | 1.9709460  | 0.1427420  |
| C | 0.0264280  | 2.4569410  | -0.3897440 |
| O | 0.1113470  | 3.4632560  | -1.0916550 |
| C | 1.1524190  | 1.5904890  | -0.0668670 |
| H | -2.1526110 | 2.4606760  | -0.3033160 |
| H | 0.9898480  | 0.4971480  | 1.7752230  |
| C | 2.1377310  | -0.6915420 | 0.4146160  |
| N | 2.3151580  | 1.9401210  | -0.5459960 |
| N | 3.3057650  | 2.2806090  | -0.9659760 |
| C | -2.6041650 | -0.3388930 | 0.1639420  |
| C | -3.8323650 | -0.0086960 | 0.7453150  |
| C | -4.9866390 | -0.7107460 | 0.4010190  |
| C | -4.9245800 | -1.7507200 | -0.5273260 |
| C | -3.7005050 | -2.0837480 | -1.1092880 |
| C | -2.5448590 | -1.3825870 | -0.7674230 |
| C | 2.2604960  | -1.2729970 | -0.8524580 |
| C | 3.3132600  | -2.1431790 | -1.1242200 |
| C | 4.2572720  | -2.4316270 | -0.1352530 |
| C | 4.1409990  | -1.8497040 | 1.1263140  |
| C | 3.0813740  | -0.9830680 | 1.4008600  |
| H | -3.8799280 | 0.7974220  | 1.4686350  |
| H | -5.9326590 | -0.4480410 | 0.8617680  |
| H | -5.8219250 | -2.2984630 | -0.7934990 |
| H | -3.6436350 | -2.8915760 | -1.8308150 |
| H | -1.5971130 | -1.6456480 | -1.2195200 |
| H | 1.5303930  | -1.0429510 | -1.6201180 |
| H | 3.4008250  | -2.5937670 | -2.1067340 |
| H | 5.0784470  | -3.1069700 | -0.3490380 |
| H | 4.8701020  | -2.0707170 | 1.8979520  |
| H | 2.9880830  | -0.5322920 | 2.3833920  |
| H | -1.4009440 | 1.7046700  | 2.4312370  |

Molecule *trans*-2-oxa-7-azabicyclo[4.1.0]heptane

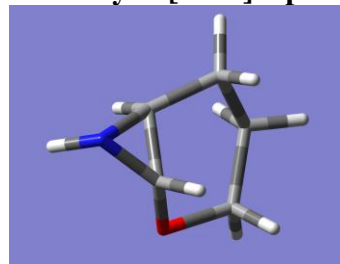

E = -325.922061, H (0K) = -325.783325,

H (298K) = -325.844379,  
G (298K) = -325.880552 au.

Imaginary frequency = 0.

|   |            |            |            |
|---|------------|------------|------------|
| C | 0.9212120  | 0.8515370  | 0.3167410  |
| C | 1.0122680  | -0.6249100 | 0.4409700  |
| C | -1.2170920 | -0.8753480 | -0.4058490 |
| C | -1.5747170 | 0.4964140  | 0.1487750  |
| C | -0.4155250 | 1.4917450  | -0.0289850 |
| H | 1.7082640  | -1.0711860 | 1.1428630  |
| H | 1.6012950  | 1.4396850  | 0.9249890  |
| H | -0.9806840 | -0.8156800 | -1.4747730 |
| H | -2.0342090 | -1.5857420 | -0.2729650 |
| H | -2.4757620 | 0.8625830  | -0.3517700 |
| H | -1.8110220 | 0.3866280  | 1.2129430  |
| H | -0.3827910 | 1.8501290  | -1.0631120 |
| H | -0.5756230 | 2.3651750  | 0.6088250  |
| N | 1.5480990  | 0.0164290  | -0.7535500 |
| H | 2.5628660  | 0.0620470  | -0.7080780 |
| O | -0.1007390 | -1.4556590 | 0.3032520  |

H (298K) = -325.776538,  
G (298K) = -325.812606 au.

Imaginary frequency = 0.

|   |            |            |            |
|---|------------|------------|------------|
| C | -0.7696670 | 0.7147130  | -0.3378310 |
| C | -0.8187910 | -0.5465680 | 0.3837020  |
| C | 1.3427750  | -0.9298080 | 0.0954420  |
| C | 1.5339200  | 0.6043630  | -0.1812510 |
| C | 0.3480070  | 1.5590980  | 0.2356960  |
| H | -0.6033320 | 0.5478290  | -1.3996970 |
| H | 1.5434520  | -1.1313800 | 1.1542100  |
| H | 2.0530130  | -1.4985250 | -0.5050310 |
| H | 2.4588980  | 0.8904920  | 0.3288730  |
| H | 1.7052460  | 0.7444650  | -1.2527710 |
| H | 0.2790090  | 1.6680760  | 1.3204160  |
| H | 0.4865010  | 2.5479060  | -0.2111060 |
| N | -2.0970520 | 0.0994170  | 0.0565140  |
| H | -2.5149570 | -0.2311720 | -0.8123920 |
| O | 0.0157050  | -1.5160660 | -0.2070000 |
| H | -0.6715670 | -0.5158630 | 1.4633620  |

Molecule *trans*-fused-Ph<sup>e</sup>-4

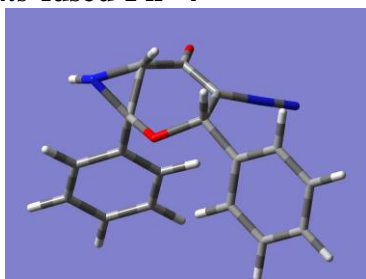

E = -970.479655, H (0K) = -970.212809,  
H (298K) = -970.194572,  
G (298K) = -970.258970 au.

Imaginary frequency = 0.

|   |            |            |            |
|---|------------|------------|------------|
| C | 1.0017440  | 0.9140460  | 0.8519090  |
| O | -0.0827890 | 0.2751170  | 1.6330870  |
| C | -1.3346540 | 0.6973550  | 1.1494330  |
| N | -2.2436460 | 1.6700680  | 1.7827320  |
| C | -1.2716060 | 2.1617170  | 0.8076980  |
| C | -0.8584540 | 2.1746910  | -0.6310890 |
| O | -1.4030790 | 2.4923220  | -1.6675430 |
| C | 0.4866260  | 1.5239580  | -0.4892650 |
| H | -3.1867440 | 1.5309570  | 1.4248240  |
| H | 1.3709030  | 1.7392250  | 1.4660750  |
| C | 2.1219700  | -0.0780000 | 0.6432400  |
| N | 1.1876660  | 1.3581400  | -1.5732800 |
| N | 1.7648860  | 1.2442870  | -2.5380520 |
| C | -2.0334360 | -0.3917360 | 0.3569330  |
| C | -3.2392170 | -0.9127010 | 0.8478760  |
| C | -3.8845710 | -1.9628600 | 0.1970630  |
| C | -3.3354880 | -2.5116290 | -0.9606780 |
| C | -2.1289340 | -2.0124560 | -1.4499860 |
| C | -1.4777160 | -0.9714930 | -0.7912040 |
| C | 1.8683080  | -1.4370880 | 0.4383980  |
| C | 2.9221570  | -2.3150870 | 0.1889570  |
| C | 4.2344570  | -1.8426500 | 0.1357840  |
| C | 4.4912200  | -0.4870280 | 0.3424660  |
| C | 3.4388880  | 0.3906920  | 0.6005300  |

|   |            |            |            |
|---|------------|------------|------------|
| H | -3.6780540 | -0.5121980 | 1.7549970  |
| H | -4.8131660 | -2.3521040 | 0.5993950  |
| H | -3.8382150 | -3.3249940 | -1.4720460 |
| H | -1.6861360 | -2.4359710 | -2.3446170 |
| H | -0.5334990 | -0.6243660 | -1.1830000 |
| H | 0.8525310  | -1.8065260 | 0.4847300  |
| H | 2.7174510  | -3.3690460 | 0.0359210  |
| H | 5.0520290  | -2.5277050 | -0.0599090 |
| H | 5.5086070  | -0.1133560 | 0.3098210  |
| H | 3.6392620  | 1.4443930  | 0.7661110  |
| H | -0.4881290 | 2.6663330  | 1.3651400  |

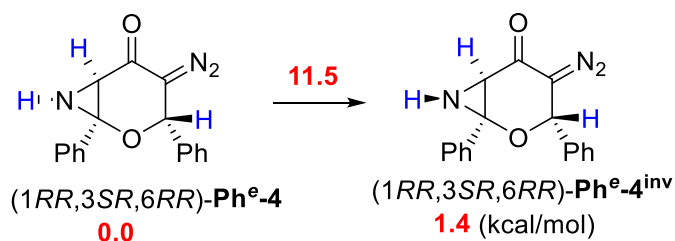

**Figure S2:** Relative Gibbs free energies of the  $(1RR,3SR,6RR)\text{-Ph}^e\text{-4}$  isomer and isomer with inverted azirine nitrogen  $(1RR,3SR,6RR)\text{-Ph}^e\text{-4}^{inv}$ , and the transition state for inversion (**TS N-inversion**  $(1RR,3SR,6RR)\text{-Ph}^e\text{-4}$ ) (in kcal/mol, 298 K, DFT B3LYP-D3/6-311+G(d,p) level of theory with a SMD solvent model for MeCN).

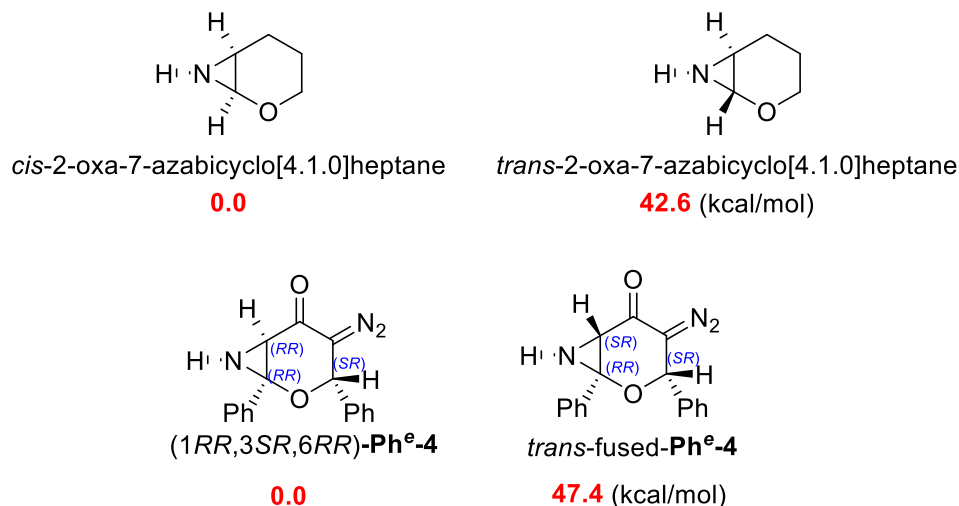

**Figure S3:** Relative Gibbs free energies of *cis*-2-oxa-7-azabicyclo[4.1.0]heptane isomer/*trans*-2-oxa-7-azabicyclo[4.1.0]heptane isomer and  $(1RR,3SR,6RR)\text{-Ph}^e\text{-4}$  isomer/*trans*-fused- $\text{Ph}^e\text{-4}$ , (in kcal/mol, 298 K, DFT B3LYP-D3/6-311+G(d,p) level of theory with a SMD solvent model for MeCN).

## References

1. Sakharov, P. A.; Novikov, M. S.; Khlebnikov, A. F. *J. Org. Chem.* **2018**, *83*, 8304–8314. doi:10.1021/acs.joc.8b01004.
2. Bodunov V. A., Galenko E. E., Sakharov P.A., Novikov M. S., Khlebnikov A. F. *J. Org. Chem.* **2019**, *84*, 10388–10401. doi:10.1021/acs.joc.9b01573.
3. Galenko E. E., Bodunov V. A., Kryukova M. A., Novikov M. S., Khlebnikov A. F. *J. Org. Chem.* **2021**, *86*, 4098–4111. doi 10.1021/acs.joc.0c02928.
4. Zanakhov, T. O.; Galenko, E. E.; Novikov, M. S.; Khlebnikov, A. F. *J. Org. Chem.* **2022**, *87*, 15598–15607. doi 10.1021/acs.joc.2c02177.
5. Park, K. K.; Jeong, J. *Tetrahedron* **2005**, *61*, 545–553. doi:10.1016/j.tet.2004.11.022.
6. Tong, Z.; Tang, Z.; Au, C.-T.; Qiu, R. *J. Org. Chem.* **2020**, *85*, 8533–8543. doi:10.1021/acs.joc.0c00858.
7. Zanakhov, T. O.; Galenko, E. E.; Novikov, M. S.; Khlebnikov, A. F. *J. Org. Chem.* **2023**, *88*, 13191–13204. doi:10.1021/acs.joc.3c01413.
8. Dolomanov, O. V.; Bourhis, L. J.; Gildea, R. J.; Howard, J. A. K.; Puschmann, H. *J. Appl. Cryst.* **2009**, *42*, 339.
9. Sheldrick, G. M. *Acta Cryst.* **2015**, *A71*, 3–9. doi: 10.1107/S2053273314026370.
10. Sheldrick, G. M. *Acta Cryst.* **2015**, *C71*, 3-8. doi: 10.1107/S2053229614024218.
11. Gaussian 09, Revision D.01, M. J. Frisch, G. W. Trucks, H. B. Schlegel, G. E. Scuseria, M. A. Robb, J. R. Cheeseman, G. Scalmani, V. Barone, B. Mennucci, G. A. Petersson, H. Nakatsuji, M. Caricato, X. Li, H. P. Hratchian, A. F. Izmaylov, J. Bloino, G. Zheng, J. L. Sonnenberg, M. Hada, M. Ehara, K. Toyota, R. Fukuda, J. Hasegawa, M. Ishida, T. Nakajima, Y. Honda, O. Kitao, H. Nakai, T. Vreven, J. A. Montgomery, Jr., J. E. Peralta, F. Ogliaro, M. Bearpark, J. J. Heyd, E. Brothers, K. N. Kudin, V. N. Staroverov, T. Keith, R. Kobayashi, J. Normand, K. Raghavachari, A. Rendell, J. C. Burant, S. S. Iyengar, J. Tomasi, M. Cossi, N. Rega, J. M. Millam, M. Klene, J. E. Knox, J. B. Cross, V. Bakken, C. Adamo, J. Jaramillo, R. Gomperts, R. E. Stratmann, O. Yazyev, A. J. Austin, R. Cammi, C. Pomelli, J. W. Ochterski, R. L. Martin, K. Morokuma, V. G. Zakrzewski, G. A. Voth, P. Salvador, J. J. Dannenberg, S. Dapprich, A. D. Daniels, O. Farkas, J. B. Foresman, J. V. Ortiz, J. Cioslowski, and D. J. Fox, Gaussian, Inc., Wallingford CT, **2013**..
12. (a) Becke, A. D. *J. Chem. Phys.* **1993**, *98*, 5648–5652. doi: 10.1063/1.464913. (b) Becke, A. D. *Phys. Rev. A* **1988**, *38*, 3098–3100. doi: 10.1103/PhysRevA.38.3098. (c) Lee, C.; Yang, W.; Parr, R. G. *Phys. Rev. B* **1988**, *37*, 785–789. doi: 10.1103/PhysRevB.37.785.
13. (a) Grimme, S.; Antony, J.; Ehrlich, S.; Krieg, H. *J. Chem. Phys.* **2010**, *132*, 154104. doi: 10.1063/1.3382344. (b) Grimme, S.; Ehrlich, S.; Goerigk, L. *J. Comput. Chem.* **2011**, *32*, 1456–1465. doi: 10.1002/jcc.21759.
14. Marenich, A. V.; Cramer, C. J.; Truhlar, D. G. *J. Phys. Chem. B*, **2009**, *113*, 6378–6396. doi: 10.1021/jp810292n.
